# Supplementary material
Source: publisher figshare collection journal article supplement (https://geolsoc.figshare.com/ndownloader/files/28009481)
Supplement: Supplementary file 1 [file 28009481]

## Sheet: Initial Input
Table S6a. Parental composition and conditions used for the Rhyolite MELTS models of Phan Si Pan Uplift anf Tu Le basin granitic rocks
Oxides (wt%)	Permian granitic rocks of PSP-Tu Le region
	HK-61 (Wang et al.,2007)	Model PFC1	Model PFC2a-isobaric and polybaric stage 1	Model PFC2b- polybaric stage 2	Model PFC3		IGCP15 (Anh et al., 2011)	Model VFC1		ML04-37 (Li et al., 2010)	Model VFC2	Model VFC3
SiO2 (wt%)	45.52	46.29	46.25	56.33	46.27		54.51	54.33		52.16	53.26	53.26
TiO2	3.29	3.35	3.34	0.64	3.34		3.81	3.8		2.26	2.31	2.31
Al2O3	13.85	14.09	14.07	19.21	14.08		12.18	12.14		14.97	15.29	15.29
Fe2O3t	15.22						13.08			11.65
Fe2O3		2.18	2.1	1.17	1.58			1.98			1.5	1.47
FeO		11.97	12.03	5.02	12.5			9.94			9.35	9.38
MnO	0.25	0.25	0.25	0.44	0.25		0.16	0.16		0.12	0.12	0.12
MgO	4.7	4.78	4.78	0.89	4.78		2.59	2.58		5.99	6.12	6.12
CaO	9.47	9.63	9.62	4.92	9.63		5.67	5.65		3.97	4.05	4.05
Na2O	2.77	2.82	2.81	4.68	2.82		4.41	4.4		3.67	3.75	3.75
K2O	1.26	1.28	1.28	2.22	1.28		1.81	1.8		1.32	1.35	1.45
P2O5	0.71	0.72	0.72	0.62	0.72		0.53	0.53		0.14	0.14	0.15
H2O		2.64	2.74	3.86	2.74			2.69			2.76	2.76
H2Oinitial		2.7 (wt%)	2.7 (wt%)	3.86 (wt%)	2.7 (wt%)			2.7 (wt%)			2.7 (wt%)	2.7 (wt%)
ƒO2		FMQ 0	FMQ 0	FMQ 0	FMQ -1						FMQ 0	FMQ 0
Temperature input (oC)		1300	1300	990	1300						1300	1300
Pressure (MPa)		1	5	1	1
QFM = quartz-fayalite-magnetite buﬀer.
All major elements data for models normalized to 100% including water.
Refs:
Anh, T.V., Pang, K.N., Chung, S.L., Lin, H.M., Hoa, T.T., Anh, T.T., Yang, H.J., 2011. The Song Da magmatic suite revisited: A petrologic, geochemical and Sr-Nd isotopic study on picrites, flood basalts and silicic volcanic rocks. Journal of Asian Earth Sciences, 42, 1341–1355.
Li, J., Xu, J.F., Suzuki, K., He, B., Xu, Y.G., Ren, Z.Y., 2010. Os, Nd and Sr isotope and trace element geochemistry of the Muli picrites: Insights into the mantle source of the Emeishan Large Igneous Province. Lithos, 119, 108-122.
Wang, C.Y., Zhou, M.F., Qi, L. 2007. Permian flood basalts and mafic intrusions in the Jinping (SW China)–Song Da (northern Vietnam) district: mantle sources, crustal contamination, and sulfide segregation. Chemical Geology, 243, 317–343.

## Sheet: PFC1-isobaric-FMQ_1MPa
**********----------**********
Title:	Dummy	Title
T	=	1300	(C)	P	=	1	(kbars)	log(10)	f	O2	=	-7.18	delta	HM	=	-5.5	NNO	=	-0.69	QFM	=	0	COH	=	2.27	IW	=	3.41
Constraint	Flags:	fO2	path	=	QFM	Fractionate	Solids
Liquid	mass	=	98.33	(gm)	density	=	2.47	(gm/cc)	viscosity	=	1.1	(log	10	poise)	(analysis	in	wt	%)
	G	=	-1.58154e+06	(J)	H	=	-1.12082e+06	(J)	S	=	292.86	(J/K)	V	=	39.84	(cc)	Cp	=	146.77	(J/K)
	SiO2	TiO2	Al2O3	Fe2O3	Cr2O3	FeO	MnO	MgO	NiO	CoO	CaO	Na2O	K2O	P2O5	H2O	CO2	SO3	Cl2O-1	F2O-1
	46.29	3.35	14.09	2.18	0	11.97	0.25	4.78	0	0	9.63	2.82	1.28	0.72	2.64	0	0	0	0
water	mass	=	0.1	(gm)	density	=	0.13	(gm/cc)
	H2O
	G	=	-2792.2	(J)	H	=	-1082.56	(J)	S	=	1.09	(J/K)	V	=	0.75	(cc)	Cp	=	0.3	(J/K)
Total	solids	mass	=	0.1	(gm)	density	=	0.13	(gm/cc)
	G	=	-2792.2	(J)	H	=	-1082.56	(J)	S	=	1.09	(J/K)	V	=	0.75	(cc)	Cp	=	0.3	(J/K)
Summary	of	all	fractionated	phases:	(total	mass	=	0	grams)
Viscosity	of	the	System:	1.13	(log	10	poise)
System	mass	=	98.43	(gm)	density	=	2.42	(gm/cc)
	G	=	-1.58433e+06	(J)	H	=	-1.12191e+06	(J)	S	=	293.95	(J/K)	V	=	40.59	(cc)	Cp	=	147.07	(J/K)
Oxygen	delta	moles	=	2.84563e-06	delta	grams	=	9.10566e-05
	G	=	-1.04	(J)	H	=	0.12	(J)	S	=	0	(J/K)	V	=	0.37	(cc)	Cp	=	0	(J/K)
**********----------**********
Title:	Dummy	Title
T	=	1290	(C)	P	=	1	(kbars)	log(10)	f	O2	=	-7.28	delta	HM	=	-5.5	NNO	=	-0.69	QFM	=	0	COH	=	2.27	IW	=	3.42
Constraint	Flags:	fO2	path	=	QFM	Fractionate	Solids
Liquid	mass	=	98.34	(gm)	density	=	2.47	(gm/cc)	viscosity	=	1.13	(log	10	poise)	(analysis	in	wt	%)
	G	=	-1.57882e+06	(J)	H	=	-1.12238e+06	(J)	S	=	292	(J/K)	V	=	39.79	(cc)	Cp	=	146.79	(J/K)
	SiO2	TiO2	Al2O3	Fe2O3	Cr2O3	FeO	MnO	MgO	NiO	CoO	CaO	Na2O	K2O	P2O5	H2O	CO2	SO3	Cl2O-1	F2O-1
	46.29	3.35	14.08	2.18	0	11.96	0.25	4.78	0	0	9.63	2.82	1.28	0.72	2.65	0	0	0	0
water	mass	=	0.09	(gm)	density	=	0.14	(gm/cc)
	H2O
	G	=	-2587.59	(J)	H	=	-1009.93	(J)	S	=	1.01	(J/K)	V	=	0.7	(cc)	Cp	=	0.28	(J/K)
Total	solids	mass	=	0.09	(gm)	density	=	0.14	(gm/cc)
	G	=	-2587.59	(J)	H	=	-1009.93	(J)	S	=	1.01	(J/K)	V	=	0.7	(cc)	Cp	=	0.28	(J/K)
Summary	of	all	fractionated	phases:	(total	mass	=	0	grams)
Viscosity	of	the	System:	1.16	(log	10	poise)
System	mass	=	98.43	(gm)	density	=	2.43	(gm/cc)
	G	=	-1.58141e+06	(J)	H	=	-1.12339e+06	(J)	S	=	293.01	(J/K)	V	=	40.49	(cc)	Cp	=	147.06	(J/K)
Oxygen	delta	moles	=	2.18847e-05	delta	grams	=	0.000700286
	G	=	-7.94	(J)	H	=	0.94	(J)	S	=	0.01	(J/K)	V	=	2.84	(cc)	Cp	=	0	(J/K)
**********----------**********
Title:	Dummy	Title
T	=	1280	(C)	P	=	1	(kbars)	log(10)	f	O2	=	-7.38	delta	HM	=	-5.5	NNO	=	-0.68	QFM	=	0	COH	=	2.26	IW	=	3.43
Constraint	Flags:	fO2	path	=	QFM	Fractionate	Solids
Liquid	mass	=	98.34	(gm)	density	=	2.47	(gm/cc)	viscosity	=	1.16	(log	10	poise)	(analysis	in	wt	%)
	G	=	-1.57612e+06	(J)	H	=	-1.12394e+06	(J)	S	=	291.14	(J/K)	V	=	39.75	(cc)	Cp	=	146.8	(J/K)
	SiO2	TiO2	Al2O3	Fe2O3	Cr2O3	FeO	MnO	MgO	NiO	CoO	CaO	Na2O	K2O	P2O5	H2O	CO2	SO3	Cl2O-1	F2O-1
	46.29	3.35	14.08	2.19	0	11.95	0.25	4.78	0	0	9.63	2.82	1.28	0.72	2.66	0	0	0	0
water	mass	=	0.09	(gm)	density	=	0.14	(gm/cc)
	H2O
	G	=	-2381.45	(J)	H	=	-935.69	(J)	S	=	0.93	(J/K)	V	=	0.64	(cc)	Cp	=	0.26	(J/K)
Total	solids	mass	=	0.09	(gm)	density	=	0.14	(gm/cc)
	G	=	-2381.45	(J)	H	=	-935.69	(J)	S	=	0.93	(J/K)	V	=	0.64	(cc)	Cp	=	0.26	(J/K)
Summary	of	all	fractionated	phases:	(total	mass	=	0	grams)
Viscosity	of	the	System:	1.19	(log	10	poise)
System	mass	=	98.43	(gm)	density	=	2.44	(gm/cc)
	G	=	-1.5785e+06	(J)	H	=	-1.12487e+06	(J)	S	=	292.07	(J/K)	V	=	40.39	(cc)	Cp	=	147.06	(J/K)
Oxygen	delta	moles	=	4.20168e-05	delta	grams	=	0.00134449
	G	=	-15.14	(J)	H	=	1.79	(J)	S	=	0.01	(J/K)	V	=	5.43	(cc)	Cp	=	0	(J/K)
**********----------**********
Title:	Dummy	Title
T	=	1270	(C)	P	=	1	(kbars)	log(10)	f	O2	=	-7.48	delta	HM	=	-5.5	NNO	=	-0.68	QFM	=	0	COH	=	2.25	IW	=	3.44
Constraint	Flags:	fO2	path	=	QFM	Fractionate	Solids
Liquid	mass	=	98.35	(gm)	density	=	2.48	(gm/cc)	viscosity	=	1.19	(log	10	poise)	(analysis	in	wt	%)
	G	=	-1.57342e+06	(J)	H	=	-1.1255e+06	(J)	S	=	290.27	(J/K)	V	=	39.7	(cc)	Cp	=	146.81	(J/K)
	SiO2	TiO2	Al2O3	Fe2O3	Cr2O3	FeO	MnO	MgO	NiO	CoO	CaO	Na2O	K2O	P2O5	H2O	CO2	SO3	Cl2O-1	F2O-1
	46.28	3.35	14.08	2.2	0	11.95	0.25	4.78	0	0	9.63	2.82	1.28	0.72	2.66	0	0	0	0
water	mass	=	0.08	(gm)	density	=	0.14	(gm/cc)
	H2O
	G	=	-2173.76	(J)	H	=	-859.8	(J)	S	=	0.85	(J/K)	V	=	0.58	(cc)	Cp	=	0.24	(J/K)
Total	solids	mass	=	0.08	(gm)	density	=	0.14	(gm/cc)
	G	=	-2173.76	(J)	H	=	-859.8	(J)	S	=	0.85	(J/K)	V	=	0.58	(cc)	Cp	=	0.24	(J/K)
Summary	of	all	fractionated	phases:	(total	mass	=	0	grams)
Viscosity	of	the	System:	1.21	(log	10	poise)
System	mass	=	98.43	(gm)	density	=	2.44	(gm/cc)
	G	=	-1.57559e+06	(J)	H	=	-1.12635e+06	(J)	S	=	291.12	(J/K)	V	=	40.28	(cc)	Cp	=	147.05	(J/K)
Oxygen	delta	moles	=	6.32753e-05	delta	grams	=	0.00202473
	G	=	-22.63	(J)	H	=	2.67	(J)	S	=	0.02	(J/K)	V	=	8.12	(cc)	Cp	=	0	(J/K)
**********----------**********
Title:	Dummy	Title
T	=	1260	(C)	P	=	1	(kbars)	log(10)	f	O2	=	-7.58	delta	HM	=	-5.51	NNO	=	-0.68	QFM	=	0	COH	=	2.24	IW	=	3.45
Constraint	Flags:	fO2	path	=	QFM	Fractionate	Solids
Liquid	mass	=	98.36	(gm)	density	=	2.48	(gm/cc)	viscosity	=	1.22	(log	10	poise)	(analysis	in	wt	%)
	G	=	-1.57074e+06	(J)	H	=	-1.12706e+06	(J)	S	=	289.39	(J/K)	V	=	39.66	(cc)	Cp	=	146.83	(J/K)
	SiO2	TiO2	Al2O3	Fe2O3	Cr2O3	FeO	MnO	MgO	NiO	CoO	CaO	Na2O	K2O	P2O5	H2O	CO2	SO3	Cl2O-1	F2O-1
	46.28	3.34	14.08	2.2	0	11.94	0.25	4.78	0	0	9.63	2.82	1.28	0.72	2.67	0	0	0	0
water	mass	=	0.07	(gm)	density	=	0.14	(gm/cc)
	H2O
	G	=	-1964.49	(J)	H	=	-782.22	(J)	S	=	0.77	(J/K)	V	=	0.52	(cc)	Cp	=	0.21	(J/K)
Total	solids	mass	=	0.07	(gm)	density	=	0.14	(gm/cc)
	G	=	-1964.49	(J)	H	=	-782.22	(J)	S	=	0.77	(J/K)	V	=	0.52	(cc)	Cp	=	0.21	(J/K)
Summary	of	all	fractionated	phases:	(total	mass	=	0	grams)
Viscosity	of	the	System:	1.24	(log	10	poise)
System	mass	=	98.43	(gm)	density	=	2.45	(gm/cc)
	G	=	-1.5727e+06	(J)	H	=	-1.12784e+06	(J)	S	=	290.16	(J/K)	V	=	40.18	(cc)	Cp	=	147.04	(J/K)
Oxygen	delta	moles	=	8.56953e-05	delta	grams	=	0.00274215
	G	=	-30.43	(J)	H	=	3.58	(J)	S	=	0.02	(J/K)	V	=	10.92	(cc)	Cp	=	0	(J/K)
**********----------**********
Title:	Dummy	Title
T	=	1250	(C)	P	=	1	(kbars)	log(10)	f	O2	=	-7.68	delta	HM	=	-5.51	NNO	=	-0.68	QFM	=	0	COH	=	2.23	IW	=	3.46
Constraint	Flags:	fO2	path	=	QFM	Fractionate	Solids
Liquid	mass	=	98.37	(gm)	density	=	2.48	(gm/cc)	viscosity	=	1.25	(log	10	poise)	(analysis	in	wt	%)
	G	=	-1.56806e+06	(J)	H	=	-1.12862e+06	(J)	S	=	288.51	(J/K)	V	=	39.61	(cc)	Cp	=	146.84	(J/K)
	SiO2	TiO2	Al2O3	Fe2O3	Cr2O3	FeO	MnO	MgO	NiO	CoO	CaO	Na2O	K2O	P2O5	H2O	CO2	SO3	Cl2O-1	F2O-1
	46.28	3.34	14.08	2.21	0	11.93	0.25	4.78	0	0	9.63	2.82	1.28	0.72	2.68	0	0	0	0
water	mass	=	0.06	(gm)	density	=	0.14	(gm/cc)
	H2O
	G	=	-1753.62	(J)	H	=	-702.93	(J)	S	=	0.69	(J/K)	V	=	0.47	(cc)	Cp	=	0.19	(J/K)
Total	solids	mass	=	0.06	(gm)	density	=	0.14	(gm/cc)
	G	=	-1753.62	(J)	H	=	-702.93	(J)	S	=	0.69	(J/K)	V	=	0.47	(cc)	Cp	=	0.19	(J/K)
Summary	of	all	fractionated	phases:	(total	mass	=	0	grams)
Viscosity	of	the	System:	1.27	(log	10	poise)
System	mass	=	98.43	(gm)	density	=	2.46	(gm/cc)
	G	=	-1.56982e+06	(J)	H	=	-1.12932e+06	(J)	S	=	289.2	(J/K)	V	=	40.08	(cc)	Cp	=	147.03	(J/K)
Oxygen	delta	moles	=	0.000109313	delta	grams	=	0.00349789
	G	=	-38.53	(J)	H	=	4.53	(J)	S	=	0.03	(J/K)	V	=	13.84	(cc)	Cp	=	0	(J/K)
**********----------**********
Title:	Dummy	Title
T	=	1240	(C)	P	=	1	(kbars)	log(10)	f	O2	=	-7.79	delta	HM	=	-5.51	NNO	=	-0.67	QFM	=	0	COH	=	2.22	IW	=	3.47
Constraint	Flags:	fO2	path	=	QFM	Fractionate	Solids
Liquid	mass	=	98.38	(gm)	density	=	2.49	(gm/cc)	viscosity	=	1.29	(log	10	poise)	(analysis	in	wt	%)
	G	=	-1.5654e+06	(J)	H	=	-1.13019e+06	(J)	S	=	287.62	(J/K)	V	=	39.57	(cc)	Cp	=	146.86	(J/K)
	SiO2	TiO2	Al2O3	Fe2O3	Cr2O3	FeO	MnO	MgO	NiO	CoO	CaO	Na2O	K2O	P2O5	H2O	CO2	SO3	Cl2O-1	F2O-1
	46.27	3.34	14.08	2.22	0	11.92	0.25	4.78	0	0	9.63	2.82	1.28	0.72	2.69	0	0	0	0
water	mass	=	0.06	(gm)	density	=	0.14	(gm/cc)
	H2O
	G	=	-1541.13	(J)	H	=	-621.89	(J)	S	=	0.61	(J/K)	V	=	0.41	(cc)	Cp	=	0.17	(J/K)
Total	solids	mass	=	0.06	(gm)	density	=	0.14	(gm/cc)
	G	=	-1541.13	(J)	H	=	-621.89	(J)	S	=	0.61	(J/K)	V	=	0.41	(cc)	Cp	=	0.17	(J/K)
Summary	of	all	fractionated	phases:	(total	mass	=	0	grams)
Viscosity	of	the	System:	1.3	(log	10	poise)
System	mass	=	98.43	(gm)	density	=	2.46	(gm/cc)
	G	=	-1.56694e+06	(J)	H	=	-1.13081e+06	(J)	S	=	288.23	(J/K)	V	=	39.98	(cc)	Cp	=	147.03	(J/K)
Oxygen	delta	moles	=	0.000134167	delta	grams	=	0.0042932
	G	=	-46.94	(J)	H	=	5.51	(J)	S	=	0.03	(J/K)	V	=	16.88	(cc)	Cp	=	0	(J/K)
**********----------**********
Title:	Dummy	Title
T	=	1230	(C)	P	=	1	(kbars)	log(10)	f	O2	=	-7.9	delta	HM	=	-5.51	NNO	=	-0.67	QFM	=	0	COH	=	2.21	IW	=	3.48
Constraint	Flags:	fO2	path	=	QFM	Fractionate	Solids
Liquid	mass	=	98.39	(gm)	density	=	2.49	(gm/cc)	viscosity	=	1.32	(log	10	poise)	(analysis	in	wt	%)
	G	=	-1.56276e+06	(J)	H	=	-1.13176e+06	(J)	S	=	286.73	(J/K)	V	=	39.52	(cc)	Cp	=	146.87	(J/K)
	SiO2	TiO2	Al2O3	Fe2O3	Cr2O3	FeO	MnO	MgO	NiO	CoO	CaO	Na2O	K2O	P2O5	H2O	CO2	SO3	Cl2O-1	F2O-1
	46.27	3.34	14.08	2.23	0	11.92	0.25	4.78	0	0	9.63	2.82	1.28	0.72	2.69	0	0	0	0
water	mass	=	0.05	(gm)	density	=	0.14	(gm/cc)
	H2O
	G	=	-1326.99	(J)	H	=	-539.07	(J)	S	=	0.52	(J/K)	V	=	0.35	(cc)	Cp	=	0.15	(J/K)
Total	solids	mass	=	0.05	(gm)	density	=	0.14	(gm/cc)
	G	=	-1326.99	(J)	H	=	-539.07	(J)	S	=	0.52	(J/K)	V	=	0.35	(cc)	Cp	=	0.15	(J/K)
Summary	of	all	fractionated	phases:	(total	mass	=	0	grams)
Viscosity	of	the	System:	1.33	(log	10	poise)
System	mass	=	98.43	(gm)	density	=	2.47	(gm/cc)
	G	=	-1.56408e+06	(J)	H	=	-1.13229e+06	(J)	S	=	287.26	(J/K)	V	=	39.87	(cc)	Cp	=	147.02	(J/K)
Oxygen	delta	moles	=	0.000160297	delta	grams	=	0.00512933
	G	=	-55.67	(J)	H	=	6.52	(J)	S	=	0.04	(J/K)	V	=	20.03	(cc)	Cp	=	0.01	(J/K)
**********----------**********
Title:	Dummy	Title
T	=	1220	(C)	P	=	1	(kbars)	log(10)	f	O2	=	-8.01	delta	HM	=	-5.51	NNO	=	-0.67	QFM	=	0	COH	=	2.2	IW	=	3.5
Constraint	Flags:	fO2	path	=	QFM	Fractionate	Solids
Liquid	mass	=	98.39	(gm)	density	=	2.49	(gm/cc)	viscosity	=	1.35	(log	10	poise)	(analysis	in	wt	%)
	G	=	-1.56012e+06	(J)	H	=	-1.13333e+06	(J)	S	=	285.83	(J/K)	V	=	39.48	(cc)	Cp	=	146.89	(J/K)
	SiO2	TiO2	Al2O3	Fe2O3	Cr2O3	FeO	MnO	MgO	NiO	CoO	CaO	Na2O	K2O	P2O5	H2O	CO2	SO3	Cl2O-1	F2O-1
	46.26	3.34	14.08	2.24	0	11.91	0.25	4.78	0	0	9.62	2.82	1.28	0.72	2.7	0	0	0	0
water	mass	=	0.04	(gm)	density	=	0.14	(gm/cc)
	H2O
	G	=	-1111.18	(J)	H	=	-454.42	(J)	S	=	0.44	(J/K)	V	=	0.29	(cc)	Cp	=	0.12	(J/K)
Total	solids	mass	=	0.04	(gm)	density	=	0.14	(gm/cc)
	G	=	-1111.18	(J)	H	=	-454.42	(J)	S	=	0.44	(J/K)	V	=	0.29	(cc)	Cp	=	0.12	(J/K)
Summary	of	all	fractionated	phases:	(total	mass	=	0	grams)
Viscosity	of	the	System:	1.37	(log	10	poise)
System	mass	=	98.44	(gm)	density	=	2.48	(gm/cc)
	G	=	-1.56123e+06	(J)	H	=	-1.13378e+06	(J)	S	=	286.27	(J/K)	V	=	39.77	(cc)	Cp	=	147.01	(J/K)
Oxygen	delta	moles	=	0.000187745	delta	grams	=	0.00600762
	G	=	-64.72	(J)	H	=	7.57	(J)	S	=	0.05	(J/K)	V	=	23.31	(cc)	Cp	=	0.01	(J/K)
**********----------**********
Title:	Dummy	Title
T	=	1210	(C)	P	=	1	(kbars)	log(10)	f	O2	=	-8.12	delta	HM	=	-5.52	NNO	=	-0.67	QFM	=	0	COH	=	2.19	IW	=	3.51
Constraint	Flags:	fO2	path	=	QFM	Fractionate	Solids
Liquid	mass	=	98.4	(gm)	density	=	2.5	(gm/cc)	viscosity	=	1.39	(log	10	poise)	(analysis	in	wt	%)
	G	=	-1.5575e+06	(J)	H	=	-1.1349e+06	(J)	S	=	284.93	(J/K)	V	=	39.43	(cc)	Cp	=	146.91	(J/K)
	SiO2	TiO2	Al2O3	Fe2O3	Cr2O3	FeO	MnO	MgO	NiO	CoO	CaO	Na2O	K2O	P2O5	H2O	CO2	SO3	Cl2O-1	F2O-1
	46.26	3.34	14.07	2.25	0	11.9	0.25	4.78	0	0	9.62	2.81	1.28	0.72	2.71	0	0	0	0
water	mass	=	0.03	(gm)	density	=	0.14	(gm/cc)
	H2O
	G	=	-893.67	(J)	H	=	-367.92	(J)	S	=	0.35	(J/K)	V	=	0.23	(cc)	Cp	=	0.1	(J/K)
Total	solids	mass	=	0.03	(gm)	density	=	0.14	(gm/cc)
	G	=	-893.67	(J)	H	=	-367.92	(J)	S	=	0.35	(J/K)	V	=	0.23	(cc)	Cp	=	0.1	(J/K)
Summary	of	all	fractionated	phases:	(total	mass	=	0	grams)
Viscosity	of	the	System:	1.4	(log	10	poise)
System	mass	=	98.44	(gm)	density	=	2.48	(gm/cc)
	G	=	-1.55839e+06	(J)	H	=	-1.13527e+06	(J)	S	=	285.29	(J/K)	V	=	39.67	(cc)	Cp	=	147.01	(J/K)
Oxygen	delta	moles	=	0.000216554	delta	grams	=	0.00692946
	G	=	-74.09	(J)	H	=	8.66	(J)	S	=	0.06	(J/K)	V	=	26.7	(cc)	Cp	=	0.01	(J/K)
**********----------**********
Title:	Dummy	Title
T	=	1200	(C)	P	=	1	(kbars)	log(10)	f	O2	=	-8.23	delta	HM	=	-5.52	NNO	=	-0.66	QFM	=	0	COH	=	2.18	IW	=	3.52
Constraint	Flags:	fO2	path	=	QFM	Fractionate	Solids
Liquid	mass	=	98.41	(gm)	density	=	2.5	(gm/cc)	viscosity	=	1.42	(log	10	poise)	(analysis	in	wt	%)
	G	=	-1.55488e+06	(J)	H	=	-1.13645e+06	(J)	S	=	284.04	(J/K)	V	=	39.39	(cc)	Cp	=	143.8	(J/K)
	SiO2	TiO2	Al2O3	Fe2O3	Cr2O3	FeO	MnO	MgO	NiO	CoO	CaO	Na2O	K2O	P2O5	H2O	CO2	SO3	Cl2O-1	F2O-1
	46.25	3.34	14.07	2.26	0	11.89	0.25	4.78	0	0	9.62	2.81	1.28	0.72	2.72	0	0	0	0
water	mass	=	0.03	(gm)	density	=	0.15	(gm/cc)
	H2O
	G	=	-674.44	(J)	H	=	-279.53	(J)	S	=	0.27	(J/K)	V	=	0.18	(cc)	Cp	=	0.08	(J/K)
Total	solids	mass	=	0.03	(gm)	density	=	0.15	(gm/cc)
	G	=	-674.44	(J)	H	=	-279.53	(J)	S	=	0.27	(J/K)	V	=	0.18	(cc)	Cp	=	0.08	(J/K)
Summary	of	all	fractionated	phases:	(total	mass	=	0	grams)
Viscosity	of	the	System:	1.43	(log	10	poise)
System	mass	=	98.44	(gm)	density	=	2.49	(gm/cc)
	G	=	-1.55556e+06	(J)	H	=	-1.13673e+06	(J)	S	=	284.31	(J/K)	V	=	39.57	(cc)	Cp	=	143.88	(J/K)
Oxygen	delta	moles	=	0.000246769	delta	grams	=	0.00789631
	G	=	-83.79	(J)	H	=	9.77	(J)	S	=	0.06	(J/K)	V	=	30.22	(cc)	Cp	=	0.01	(J/K)
**********----------**********
Title:	Dummy	Title
T	=	1190	(C)	P	=	1	(kbars)	log(10)	f	O2	=	-8.34	delta	HM	=	-5.52	NNO	=	-0.66	QFM	=	0	COH	=	2.17	IW	=	3.53
Constraint	Flags:	fO2	path	=	QFM	Fractionate	Solids
Liquid	mass	=	98.42	(gm)	density	=	2.5	(gm/cc)	viscosity	=	1.46	(log	10	poise)	(analysis	in	wt	%)
	G	=	-1.55229e+06	(J)	H	=	-1.138e+06	(J)	S	=	283.14	(J/K)	V	=	39.35	(cc)	Cp	=	143.81	(J/K)
	SiO2	TiO2	Al2O3	Fe2O3	Cr2O3	FeO	MnO	MgO	NiO	CoO	CaO	Na2O	K2O	P2O5	H2O	CO2	SO3	Cl2O-1	F2O-1
	46.25	3.34	14.07	2.27	0	11.88	0.25	4.78	0	0	9.62	2.81	1.28	0.72	2.73	0	0	0	0
water	mass	=	0.02	(gm)	density	=	0.15	(gm/cc)
	H2O
	G	=	-453.47	(J)	H	=	-189.2	(J)	S	=	0.18	(J/K)	V	=	0.12	(cc)	Cp	=	0.05	(J/K)
Total	solids	mass	=	0.02	(gm)	density	=	0.15	(gm/cc)
	G	=	-453.47	(J)	H	=	-189.2	(J)	S	=	0.18	(J/K)	V	=	0.12	(cc)	Cp	=	0.05	(J/K)
Summary	of	all	fractionated	phases:	(total	mass	=	0	grams)
Viscosity	of	the	System:	1.46	(log	10	poise)
System	mass	=	98.44	(gm)	density	=	2.49	(gm/cc)
	G	=	-1.55274e+06	(J)	H	=	-1.13819e+06	(J)	S	=	283.33	(J/K)	V	=	39.46	(cc)	Cp	=	143.86	(J/K)
Oxygen	delta	moles	=	0.000278438	delta	grams	=	0.00890969
	G	=	-93.83	(J)	H	=	10.93	(J)	S	=	0.07	(J/K)	V	=	33.87	(cc)	Cp	=	0.01	(J/K)
**********----------**********
Title:	Dummy	Title
T	=	1180	(C)	P	=	1	(kbars)	log(10)	f	O2	=	-8.45	delta	HM	=	-5.52	NNO	=	-0.66	QFM	=	0	COH	=	2.16	IW	=	3.54
Constraint	Flags:	fO2	path	=	QFM	Fractionate	Solids
Liquid	mass	=	98.43	(gm)	density	=	2.5	(gm/cc)	viscosity	=	1.49	(log	10	poise)	(analysis	in	wt	%)
	G	=	-1.5497e+06	(J)	H	=	-1.13955e+06	(J)	S	=	282.25	(J/K)	V	=	39.3	(cc)	Cp	=	143.82	(J/K)
	SiO2	TiO2	Al2O3	Fe2O3	Cr2O3	FeO	MnO	MgO	NiO	CoO	CaO	Na2O	K2O	P2O5	H2O	CO2	SO3	Cl2O-1	F2O-1
	46.25	3.34	14.07	2.28	0	11.87	0.25	4.77	0	0	9.62	2.81	1.28	0.72	2.73	0	0	0	0
water	mass	=	0.01	(gm)	density	=	0.15	(gm/cc)
	H2O
	G	=	-230.73	(J)	H	=	-96.92	(J)	S	=	0.09	(J/K)	V	=	0.06	(cc)	Cp	=	0.03	(J/K)
Total	solids	mass	=	0.01	(gm)	density	=	0.15	(gm/cc)
	G	=	-230.73	(J)	H	=	-96.92	(J)	S	=	0.09	(J/K)	V	=	0.06	(cc)	Cp	=	0.03	(J/K)
Summary	of	all	fractionated	phases:	(total	mass	=	0	grams)
Viscosity	of	the	System:	1.49	(log	10	poise)
System	mass	=	98.44	(gm)	density	=	2.5	(gm/cc)
	G	=	-1.54993e+06	(J)	H	=	-1.13965e+06	(J)	S	=	282.34	(J/K)	V	=	39.36	(cc)	Cp	=	143.85	(J/K)
Oxygen	delta	moles	=	0.000311611	delta	grams	=	0.00997118
	G	=	-104.21	(J)	H	=	12.11	(J)	S	=	0.08	(J/K)	V	=	37.65	(cc)	Cp	=	0.01	(J/K)
**********----------**********
Title:	Dummy	Title
T	=	1170	(C)	P	=	1	(kbars)	log(10)	f	O2	=	-8.57	delta	HM	=	-5.53	NNO	=	-0.66	QFM	=	0	COH	=	2.15	IW	=	3.55
Constraint	Flags:	fO2	path	=	QFM	Fractionate	Solids
Liquid	mass	=	98.44	(gm)	density	=	2.51	(gm/cc)	viscosity	=	1.53	(log	10	poise)	(analysis	in	wt	%)
	G	=	-1.54712e+06	(J)	H	=	-1.1411e+06	(J)	S	=	281.34	(J/K)	V	=	39.26	(cc)	Cp	=	143.83	(J/K)
	SiO2	TiO2	Al2O3	Fe2O3	Cr2O3	FeO	MnO	MgO	NiO	CoO	CaO	Na2O	K2O	P2O5	H2O	CO2	SO3	Cl2O-1	F2O-1
	46.24	3.34	14.07	2.29	0	11.85	0.25	4.77	0	0	9.62	2.81	1.28	0.72	2.74	0	0	0	0
water	mass	=	0	(gm)	density	=	0.15	(gm/cc)
	H2O
	G	=	-6.2	(J)	H	=	-2.62	(J)	S	=	0	(J/K)	V	=	0	(cc)	Cp	=	0	(J/K)
Total	solids	mass	=	0	(gm)	density	=	0.15	(gm/cc)
	G	=	-6.2	(J)	H	=	-2.62	(J)	S	=	0	(J/K)	V	=	0	(cc)	Cp	=	0	(J/K)
Summary	of	all	fractionated	phases:	(total	mass	=	0	grams)
Viscosity	of	the	System:	1.53	(log	10	poise)
System	mass	=	98.44	(gm)	density	=	2.51	(gm/cc)
	G	=	-1.54713e+06	(J)	H	=	-1.14111e+06	(J)	S	=	281.35	(J/K)	V	=	39.26	(cc)	Cp	=	143.83	(J/K)
Oxygen	delta	moles	=	0.00034634	delta	grams	=	0.0110825
	G	=	-114.93	(J)	H	=	13.34	(J)	S	=	0.09	(J/K)	V	=	41.56	(cc)	Cp	=	0.01	(J/K)
**********----------**********
Title:	Dummy	Title
T	=	1160	(C)	P	=	1	(kbars)	log(10)	f	O2	=	-8.69	delta	HM	=	-5.53	NNO	=	-0.65	QFM	=	0	COH	=	2.14	IW	=	3.57
Constraint	Flags:	fO2	path	=	QFM	Fractionate	Solids
Liquid	mass	=	98.44	(gm)	density	=	2.51	(gm/cc)	viscosity	=	1.56	(log	10	poise)	(analysis	in	wt	%)
	G	=	-1.54434e+06	(J)	H	=	-1.14256e+06	(J)	S	=	280.35	(J/K)	V	=	39.2	(cc)	Cp	=	143.82	(J/K)
	SiO2	TiO2	Al2O3	Fe2O3	Cr2O3	FeO	MnO	MgO	NiO	CoO	CaO	Na2O	K2O	P2O5	H2O	CO2	SO3	Cl2O-1	F2O-1
	46.24	3.34	14.07	2.3	0	11.84	0.25	4.77	0	0	9.62	2.81	1.28	0.72	2.74	0	0	0	0
Total	solids	mass	=	0	(gm)	density	=	0	(gm/cc)
	G	=	0	(J)	H	=	0	(J)	S	=	0	(J/K)	V	=	0	(cc)	Cp	=	0	(J/K)
Summary	of	all	fractionated	phases:	(total	mass	=	0	grams)
Viscosity	of	the	System:	1.56	(log	10	poise)
System	mass	=	98.44	(gm)	density	=	2.51	(gm/cc)
	G	=	-1.54434e+06	(J)	H	=	-1.14256e+06	(J)	S	=	280.35	(J/K)	V	=	39.2	(cc)	Cp	=	143.82	(J/K)
Oxygen	delta	moles	=	0.000382926	delta	grams	=	0.0122532
	G	=	-126.09	(J)	H	=	14.61	(J)	S	=	0.1	(J/K)	V	=	45.63	(cc)	Cp	=	0.01	(J/K)
**********----------**********
Title:	Dummy	Title
T	=	1150	(C)	P	=	1	(kbars)	log(10)	f	O2	=	-8.81	delta	HM	=	-5.53	NNO	=	-0.65	QFM	=	0	COH	=	2.13	IW	=	3.58
Constraint	Flags:	fO2	path	=	QFM	Fractionate	Solids
Liquid	mass	=	98.44	(gm)	density	=	2.52	(gm/cc)	viscosity	=	1.6	(log	10	poise)	(analysis	in	wt	%)
	G	=	-1.54157e+06	(J)	H	=	-1.14402e+06	(J)	S	=	279.34	(J/K)	V	=	39.14	(cc)	Cp	=	143.8	(J/K)
	SiO2	TiO2	Al2O3	Fe2O3	Cr2O3	FeO	MnO	MgO	NiO	CoO	CaO	Na2O	K2O	P2O5	H2O	CO2	SO3	Cl2O-1	F2O-1
	46.24	3.34	14.07	2.31	0	11.83	0.25	4.77	0	0	9.62	2.81	1.28	0.72	2.74	0	0	0	0
Total	solids	mass	=	0	(gm)	density	=	0	(gm/cc)
	G	=	0	(J)	H	=	0	(J)	S	=	0	(J/K)	V	=	0	(cc)	Cp	=	0	(J/K)
Summary	of	all	fractionated	phases:	(total	mass	=	0	grams)
Viscosity	of	the	System:	1.6	(log	10	poise)
System	mass	=	98.44	(gm)	density	=	2.52	(gm/cc)
	G	=	-1.54157e+06	(J)	H	=	-1.14402e+06	(J)	S	=	279.34	(J/K)	V	=	39.14	(cc)	Cp	=	143.8	(J/K)
Oxygen	delta	moles	=	0.000421193	delta	grams	=	0.0134777
	G	=	-137.61	(J)	H	=	15.91	(J)	S	=	0.11	(J/K)	V	=	49.84	(cc)	Cp	=	0.02	(J/K)
**********----------**********
Title:	Dummy	Title
T	=	1140	(C)	P	=	1	(kbars)	log(10)	f	O2	=	-8.93	delta	HM	=	-5.53	NNO	=	-0.65	QFM	=	0	COH	=	2.12	IW	=	3.59
Constraint	Flags:	fO2	path	=	QFM	Fractionate	Solids
Liquid	mass	=	98.44	(gm)	density	=	2.52	(gm/cc)	viscosity	=	1.64	(log	10	poise)	(analysis	in	wt	%)
	G	=	-1.5388e+06	(J)	H	=	-1.14548e+06	(J)	S	=	278.33	(J/K)	V	=	39.08	(cc)	Cp	=	143.79	(J/K)
	SiO2	TiO2	Al2O3	Fe2O3	Cr2O3	FeO	MnO	MgO	NiO	CoO	CaO	Na2O	K2O	P2O5	H2O	CO2	SO3	Cl2O-1	F2O-1
	46.24	3.34	14.07	2.32	0	11.82	0.25	4.77	0	0	9.62	2.81	1.28	0.72	2.74	0	0	0	0
Total	solids	mass	=	0	(gm)	density	=	0	(gm/cc)
	G	=	0	(J)	H	=	0	(J)	S	=	0	(J/K)	V	=	0	(cc)	Cp	=	0	(J/K)
Summary	of	all	fractionated	phases:	(total	mass	=	0	grams)
Viscosity	of	the	System:	1.64	(log	10	poise)
System	mass	=	98.44	(gm)	density	=	2.52	(gm/cc)
	G	=	-1.5388e+06	(J)	H	=	-1.14548e+06	(J)	S	=	278.33	(J/K)	V	=	39.08	(cc)	Cp	=	143.79	(J/K)
Oxygen	delta	moles	=	0.000461193	delta	grams	=	0.0147576
	G	=	-149.5	(J)	H	=	17.26	(J)	S	=	0.12	(J/K)	V	=	54.19	(cc)	Cp	=	0.02	(J/K)
**********----------**********
Title:	Dummy	Title
T	=	1130	(C)	P	=	1	(kbars)	log(10)	f	O2	=	-9.05	delta	HM	=	-5.54	NNO	=	-0.64	QFM	=	0	COH	=	2.11	IW	=	3.6
Constraint	Flags:	fO2	path	=	QFM	Fractionate	Solids
Liquid	mass	=	98.45	(gm)	density	=	2.52	(gm/cc)	viscosity	=	1.68	(log	10	poise)	(analysis	in	wt	%)
	G	=	-1.53605e+06	(J)	H	=	-1.14694e+06	(J)	S	=	277.31	(J/K)	V	=	39.03	(cc)	Cp	=	143.77	(J/K)
	SiO2	TiO2	Al2O3	Fe2O3	Cr2O3	FeO	MnO	MgO	NiO	CoO	CaO	Na2O	K2O	P2O5	H2O	CO2	SO3	Cl2O-1	F2O-1
	46.24	3.34	14.07	2.34	0	11.81	0.25	4.77	0	0	9.62	2.81	1.28	0.72	2.74	0	0	0	0
Total	solids	mass	=	0	(gm)	density	=	0	(gm/cc)
	G	=	0	(J)	H	=	0	(J)	S	=	0	(J/K)	V	=	0	(cc)	Cp	=	0	(J/K)
Summary	of	all	fractionated	phases:	(total	mass	=	0	grams)
Viscosity	of	the	System:	1.68	(log	10	poise)
System	mass	=	98.45	(gm)	density	=	2.52	(gm/cc)
	G	=	-1.53605e+06	(J)	H	=	-1.14694e+06	(J)	S	=	277.31	(J/K)	V	=	39.03	(cc)	Cp	=	143.77	(J/K)
Oxygen	delta	moles	=	0.000502989	delta	grams	=	0.016095
	G	=	-161.76	(J)	H	=	18.64	(J)	S	=	0.13	(J/K)	V	=	58.68	(cc)	Cp	=	0.02	(J/K)
**********----------**********
Title:	Dummy	Title
T	=	1120	(C)	P	=	1	(kbars)	log(10)	f	O2	=	-9.18	delta	HM	=	-5.54	NNO	=	-0.64	QFM	=	0	COH	=	2.09	IW	=	3.62
Constraint	Flags:	fO2	path	=	QFM	Fractionate	Solids
Liquid	mass	=	97.62	(gm)	density	=	2.52	(gm/cc)	viscosity	=	1.76	(log	10	poise)	(analysis	in	wt	%)
	G	=	-1.52548e+06	(J)	H	=	-1.14343e+06	(J)	S	=	274.23	(J/K)	V	=	38.79	(cc)	Cp	=	142.61	(J/K)
	SiO2	TiO2	Al2O3	Fe2O3	Cr2O3	FeO	MnO	MgO	NiO	CoO	CaO	Na2O	K2O	P2O5	H2O	CO2	SO3	Cl2O-1	F2O-1
	46.63	3.17	14.15	2.3	0	11.43	0.26	4.74	0	0	9.7	2.84	1.29	0.73	2.77	0	0	0	0
spinel	mass	=	0.84	(gm)	density	=	4.46	(gm/cc)	(analysis	in	mole	%)
	Fe''1.13Mg0.47Fe'''0.62Al0.19Cr0.00Ti0.59O4
	G	=	-8057.42	(J)	H	=	-5522.71	(J)	S	=	1.82	(J/K)	V	=	0.19	(cc)	Cp	=	0.82	(J/K)
	chromite	hercynite	magnetite	spinel	ulvospinel
	0	-37.28	31.22	46.63	59.44
Total	solids	mass	=	0.84	(gm)	density	=	4.46	(gm/cc)
	G	=	-8057.42	(J)	H	=	-5522.71	(J)	S	=	1.82	(J/K)	V	=	0.19	(cc)	Cp	=	0.82	(J/K)
Summary	of	all	fractionated	phases:	(total	mass	=	0	grams)
Viscosity	of	the	System:	1.77	(log	10	poise)
System	mass	=	98.46	(gm)	density	=	2.53	(gm/cc)
	G	=	-1.53354e+06	(J)	H	=	-1.14896e+06	(J)	S	=	276.05	(J/K)	V	=	38.98	(cc)	Cp	=	143.43	(J/K)
Oxygen	delta	moles	=	0.000967526	delta	grams	=	0.0309597
	G	=	-308.69	(J)	H	=	35.5	(J)	S	=	0.25	(J/K)	V	=	112.07	(cc)	Cp	=	0.04	(J/K)
**********----------**********
Title:	Dummy	Title
T	=	1110	(C)	P	=	1	(kbars)	log(10)	f	O2	=	-9.3	delta	HM	=	-5.54	NNO	=	-0.64	QFM	=	0	COH	=	2.08	IW	=	3.63
Constraint	Flags:	fO2	path	=	QFM	Fractionate	Solids
Liquid	mass	=	96.51	(gm)	density	=	2.51	(gm/cc)	viscosity	=	1.85	(log	10	poise)	(analysis	in	wt	%)
	G	=	-1.51232e+06	(J)	H	=	-1.13824e+06	(J)	S	=	270.46	(J/K)	V	=	38.49	(cc)	Cp	=	141.06	(J/K)
	SiO2	TiO2	Al2O3	Fe2O3	Cr2O3	FeO	MnO	MgO	NiO	CoO	CaO	Na2O	K2O	P2O5	H2O	CO2	SO3	Cl2O-1	F2O-1
	47.17	2.94	14.26	2.24	0	10.92	0.26	4.69	0	0	9.81	2.87	1.31	0.74	2.8	0	0	0	0
spinel	mass	=	1.13	(gm)	density	=	4.47	(gm/cc)	(analysis	in	mole	%)
	Fe''1.12Mg0.46Fe'''0.64Al0.19Cr0.00Ti0.58O4
	G	=	-10798.4	(J)	H	=	-7418.77	(J)	S	=	2.44	(J/K)	V	=	0.25	(cc)	Cp	=	1.1	(J/K)
	chromite	hercynite	magnetite	spinel	ulvospinel
	0	-36.56	32.16	46.03	58.37
Total	solids	mass	=	1.13	(gm)	density	=	4.47	(gm/cc)
	G	=	-10798.4	(J)	H	=	-7418.77	(J)	S	=	2.44	(J/K)	V	=	0.25	(cc)	Cp	=	1.1	(J/K)
Summary	of	all	fractionated	phases:	(total	mass	=	0.84	grams)
spinel	mass	=	0.84	(gm)	density	=	4.46	(gm/cc)	(analysis	in	mole	%)
	Fe''1.13Mg0.47Fe'''0.62Al0.19Cr0.00Ti0.59O4
	G	=	-8019.48	(J)	H	=	-5517.27	(J)	S	=	1.81	(J/K)	V	=	0.19	(cc)	Cp	=	0.81	(J/K)
	chromite	hercynite	magnetite	spinel	ulvospinel
	0	-37.28	31.22	46.63	59.44
Viscosity	of	the	System:	1.87	(log	10	poise)
System	mass	=	98.48	(gm)	density	=	2.53	(gm/cc)
	G	=	-1.53114e+06	(J)	H	=	-1.15118e+06	(J)	S	=	274.71	(J/K)	V	=	38.93	(cc)	Cp	=	142.97	(J/K)
Oxygen	delta	moles	=	0.00159373	delta	grams	=	0.0509974
	G	=	-504.41	(J)	H	=	57.9	(J)	S	=	0.41	(J/K)	V	=	183.28	(cc)	Cp	=	0.06	(J/K)
**********----------**********
Title:	Dummy	Title
T	=	1100	(C)	P	=	1	(kbars)	log(10)	f	O2	=	-9.43	delta	HM	=	-5.54	NNO	=	-0.63	QFM	=	0	COH	=	2.07	IW	=	3.64
Constraint	Flags:	fO2	path	=	QFM	Fractionate	Solids
Liquid	mass	=	95.46	(gm)	density	=	2.5	(gm/cc)	viscosity	=	1.95	(log	10	poise)	(analysis	in	wt	%)
	G	=	-1.49986e+06	(J)	H	=	-1.13344e+06	(J)	S	=	266.85	(J/K)	V	=	38.2	(cc)	Cp	=	139.6	(J/K)
	SiO2	TiO2	Al2O3	Fe2O3	Cr2O3	FeO	MnO	MgO	NiO	CoO	CaO	Na2O	K2O	P2O5	H2O	CO2	SO3	Cl2O-1	F2O-1
	47.68	2.73	14.36	2.19	0	10.42	0.26	4.64	0	0	9.92	2.9	1.32	0.74	2.83	0	0	0	0
spinel	mass	=	1.07	(gm)	density	=	4.47	(gm/cc)	(analysis	in	mole	%)
	Fe''1.12Mg0.45Fe'''0.66Al0.19Cr0.00Ti0.57O4
	G	=	-10123.5	(J)	H	=	-6971.13	(J)	S	=	2.3	(J/K)	V	=	0.24	(cc)	Cp	=	1.03	(J/K)
	chromite	hercynite	magnetite	spinel	ulvospinel
	0	-35.82	33.16	45.42	57.24
Total	solids	mass	=	1.07	(gm)	density	=	4.47	(gm/cc)
	G	=	-10123.5	(J)	H	=	-6971.13	(J)	S	=	2.3	(J/K)	V	=	0.24	(cc)	Cp	=	1.03	(J/K)
Summary	of	all	fractionated	phases:	(total	mass	=	1.97	grams)
spinel	mass	=	1.97	(gm)	density	=	4.47	(gm/cc)	(analysis	in	mole	%)
	Fe''1.13Mg0.46Fe'''0.64Al0.19Cr0.00Ti0.59O4
	G	=	-18755.8	(J)	H	=	-12941.6	(J)	S	=	4.23	(J/K)	V	=	0.44	(cc)	Cp	=	1.91	(J/K)
	chromite	hercynite	magnetite	spinel	ulvospinel
	0	-36.87	31.76	46.29	58.83
Viscosity	of	the	System:	1.98	(log	10	poise)
System	mass	=	98.5	(gm)	density	=	2.53	(gm/cc)
	G	=	-1.52874e+06	(J)	H	=	-1.15335e+06	(J)	S	=	273.38	(J/K)	V	=	38.88	(cc)	Cp	=	142.54	(J/K)
Oxygen	delta	moles	=	0.00220165	delta	grams	=	0.0704502
	G	=	-691.2	(J)	H	=	79.19	(J)	S	=	0.56	(J/K)	V	=	251.36	(cc)	Cp	=	0.08	(J/K)
**********----------**********
Title:	Dummy	Title
T	=	1090	(C)	P	=	1	(kbars)	log(10)	f	O2	=	-9.56	delta	HM	=	-5.55	NNO	=	-0.63	QFM	=	0	COH	=	2.06	IW	=	3.65
Constraint	Flags:	fO2	path	=	QFM	Fractionate	Solids
Liquid	mass	=	94.47	(gm)	density	=	2.49	(gm/cc)	viscosity	=	2.04	(log	10	poise)	(analysis	in	wt	%)
	G	=	-1.48806e+06	(J)	H	=	-1.129e+06	(J)	S	=	263.4	(J/K)	V	=	37.93	(cc)	Cp	=	138.22	(J/K)
	SiO2	TiO2	Al2O3	Fe2O3	Cr2O3	FeO	MnO	MgO	NiO	CoO	CaO	Na2O	K2O	P2O5	H2O	CO2	SO3	Cl2O-1	F2O-1
	48.18	2.53	14.46	2.13	0	9.94	0.26	4.59	0	0	10.02	2.93	1.33	0.75	2.86	0	0	0	0
spinel	mass	=	1.01	(gm)	density	=	4.48	(gm/cc)	(analysis	in	mole	%)
	Fe''1.11Mg0.45Fe'''0.68Al0.19Cr0.00Ti0.56O4
	G	=	-9492.77	(J)	H	=	-6551.69	(J)	S	=	2.16	(J/K)	V	=	0.22	(cc)	Cp	=	0.97	(J/K)
	chromite	hercynite	magnetite	spinel	ulvospinel
	0	-35.06	34.21	44.8	56.04
Total	solids	mass	=	1.01	(gm)	density	=	4.48	(gm/cc)
	G	=	-9492.77	(J)	H	=	-6551.69	(J)	S	=	2.16	(J/K)	V	=	0.22	(cc)	Cp	=	0.97	(J/K)
Summary	of	all	fractionated	phases:	(total	mass	=	3.04	grams)
spinel	mass	=	3.04	(gm)	density	=	4.47	(gm/cc)	(analysis	in	mole	%)
	Fe''1.12Mg0.46Fe'''0.64Al0.19Cr0.00Ti0.58O4
	G	=	-28794.5	(J)	H	=	-19928.5	(J)	S	=	6.5	(J/K)	V	=	0.68	(cc)	Cp	=	2.94	(J/K)
	chromite	hercynite	magnetite	spinel	ulvospinel
	0	-36.5	32.25	45.98	58.27
Viscosity	of	the	System:	2.08	(log	10	poise)
System	mass	=	98.52	(gm)	density	=	2.54	(gm/cc)
	G	=	-1.52635e+06	(J)	H	=	-1.15548e+06	(J)	S	=	272.06	(J/K)	V	=	38.83	(cc)	Cp	=	142.13	(J/K)
Oxygen	delta	moles	=	0.00279264	delta	grams	=	0.0893611
	G	=	-869.63	(J)	H	=	99.44	(J)	S	=	0.71	(J/K)	V	=	316.51	(cc)	Cp	=	0.1	(J/K)
**********----------**********
Title:	Dummy	Title
T	=	1080	(C)	P	=	1	(kbars)	log(10)	f	O2	=	-9.69	delta	HM	=	-5.55	NNO	=	-0.63	QFM	=	0	COH	=	2.05	IW	=	3.67
Constraint	Flags:	fO2	path	=	QFM	Fractionate	Solids
Liquid	mass	=	92.27	(gm)	density	=	2.48	(gm/cc)	viscosity	=	2.14	(log	10	poise)	(analysis	in	wt	%)
	G	=	-1.45802e+06	(J)	H	=	-1.11042e+06	(J)	S	=	256.88	(J/K)	V	=	37.25	(cc)	Cp	=	134.98	(J/K)
	SiO2	TiO2	Al2O3	Fe2O3	Cr2O3	FeO	MnO	MgO	NiO	CoO	CaO	Na2O	K2O	P2O5	H2O	CO2	SO3	Cl2O-1	F2O-1
	48.78	2.3	14.67	2.05	0	9.42	0.27	4.44	0	0	10	3	1.37	0.77	2.93	0	0	0	0
clinopyroxene	mass	=	1.09	(gm)	density	=	3.29	(gm/cc)	(analysis	in	mole	%)
	cpx	Na0.01Ca0.88Fe''0.18Mg0.75Fe'''0.07Ti0.07Al0.26Si1.76O6
	G	=	-17154.1	(J)	H	=	-13862.1	(J)	S	=	2.43	(J/K)	V	=	0.33	(cc)	Cp	=	1.26	(J/K)
	diopside	clinoenstatit	hedenbergite	alumino-buffo	buffonite	essenite	jadeite
	46.85	10.58	17.6	16.34	-1.44	8.77	1.29
spinel	mass	=	1.14	(gm)	density	=	4.49	(gm/cc)	(analysis	in	mole	%)
	Fe''1.11Mg0.43Fe'''0.71Al0.20Cr0.00Ti0.55O4
	G	=	-10676	(J)	H	=	-7378.32	(J)	S	=	2.44	(J/K)	V	=	0.25	(cc)	Cp	=	1.1	(J/K)
	chromite	hercynite	magnetite	spinel	ulvospinel
	0	-33.58	35.48	43.48	54.62
Total	solids	mass	=	2.23	(gm)	density	=	3.82	(gm/cc)
	G	=	-27830.1	(J)	H	=	-21240.4	(J)	S	=	4.87	(J/K)	V	=	0.59	(cc)	Cp	=	2.36	(J/K)
Summary	of	all	fractionated	phases:	(total	mass	=	4.04	grams)
spinel	mass	=	4.04	(gm)	density	=	4.47	(gm/cc)	(analysis	in	mole	%)
	Fe''1.12Mg0.46Fe'''0.65Al0.19Cr0.00Ti0.58O4
	G	=	-38181.3	(J)	H	=	-26505.8	(J)	S	=	8.63	(J/K)	V	=	0.9	(cc)	Cp	=	3.9	(J/K)
	chromite	hercynite	magnetite	spinel	ulvospinel
	0	-36.14	32.74	45.69	57.72
Viscosity	of	the	System:	2.21	(log	10	poise)
System	mass	=	98.54	(gm)	density	=	2.54	(gm/cc)
	G	=	-1.52403e+06	(J)	H	=	-1.15817e+06	(J)	S	=	270.38	(J/K)	V	=	38.74	(cc)	Cp	=	141.25	(J/K)
Oxygen	delta	moles	=	0.00349542	delta	grams	=	0.111849
	G	=	-1079.58	(J)	H	=	123.2	(J)	S	=	0.89	(J/K)	V	=	393.25	(cc)	Cp	=	0.13	(J/K)
**********----------**********
Title:	Dummy	Title
T	=	1070	(C)	P	=	1	(kbars)	log(10)	f	O2	=	-9.83	delta	HM	=	-5.55	NNO	=	-0.62	QFM	=	0	COH	=	2.04	IW	=	3.68
Constraint	Flags:	fO2	path	=	QFM	Fractionate	Solids
Liquid	mass	=	86.35	(gm)	density	=	2.45	(gm/cc)	viscosity	=	2.27	(log	10	poise)	(analysis	in	wt	%)
	G	=	-1.37246e+06	(J)	H	=	-1.0487e+06	(J)	S	=	241.04	(J/K)	V	=	35.31	(cc)	Cp	=	126.11	(J/K)
	SiO2	TiO2	Al2O3	Fe2O3	Cr2O3	FeO	MnO	MgO	NiO	CoO	CaO	Na2O	K2O	P2O5	H2O	CO2	SO3	Cl2O-1	F2O-1
	49.7	1.97	15.28	1.93	0	8.75	0.29	3.92	0	0	9.56	3.2	1.46	0.82	3.13	0	0	0	0
clinopyroxene	mass	=	4.44	(gm)	density	=	3.3	(gm/cc)	(analysis	in	mole	%)
	cpx	Na0.01Ca0.88Fe''0.18Mg0.74Fe'''0.07Ti0.07Al0.27Si1.76O6
	G	=	-69686.4	(J)	H	=	-56425.6	(J)	S	=	9.87	(J/K)	V	=	1.35	(cc)	Cp	=	5.13	(J/K)
	diopside	clinoenstatit	hedenbergite	alumino-buffo	buffonite	essenite	jadeite
	45.92	10.5	18.27	16.54	-1.69	9.13	1.33
spinel	mass	=	1.52	(gm)	density	=	4.52	(gm/cc)	(analysis	in	mole	%)
	Fe''1.13Mg0.40Fe'''0.75Al0.20Cr0.00Ti0.53O4
	G	=	-13930.5	(J)	H	=	-9612.55	(J)	S	=	3.21	(J/K)	V	=	0.34	(cc)	Cp	=	1.45	(J/K)
	chromite	hercynite	magnetite	spinel	ulvospinel
	0	-29.82	37.33	39.92	52.58
Total	solids	mass	=	5.95	(gm)	density	=	3.54	(gm/cc)
	G	=	-83617	(J)	H	=	-66038.1	(J)	S	=	13.09	(J/K)	V	=	1.68	(cc)	Cp	=	6.58	(J/K)
Summary	of	all	fractionated	phases:	(total	mass	=	6.27	grams)
clinopyroxene	mass	=	1.09	(gm)	density	=	3.29	(gm/cc)	(analysis	in	mole	%)
	cpx	Na0.01Ca0.88Fe''0.18Mg0.75Fe'''0.07Ti0.07Al0.26Si1.76O6
	G	=	-17094.6	(J)	H	=	-13846.1	(J)	S	=	2.42	(J/K)	V	=	0.33	(cc)	Cp	=	1.26	(J/K)
	diopside	clinoenstatit	hedenbergite	alumino-buffo	buffonite	essenite	jadeite
	46.85	10.58	17.6	16.34	-1.44	8.77	1.29
spinel	mass	=	5.18	(gm)	density	=	4.48	(gm/cc)	(analysis	in	mole	%)
	Fe''1.12Mg0.45Fe'''0.67Al0.19Cr0.00Ti0.57O4
	G	=	-48727.6	(J)	H	=	-33920.6	(J)	S	=	11.02	(J/K)	V	=	1.16	(cc)	Cp	=	5	(J/K)
	chromite	hercynite	magnetite	spinel	ulvospinel
	0	-35.58	33.34	45.21	57.04
Viscosity	of	the	System:	2.43	(log	10	poise)
System	mass	=	98.57	(gm)	density	=	2.56	(gm/cc)
	G	=	-1.5219e+06	(J)	H	=	-1.16251e+06	(J)	S	=	267.57	(J/K)	V	=	38.48	(cc)	Cp	=	138.94	(J/K)
Oxygen	delta	moles	=	0.00450294	delta	grams	=	0.144089
	G	=	-1379.32	(J)	H	=	157.08	(J)	S	=	1.14	(J/K)	V	=	502.86	(cc)	Cp	=	0.16	(J/K)
**********----------**********
Title:	Dummy	Title
T	=	1060	(C)	P	=	1	(kbars)	log(10)	f	O2	=	-9.96	delta	HM	=	-5.55	NNO	=	-0.62	QFM	=	0	COH	=	2.02	IW	=	3.7
Constraint	Flags:	fO2	path	=	QFM	Fractionate	Solids
Liquid	mass	=	81.58	(gm)	density	=	2.42	(gm/cc)	viscosity	=	2.41	(log	10	poise)	(analysis	in	wt	%)
	G	=	-1.30268e+06	(J)	H	=	-998746	(J)	S	=	227.98	(J/K)	V	=	33.71	(cc)	Cp	=	118.92	(J/K)
	SiO2	TiO2	Al2O3	Fe2O3	Cr2O3	FeO	MnO	MgO	NiO	CoO	CaO	Na2O	K2O	P2O5	H2O	CO2	SO3	Cl2O-1	F2O-1
	50.51	1.7	15.82	1.82	0	8.17	0.31	3.47	0	0	9.13	3.37	1.54	0.87	3.28	0	0	0	0
clinopyroxene	mass	=	3.64	(gm)	density	=	3.3	(gm/cc)	(analysis	in	mole	%)
	cpx	Na0.01Ca0.88Fe''0.19Mg0.73Fe'''0.08Ti0.07Al0.28Si1.76O6
	G	=	-56993.5	(J)	H	=	-46239.5	(J)	S	=	8.07	(J/K)	V	=	1.1	(cc)	Cp	=	4.2	(J/K)
	diopside	clinoenstatit	hedenbergite	alumino-buffo	buffonite	essenite	jadeite
	44.94	10.4	18.97	16.74	-1.96	9.53	1.39
spinel	mass	=	1.14	(gm)	density	=	4.55	(gm/cc)	(analysis	in	mole	%)
	Fe''1.14Mg0.37Fe'''0.79Al0.21Cr0.00Ti0.50O4
	G	=	-10289.5	(J)	H	=	-7090.72	(J)	S	=	2.4	(J/K)	V	=	0.25	(cc)	Cp	=	1.08	(J/K)
	chromite	hercynite	magnetite	spinel	ulvospinel
	0	-26.24	39.26	36.56	50.41
water	mass	=	0.02	(gm)	density	=	0.16	(gm/cc)
	H2O
	G	=	-600.19	(J)	H	=	-273.29	(J)	S	=	0.25	(J/K)	V	=	0.15	(cc)	Cp	=	0.07	(J/K)
Total	solids	mass	=	4.8	(gm)	density	=	3.21	(gm/cc)
	G	=	-67883.2	(J)	H	=	-53603.6	(J)	S	=	10.71	(J/K)	V	=	1.5	(cc)	Cp	=	5.35	(J/K)
Summary	of	all	fractionated	phases:	(total	mass	=	12.22	grams)
clinopyroxene	mass	=	5.52	(gm)	density	=	3.3	(gm/cc)	(analysis	in	mole	%)
	cpx	Na0.01Ca0.88Fe''0.18Mg0.75Fe'''0.07Ti0.07Al0.27Si1.76O6
	G	=	-86623.2	(J)	H	=	-70306.9	(J)	S	=	12.24	(J/K)	V	=	1.67	(cc)	Cp	=	6.38	(J/K)
	diopside	clinoenstatit	hedenbergite	alumino-buffo	buffonite	essenite	jadeite
	46.1	10.51	18.14	16.5	-1.64	9.06	1.32
spinel	mass	=	6.7	(gm)	density	=	4.49	(gm/cc)	(analysis	in	mole	%)
	Fe''1.12Mg0.44Fe'''0.68Al0.19Cr0.00Ti0.56O4
	G	=	-62497.1	(J)	H	=	-43583.8	(J)	S	=	14.19	(J/K)	V	=	1.49	(cc)	Cp	=	6.44	(J/K)
	chromite	hercynite	magnetite	spinel	ulvospinel
	0	-34.29	34.24	44.02	56.03
Viscosity	of	the	System:	2.65	(log	10	poise)
System	mass	=	98.6	(gm)	density	=	2.57	(gm/cc)
	G	=	-1.51969e+06	(J)	H	=	-1.16624e+06	(J)	S	=	265.12	(J/K)	V	=	38.37	(cc)	Cp	=	137.09	(J/K)
Oxygen	delta	moles	=	0.0053059	delta	grams	=	0.169782
	G	=	-1611.8	(J)	H	=	183.18	(J)	S	=	1.35	(J/K)	V	=	588.12	(cc)	Cp	=	0.19	(J/K)
**********----------**********
Title:	Dummy	Title
T	=	1050	(C)	P	=	1	(kbars)	log(10)	f	O2	=	-10.1	delta	HM	=	-5.56	NNO	=	-0.62	QFM	=	0	COH	=	2.01	IW	=	3.71
Constraint	Flags:	fO2	path	=	QFM	Fractionate	Solids
Liquid	mass	=	77.53	(gm)	density	=	2.4	(gm/cc)	viscosity	=	2.55	(log	10	poise)	(analysis	in	wt	%)
	G	=	-1.24278e+06	(J)	H	=	-956217	(J)	S	=	216.58	(J/K)	V	=	32.29	(cc)	Cp	=	112.78	(J/K)
	SiO2	TiO2	Al2O3	Fe2O3	Cr2O3	FeO	MnO	MgO	NiO	CoO	CaO	Na2O	K2O	P2O5	H2O	CO2	SO3	Cl2O-1	F2O-1
	51.26	1.47	16.33	1.72	0	7.64	0.32	3.06	0	0	8.73	3.54	1.63	0.92	3.38	0	0	0	0
clinopyroxene	mass	=	3.12	(gm)	density	=	3.31	(gm/cc)	(analysis	in	mole	%)
	cpx	Na0.01Ca0.88Fe''0.20Mg0.72Fe'''0.08Ti0.07Al0.28Si1.75O6
	G	=	-48713.3	(J)	H	=	-39598.7	(J)	S	=	6.89	(J/K)	V	=	0.94	(cc)	Cp	=	3.59	(J/K)
	diopside	clinoenstatit	hedenbergite	alumino-buffo	buffonite	essenite	jadeite
	43.87	10.3	19.72	16.93	-2.27	9.98	1.46
spinel	mass	=	0.89	(gm)	density	=	4.58	(gm/cc)	(analysis	in	mole	%)
	Fe''1.15Mg0.33Fe'''0.83Al0.21Cr0.00Ti0.48O4
	G	=	-7935.23	(J)	H	=	-5461.73	(J)	S	=	1.87	(J/K)	V	=	0.19	(cc)	Cp	=	0.84	(J/K)
	chromite	hercynite	magnetite	spinel	ulvospinel
	0	-22.72	41.34	33.33	48.04
water	mass	=	0.08	(gm)	density	=	0.17	(gm/cc)
	H2O
	G	=	-2008.84	(J)	H	=	-920.91	(J)	S	=	0.82	(J/K)	V	=	0.48	(cc)	Cp	=	0.25	(J/K)
Total	solids	mass	=	4.1	(gm)	density	=	2.53	(gm/cc)
	G	=	-58657.4	(J)	H	=	-45981.4	(J)	S	=	9.58	(J/K)	V	=	1.62	(cc)	Cp	=	4.68	(J/K)
Summary	of	all	fractionated	phases:	(total	mass	=	17	grams)
clinopyroxene	mass	=	9.16	(gm)	density	=	3.3	(gm/cc)	(analysis	in	mole	%)
	cpx	Na0.01Ca0.88Fe''0.18Mg0.74Fe'''0.07Ti0.07Al0.27Si1.76O6
	G	=	-143379	(J)	H	=	-116624	(J)	S	=	20.22	(J/K)	V	=	2.77	(cc)	Cp	=	10.56	(J/K)
	diopside	clinoenstatit	hedenbergite	alumino-buffo	buffonite	essenite	jadeite
	45.64	10.47	18.47	16.59	-1.77	9.25	1.35
spinel	mass	=	7.84	(gm)	density	=	4.5	(gm/cc)	(analysis	in	mole	%)
	Fe''1.12Mg0.43Fe'''0.70Al0.20Cr0.00Ti0.55O4
	G	=	-72602.6	(J)	H	=	-50736	(J)	S	=	16.53	(J/K)	V	=	1.74	(cc)	Cp	=	7.51	(J/K)
	chromite	hercynite	magnetite	spinel	ulvospinel
	0	-33.13	34.96	42.95	55.23
Viscosity	of	the	System:	2.88	(log	10	poise)
System	mass	=	98.62	(gm)	density	=	2.57	(gm/cc)
	G	=	-1.51742e+06	(J)	H	=	-1.16956e+06	(J)	S	=	262.9	(J/K)	V	=	38.43	(cc)	Cp	=	135.54	(J/K)
Oxygen	delta	moles	=	0.00597592	delta	grams	=	0.191222
	G	=	-1800.18	(J)	H	=	204.15	(J)	S	=	1.51	(J/K)	V	=	657.41	(cc)	Cp	=	0.22	(J/K)
**********----------**********
Title:	Dummy	Title
T	=	1040	(C)	P	=	1	(kbars)	log(10)	f	O2	=	-10.24	delta	HM	=	-5.56	NNO	=	-0.61	QFM	=	0	COH	=	2	IW	=	3.72
Constraint	Flags:	fO2	path	=	QFM	Fractionate	Solids
Liquid	mass	=	74.25	(gm)	density	=	2.38	(gm/cc)	viscosity	=	2.68	(log	10	poise)	(analysis	in	wt	%)
	G	=	-1.19395e+06	(J)	H	=	-921858	(J)	S	=	207.2	(J/K)	V	=	31.14	(cc)	Cp	=	107.81	(J/K)
	SiO2	TiO2	Al2O3	Fe2O3	Cr2O3	FeO	MnO	MgO	NiO	CoO	CaO	Na2O	K2O	P2O5	H2O	CO2	SO3	Cl2O-1	F2O-1
	51.93	1.28	16.78	1.63	0	7.16	0.34	2.71	0	0	8.36	3.69	1.7	0.96	3.47	0	0	0	0
clinopyroxene	mass	=	2.55	(gm)	density	=	3.31	(gm/cc)	(analysis	in	mole	%)
	cpx	Na0.02Ca0.88Fe''0.20Mg0.70Fe'''0.08Ti0.07Al0.29Si1.75O6
	G	=	-39643.8	(J)	H	=	-32289.6	(J)	S	=	5.6	(J/K)	V	=	0.77	(cc)	Cp	=	2.93	(J/K)
	diopside	clinoenstatit	hedenbergite	alumino-buffo	buffonite	essenite	jadeite
	42.88	10.17	20.45	17.11	-2.59	10.44	1.54
spinel	mass	=	0.71	(gm)	density	=	4.61	(gm/cc)	(analysis	in	mole	%)
	Fe''1.15Mg0.30Fe'''0.87Al0.22Cr0.00Ti0.46O4
	G	=	-6233.88	(J)	H	=	-4287.61	(J)	S	=	1.48	(J/K)	V	=	0.15	(cc)	Cp	=	0.67	(J/K)
	chromite	hercynite	magnetite	spinel	ulvospinel
	0	-19.57	43.39	30.48	45.7
water	mass	=	0.13	(gm)	density	=	0.17	(gm/cc)
	H2O
	G	=	-3166.88	(J)	H	=	-1461.66	(J)	S	=	1.3	(J/K)	V	=	0.76	(cc)	Cp	=	0.39	(J/K)
Total	solids	mass	=	3.39	(gm)	density	=	2.02	(gm/cc)
	G	=	-49044.6	(J)	H	=	-38038.8	(J)	S	=	8.38	(J/K)	V	=	1.68	(cc)	Cp	=	3.99	(J/K)
Summary	of	all	fractionated	phases:	(total	mass	=	21.01	grams)
clinopyroxene	mass	=	12.28	(gm)	density	=	3.3	(gm/cc)	(analysis	in	mole	%)
	cpx	Na0.01Ca0.88Fe''0.19Mg0.73Fe'''0.08Ti0.07Al0.27Si1.76O6
	G	=	-191787	(J)	H	=	-156335	(J)	S	=	27	(J/K)	V	=	3.72	(cc)	Cp	=	14.14	(J/K)
	diopside	clinoenstatit	hedenbergite	alumino-buffo	buffonite	essenite	jadeite
	45.19	10.43	18.79	16.68	-1.89	9.43	1.38
spinel	mass	=	8.73	(gm)	density	=	4.51	(gm/cc)	(analysis	in	mole	%)
	Fe''1.13Mg0.42Fe'''0.71Al0.20Cr0.00Ti0.55O4
	G	=	-80336	(J)	H	=	-56267.4	(J)	S	=	18.33	(J/K)	V	=	1.93	(cc)	Cp	=	8.34	(J/K)
	chromite	hercynite	magnetite	spinel	ulvospinel
	0	-32.08	35.6	41.98	54.5
Viscosity	of	the	System:	3.1	(log	10	poise)
System	mass	=	98.64	(gm)	density	=	2.56	(gm/cc)
	G	=	-1.51512e+06	(J)	H	=	-1.1725e+06	(J)	S	=	260.91	(J/K)	V	=	38.47	(cc)	Cp	=	134.28	(J/K)
Oxygen	delta	moles	=	0.00653897	delta	grams	=	0.209239
	G	=	-1953.23	(J)	H	=	221.03	(J)	S	=	1.66	(J/K)	V	=	713.92	(cc)	Cp	=	0.24	(J/K)
**********----------**********
Title:	Dummy	Title
T	=	1030	(C)	P	=	1	(kbars)	log(10)	f	O2	=	-10.38	delta	HM	=	-5.56	NNO	=	-0.61	QFM	=	0	COH	=	1.99	IW	=	3.74
Constraint	Flags:	fO2	path	=	QFM	Fractionate	Solids
Liquid	mass	=	71.51	(gm)	density	=	2.37	(gm/cc)	viscosity	=	2.81	(log	10	poise)	(analysis	in	wt	%)
	G	=	-1.15322e+06	(J)	H	=	-893475	(J)	S	=	199.32	(J/K)	V	=	30.17	(cc)	Cp	=	103.67	(J/K)
	SiO2	TiO2	Al2O3	Fe2O3	Cr2O3	FeO	MnO	MgO	NiO	CoO	CaO	Na2O	K2O	P2O5	H2O	CO2	SO3	Cl2O-1	F2O-1
	52.53	1.13	17.17	1.55	0	6.73	0.35	2.4	0	0	8.02	3.83	1.76	0.99	3.54	0	0	0	0
clinopyroxene	mass	=	2.13	(gm)	density	=	3.32	(gm/cc)	(analysis	in	mole	%)
	cpx	Na0.02Ca0.88Fe''0.21Mg0.69Fe'''0.08Ti0.07Al0.30Si1.75O6
	G	=	-32968.8	(J)	H	=	-26906.1	(J)	S	=	4.65	(J/K)	V	=	0.64	(cc)	Cp	=	2.44	(J/K)
	diopside	clinoenstatit	hedenbergite	alumino-buffo	buffonite	essenite	jadeite
	41.94	10.01	21.17	17.27	-2.9	10.9	1.62
spinel	mass	=	0.58	(gm)	density	=	4.63	(gm/cc)	(analysis	in	mole	%)
	Fe''1.15Mg0.28Fe'''0.91Al0.22Cr0.00Ti0.43O4
	G	=	-5043.13	(J)	H	=	-3467.58	(J)	S	=	1.21	(J/K)	V	=	0.13	(cc)	Cp	=	0.55	(J/K)
	chromite	hercynite	magnetite	spinel	ulvospinel
	0	-16.73	45.4	27.94	43.4
water	mass	=	0.17	(gm)	density	=	0.17	(gm/cc)
	H2O
	G	=	-4130.33	(J)	H	=	-1919.3	(J)	S	=	1.7	(J/K)	V	=	0.98	(cc)	Cp	=	0.51	(J/K)
Total	solids	mass	=	2.88	(gm)	density	=	1.65	(gm/cc)
	G	=	-42142.3	(J)	H	=	-32293	(J)	S	=	7.56	(J/K)	V	=	1.75	(cc)	Cp	=	3.5	(J/K)
Summary	of	all	fractionated	phases:	(total	mass	=	24.26	grams)
clinopyroxene	mass	=	14.82	(gm)	density	=	3.31	(gm/cc)	(analysis	in	mole	%)
	cpx	Na0.01Ca0.88Fe''0.19Mg0.73Fe'''0.08Ti0.07Al0.28Si1.76O6
	G	=	-231070	(J)	H	=	-188767	(J)	S	=	32.46	(J/K)	V	=	4.48	(cc)	Cp	=	17.05	(J/K)
	diopside	clinoenstatit	hedenbergite	alumino-buffo	buffonite	essenite	jadeite
	44.8	10.38	19.07	16.75	-2.01	9.6	1.4
spinel	mass	=	9.44	(gm)	density	=	4.52	(gm/cc)	(analysis	in	mole	%)
	Fe''1.13Mg0.41Fe'''0.72Al0.20Cr0.00Ti0.54O4
	G	=	-86354.3	(J)	H	=	-60631.2	(J)	S	=	19.74	(J/K)	V	=	2.09	(cc)	Cp	=	9	(J/K)
	chromite	hercynite	magnetite	spinel	ulvospinel
	0	-31.16	36.18	41.13	53.85
Viscosity	of	the	System:	3.3	(log	10	poise)
System	mass	=	98.65	(gm)	density	=	2.56	(gm/cc)
	G	=	-1.51279e+06	(J)	H	=	-1175166	(J)	S	=	259.08	(J/K)	V	=	38.49	(cc)	Cp	=	133.22	(J/K)
Oxygen	delta	moles	=	0.00702379	delta	grams	=	0.224753
	G	=	-2080.27	(J)	H	=	234.89	(J)	S	=	1.78	(J/K)	V	=	761.01	(cc)	Cp	=	0.25	(J/K)
**********----------**********
Title:	Dummy	Title
T	=	1020	(C)	P	=	1	(kbars)	log(10)	f	O2	=	-10.53	delta	HM	=	-5.56	NNO	=	-0.61	QFM	=	0	COH	=	1.97	IW	=	3.75
Constraint	Flags:	fO2	path	=	QFM	Fractionate	Solids
Liquid	mass	=	69.07	(gm)	density	=	2.36	(gm/cc)	viscosity	=	2.94	(log	10	poise)	(analysis	in	wt	%)
	G	=	-1.1166e+06	(J)	H	=	-868024	(J)	S	=	192.22	(J/K)	V	=	29.29	(cc)	Cp	=	99.93	(J/K)
	SiO2	TiO2	Al2O3	Fe2O3	Cr2O3	FeO	MnO	MgO	NiO	CoO	CaO	Na2O	K2O	P2O5	H2O	CO2	SO3	Cl2O-1	F2O-1
	53.15	0.99	17.56	1.47	0	6.32	0.36	2.13	0	0	7.65	3.96	1.82	0.97	3.61	0	0	0	0
clinopyroxene	mass	=	1.84	(gm)	density	=	3.32	(gm/cc)	(analysis	in	mole	%)
	cpx	Na0.02Ca0.88Fe''0.22Mg0.68Fe'''0.08Ti0.07Al0.30Si1.75O6
	G	=	-28389.2	(J)	H	=	-23214.7	(J)	S	=	4	(J/K)	V	=	0.55	(cc)	Cp	=	2.1	(J/K)
	diopside	clinoenstatit	hedenbergite	alumino-buffo	buffonite	essenite	jadeite
	41.06	9.86	21.87	17.38	-3.24	11.36	1.71
spinel	mass	=	0.5	(gm)	density	=	4.65	(gm/cc)	(analysis	in	mole	%)
	Fe''1.15Mg0.26Fe'''0.95Al0.23Cr0.00Ti0.41O4
	G	=	-4255.4	(J)	H	=	-2926.28	(J)	S	=	1.03	(J/K)	V	=	0.11	(cc)	Cp	=	0.47	(J/K)
	chromite	hercynite	magnetite	spinel	ulvospinel
	0	-14.17	47.35	25.68	41.14
apatite	mass	=	0.09	(gm)	density	=	3.06	(gm/cc)
	Ca5(PO4)3OH
	G	=	-1396.49	(J)	H	=	-1129.34	(J)	S	=	0.21	(J/K)	V	=	0.03	(cc)	Cp	=	0.11	(J/K)
water	mass	=	0.2	(gm)	density	=	0.17	(gm/cc)
	H2O
	G	=	-4998.71	(J)	H	=	-2338.65	(J)	S	=	2.06	(J/K)	V	=	1.18	(cc)	Cp	=	0.63	(J/K)
Total	solids	mass	=	2.63	(gm)	density	=	1.41	(gm/cc)
	G	=	-39039.8	(J)	H	=	-29608.9	(J)	S	=	7.29	(J/K)	V	=	1.87	(cc)	Cp	=	3.3	(J/K)
Summary	of	all	fractionated	phases:	(total	mass	=	26.97	grams)
clinopyroxene	mass	=	16.95	(gm)	density	=	3.31	(gm/cc)	(analysis	in	mole	%)
	cpx	Na0.01Ca0.88Fe''0.19Mg0.72Fe'''0.08Ti0.07Al0.28Si1.76O6
	G	=	-263634	(J)	H	=	-215839	(J)	S	=	36.96	(J/K)	V	=	5.12	(cc)	Cp	=	19.47	(J/K)
	diopside	clinoenstatit	hedenbergite	alumino-buffo	buffonite	essenite	jadeite
	44.44	10.33	19.33	16.82	-2.12	9.77	1.43
spinel	mass	=	10.02	(gm)	density	=	4.53	(gm/cc)	(analysis	in	mole	%)
	Fe''1.13Mg0.40Fe'''0.73Al0.20Cr0.00Ti0.53O4
	G	=	-91170.8	(J)	H	=	-64180.4	(J)	S	=	20.87	(J/K)	V	=	2.21	(cc)	Cp	=	9.54	(J/K)
	chromite	hercynite	magnetite	spinel	ulvospinel
	0	-30.33	36.7	40.37	53.26
Viscosity	of	the	System:	3.51	(log	10	poise)
System	mass	=	98.67	(gm)	density	=	2.56	(gm/cc)
	G	=	-1.51044e+06	(J)	H	=	-1.17765e+06	(J)	S	=	257.35	(J/K)	V	=	38.5	(cc)	Cp	=	132.23	(J/K)
Oxygen	delta	moles	=	0.00745016	delta	grams	=	0.238396
	G	=	-2187.72	(J)	H	=	246.47	(J)	S	=	1.88	(J/K)	V	=	801.01	(cc)	Cp	=	0.27	(J/K)
**********----------**********
Title:	Dummy	Title
T	=	1010	(C)	P	=	1	(kbars)	log(10)	f	O2	=	-10.67	delta	HM	=	-5.57	NNO	=	-0.6	QFM	=	0	COH	=	1.96	IW	=	3.77
Constraint	Flags:	fO2	path	=	QFM	Fractionate	Solids
Liquid	mass	=	66.48	(gm)	density	=	2.35	(gm/cc)	viscosity	=	3.08	(log	10	poise)	(analysis	in	wt	%)
	G	=	-1.07713e+06	(J)	H	=	-840111	(J)	S	=	184.72	(J/K)	V	=	28.34	(cc)	Cp	=	95.97	(J/K)
	SiO2	TiO2	Al2O3	Fe2O3	Cr2O3	FeO	MnO	MgO	NiO	CoO	CaO	Na2O	K2O	P2O5	H2O	CO2	SO3	Cl2O-1	F2O-1
	53.85	0.87	17.84	1.4	0	5.94	0.38	1.9	0	0	7.24	4.09	1.89	0.93	3.68	0	0	0	0
clinopyroxene	mass	=	1.53	(gm)	density	=	3.32	(gm/cc)	(analysis	in	mole	%)
	cpx	Na0.02Ca0.88Fe''0.23Mg0.67Fe'''0.08Ti0.07Al0.30Si1.75O6
	G	=	-23512.1	(J)	H	=	-19265.4	(J)	S	=	3.31	(J/K)	V	=	0.46	(cc)	Cp	=	1.74	(J/K)
	diopside	clinoenstatit	hedenbergite	alumino-buffo	buffonite	essenite	jadeite
	40.58	9.95	22.62	16.93	-3.6	11.71	1.8
feldspar	mass	=	0.42	(gm)	density	=	2.68	(gm/cc)	(analysis	in	mole	%)
	K0.01Na0.21Ca0.78Al1.78Si2.22O8
	G	=	-7080.65	(J)	H	=	-5858.01	(J)	S	=	0.95	(J/K)	V	=	0.16	(cc)	Cp	=	0.51	(J/K)
	albite	anorthite	sanidine
	21.29	78.19	0.52
spinel	mass	=	0.48	(gm)	density	=	4.67	(gm/cc)	(analysis	in	mole	%)
	Fe''1.15Mg0.24Fe'''0.98Al0.23Cr0.00Ti0.39O4
	G	=	-4071.47	(J)	H	=	-2801.17	(J)	S	=	0.99	(J/K)	V	=	0.1	(cc)	Cp	=	0.45	(J/K)
	chromite	hercynite	magnetite	spinel	ulvospinel
	0	-12.05	49.22	23.78	39.05
apatite	mass	=	0.14	(gm)	density	=	3.06	(gm/cc)
	Ca5(PO4)3OH
	G	=	-2051.39	(J)	H	=	-1662.96	(J)	S	=	0.3	(J/K)	V	=	0.04	(cc)	Cp	=	0.16	(J/K)
water	mass	=	0.25	(gm)	density	=	0.17	(gm/cc)
	H2O
	G	=	-6170.77	(J)	H	=	-2906.69	(J)	S	=	2.54	(J/K)	V	=	1.45	(cc)	Cp	=	0.78	(J/K)
Total	solids	mass	=	2.81	(gm)	density	=	1.27	(gm/cc)
	G	=	-42886.4	(J)	H	=	-32494.2	(J)	S	=	8.1	(J/K)	V	=	2.21	(cc)	Cp	=	3.63	(J/K)
Summary	of	all	fractionated	phases:	(total	mass	=	29.39	grams)
clinopyroxene	mass	=	18.78	(gm)	density	=	3.31	(gm/cc)	(analysis	in	mole	%)
	cpx	Na0.01Ca0.88Fe''0.20Mg0.72Fe'''0.08Ti0.07Al0.28Si1.75O6
	G	=	-291580	(J)	H	=	-239241	(J)	S	=	40.79	(J/K)	V	=	5.67	(cc)	Cp	=	21.54	(J/K)
	diopside	clinoenstatit	hedenbergite	alumino-buffo	buffonite	essenite	jadeite
	44.11	10.29	19.58	16.87	-2.23	9.92	1.46
spinel	mass	=	10.52	(gm)	density	=	4.53	(gm/cc)	(analysis	in	mole	%)
	Fe''1.13Mg0.40Fe'''0.74Al0.20Cr0.00Ti0.53O4
	G	=	-95190.4	(J)	H	=	-67192.8	(J)	S	=	21.82	(J/K)	V	=	2.32	(cc)	Cp	=	9.99	(J/K)
	chromite	hercynite	magnetite	spinel	ulvospinel
	0	-29.59	37.2	39.69	52.69
apatite	mass	=	0.09	(gm)	density	=	3.06	(gm/cc)
	Ca5(PO4)3OH
	G	=	-1318.33	(J)	H	=	-1068.71	(J)	S	=	0.19	(J/K)	V	=	0.03	(cc)	Cp	=	0.1	(J/K)
Viscosity	of	the	System:	3.74	(log	10	poise)
System	mass	=	98.68	(gm)	density	=	2.56	(gm/cc)
	G	=	-1.50811e+06	(J)	H	=	-1.18011e+06	(J)	S	=	255.62	(J/K)	V	=	38.57	(cc)	Cp	=	131.24	(J/K)
Oxygen	delta	moles	=	0.00786622	delta	grams	=	0.25171
	G	=	-2290.03	(J)	H	=	257.41	(J)	S	=	1.99	(J/K)	V	=	839.21	(cc)	Cp	=	0.28	(J/K)
**********----------**********
Title:	Dummy	Title
T	=	1000	(C)	P	=	1	(kbars)	log(10)	f	O2	=	-10.82	delta	HM	=	-5.57	NNO	=	-0.6	QFM	=	0	COH	=	1.95	IW	=	3.78
Constraint	Flags:	fO2	path	=	QFM	Fractionate	Solids
Liquid	mass	=	62.25	(gm)	density	=	2.33	(gm/cc)	viscosity	=	3.23	(log	10	poise)	(analysis	in	wt	%)
	G	=	-1.01014e+06	(J)	H	=	-790353	(J)	S	=	172.63	(J/K)	V	=	26.69	(cc)	Cp	=	89.58	(J/K)
	SiO2	TiO2	Al2O3	Fe2O3	Cr2O3	FeO	MnO	MgO	NiO	CoO	CaO	Na2O	K2O	P2O5	H2O	CO2	SO3	Cl2O-1	F2O-1
	54.89	0.75	17.66	1.33	0	5.57	0.4	1.79	0	0	6.68	4.26	2.02	0.9	3.73	0	0	0	0
clinopyroxene	mass	=	1.01	(gm)	density	=	3.32	(gm/cc)	(analysis	in	mole	%)
	cpx	Na0.02Ca0.87Fe''0.24Mg0.69Fe'''0.07Ti0.05Al0.28Si1.78O6
	G	=	-15598.3	(J)	H	=	-12808	(J)	S	=	2.19	(J/K)	V	=	0.31	(cc)	Cp	=	1.16	(J/K)
	diopside	clinoenstatit	hedenbergite	alumino-buffo	buffonite	essenite	jadeite
	41.37	11.34	23.6	14.36	-3.94	11.4	1.87
feldspar	mass	=	2.35	(gm)	density	=	2.68	(gm/cc)	(analysis	in	mole	%)
	K0.01Na0.24Ca0.75Al1.75Si2.25O8
	G	=	-39662.1	(J)	H	=	-32870.9	(J)	S	=	5.33	(J/K)	V	=	0.88	(cc)	Cp	=	2.84	(J/K)
	albite	anorthite	sanidine
	23.93	75.47	0.6
spinel	mass	=	0.65	(gm)	density	=	4.68	(gm/cc)	(analysis	in	mole	%)
	Fe''1.15Mg0.23Fe'''1.02Al0.23Cr0.00Ti0.37O4
	G	=	-5419.34	(J)	H	=	-3731.45	(J)	S	=	1.33	(J/K)	V	=	0.14	(cc)	Cp	=	0.6	(J/K)
	chromite	hercynite	magnetite	spinel	ulvospinel
	0	-11.14	51.02	22.65	37.46
apatite	mass	=	0.13	(gm)	density	=	3.06	(gm/cc)
	Ca5(PO4)3OH
	G	=	-1972.04	(J)	H	=	-1602.49	(J)	S	=	0.29	(J/K)	V	=	0.04	(cc)	Cp	=	0.15	(J/K)
water	mass	=	0.37	(gm)	density	=	0.18	(gm/cc)
	H2O
	G	=	-9122.13	(J)	H	=	-4326.25	(J)	S	=	3.77	(J/K)	V	=	2.12	(cc)	Cp	=	1.16	(J/K)
Total	solids	mass	=	4.51	(gm)	density	=	1.3	(gm/cc)
	G	=	-71774	(J)	H	=	-55339.1	(J)	S	=	12.91	(J/K)	V	=	3.49	(cc)	Cp	=	5.91	(J/K)
Summary	of	all	fractionated	phases:	(total	mass	=	31.94	grams)
clinopyroxene	mass	=	20.31	(gm)	density	=	3.31	(gm/cc)	(analysis	in	mole	%)
	cpx	Na0.01Ca0.88Fe''0.20Mg0.72Fe'''0.08Ti0.07Al0.28Si1.75O6
	G	=	-314618	(J)	H	=	-258710	(J)	S	=	43.91	(J/K)	V	=	6.13	(cc)	Cp	=	23.26	(J/K)
	diopside	clinoenstatit	hedenbergite	alumino-buffo	buffonite	essenite	jadeite
	43.85	10.26	19.81	16.88	-2.33	10.05	1.48
feldspar	mass	=	0.42	(gm)	density	=	2.68	(gm/cc)	(analysis	in	mole	%)
	K0.01Na0.21Ca0.78Al1.78Si2.22O8
	G	=	-7024.69	(J)	H	=	-5824.56	(J)	S	=	0.94	(J/K)	V	=	0.15	(cc)	Cp	=	0.5	(J/K)
	albite	anorthite	sanidine
	21.29	78.19	0.52
spinel	mass	=	11	(gm)	density	=	4.54	(gm/cc)	(analysis	in	mole	%)
	Fe''1.13Mg0.39Fe'''0.75Al0.20Cr0.00Ti0.52O4
	G	=	-99017.3	(J)	H	=	-70084.3	(J)	S	=	22.73	(J/K)	V	=	2.42	(cc)	Cp	=	10.43	(J/K)
	chromite	hercynite	magnetite	spinel	ulvospinel
	0	-28.83	37.71	39.01	52.11
apatite	mass	=	0.22	(gm)	density	=	3.06	(gm/cc)
	Ca5(PO4)3OH
	G	=	-3288.77	(J)	H	=	-2672.48	(J)	S	=	0.48	(J/K)	V	=	0.07	(cc)	Cp	=	0.25	(J/K)
Viscosity	of	the	System:	4.09	(log	10	poise)
System	mass	=	98.7	(gm)	density	=	2.53	(gm/cc)
	G	=	-1.50586e+06	(J)	H	=	-1.18298e+06	(J)	S	=	253.61	(J/K)	V	=	38.95	(cc)	Cp	=	129.94	(J/K)
Oxygen	delta	moles	=	0.00840658	delta	grams	=	0.269001
	G	=	-2426.13	(J)	H	=	272.08	(J)	S	=	2.12	(J/K)	V	=	889.87	(cc)	Cp	=	0.3	(J/K)
**********----------**********
Title:	Dummy	Title
T	=	990	(C)	P	=	1	(kbars)	log(10)	f	O2	=	-10.97	delta	HM	=	-5.57	NNO	=	-0.6	QFM	=	0	COH	=	1.93	IW	=	3.8
Constraint	Flags:	fO2	path	=	QFM	Fractionate	Solids
Liquid	mass	=	58.59	(gm)	density	=	2.32	(gm/cc)	viscosity	=	3.37	(log	10	poise)	(analysis	in	wt	%)
	G	=	-952141	(J)	H	=	-747325	(J)	S	=	162.15	(J/K)	V	=	25.25	(cc)	Cp	=	84.08	(J/K)
	SiO2	TiO2	Al2O3	Fe2O3	Cr2O3	FeO	MnO	MgO	NiO	CoO	CaO	Na2O	K2O	P2O5	H2O	CO2	SO3	Cl2O-1	F2O-1
	55.86	0.65	17.49	1.27	0	5.22	0.43	1.69	0	0	6.18	4.41	2.14	0.89	3.77	0	0	0	0
clinopyroxene	mass	=	0.81	(gm)	density	=	3.31	(gm/cc)	(analysis	in	mole	%)
	cpx	Na0.02Ca0.85Fe''0.25Mg0.71Fe'''0.07Ti0.04Al0.25Si1.81O6
	G	=	-12394.6	(J)	H	=	-10198.4	(J)	S	=	1.74	(J/K)	V	=	0.24	(cc)	Cp	=	0.92	(J/K)
	diopside	clinoenstatit	hedenbergite	alumino-buffo	buffonite	essenite	jadeite
	41.31	12.79	24.59	12.47	-4.11	11.01	1.94
feldspar	mass	=	2.1	(gm)	density	=	2.67	(gm/cc)	(analysis	in	mole	%)
	K0.01Na0.27Ca0.73Al1.73Si2.27O8
	G	=	-35483.6	(J)	H	=	-29458.3	(J)	S	=	4.77	(J/K)	V	=	0.79	(cc)	Cp	=	2.55	(J/K)
	albite	anorthite	sanidine
	26.81	72.51	0.69
spinel	mass	=	0.55	(gm)	density	=	4.7	(gm/cc)	(analysis	in	mole	%)
	Fe''1.14Mg0.22Fe'''1.06Al0.23Cr0.00Ti0.36O4
	G	=	-4555.53	(J)	H	=	-3139.76	(J)	S	=	1.12	(J/K)	V	=	0.12	(cc)	Cp	=	0.51	(J/K)
	chromite	hercynite	magnetite	spinel	ulvospinel
	0	-10.31	52.82	21.64	35.85
apatite	mass	=	0.11	(gm)	density	=	3.06	(gm/cc)
	Ca5(PO4)3OH
	G	=	-1644.51	(J)	H	=	-1339.55	(J)	S	=	0.24	(J/K)	V	=	0.04	(cc)	Cp	=	0.12	(J/K)
water	mass	=	0.48	(gm)	density	=	0.18	(gm/cc)
	H2O
	G	=	-11719.2	(J)	H	=	-5595.94	(J)	S	=	4.85	(J/K)	V	=	2.71	(cc)	Cp	=	1.5	(J/K)
Total	solids	mass	=	4.05	(gm)	density	=	1.04	(gm/cc)
	G	=	-65797.4	(J)	H	=	-49732	(J)	S	=	12.72	(J/K)	V	=	3.89	(cc)	Cp	=	5.61	(J/K)
Summary	of	all	fractionated	phases:	(total	mass	=	36.07	grams)
clinopyroxene	mass	=	21.32	(gm)	density	=	3.32	(gm/cc)	(analysis	in	mole	%)
	cpx	Na0.02Ca0.88Fe''0.20Mg0.72Fe'''0.08Ti0.07Al0.28Si1.76O6
	G	=	-329721	(J)	H	=	-271734	(J)	S	=	45.91	(J/K)	V	=	6.43	(cc)	Cp	=	24.39	(J/K)
	diopside	clinoenstatit	hedenbergite	alumino-buffo	buffonite	essenite	jadeite
	43.73	10.31	19.99	16.76	-2.41	10.12	1.5
feldspar	mass	=	2.76	(gm)	density	=	2.68	(gm/cc)	(analysis	in	mole	%)
	K0.01Na0.24Ca0.76Al1.76Si2.24O8
	G	=	-46577.9	(J)	H	=	-38690.4	(J)	S	=	6.24	(J/K)	V	=	1.03	(cc)	Cp	=	3.34	(J/K)
	albite	anorthite	sanidine
	23.53	75.88	0.59
spinel	mass	=	11.65	(gm)	density	=	4.55	(gm/cc)	(analysis	in	mole	%)
	Fe''1.13Mg0.38Fe'''0.77Al0.21Cr0.00Ti0.51O4
	G	=	-104180	(J)	H	=	-73911.2	(J)	S	=	23.96	(J/K)	V	=	2.56	(cc)	Cp	=	11.02	(J/K)
	chromite	hercynite	magnetite	spinel	ulvospinel
	0	-27.87	38.43	38.12	51.31
apatite	mass	=	0.34	(gm)	density	=	3.06	(gm/cc)
	Ca5(PO4)3OH
	G	=	-5177.21	(J)	H	=	-4217.16	(J)	S	=	0.76	(J/K)	V	=	0.11	(cc)	Cp	=	0.39	(J/K)
Viscosity	of	the	System:	4.46	(log	10	poise)
System	mass	=	98.71	(gm)	density	=	2.51	(gm/cc)
	G	=	-1.5036e+06	(J)	H	=	-1.18561e+06	(J)	S	=	251.74	(J/K)	V	=	39.27	(cc)	Cp	=	128.83	(J/K)
Oxygen	delta	moles	=	0.00887613	delta	grams	=	0.284026
	G	=	-2539.28	(J)	H	=	284.09	(J)	S	=	2.24	(J/K)	V	=	932.19	(cc)	Cp	=	0.32	(J/K)
**********----------**********
Title:	Dummy	Title
T	=	980	(C)	P	=	1	(kbars)	log(10)	f	O2	=	-11.13	delta	HM	=	-5.58	NNO	=	-0.59	QFM	=	0	COH	=	1.92	IW	=	3.82
Constraint	Flags:	fO2	path	=	QFM	Fractionate	Solids
Liquid	mass	=	55.39	(gm)	density	=	2.31	(gm/cc)	viscosity	=	3.51	(log	10	poise)	(analysis	in	wt	%)
	G	=	-901048	(J)	H	=	-709446	(J)	S	=	152.9	(J/K)	V	=	23.97	(cc)	Cp	=	79.26	(J/K)
	SiO2	TiO2	Al2O3	Fe2O3	Cr2O3	FeO	MnO	MgO	NiO	CoO	CaO	Na2O	K2O	P2O5	H2O	CO2	SO3	Cl2O-1	F2O-1
	56.78	0.57	17.3	1.21	0	4.89	0.45	1.6	0	0	5.71	4.55	2.26	0.87	3.81	0	0	0	0
clinopyroxene	mass	=	0.65	(gm)	density	=	3.31	(gm/cc)	(analysis	in	mole	%)
	cpx	Na0.02Ca0.84Fe''0.26Mg0.73Fe'''0.06Ti0.03Al0.24Si1.83O6
	G	=	-9943.47	(J)	H	=	-8197.92	(J)	S	=	1.39	(J/K)	V	=	0.2	(cc)	Cp	=	0.74	(J/K)
	diopside	clinoenstatit	hedenbergite	alumino-buffo	buffonite	essenite	jadeite
	40.56	14.45	25.66	10.94	-4.19	10.58	2
feldspar	mass	=	1.92	(gm)	density	=	2.67	(gm/cc)	(analysis	in	mole	%)
	K0.01Na0.30Ca0.69Al1.69Si2.31O8
	G	=	-32303.2	(J)	H	=	-26863.3	(J)	S	=	4.34	(J/K)	V	=	0.72	(cc)	Cp	=	2.32	(J/K)
	albite	anorthite	sanidine
	29.9	69.32	0.78
spinel	mass	=	0.48	(gm)	density	=	4.71	(gm/cc)	(analysis	in	mole	%)
	Fe''1.13Mg0.21Fe'''1.09Al0.22Cr0.00Ti0.34O4
	G	=	-3874.56	(J)	H	=	-2673.5	(J)	S	=	0.96	(J/K)	V	=	0.1	(cc)	Cp	=	0.44	(J/K)
	chromite	hercynite	magnetite	spinel	ulvospinel
	0	-9.56	54.62	20.73	34.21
apatite	mass	=	0.09	(gm)	density	=	3.06	(gm/cc)
	Ca5(PO4)3OH
	G	=	-1387.09	(J)	H	=	-1132.59	(J)	S	=	0.2	(J/K)	V	=	0.03	(cc)	Cp	=	0.11	(J/K)
water	mass	=	0.58	(gm)	density	=	0.18	(gm/cc)
	H2O
	G	=	-14042.2	(J)	H	=	-6751.12	(J)	S	=	5.82	(J/K)	V	=	3.22	(cc)	Cp	=	1.81	(J/K)
Total	solids	mass	=	3.71	(gm)	density	=	0.87	(gm/cc)
	G	=	-61550.5	(J)	H	=	-45618.4	(J)	S	=	12.71	(J/K)	V	=	4.27	(cc)	Cp	=	5.42	(J/K)
Summary	of	all	fractionated	phases:	(total	mass	=	39.63	grams)
clinopyroxene	mass	=	22.12	(gm)	density	=	3.32	(gm/cc)	(analysis	in	mole	%)
	cpx	Na0.02Ca0.88Fe''0.20Mg0.72Fe'''0.08Ti0.07Al0.28Si1.76O6
	G	=	-341606	(J)	H	=	-282156	(J)	S	=	47.44	(J/K)	V	=	6.67	(cc)	Cp	=	25.29	(J/K)
	diopside	clinoenstatit	hedenbergite	alumino-buffo	buffonite	essenite	jadeite
	43.64	10.4	20.16	16.6	-2.47	10.15	1.52
feldspar	mass	=	4.86	(gm)	density	=	2.68	(gm/cc)	(analysis	in	mole	%)
	K0.01Na0.25Ca0.74Al1.74Si2.26O8
	G	=	-81905.5	(J)	H	=	-68169.1	(J)	S	=	10.96	(J/K)	V	=	1.82	(cc)	Cp	=	5.87	(J/K)
	albite	anorthite	sanidine
	24.95	74.42	0.63
spinel	mass	=	12.2	(gm)	density	=	4.56	(gm/cc)	(analysis	in	mole	%)
	Fe''1.13Mg0.37Fe'''0.78Al0.21Cr0.00Ti0.51O4
	G	=	-108469	(J)	H	=	-77151.7	(J)	S	=	24.99	(J/K)	V	=	2.68	(cc)	Cp	=	11.51	(J/K)
	chromite	hercynite	magnetite	spinel	ulvospinel
	0	-27.1	39.07	37.4	50.63
apatite	mass	=	0.45	(gm)	density	=	3.06	(gm/cc)
	Ca5(PO4)3OH
	G	=	-6735.96	(J)	H	=	-5500.03	(J)	S	=	0.99	(J/K)	V	=	0.15	(cc)	Cp	=	0.51	(J/K)
Viscosity	of	the	System:	4.85	(log	10	poise)
System	mass	=	98.73	(gm)	density	=	2.5	(gm/cc)
	G	=	-1.50132e+06	(J)	H	=	-1.18804e+06	(J)	S	=	249.99	(J/K)	V	=	39.55	(cc)	Cp	=	127.87	(J/K)
Oxygen	delta	moles	=	0.00928931	delta	grams	=	0.297247
	G	=	-2634.1	(J)	H	=	293.99	(J)	S	=	2.34	(J/K)	V	=	967.86	(cc)	Cp	=	0.33	(J/K)
**********----------**********
Title:	Dummy	Title
T	=	970	(C)	P	=	1	(kbars)	log(10)	f	O2	=	-11.28	delta	HM	=	-5.58	NNO	=	-0.59	QFM	=	0	COH	=	1.9	IW	=	3.83
Constraint	Flags:	fO2	path	=	QFM	Fractionate	Solids
Liquid	mass	=	52.53	(gm)	density	=	2.3	(gm/cc)	viscosity	=	3.64	(log	10	poise)	(analysis	in	wt	%)
	G	=	-855262	(J)	H	=	-675503	(J)	S	=	144.6	(J/K)	V	=	22.82	(cc)	Cp	=	74.96	(J/K)
	SiO2	TiO2	Al2O3	Fe2O3	Cr2O3	FeO	MnO	MgO	NiO	CoO	CaO	Na2O	K2O	P2O5	H2O	CO2	SO3	Cl2O-1	F2O-1
	57.64	0.49	17.1	1.15	0	4.58	0.48	1.52	0	0	5.29	4.67	2.38	0.86	3.85	0	0	0	0
clinopyroxene	mass	=	0.53	(gm)	density	=	3.31	(gm/cc)	(analysis	in	mole	%)
	cpx	Na0.02Ca0.81Fe''0.27Mg0.75Fe'''0.06Ti0.03Al0.22Si1.84O6
	G	=	-8060.52	(J)	H	=	-6658.03	(J)	S	=	1.13	(J/K)	V	=	0.16	(cc)	Cp	=	0.6	(J/K)
	diopside	clinoenstatit	hedenbergite	alumino-buffo	buffonite	essenite	jadeite
	39.02	16.48	26.91	9.63	-4.2	10.11	2.05
feldspar	mass	=	1.78	(gm)	density	=	2.66	(gm/cc)	(analysis	in	mole	%)
	K0.01Na0.33Ca0.66Al1.66Si2.34O8
	G	=	-29893.8	(J)	H	=	-24901.3	(J)	S	=	4.02	(J/K)	V	=	0.67	(cc)	Cp	=	2.15	(J/K)
	albite	anorthite	sanidine
	33.18	65.92	0.9
spinel	mass	=	0.41	(gm)	density	=	4.72	(gm/cc)	(analysis	in	mole	%)
	Fe''1.13Mg0.20Fe'''1.13Al0.22Cr0.00Ti0.33O4
	G	=	-3331.91	(J)	H	=	-2302.06	(J)	S	=	0.83	(J/K)	V	=	0.09	(cc)	Cp	=	0.38	(J/K)
	chromite	hercynite	magnetite	spinel	ulvospinel
	0	-8.89	56.42	19.9	32.56
apatite	mass	=	0.08	(gm)	density	=	3.06	(gm/cc)
	Ca5(PO4)3OH
	G	=	-1182.31	(J)	H	=	-967.69	(J)	S	=	0.17	(J/K)	V	=	0.03	(cc)	Cp	=	0.09	(J/K)
water	mass	=	0.67	(gm)	density	=	0.18	(gm/cc)
	H2O
	G	=	-16155.1	(J)	H	=	-7820.22	(J)	S	=	6.7	(J/K)	V	=	3.68	(cc)	Cp	=	2.11	(J/K)
Total	solids	mass	=	3.46	(gm)	density	=	0.75	(gm/cc)
	G	=	-58623.7	(J)	H	=	-42649.3	(J)	S	=	12.85	(J/K)	V	=	4.62	(cc)	Cp	=	5.33	(J/K)
Summary	of	all	fractionated	phases:	(total	mass	=	42.75	grams)
clinopyroxene	mass	=	22.77	(gm)	density	=	3.32	(gm/cc)	(analysis	in	mole	%)
	cpx	Na0.02Ca0.88Fe''0.20Mg0.72Fe'''0.08Ti0.07Al0.28Si1.76O6
	G	=	-351028	(J)	H	=	-290585	(J)	S	=	48.62	(J/K)	V	=	6.86	(cc)	Cp	=	26.01	(J/K)
	diopside	clinoenstatit	hedenbergite	alumino-buffo	buffonite	essenite	jadeite
	43.55	10.52	20.31	16.44	-2.52	10.16	1.53
feldspar	mass	=	6.77	(gm)	density	=	2.67	(gm/cc)	(analysis	in	mole	%)
	K0.01Na0.26Ca0.73Al1.73Si2.27O8
	G	=	-114010	(J)	H	=	-95075.8	(J)	S	=	15.23	(J/K)	V	=	2.53	(cc)	Cp	=	8.18	(J/K)
	albite	anorthite	sanidine
	26.35	72.98	0.67
spinel	mass	=	12.68	(gm)	density	=	4.57	(gm/cc)	(analysis	in	mole	%)
	Fe''1.13Mg0.37Fe'''0.79Al0.21Cr0.00Ti0.50O4
	G	=	-112069	(J)	H	=	-79930.4	(J)	S	=	25.85	(J/K)	V	=	2.78	(cc)	Cp	=	11.94	(J/K)
	chromite	hercynite	magnetite	spinel	ulvospinel
	0	-26.46	39.63	36.79	50.04
apatite	mass	=	0.53	(gm)	density	=	3.06	(gm/cc)
	Ca5(PO4)3OH
	G	=	-8035.53	(J)	H	=	-6576.87	(J)	S	=	1.17	(J/K)	V	=	0.17	(cc)	Cp	=	0.61	(J/K)
Viscosity	of	the	System:	5.3	(log	10	poise)
System	mass	=	98.74	(gm)	density	=	2.48	(gm/cc)
	G	=	-1.49903e+06	(J)	H	=	-1.19032e+06	(J)	S	=	248.33	(J/K)	V	=	39.79	(cc)	Cp	=	127.02	(J/K)
Oxygen	delta	moles	=	0.00965686	delta	grams	=	0.309008
	G	=	-2714.05	(J)	H	=	302.16	(J)	S	=	2.43	(J/K)	V	=	998.13	(cc)	Cp	=	0.35	(J/K)
**********----------**********
Title:	Dummy	Title
T	=	960	(C)	P	=	1	(kbars)	log(10)	f	O2	=	-11.44	delta	HM	=	-5.58	NNO	=	-0.59	QFM	=	0	COH	=	1.89	IW	=	3.85
Constraint	Flags:	fO2	path	=	QFM	Fractionate	Solids
Liquid	mass	=	49.37	(gm)	density	=	2.29	(gm/cc)	viscosity	=	3.79	(log	10	poise)	(analysis	in	wt	%)
	G	=	-804397	(J)	H	=	-637335	(J)	S	=	135.48	(J/K)	V	=	21.54	(cc)	Cp	=	70.2	(J/K)
	SiO2	TiO2	Al2O3	Fe2O3	Cr2O3	FeO	MnO	MgO	NiO	CoO	CaO	Na2O	K2O	P2O5	H2O	CO2	SO3	Cl2O-1	F2O-1
	58.63	0.45	16.77	1.09	0	4.24	0.49	1.38	0	0	4.94	4.77	2.52	0.84	3.87	0	0	0	0
olivine	mass	=	0.38	(gm)	density	=	3.6	(gm/cc)	(analysis	in	mole	%)
	(Ca0.00Mg0.59Fe''0.39Mn0.02Co0.00Ni0.00)2SiO4
	G	=	-4977.79	(J)	H	=	-3965.95	(J)	S	=	0.82	(J/K)	V	=	0.11	(cc)	Cp	=	0.43	(J/K)
	tephroite	fayalite	co-olivine	ni-olivine	monticellite	forsterite
	2.07	39.18	0	0	0.71	58.04
feldspar	mass	=	2.28	(gm)	density	=	2.65	(gm/cc)	(analysis	in	mole	%)
	K0.01Na0.37Ca0.62Al1.62Si2.38O8
	G	=	-38292.1	(J)	H	=	-31950.1	(J)	S	=	5.14	(J/K)	V	=	0.86	(cc)	Cp	=	2.76	(J/K)
	albite	anorthite	sanidine
	36.57	62.39	1.04
spinel	mass	=	0.33	(gm)	density	=	4.74	(gm/cc)	(analysis	in	mole	%)
	Fe''1.13Mg0.19Fe'''1.15Al0.21Cr0.00Ti0.32O4
	G	=	-2586.62	(J)	H	=	-1788.51	(J)	S	=	0.65	(J/K)	V	=	0.07	(cc)	Cp	=	0.3	(J/K)
	chromite	hercynite	magnetite	spinel	ulvospinel
	0	-8.21	57.63	18.66	31.92
apatite	mass	=	0.09	(gm)	density	=	3.06	(gm/cc)
	Ca5(PO4)3OH
	G	=	-1292.06	(J)	H	=	-1060.04	(J)	S	=	0.19	(J/K)	V	=	0.03	(cc)	Cp	=	0.1	(J/K)
water	mass	=	0.78	(gm)	density	=	0.18	(gm/cc)
	H2O
	G	=	-18658.9	(J)	H	=	-9094.3	(J)	S	=	7.76	(J/K)	V	=	4.21	(cc)	Cp	=	2.45	(J/K)
Total	solids	mass	=	3.85	(gm)	density	=	0.73	(gm/cc)
	G	=	-65807.5	(J)	H	=	-47858.9	(J)	S	=	14.56	(J/K)	V	=	5.28	(cc)	Cp	=	6.04	(J/K)
Summary	of	all	fractionated	phases:	(total	mass	=	45.53	grams)
clinopyroxene	mass	=	23.29	(gm)	density	=	3.32	(gm/cc)	(analysis	in	mole	%)
	cpx	Na0.02Ca0.88Fe''0.20Mg0.72Fe'''0.08Ti0.07Al0.28Si1.76O6
	G	=	-358558	(J)	H	=	-297480	(J)	S	=	49.53	(J/K)	V	=	7.02	(cc)	Cp	=	26.58	(J/K)
	diopside	clinoenstatit	hedenbergite	alumino-buffo	buffonite	essenite	jadeite
	43.45	10.65	20.46	16.29	-2.56	10.16	1.54
feldspar	mass	=	8.55	(gm)	density	=	2.67	(gm/cc)	(analysis	in	mole	%)
	K0.01Na0.28Ca0.72Al1.72Si2.28O8
	G	=	-143666	(J)	H	=	-120042	(J)	S	=	19.16	(J/K)	V	=	3.2	(cc)	Cp	=	10.31	(J/K)
	albite	anorthite	sanidine
	27.77	71.51	0.72
spinel	mass	=	13.09	(gm)	density	=	4.57	(gm/cc)	(analysis	in	mole	%)
	Fe''1.13Mg0.36Fe'''0.80Al0.21Cr0.00Ti0.50O4
	G	=	-115118	(J)	H	=	-82341.4	(J)	S	=	26.58	(J/K)	V	=	2.86	(cc)	Cp	=	12.3	(J/K)
	chromite	hercynite	magnetite	spinel	ulvospinel
	0	-25.92	40.15	36.27	49.5
apatite	mass	=	0.61	(gm)	density	=	3.06	(gm/cc)
	Ca5(PO4)3OH
	G	=	-9128.87	(J)	H	=	-7489.59	(J)	S	=	1.33	(J/K)	V	=	0.2	(cc)	Cp	=	0.69	(J/K)
Viscosity	of	the	System:	6.04	(log	10	poise)
System	mass	=	98.75	(gm)	density	=	2.46	(gm/cc)
	G	=	-1.49668e+06	(J)	H	=	-1.19255e+06	(J)	S	=	246.63	(J/K)	V	=	40.09	(cc)	Cp	=	126.13	(J/K)
Oxygen	delta	moles	=	0.00987719	delta	grams	=	0.316058
	G	=	-2751.17	(J)	H	=	305.52	(J)	S	=	2.48	(J/K)	V	=	1012.69	(cc)	Cp	=	0.35	(J/K)
**********----------**********
Title:	Dummy	Title
T	=	950	(C)	P	=	1	(kbars)	log(10)	f	O2	=	-11.6	delta	HM	=	-5.59	NNO	=	-0.58	QFM	=	0	COH	=	1.87	IW	=	3.87
Constraint	Flags:	fO2	path	=	QFM	Fractionate	Solids
Liquid	mass	=	46.48	(gm)	density	=	2.28	(gm/cc)	viscosity	=	3.93	(log	10	poise)	(analysis	in	wt	%)
	G	=	-757816	(J)	H	=	-602321	(J)	S	=	127.13	(J/K)	V	=	20.36	(cc)	Cp	=	65.86	(J/K)
	SiO2	TiO2	Al2O3	Fe2O3	Cr2O3	FeO	MnO	MgO	NiO	CoO	CaO	Na2O	K2O	P2O5	H2O	CO2	SO3	Cl2O-1	F2O-1
	59.59	0.41	16.43	1.03	0	3.91	0.51	1.25	0	0	4.61	4.86	2.67	0.83	3.9	0	0	0	0
olivine	mass	=	0.35	(gm)	density	=	3.62	(gm/cc)	(analysis	in	mole	%)
	(Ca0.00Mg0.57Fe''0.41Mn0.02Co0.00Ni0.00)2SiO4
	G	=	-4449.51	(J)	H	=	-3546.81	(J)	S	=	0.74	(J/K)	V	=	0.1	(cc)	Cp	=	0.38	(J/K)
	tephroite	fayalite	co-olivine	ni-olivine	monticellite	forsterite
	2.33	40.66	0	0	0.69	56.32
feldspar	mass	=	2.11	(gm)	density	=	2.65	(gm/cc)	(analysis	in	mole	%)
	K0.01Na0.40Ca0.59Al1.59Si2.41O8
	G	=	-35366.7	(J)	H	=	-29558.2	(J)	S	=	4.75	(J/K)	V	=	0.8	(cc)	Cp	=	2.55	(J/K)
	albite	anorthite	sanidine
	40.04	58.75	1.21
spinel	mass	=	0.27	(gm)	density	=	4.75	(gm/cc)	(analysis	in	mole	%)
	Fe''1.14Mg0.17Fe'''1.18Al0.20Cr0.00Ti0.31O4
	G	=	-2148.27	(J)	H	=	-1486.89	(J)	S	=	0.54	(J/K)	V	=	0.06	(cc)	Cp	=	0.25	(J/K)
	chromite	hercynite	magnetite	spinel	ulvospinel
	0	-7.55	58.76	17.47	31.33
apatite	mass	=	0.07	(gm)	density	=	3.06	(gm/cc)
	Ca5(PO4)3OH
	G	=	-1125.79	(J)	H	=	-925.83	(J)	S	=	0.16	(J/K)	V	=	0.02	(cc)	Cp	=	0.09	(J/K)
water	mass	=	0.88	(gm)	density	=	0.19	(gm/cc)
	H2O
	G	=	-20981.5	(J)	H	=	-10296.7	(J)	S	=	8.74	(J/K)	V	=	4.7	(cc)	Cp	=	2.78	(J/K)
Total	solids	mass	=	3.68	(gm)	density	=	0.65	(gm/cc)
	G	=	-64071.8	(J)	H	=	-45814.4	(J)	S	=	14.93	(J/K)	V	=	5.68	(cc)	Cp	=	6.05	(J/K)
Summary	of	all	fractionated	phases:	(total	mass	=	48.59	grams)
olivine	mass	=	0.38	(gm)	density	=	3.6	(gm/cc)	(analysis	in	mole	%)
	(Ca0.00Mg0.59Fe''0.39Mn0.02Co0.00Ni0.00)2SiO4
	G	=	-4947.95	(J)	H	=	-3952.93	(J)	S	=	0.81	(J/K)	V	=	0.11	(cc)	Cp	=	0.43	(J/K)
	tephroite	fayalite	co-olivine	ni-olivine	monticellite	forsterite
	2.07	39.18	0	0	0.71	58.04
clinopyroxene	mass	=	23.29	(gm)	density	=	3.32	(gm/cc)	(analysis	in	mole	%)
	cpx	Na0.02Ca0.88Fe''0.20Mg0.72Fe'''0.08Ti0.07Al0.28Si1.76O6
	G	=	-358064	(J)	H	=	-297746	(J)	S	=	49.31	(J/K)	V	=	7.02	(cc)	Cp	=	26.55	(J/K)
	diopside	clinoenstatit	hedenbergite	alumino-buffo	buffonite	essenite	jadeite
	43.45	10.65	20.46	16.29	-2.56	10.16	1.54
feldspar	mass	=	10.82	(gm)	density	=	2.67	(gm/cc)	(analysis	in	mole	%)
	K0.01Na0.30Ca0.70Al1.70Si2.30O8
	G	=	-181671	(J)	H	=	-152084	(J)	S	=	24.19	(J/K)	V	=	4.05	(cc)	Cp	=	13.05	(J/K)
	albite	anorthite	sanidine
	29.63	69.58	0.79
spinel	mass	=	13.41	(gm)	density	=	4.58	(gm/cc)	(analysis	in	mole	%)
	Fe''1.13Mg0.36Fe'''0.81Al0.21Cr0.00Ti0.49O4
	G	=	-117417	(J)	H	=	-84242.2	(J)	S	=	27.12	(J/K)	V	=	2.93	(cc)	Cp	=	12.58	(J/K)
	chromite	hercynite	magnetite	spinel	ulvospinel
	0	-25.51	40.56	35.86	49.09
apatite	mass	=	0.69	(gm)	density	=	3.06	(gm/cc)
	Ca5(PO4)3OH
	G	=	-10330.4	(J)	H	=	-8495.52	(J)	S	=	1.5	(J/K)	V	=	0.22	(cc)	Cp	=	0.79	(J/K)
Viscosity	of	the	System:	8.04	(log	10	poise)
System	mass	=	98.75	(gm)	density	=	2.45	(gm/cc)
	G	=	-1.49432e+06	(J)	H	=	-1.19466e+06	(J)	S	=	244.99	(J/K)	V	=	40.37	(cc)	Cp	=	125.32	(J/K)
Oxygen	delta	moles	=	0.0100567	delta	grams	=	0.321802
	G	=	-2775.94	(J)	H	=	307.48	(J)	S	=	2.52	(J/K)	V	=	1022.73	(cc)	Cp	=	0.36	(J/K)
**********----------**********
Title:	Dummy	Title
T	=	940	(C)	P	=	1	(kbars)	log(10)	f	O2	=	-11.77	delta	HM	=	-5.59	NNO	=	-0.58	QFM	=	0	COH	=	1.86	IW	=	3.88
Constraint	Flags:	fO2	path	=	QFM	Fractionate	Solids
Liquid	mass	=	43.6	(gm)	density	=	2.27	(gm/cc)	viscosity	=	4.07	(log	10	poise)	(analysis	in	wt	%)
	G	=	-710982	(J)	H	=	-566812	(J)	S	=	118.84	(J/K)	V	=	19.17	(cc)	Cp	=	61.56	(J/K)
	SiO2	TiO2	Al2O3	Fe2O3	Cr2O3	FeO	MnO	MgO	NiO	CoO	CaO	Na2O	K2O	P2O5	H2O	CO2	SO3	Cl2O-1	F2O-1
	60.48	0.37	16.12	0.97	0	3.61	0.54	1.08	0	0	4.29	4.95	2.83	0.82	3.92	0	0	0	0
orthopyroxene	mass	=	0.45	(gm)	density	=	3.4	(gm/cc)	(analysis	in	mole	%)
	opx	Na0.00Ca0.06Fe''0.66Mg1.22Fe'''0.02Ti0.00Al0.09Si1.94O6
	G	=	-6528.82	(J)	H	=	-5346.21	(J)	S	=	0.97	(J/K)	V	=	0.13	(cc)	Cp	=	0.54	(J/K)
	diopside	clinoenstatit	hedenbergite	alumino-buffo	buffonite	essenite	jadeite
	-66.23	93.97	66.45	3.63	-3.36	5.37	0.16
feldspar	mass	=	2.02	(gm)	density	=	2.64	(gm/cc)	(analysis	in	mole	%)
	K0.01Na0.44Ca0.55Al1.55Si2.45O8
	G	=	-33861.7	(J)	H	=	-28347.2	(J)	S	=	4.55	(J/K)	V	=	0.76	(cc)	Cp	=	2.45	(J/K)
	albite	anorthite	sanidine
	43.59	55	1.41
spinel	mass	=	0.25	(gm)	density	=	4.77	(gm/cc)	(analysis	in	mole	%)
	Fe''1.15Mg0.16Fe'''1.20Al0.19Cr0.00Ti0.31O4
	G	=	-1963.56	(J)	H	=	-1359.83	(J)	S	=	0.5	(J/K)	V	=	0.05	(cc)	Cp	=	0.23	(J/K)
	chromite	hercynite	magnetite	spinel	ulvospinel
	0	-6.58	60.08	16	30.5
apatite	mass	=	0.07	(gm)	density	=	3.06	(gm/cc)
	Ca5(PO4)3OH
	G	=	-1071.95	(J)	H	=	-883.65	(J)	S	=	0.16	(J/K)	V	=	0.02	(cc)	Cp	=	0.08	(J/K)
water	mass	=	0.98	(gm)	density	=	0.19	(gm/cc)
	H2O
	G	=	-23297.2	(J)	H	=	-11512	(J)	S	=	9.72	(J/K)	V	=	5.18	(cc)	Cp	=	3.12	(J/K)
Total	solids	mass	=	3.77	(gm)	density	=	0.61	(gm/cc)
	G	=	-66723.2	(J)	H	=	-47448.9	(J)	S	=	15.89	(J/K)	V	=	6.15	(cc)	Cp	=	6.41	(J/K)
Summary	of	all	fractionated	phases:	(total	mass	=	51.38	grams)
olivine	mass	=	0.73	(gm)	density	=	3.61	(gm/cc)	(analysis	in	mole	%)
	(Ca0.00Mg0.58Fe''0.40Mn0.02Co0.00Ni0.00)2SiO4
	G	=	-9360.46	(J)	H	=	-7490.63	(J)	S	=	1.54	(J/K)	V	=	0.2	(cc)	Cp	=	0.81	(J/K)
	tephroite	fayalite	co-olivine	ni-olivine	monticellite	forsterite
	2.19	39.88	0	0	0.7	57.23
clinopyroxene	mass	=	23.29	(gm)	density	=	3.32	(gm/cc)	(analysis	in	mole	%)
	cpx	Na0.02Ca0.88Fe''0.20Mg0.72Fe'''0.08Ti0.07Al0.28Si1.76O6
	G	=	-357572	(J)	H	=	-298011	(J)	S	=	49.1	(J/K)	V	=	7.01	(cc)	Cp	=	26.53	(J/K)
	diopside	clinoenstatit	hedenbergite	alumino-buffo	buffonite	essenite	jadeite
	43.45	10.65	20.46	16.29	-2.56	10.16	1.54
feldspar	mass	=	12.93	(gm)	density	=	2.67	(gm/cc)	(analysis	in	mole	%)
	K0.01Na0.31Ca0.68Al1.68Si2.32O8
	G	=	-216705	(J)	H	=	-181759	(J)	S	=	28.81	(J/K)	V	=	4.85	(cc)	Cp	=	15.58	(J/K)
	albite	anorthite	sanidine
	31.33	67.81	0.86
spinel	mass	=	13.68	(gm)	density	=	4.58	(gm/cc)	(analysis	in	mole	%)
	Fe''1.13Mg0.36Fe'''0.82Al0.21Cr0.00Ti0.49O4
	G	=	-119273	(J)	H	=	-85843.9	(J)	S	=	27.56	(J/K)	V	=	2.99	(cc)	Cp	=	12.82	(J/K)
	chromite	hercynite	magnetite	spinel	ulvospinel
	0	-25.16	40.9	35.51	48.75
apatite	mass	=	0.76	(gm)	density	=	3.06	(gm/cc)
	Ca5(PO4)3OH
	G	=	-11364.2	(J)	H	=	-9367.96	(J)	S	=	1.65	(J/K)	V	=	0.25	(cc)	Cp	=	0.86	(J/K)
Viscosity	of	the	System	cannot	be	computed.
System	mass	=	98.76	(gm)	density	=	2.43	(gm/cc)
	G	=	-1.49198e+06	(J)	H	=	-1.19673e+06	(J)	S	=	243.37	(J/K)	V	=	40.62	(cc)	Cp	=	124.57	(J/K)
Oxygen	delta	moles	=	0.0102419	delta	grams	=	0.327729
	G	=	-2801.42	(J)	H	=	309.49	(J)	S	=	2.56	(J/K)	V	=	1033.05	(cc)	Cp	=	0.37	(J/K)
**********----------**********
Title:	Dummy	Title
T	=	930	(C)	P	=	1	(kbars)	log(10)	f	O2	=	-11.93	delta	HM	=	-5.59	NNO	=	-0.57	QFM	=	0	COH	=	1.85	IW	=	3.9
Constraint	Flags:	fO2	path	=	QFM	Fractionate	Solids
Liquid	mass	=	41.11	(gm)	density	=	2.27	(gm/cc)	viscosity	=	4.21	(log	10	poise)	(analysis	in	wt	%)
	G	=	-670262	(J)	H	=	-535972	(J)	S	=	111.62	(J/K)	V	=	18.13	(cc)	Cp	=	57.84	(J/K)
	SiO2	TiO2	Al2O3	Fe2O3	Cr2O3	FeO	MnO	MgO	NiO	CoO	CaO	Na2O	K2O	P2O5	H2O	CO2	SO3	Cl2O-1	F2O-1
	61.3	0.34	15.81	0.92	0	3.34	0.58	0.96	0	0	4	5.02	2.99	0.82	3.94	0	0	0	0
orthopyroxene	mass	=	0.33	(gm)	density	=	3.41	(gm/cc)	(analysis	in	mole	%)
	opx	Na0.00Ca0.06Fe''0.69Mg1.20Fe'''0.02Ti0.00Al0.09Si1.94O6
	G	=	-4717.74	(J)	H	=	-3869.29	(J)	S	=	0.71	(J/K)	V	=	0.1	(cc)	Cp	=	0.39	(J/K)
	diopside	clinoenstatit	hedenbergite	alumino-buffo	buffonite	essenite	jadeite
	-68.88	94.3	68.89	3.54	-3.29	5.28	0.16
feldspar	mass	=	1.82	(gm)	density	=	2.64	(gm/cc)	(analysis	in	mole	%)
	K0.02Na0.47Ca0.51Al1.51Si2.49O8
	G	=	-30388.4	(J)	H	=	-25482.3	(J)	S	=	4.08	(J/K)	V	=	0.69	(cc)	Cp	=	2.2	(J/K)
	albite	anorthite	sanidine
	47.03	51.33	1.64
spinel	mass	=	0.22	(gm)	density	=	4.79	(gm/cc)	(analysis	in	mole	%)
	Fe''1.15Mg0.15Fe'''1.23Al0.18Cr0.00Ti0.30O4
	G	=	-1695.53	(J)	H	=	-1175.42	(J)	S	=	0.43	(J/K)	V	=	0.05	(cc)	Cp	=	0.2	(J/K)
	chromite	hercynite	magnetite	spinel	ulvospinel
	0	-5.83	61.44	14.83	29.57
apatite	mass	=	0.06	(gm)	density	=	3.06	(gm/cc)
	Ca5(PO4)3OH
	G	=	-867.09	(J)	H	=	-716.47	(J)	S	=	0.13	(J/K)	V	=	0.02	(cc)	Cp	=	0.07	(J/K)
water	mass	=	1.07	(gm)	density	=	0.19	(gm/cc)
	H2O
	G	=	-25330.8	(J)	H	=	-12603.3	(J)	S	=	10.58	(J/K)	V	=	5.58	(cc)	Cp	=	3.42	(J/K)
Total	solids	mass	=	3.49	(gm)	density	=	0.54	(gm/cc)
	G	=	-62999.5	(J)	H	=	-43846.8	(J)	S	=	15.92	(J/K)	V	=	6.43	(cc)	Cp	=	6.28	(J/K)
Summary	of	all	fractionated	phases:	(total	mass	=	54.17	grams)
olivine	mass	=	0.73	(gm)	density	=	3.61	(gm/cc)	(analysis	in	mole	%)
	(Ca0.00Mg0.58Fe''0.40Mn0.02Co0.00Ni0.00)2SiO4
	G	=	-9345.08	(J)	H	=	-7498.7	(J)	S	=	1.53	(J/K)	V	=	0.2	(cc)	Cp	=	0.81	(J/K)
	tephroite	fayalite	co-olivine	ni-olivine	monticellite	forsterite
	2.19	39.88	0	0	0.7	57.23
orthopyroxene	mass	=	0.45	(gm)	density	=	3.4	(gm/cc)	(analysis	in	mole	%)
	opx	Na0.00Ca0.06Fe''0.66Mg1.22Fe'''0.02Ti0.00Al0.09Si1.94O6
	G	=	-6486.94	(J)	H	=	-5325.17	(J)	S	=	0.97	(J/K)	V	=	0.13	(cc)	Cp	=	0.53	(J/K)
	diopside	clinoenstatit	hedenbergite	alumino-buffo	buffonite	essenite	jadeite
	-66.23	93.97	66.45	3.63	-3.36	5.37	0.16
clinopyroxene	mass	=	23.29	(gm)	density	=	3.32	(gm/cc)	(analysis	in	mole	%)
	cpx	Na0.02Ca0.88Fe''0.20Mg0.72Fe'''0.08Ti0.07Al0.28Si1.76O6
	G	=	-357082	(J)	H	=	-298276	(J)	S	=	48.88	(J/K)	V	=	7.01	(cc)	Cp	=	26.5	(J/K)
	diopside	clinoenstatit	hedenbergite	alumino-buffo	buffonite	essenite	jadeite
	43.45	10.65	20.46	16.29	-2.56	10.16	1.54
feldspar	mass	=	14.94	(gm)	density	=	2.66	(gm/cc)	(analysis	in	mole	%)
	K0.01Na0.33Ca0.66Al1.66Si2.34O8
	G	=	-250190	(J)	H	=	-210248	(J)	S	=	33.2	(J/K)	V	=	5.61	(cc)	Cp	=	18	(J/K)
	albite	anorthite	sanidine
	33	66.07	0.93
spinel	mass	=	13.93	(gm)	density	=	4.59	(gm/cc)	(analysis	in	mole	%)
	Fe''1.13Mg0.35Fe'''0.82Al0.21Cr0.00Ti0.48O4
	G	=	-120941	(J)	H	=	-87320.8	(J)	S	=	27.94	(J/K)	V	=	3.04	(cc)	Cp	=	13.03	(J/K)
	chromite	hercynite	magnetite	spinel	ulvospinel
	0	-24.84	41.24	35.17	48.43
apatite	mass	=	0.82	(gm)	density	=	3.06	(gm/cc)
	Ca5(PO4)3OH
	G	=	-12343	(J)	H	=	-10198.9	(J)	S	=	1.78	(J/K)	V	=	0.27	(cc)	Cp	=	0.94	(J/K)
Viscosity	of	the	System	cannot	be	computed.
System	mass	=	98.76	(gm)	density	=	2.42	(gm/cc)
	G	=	-1.48965e+06	(J)	H	=	-1.19869e+06	(J)	S	=	241.83	(J/K)	V	=	40.82	(cc)	Cp	=	123.93	(J/K)
Oxygen	delta	moles	=	0.0104115	delta	grams	=	0.333155
	G	=	-2821.74	(J)	H	=	310.9	(J)	S	=	2.6	(J/K)	V	=	1041.5	(cc)	Cp	=	0.37	(J/K)
**********----------**********
Title:	Dummy	Title
T	=	920	(C)	P	=	1	(kbars)	log(10)	f	O2	=	-12.1	delta	HM	=	-5.6	NNO	=	-0.57	QFM	=	0	COH	=	1.83	IW	=	3.92
Constraint	Flags:	fO2	path	=	QFM	Fractionate	Solids
Liquid	mass	=	38.83	(gm)	density	=	2.26	(gm/cc)	viscosity	=	4.34	(log	10	poise)	(analysis	in	wt	%)
	G	=	-633061	(J)	H	=	-507761	(J)	S	=	105.02	(J/K)	V	=	17.17	(cc)	Cp	=	54.46	(J/K)
	SiO2	TiO2	Al2O3	Fe2O3	Cr2O3	FeO	MnO	MgO	NiO	CoO	CaO	Na2O	K2O	P2O5	H2O	CO2	SO3	Cl2O-1	F2O-1
	62.08	0.3	15.49	0.87	0	3.08	0.61	0.86	0	0	3.73	5.06	3.16	0.82	3.95	0	0	0	0
orthopyroxene	mass	=	0.28	(gm)	density	=	3.42	(gm/cc)	(analysis	in	mole	%)
	opx	Na0.00Ca0.05Fe''0.71Mg1.18Fe'''0.02Ti0.00Al0.09Si1.95O6
	G	=	-3945.04	(J)	H	=	-3240.69	(J)	S	=	0.59	(J/K)	V	=	0.08	(cc)	Cp	=	0.33	(J/K)
	diopside	clinoenstatit	hedenbergite	alumino-buffo	buffonite	essenite	jadeite
	-71.59	94.65	71.36	3.45	-3.23	5.2	0.16
feldspar	mass	=	1.69	(gm)	density	=	2.63	(gm/cc)	(analysis	in	mole	%)
	K0.02Na0.50Ca0.48Al1.48Si2.52O8
	G	=	-28222	(J)	H	=	-23705.8	(J)	S	=	3.79	(J/K)	V	=	0.64	(cc)	Cp	=	2.04	(J/K)
	albite	anorthite	sanidine
	50.39	47.7	1.91
spinel	mass	=	0.19	(gm)	density	=	4.8	(gm/cc)	(analysis	in	mole	%)
	Fe''1.15Mg0.14Fe'''1.26Al0.17Cr0.00Ti0.29O4
	G	=	-1449.89	(J)	H	=	-1006.39	(J)	S	=	0.37	(J/K)	V	=	0.04	(cc)	Cp	=	0.17	(J/K)
	chromite	hercynite	magnetite	spinel	ulvospinel
	0	-5.16	62.76	13.76	28.64
apatite	mass	=	0.05	(gm)	density	=	3.06	(gm/cc)
	Ca5(PO4)3OH
	G	=	-742.64	(J)	H	=	-615.09	(J)	S	=	0.11	(J/K)	V	=	0.02	(cc)	Cp	=	0.06	(J/K)
water	mass	=	1.15	(gm)	density	=	0.19	(gm/cc)
	H2O
	G	=	-27204.5	(J)	H	=	-13629.3	(J)	S	=	11.38	(J/K)	V	=	5.94	(cc)	Cp	=	3.71	(J/K)
Total	solids	mass	=	3.36	(gm)	density	=	0.5	(gm/cc)
	G	=	-61564.2	(J)	H	=	-42197.3	(J)	S	=	16.23	(J/K)	V	=	6.72	(cc)	Cp	=	6.31	(J/K)
Summary	of	all	fractionated	phases:	(total	mass	=	56.58	grams)
olivine	mass	=	0.73	(gm)	density	=	3.61	(gm/cc)	(analysis	in	mole	%)
	(Ca0.00Mg0.58Fe''0.40Mn0.02Co0.00Ni0.00)2SiO4
	G	=	-9329.77	(J)	H	=	-7506.76	(J)	S	=	1.53	(J/K)	V	=	0.2	(cc)	Cp	=	0.81	(J/K)
	tephroite	fayalite	co-olivine	ni-olivine	monticellite	forsterite
	2.19	39.88	0	0	0.7	57.23
orthopyroxene	mass	=	0.78	(gm)	density	=	3.4	(gm/cc)	(analysis	in	mole	%)
	opx	Na0.00Ca0.06Fe''0.67Mg1.21Fe'''0.02Ti0.00Al0.09Si1.94O6
	G	=	-11156	(J)	H	=	-9177.34	(J)	S	=	1.66	(J/K)	V	=	0.23	(cc)	Cp	=	0.92	(J/K)
	diopside	clinoenstatit	hedenbergite	alumino-buffo	buffonite	essenite	jadeite
	-67.35	94.11	67.48	3.59	-3.33	5.34	0.16
clinopyroxene	mass	=	23.29	(gm)	density	=	3.32	(gm/cc)	(analysis	in	mole	%)
	cpx	Na0.02Ca0.88Fe''0.20Mg0.72Fe'''0.08Ti0.07Al0.28Si1.76O6
	G	=	-356595	(J)	H	=	-298541	(J)	S	=	48.66	(J/K)	V	=	7.01	(cc)	Cp	=	26.47	(J/K)
	diopside	clinoenstatit	hedenbergite	alumino-buffo	buffonite	essenite	jadeite
	43.45	10.65	20.46	16.29	-2.56	10.16	1.54
feldspar	mass	=	16.76	(gm)	density	=	2.66	(gm/cc)	(analysis	in	mole	%)
	K0.01Na0.35Ca0.64Al1.64Si2.36O8
	G	=	-280163	(J)	H	=	-235893	(J)	S	=	37.1	(J/K)	V	=	6.3	(cc)	Cp	=	20.17	(J/K)
	albite	anorthite	sanidine
	34.53	64.46	1.01
spinel	mass	=	14.15	(gm)	density	=	4.59	(gm/cc)	(analysis	in	mole	%)
	Fe''1.13Mg0.35Fe'''0.83Al0.21Cr0.00Ti0.48O4
	G	=	-122337	(J)	H	=	-88615.3	(J)	S	=	28.26	(J/K)	V	=	3.08	(cc)	Cp	=	13.21	(J/K)
	chromite	hercynite	magnetite	spinel	ulvospinel
	0	-24.56	41.54	34.87	48.15
apatite	mass	=	0.88	(gm)	density	=	3.06	(gm/cc)
	Ca5(PO4)3OH
	G	=	-13115.9	(J)	H	=	-10863.2	(J)	S	=	1.89	(J/K)	V	=	0.29	(cc)	Cp	=	1	(J/K)
Viscosity	of	the	System	cannot	be	computed.
System	mass	=	98.77	(gm)	density	=	2.41	(gm/cc)
	G	=	-1.48732e+06	(J)	H	=	-1.20056e+06	(J)	S	=	240.34	(J/K)	V	=	41	(cc)	Cp	=	123.35	(J/K)
Oxygen	delta	moles	=	0.0105593	delta	grams	=	0.337884
	G	=	-2835.4	(J)	H	=	311.55	(J)	S	=	2.64	(J/K)	V	=	1047.5	(cc)	Cp	=	0.38	(J/K)
**********----------**********
Title:	Dummy	Title
T	=	910	(C)	P	=	1	(kbars)	log(10)	f	O2	=	-12.28	delta	HM	=	-5.6	NNO	=	-0.56	QFM	=	0	COH	=	1.81	IW	=	3.93
Constraint	Flags:	fO2	path	=	QFM	Fractionate	Solids
Liquid	mass	=	36.74	(gm)	density	=	2.26	(gm/cc)	viscosity	=	4.47	(log	10	poise)	(analysis	in	wt	%)
	G	=	-598811	(J)	H	=	-481747	(J)	S	=	98.94	(J/K)	V	=	16.28	(cc)	Cp	=	51.36	(J/K)
	SiO2	TiO2	Al2O3	Fe2O3	Cr2O3	FeO	MnO	MgO	NiO	CoO	CaO	Na2O	K2O	P2O5	H2O	CO2	SO3	Cl2O-1	F2O-1
	62.83	0.28	15.17	0.81	0	2.83	0.64	0.76	0	0	3.48	5.08	3.32	0.82	3.96	0	0	0	0
orthopyroxene	mass	=	0.24	(gm)	density	=	3.43	(gm/cc)	(analysis	in	mole	%)
	opx	Na0.00Ca0.05Fe''0.74Mg1.16Fe'''0.02Ti0.00Al0.09Si1.95O6
	G	=	-3323.36	(J)	H	=	-2734.33	(J)	S	=	0.5	(J/K)	V	=	0.07	(cc)	Cp	=	0.28	(J/K)
	diopside	clinoenstatit	hedenbergite	alumino-buffo	buffonite	essenite	jadeite
	-74.34	95.01	73.86	3.36	-3.17	5.11	0.16
feldspar	mass	=	1.58	(gm)	density	=	2.62	(gm/cc)	(analysis	in	mole	%)
	K0.02Na0.54Ca0.44Al1.44Si2.56O8
	G	=	-26383.8	(J)	H	=	-22199.8	(J)	S	=	3.54	(J/K)	V	=	0.6	(cc)	Cp	=	1.91	(J/K)
	albite	anorthite	sanidine
	53.64	44.14	2.22
spinel	mass	=	0.17	(gm)	density	=	4.82	(gm/cc)	(analysis	in	mole	%)
	Fe''1.15Mg0.13Fe'''1.28Al0.16Cr0.00Ti0.28O4
	G	=	-1245.82	(J)	H	=	-865.99	(J)	S	=	0.32	(J/K)	V	=	0.03	(cc)	Cp	=	0.15	(J/K)
	chromite	hercynite	magnetite	spinel	ulvospinel
	0	-4.56	64.05	12.79	27.73
apatite	mass	=	0.04	(gm)	density	=	3.06	(gm/cc)
	Ca5(PO4)3OH
	G	=	-638.42	(J)	H	=	-530.01	(J)	S	=	0.09	(J/K)	V	=	0.01	(cc)	Cp	=	0.05	(J/K)
water	mass	=	1.23	(gm)	density	=	0.2	(gm/cc)
	H2O
	G	=	-28942.7	(J)	H	=	-14600.7	(J)	S	=	12.12	(J/K)	V	=	6.27	(cc)	Cp	=	3.99	(J/K)
Total	solids	mass	=	3.25	(gm)	density	=	0.47	(gm/cc)
	G	=	-60534.1	(J)	H	=	-40930.8	(J)	S	=	16.57	(J/K)	V	=	6.99	(cc)	Cp	=	6.38	(J/K)
Summary	of	all	fractionated	phases:	(total	mass	=	58.77	grams)
olivine	mass	=	0.73	(gm)	density	=	3.61	(gm/cc)	(analysis	in	mole	%)
	(Ca0.00Mg0.58Fe''0.40Mn0.02Co0.00Ni0.00)2SiO4
	G	=	-9314.53	(J)	H	=	-7514.82	(J)	S	=	1.52	(J/K)	V	=	0.2	(cc)	Cp	=	0.8	(J/K)
	tephroite	fayalite	co-olivine	ni-olivine	monticellite	forsterite
	2.19	39.88	0	0	0.7	57.23
orthopyroxene	mass	=	1.05	(gm)	density	=	3.41	(gm/cc)	(analysis	in	mole	%)
	opx	Na0.00Ca0.06Fe''0.68Mg1.20Fe'''0.02Ti0.00Al0.09Si1.94O6
	G	=	-15046.7	(J)	H	=	-12404.2	(J)	S	=	2.23	(J/K)	V	=	0.31	(cc)	Cp	=	1.24	(J/K)
	diopside	clinoenstatit	hedenbergite	alumino-buffo	buffonite	essenite	jadeite
	-68.45	94.25	68.49	3.56	-3.3	5.3	0.16
clinopyroxene	mass	=	23.29	(gm)	density	=	3.33	(gm/cc)	(analysis	in	mole	%)
	cpx	Na0.02Ca0.88Fe''0.20Mg0.72Fe'''0.08Ti0.07Al0.28Si1.76O6
	G	=	-356109	(J)	H	=	-298806	(J)	S	=	48.43	(J/K)	V	=	7	(cc)	Cp	=	26.45	(J/K)
	diopside	clinoenstatit	hedenbergite	alumino-buffo	buffonite	essenite	jadeite
	43.45	10.65	20.46	16.29	-2.56	10.16	1.54
feldspar	mass	=	18.44	(gm)	density	=	2.66	(gm/cc)	(analysis	in	mole	%)
	K0.01Na0.36Ca0.63Al1.63Si2.37O8
	G	=	-307934	(J)	H	=	-259782	(J)	S	=	40.7	(J/K)	V	=	6.94	(cc)	Cp	=	22.19	(J/K)
	albite	anorthite	sanidine
	35.99	62.92	1.09
spinel	mass	=	14.34	(gm)	density	=	4.6	(gm/cc)	(analysis	in	mole	%)
	Fe''1.13Mg0.35Fe'''0.84Al0.21Cr0.00Ti0.48O4
	G	=	-123486	(J)	H	=	-89742.4	(J)	S	=	28.52	(J/K)	V	=	3.12	(cc)	Cp	=	13.37	(J/K)
	chromite	hercynite	magnetite	spinel	ulvospinel
	0	-24.31	41.81	34.6	47.91
apatite	mass	=	0.92	(gm)	density	=	3.06	(gm/cc)
	Ca5(PO4)3OH
	G	=	-13763.7	(J)	H	=	-11426.6	(J)	S	=	1.98	(J/K)	V	=	0.3	(cc)	Cp	=	1.05	(J/K)
Viscosity	of	the	System	cannot	be	computed.
System	mass	=	98.77	(gm)	density	=	2.4	(gm/cc)
	G	=	-1.485e+06	(J)	H	=	-1.20235e+06	(J)	S	=	238.89	(J/K)	V	=	41.14	(cc)	Cp	=	122.84	(J/K)
Oxygen	delta	moles	=	0.0106884	delta	grams	=	0.342016
	G	=	-2843.4	(J)	H	=	311.56	(J)	S	=	2.67	(J/K)	V	=	1051.42	(cc)	Cp	=	0.38	(J/K)
**********----------**********
Title:	Dummy	Title
T	=	900	(C)	P	=	1	(kbars)	log(10)	f	O2	=	-12.45	delta	HM	=	-5.6	NNO	=	-0.56	QFM	=	0	COH	=	1.8	IW	=	3.95
Constraint	Flags:	fO2	path	=	QFM	Fractionate	Solids
Liquid	mass	=	34.81	(gm)	density	=	2.25	(gm/cc)	viscosity	=	4.59	(log	10	poise)	(analysis	in	wt	%)
	G	=	-567074	(J)	H	=	-457598	(J)	S	=	93.32	(J/K)	V	=	15.46	(cc)	Cp	=	48.51	(J/K)
	SiO2	TiO2	Al2O3	Fe2O3	Cr2O3	FeO	MnO	MgO	NiO	CoO	CaO	Na2O	K2O	P2O5	H2O	CO2	SO3	Cl2O-1	F2O-1
	63.55	0.25	14.85	0.77	0	2.61	0.68	0.68	0	0	3.26	5.09	3.48	0.83	3.97	0	0	0	0
orthopyroxene	mass	=	0.2	(gm)	density	=	3.44	(gm/cc)	(analysis	in	mole	%)
	opx	Na0.00Ca0.04Fe''0.76Mg1.14Fe'''0.02Ti0.00Al0.08Si1.95O6
	G	=	-2817.56	(J)	H	=	-2321.86	(J)	S	=	0.42	(J/K)	V	=	0.06	(cc)	Cp	=	0.23	(J/K)
	diopside	clinoenstatit	hedenbergite	alumino-buffo	buffonite	essenite	jadeite
	-77.13	95.38	76.39	3.28	-3.11	5.03	0.16
feldspar	mass	=	1.49	(gm)	density	=	2.62	(gm/cc)	(analysis	in	mole	%)
	K0.03Na0.57Ca0.41Al1.41Si2.59O8
	G	=	-24797.3	(J)	H	=	-20901.1	(J)	S	=	3.32	(J/K)	V	=	0.57	(cc)	Cp	=	1.8	(J/K)
	albite	anorthite	sanidine
	56.75	40.67	2.58
spinel	mass	=	0.14	(gm)	density	=	4.83	(gm/cc)	(analysis	in	mole	%)
	Fe''1.15Mg0.12Fe'''1.31Al0.16Cr0.00Ti0.27O4
	G	=	-1074.21	(J)	H	=	-747.92	(J)	S	=	0.28	(J/K)	V	=	0.03	(cc)	Cp	=	0.13	(J/K)
	chromite	hercynite	magnetite	spinel	ulvospinel
	0	-4.04	65.3	11.89	26.84
apatite	mass	=	0.04	(gm)	density	=	3.06	(gm/cc)
	Ca5(PO4)3OH
	G	=	-549.75	(J)	H	=	-457.47	(J)	S	=	0.08	(J/K)	V	=	0.01	(cc)	Cp	=	0.04	(J/K)
water	mass	=	1.3	(gm)	density	=	0.2	(gm/cc)
	H2O
	G	=	-30563.6	(J)	H	=	-15525.6	(J)	S	=	12.82	(J/K)	V	=	6.56	(cc)	Cp	=	4.26	(J/K)
Total	solids	mass	=	3.17	(gm)	density	=	0.44	(gm/cc)
	G	=	-59802.4	(J)	H	=	-39953.9	(J)	S	=	16.92	(J/K)	V	=	7.23	(cc)	Cp	=	6.47	(J/K)
Summary	of	all	fractionated	phases:	(total	mass	=	60.79	grams)
olivine	mass	=	0.73	(gm)	density	=	3.61	(gm/cc)	(analysis	in	mole	%)
	(Ca0.00Mg0.58Fe''0.40Mn0.02Co0.00Ni0.00)2SiO4
	G	=	-9299.35	(J)	H	=	-7522.86	(J)	S	=	1.51	(J/K)	V	=	0.2	(cc)	Cp	=	0.8	(J/K)
	tephroite	fayalite	co-olivine	ni-olivine	monticellite	forsterite
	2.19	39.88	0	0	0.7	57.23
orthopyroxene	mass	=	1.29	(gm)	density	=	3.42	(gm/cc)	(analysis	in	mole	%)
	opx	Na0.00Ca0.05Fe''0.69Mg1.19Fe'''0.02Ti0.00Al0.09Si1.94O6
	G	=	-18311.1	(J)	H	=	-15127.5	(J)	S	=	2.71	(J/K)	V	=	0.38	(cc)	Cp	=	1.51	(J/K)
	diopside	clinoenstatit	hedenbergite	alumino-buffo	buffonite	essenite	jadeite
	-69.51	94.39	69.46	3.52	-3.28	5.27	0.16
clinopyroxene	mass	=	23.29	(gm)	density	=	3.33	(gm/cc)	(analysis	in	mole	%)
	cpx	Na0.02Ca0.88Fe''0.20Mg0.72Fe'''0.08Ti0.07Al0.28Si1.76O6
	G	=	-355626	(J)	H	=	-299070	(J)	S	=	48.21	(J/K)	V	=	7	(cc)	Cp	=	26.42	(J/K)
	diopside	clinoenstatit	hedenbergite	alumino-buffo	buffonite	essenite	jadeite
	43.45	10.65	20.46	16.29	-2.56	10.16	1.54
feldspar	mass	=	20.02	(gm)	density	=	2.66	(gm/cc)	(analysis	in	mole	%)
	K0.01Na0.37Ca0.61Al1.61Si2.39O8
	G	=	-333834	(J)	H	=	-282184	(J)	S	=	44.03	(J/K)	V	=	7.54	(cc)	Cp	=	24.07	(J/K)
	albite	anorthite	sanidine
	37.4	61.42	1.18
spinel	mass	=	14.5	(gm)	density	=	4.6	(gm/cc)	(analysis	in	mole	%)
	Fe''1.13Mg0.34Fe'''0.84Al0.21Cr0.00Ti0.48O4
	G	=	-124428	(J)	H	=	-90730.7	(J)	S	=	28.72	(J/K)	V	=	3.15	(cc)	Cp	=	13.5	(J/K)
	chromite	hercynite	magnetite	spinel	ulvospinel
	0	-24.1	42.05	34.37	47.69
apatite	mass	=	0.96	(gm)	density	=	3.06	(gm/cc)
	Ca5(PO4)3OH
	G	=	-14306.6	(J)	H	=	-11905.2	(J)	S	=	2.05	(J/K)	V	=	0.31	(cc)	Cp	=	1.09	(J/K)
Viscosity	of	the	System	cannot	be	computed.
System	mass	=	98.78	(gm)	density	=	2.39	(gm/cc)
	G	=	-1.48268e+06	(J)	H	=	-1.20409e+06	(J)	S	=	237.47	(J/K)	V	=	41.27	(cc)	Cp	=	122.37	(J/K)
Oxygen	delta	moles	=	0.0108013	delta	grams	=	0.345629
	G	=	-2846.51	(J)	H	=	311.01	(J)	S	=	2.69	(J/K)	V	=	1053.55	(cc)	Cp	=	0.38	(J/K)
**********----------**********
Title:	Dummy	Title
T	=	890	(C)	P	=	1	(kbars)	log(10)	f	O2	=	-12.63	delta	HM	=	-5.61	NNO	=	-0.56	QFM	=	0	COH	=	1.78	IW	=	3.97
Constraint	Flags:	fO2	path	=	QFM	Fractionate	Solids
Liquid	mass	=	33.02	(gm)	density	=	2.25	(gm/cc)	viscosity	=	4.71	(log	10	poise)	(analysis	in	wt	%)
	G	=	-537507	(J)	H	=	-435054	(J)	S	=	88.08	(J/K)	V	=	14.69	(cc)	Cp	=	45.86	(J/K)
	SiO2	TiO2	Al2O3	Fe2O3	Cr2O3	FeO	MnO	MgO	NiO	CoO	CaO	Na2O	K2O	P2O5	H2O	CO2	SO3	Cl2O-1	F2O-1
	64.24	0.23	14.52	0.72	0	2.39	0.72	0.61	0	0	3.05	5.07	3.65	0.84	3.97	0	0	0	0
orthopyroxene	mass	=	0.17	(gm)	density	=	3.45	(gm/cc)	(analysis	in	mole	%)
	opx	Na0.00Ca0.04Fe''0.79Mg1.12Fe'''0.02Ti0.00Al0.08Si1.95O6
	G	=	-2402.14	(J)	H	=	-1982.67	(J)	S	=	0.36	(J/K)	V	=	0.05	(cc)	Cp	=	0.2	(J/K)
	diopside	clinoenstatit	hedenbergite	alumino-buffo	buffonite	essenite	jadeite
	-79.95	95.74	78.95	3.2	-3.05	4.94	0.16
feldspar	mass	=	1.41	(gm)	density	=	2.61	(gm/cc)	(analysis	in	mole	%)
	K0.03Na0.60Ca0.37Al1.37Si2.63O8
	G	=	-23409	(J)	H	=	-19765.5	(J)	S	=	3.13	(J/K)	V	=	0.54	(cc)	Cp	=	1.7	(J/K)
	albite	anorthite	sanidine
	59.7	37.29	3.01
spinel	mass	=	0.13	(gm)	density	=	4.84	(gm/cc)	(analysis	in	mole	%)
	Fe''1.15Mg0.11Fe'''1.33Al0.15Cr0.00Ti0.26O4
	G	=	-928.49	(J)	H	=	-647.62	(J)	S	=	0.24	(J/K)	V	=	0.03	(cc)	Cp	=	0.11	(J/K)
	chromite	hercynite	magnetite	spinel	ulvospinel
	0	-3.57	66.5	11.07	26
apatite	mass	=	0.03	(gm)	density	=	3.06	(gm/cc)
	Ca5(PO4)3OH
	G	=	-473.29	(J)	H	=	-394.77	(J)	S	=	0.07	(J/K)	V	=	0.01	(cc)	Cp	=	0.04	(J/K)
water	mass	=	1.37	(gm)	density	=	0.2	(gm/cc)
	H2O
	G	=	-32081.6	(J)	H	=	-16410.2	(J)	S	=	13.47	(J/K)	V	=	6.82	(cc)	Cp	=	4.52	(J/K)
Total	solids	mass	=	3.11	(gm)	density	=	0.42	(gm/cc)
	G	=	-59294.5	(J)	H	=	-39200.7	(J)	S	=	17.28	(J/K)	V	=	7.45	(cc)	Cp	=	6.57	(J/K)
Summary	of	all	fractionated	phases:	(total	mass	=	62.65	grams)
olivine	mass	=	0.73	(gm)	density	=	3.62	(gm/cc)	(analysis	in	mole	%)
	(Ca0.00Mg0.58Fe''0.40Mn0.02Co0.00Ni0.00)2SiO4
	G	=	-9284.24	(J)	H	=	-7530.89	(J)	S	=	1.51	(J/K)	V	=	0.2	(cc)	Cp	=	0.8	(J/K)
	tephroite	fayalite	co-olivine	ni-olivine	monticellite	forsterite
	2.19	39.88	0	0	0.7	57.23
orthopyroxene	mass	=	1.49	(gm)	density	=	3.42	(gm/cc)	(analysis	in	mole	%)
	opx	Na0.00Ca0.05Fe''0.70Mg1.19Fe'''0.02Ti0.00Al0.09Si1.95O6
	G	=	-21065.7	(J)	H	=	-17440.6	(J)	S	=	3.12	(J/K)	V	=	0.43	(cc)	Cp	=	1.74	(J/K)
	diopside	clinoenstatit	hedenbergite	alumino-buffo	buffonite	essenite	jadeite
	-70.52	94.52	70.38	3.49	-3.26	5.23	0.16
clinopyroxene	mass	=	23.29	(gm)	density	=	3.33	(gm/cc)	(analysis	in	mole	%)
	cpx	Na0.02Ca0.88Fe''0.20Mg0.72Fe'''0.08Ti0.07Al0.28Si1.76O6
	G	=	-355145	(J)	H	=	-299334	(J)	S	=	47.98	(J/K)	V	=	7	(cc)	Cp	=	26.39	(J/K)
	diopside	clinoenstatit	hedenbergite	alumino-buffo	buffonite	essenite	jadeite
	43.45	10.65	20.46	16.29	-2.56	10.16	1.54
feldspar	mass	=	21.51	(gm)	density	=	2.65	(gm/cc)	(analysis	in	mole	%)
	K0.01Na0.39Ca0.60Al1.60Si2.40O8
	G	=	-358117	(J)	H	=	-303304	(J)	S	=	47.12	(J/K)	V	=	8.1	(cc)	Cp	=	25.84	(J/K)
	albite	anorthite	sanidine
	38.75	59.97	1.28
spinel	mass	=	14.65	(gm)	density	=	4.6	(gm/cc)	(analysis	in	mole	%)
	Fe''1.13Mg0.34Fe'''0.85Al0.20Cr0.00Ti0.47O4
	G	=	-125198	(J)	H	=	-91602.2	(J)	S	=	28.88	(J/K)	V	=	3.18	(cc)	Cp	=	13.62	(J/K)
	chromite	hercynite	magnetite	spinel	ulvospinel
	0	-23.91	42.26	34.16	47.49
apatite	mass	=	0.99	(gm)	density	=	3.06	(gm/cc)
	Ca5(PO4)3OH
	G	=	-14760.3	(J)	H	=	-12311.6	(J)	S	=	2.11	(J/K)	V	=	0.32	(cc)	Cp	=	1.12	(J/K)
Viscosity	of	the	System	cannot	be	computed.
System	mass	=	98.78	(gm)	density	=	2.39	(gm/cc)
	G	=	-1.48037e+06	(J)	H	=	-1.20578e+06	(J)	S	=	236.08	(J/K)	V	=	41.38	(cc)	Cp	=	121.95	(J/K)
Oxygen	delta	moles	=	0.0109	delta	grams	=	0.348788
	G	=	-2845.37	(J)	H	=	309.98	(J)	S	=	2.71	(J/K)	V	=	1054.12	(cc)	Cp	=	0.39	(J/K)
**********----------**********
Title:	Dummy	Title
T	=	880	(C)	P	=	1	(kbars)	log(10)	f	O2	=	-12.81	delta	HM	=	-5.61	NNO	=	-0.55	QFM	=	0	COH	=	1.77	IW	=	3.99
Constraint	Flags:	fO2	path	=	QFM	Fractionate	Solids
Liquid	mass	=	31.34	(gm)	density	=	2.24	(gm/cc)	viscosity	=	4.84	(log	10	poise)	(analysis	in	wt	%)
	G	=	-509833	(J)	H	=	-413906	(J)	S	=	83.19	(J/K)	V	=	13.96	(cc)	Cp	=	43.4	(J/K)
	SiO2	TiO2	Al2O3	Fe2O3	Cr2O3	FeO	MnO	MgO	NiO	CoO	CaO	Na2O	K2O	P2O5	H2O	CO2	SO3	Cl2O-1	F2O-1
	64.89	0.21	14.19	0.67	0	2.19	0.75	0.54	0	0	2.87	5.03	3.82	0.85	3.96	0	0	0	0
orthopyroxene	mass	=	0.15	(gm)	density	=	3.46	(gm/cc)	(analysis	in	mole	%)
	opx	Na0.00Ca0.04Fe''0.82Mg1.09Fe'''0.02Ti0.00Al0.08Si1.95O6
	G	=	-2058.15	(J)	H	=	-1701.46	(J)	S	=	0.31	(J/K)	V	=	0.04	(cc)	Cp	=	0.17	(J/K)
	diopside	clinoenstatit	hedenbergite	alumino-buffo	buffonite	essenite	jadeite
	-82.78	96.09	81.54	3.12	-2.99	4.86	0.16
feldspar	mass	=	1.34	(gm)	density	=	2.61	(gm/cc)	(analysis	in	mole	%)
	K0.04Na0.62Ca0.34Al1.34Si2.66O8
	G	=	-22180.2	(J)	H	=	-18761.1	(J)	S	=	2.97	(J/K)	V	=	0.51	(cc)	Cp	=	1.62	(J/K)
	albite	anorthite	sanidine
	62.47	34.01	3.52
spinel	mass	=	0.11	(gm)	density	=	4.85	(gm/cc)	(analysis	in	mole	%)
	Fe''1.15Mg0.10Fe'''1.35Al0.14Cr0.00Ti0.25O4
	G	=	-803.74	(J)	H	=	-561.7	(J)	S	=	0.21	(J/K)	V	=	0.02	(cc)	Cp	=	0.1	(J/K)
	chromite	hercynite	magnetite	spinel	ulvospinel
	0	-3.16	67.65	10.31	25.2
apatite	mass	=	0.03	(gm)	density	=	3.06	(gm/cc)
	Ca5(PO4)3OH
	G	=	-406.69	(J)	H	=	-340.01	(J)	S	=	0.06	(J/K)	V	=	0.01	(cc)	Cp	=	0.03	(J/K)
water	mass	=	1.44	(gm)	density	=	0.2	(gm/cc)
	H2O
	G	=	-33508.1	(J)	H	=	-17259.6	(J)	S	=	14.09	(J/K)	V	=	7.05	(cc)	Cp	=	4.77	(J/K)
Total	solids	mass	=	3.06	(gm)	density	=	0.4	(gm/cc)
	G	=	-58956.8	(J)	H	=	-38623.9	(J)	S	=	17.63	(J/K)	V	=	7.64	(cc)	Cp	=	6.69	(J/K)
Summary	of	all	fractionated	phases:	(total	mass	=	64.37	grams)
olivine	mass	=	0.73	(gm)	density	=	3.62	(gm/cc)	(analysis	in	mole	%)
	(Ca0.00Mg0.58Fe''0.40Mn0.02Co0.00Ni0.00)2SiO4
	G	=	-9269.2	(J)	H	=	-7538.91	(J)	S	=	1.5	(J/K)	V	=	0.2	(cc)	Cp	=	0.8	(J/K)
	tephroite	fayalite	co-olivine	ni-olivine	monticellite	forsterite
	2.19	39.88	0	0	0.7	57.23
orthopyroxene	mass	=	1.66	(gm)	density	=	3.42	(gm/cc)	(analysis	in	mole	%)
	opx	Na0.00Ca0.05Fe''0.71Mg1.18Fe'''0.02Ti0.00Al0.09Si1.95O6
	G	=	-23401.7	(J)	H	=	-19416.7	(J)	S	=	3.46	(J/K)	V	=	0.48	(cc)	Cp	=	1.94	(J/K)
	diopside	clinoenstatit	hedenbergite	alumino-buffo	buffonite	essenite	jadeite
	-71.49	94.64	71.25	3.46	-3.24	5.21	0.16
clinopyroxene	mass	=	23.29	(gm)	density	=	3.33	(gm/cc)	(analysis	in	mole	%)
	cpx	Na0.02Ca0.88Fe''0.20Mg0.72Fe'''0.08Ti0.07Al0.28Si1.76O6
	G	=	-354666	(J)	H	=	-299598	(J)	S	=	47.75	(J/K)	V	=	7	(cc)	Cp	=	26.36	(J/K)
	diopside	clinoenstatit	hedenbergite	alumino-buffo	buffonite	essenite	jadeite
	43.45	10.65	20.46	16.29	-2.56	10.16	1.54
feldspar	mass	=	22.91	(gm)	density	=	2.65	(gm/cc)	(analysis	in	mole	%)
	K0.01Na0.40Ca0.59Al1.59Si2.41O8
	G	=	-380984	(J)	H	=	-323306	(J)	S	=	50.02	(J/K)	V	=	8.64	(cc)	Cp	=	27.51	(J/K)
	albite	anorthite	sanidine
	40.05	58.56	1.39
spinel	mass	=	14.77	(gm)	density	=	4.61	(gm/cc)	(analysis	in	mole	%)
	Fe''1.13Mg0.34Fe'''0.85Al0.20Cr0.00Ti0.47O4
	G	=	-125820	(J)	H	=	-92374.6	(J)	S	=	29	(J/K)	V	=	3.21	(cc)	Cp	=	13.71	(J/K)
	chromite	hercynite	magnetite	spinel	ulvospinel
	0	-23.75	42.46	33.97	47.32
apatite	mass	=	1.02	(gm)	density	=	3.06	(gm/cc)
	Ca5(PO4)3OH
	G	=	-15137.3	(J)	H	=	-12655.5	(J)	S	=	2.15	(J/K)	V	=	0.33	(cc)	Cp	=	1.15	(J/K)
Viscosity	of	the	System	cannot	be	computed.
System	mass	=	98.78	(gm)	density	=	2.38	(gm/cc)
	G	=	-1.47807e+06	(J)	H	=	-1.20742e+06	(J)	S	=	234.7	(J/K)	V	=	41.46	(cc)	Cp	=	121.57	(J/K)
Oxygen	delta	moles	=	0.0109862	delta	grams	=	0.351544
	G	=	-2840.53	(J)	H	=	308.53	(J)	S	=	2.73	(J/K)	V	=	1053.31	(cc)	Cp	=	0.39	(J/K)
**********----------**********
Title:	Dummy	Title
T	=	870	(C)	P	=	1	(kbars)	log(10)	f	O2	=	-13	delta	HM	=	-5.61	NNO	=	-0.55	QFM	=	0	COH	=	1.75	IW	=	4.01
Constraint	Flags:	fO2	path	=	QFM	Fractionate	Solids
Liquid	mass	=	29.77	(gm)	density	=	2.24	(gm/cc)	viscosity	=	4.96	(log	10	poise)	(analysis	in	wt	%)
	G	=	-483829	(J)	H	=	-393984	(J)	S	=	78.59	(J/K)	V	=	13.28	(cc)	Cp	=	41.1	(J/K)
	SiO2	TiO2	Al2O3	Fe2O3	Cr2O3	FeO	MnO	MgO	NiO	CoO	CaO	Na2O	K2O	P2O5	H2O	CO2	SO3	Cl2O-1	F2O-1
	65.52	0.2	13.86	0.63	0	2.01	0.79	0.49	0	0	2.71	4.98	3.99	0.87	3.96	0	0	0	0
orthopyroxene	mass	=	0.13	(gm)	density	=	3.47	(gm/cc)	(analysis	in	mole	%)
	opx	Na0.00Ca0.03Fe''0.84Mg1.07Fe'''0.02Ti0.00Al0.08Si1.95O6
	G	=	-1771.23	(J)	H	=	-1466.61	(J)	S	=	0.27	(J/K)	V	=	0.04	(cc)	Cp	=	0.15	(J/K)
	diopside	clinoenstatit	hedenbergite	alumino-buffo	buffonite	essenite	jadeite
	-85.62	96.44	84.14	3.04	-2.92	4.77	0.16
feldspar	mass	=	1.27	(gm)	density	=	2.6	(gm/cc)	(analysis	in	mole	%)
	K0.04Na0.65Ca0.31Al1.31Si2.69O8
	G	=	-21082.6	(J)	H	=	-17864.5	(J)	S	=	2.82	(J/K)	V	=	0.49	(cc)	Cp	=	1.54	(J/K)
	albite	anorthite	sanidine
	65.04	30.83	4.12
spinel	mass	=	0.1	(gm)	density	=	4.86	(gm/cc)	(analysis	in	mole	%)
	Fe''1.15Mg0.10Fe'''1.37Al0.14Cr0.00Ti0.24O4
	G	=	-696.26	(J)	H	=	-487.61	(J)	S	=	0.18	(J/K)	V	=	0.02	(cc)	Cp	=	0.09	(J/K)
	chromite	hercynite	magnetite	spinel	ulvospinel
	0	-2.8	68.74	9.61	24.45
apatite	mass	=	0.02	(gm)	density	=	3.06	(gm/cc)
	Ca5(PO4)3OH
	G	=	-348.31	(J)	H	=	-291.89	(J)	S	=	0.05	(J/K)	V	=	0.01	(cc)	Cp	=	0.03	(J/K)
water	mass	=	1.5	(gm)	density	=	0.21	(gm/cc)
	H2O
	G	=	-34852.1	(J)	H	=	-18077.6	(J)	S	=	14.67	(J/K)	V	=	7.26	(cc)	Cp	=	5.02	(J/K)
Total	solids	mass	=	3.03	(gm)	density	=	0.39	(gm/cc)
	G	=	-58750.5	(J)	H	=	-38188.2	(J)	S	=	17.99	(J/K)	V	=	7.82	(cc)	Cp	=	6.82	(J/K)
Summary	of	all	fractionated	phases:	(total	mass	=	65.99	grams)
olivine	mass	=	0.73	(gm)	density	=	3.62	(gm/cc)	(analysis	in	mole	%)
	(Ca0.00Mg0.58Fe''0.40Mn0.02Co0.00Ni0.00)2SiO4
	G	=	-9254.23	(J)	H	=	-7546.92	(J)	S	=	1.49	(J/K)	V	=	0.2	(cc)	Cp	=	0.8	(J/K)
	tephroite	fayalite	co-olivine	ni-olivine	monticellite	forsterite
	2.19	39.88	0	0	0.7	57.23
orthopyroxene	mass	=	1.8	(gm)	density	=	3.43	(gm/cc)	(analysis	in	mole	%)
	opx	Na0.00Ca0.05Fe''0.72Mg1.17Fe'''0.02Ti0.00Al0.09Si1.95O6
	G	=	-25391	(J)	H	=	-21113.2	(J)	S	=	3.74	(J/K)	V	=	0.53	(cc)	Cp	=	2.11	(J/K)
	diopside	clinoenstatit	hedenbergite	alumino-buffo	buffonite	essenite	jadeite
	-72.39	94.76	72.08	3.43	-3.22	5.18	0.16
clinopyroxene	mass	=	23.29	(gm)	density	=	3.33	(gm/cc)	(analysis	in	mole	%)
	cpx	Na0.02Ca0.88Fe''0.20Mg0.72Fe'''0.08Ti0.07Al0.28Si1.76O6
	G	=	-354190	(J)	H	=	-299862	(J)	S	=	47.53	(J/K)	V	=	6.99	(cc)	Cp	=	26.33	(J/K)
	diopside	clinoenstatit	hedenbergite	alumino-buffo	buffonite	essenite	jadeite
	43.45	10.65	20.46	16.29	-2.56	10.16	1.54
feldspar	mass	=	24.25	(gm)	density	=	2.65	(gm/cc)	(analysis	in	mole	%)
	K0.02Na0.41Ca0.57Al1.57Si2.43O8
	G	=	-402595	(J)	H	=	-342319	(J)	S	=	52.73	(J/K)	V	=	9.15	(cc)	Cp	=	29.09	(J/K)
	albite	anorthite	sanidine
	41.3	57.2	1.51
spinel	mass	=	14.88	(gm)	density	=	4.61	(gm/cc)	(analysis	in	mole	%)
	Fe''1.13Mg0.34Fe'''0.85Al0.20Cr0.00Ti0.47O4
	G	=	-126317	(J)	H	=	-93061.9	(J)	S	=	29.09	(J/K)	V	=	3.23	(cc)	Cp	=	13.79	(J/K)
	chromite	hercynite	magnetite	spinel	ulvospinel
	0	-23.61	42.63	33.81	47.17
apatite	mass	=	1.04	(gm)	density	=	3.06	(gm/cc)
	Ca5(PO4)3OH
	G	=	-15447.3	(J)	H	=	-12944.9	(J)	S	=	2.19	(J/K)	V	=	0.34	(cc)	Cp	=	1.18	(J/K)
Viscosity	of	the	System	cannot	be	computed.
System	mass	=	98.78	(gm)	density	=	2.38	(gm/cc)
	G	=	-1.47577e+06	(J)	H	=	-1.20902e+06	(J)	S	=	233.35	(J/K)	V	=	41.53	(cc)	Cp	=	121.22	(J/K)
Oxygen	delta	moles	=	0.0110611	delta	grams	=	0.353942
	G	=	-2832.43	(J)	H	=	306.72	(J)	S	=	2.75	(J/K)	V	=	1051.3	(cc)	Cp	=	0.39	(J/K)
**********----------**********
Title:	Dummy	Title
T	=	860	(C)	P	=	1	(kbars)	log(10)	f	O2	=	-13.18	delta	HM	=	-5.62	NNO	=	-0.54	QFM	=	0	COH	=	1.73	IW	=	4.03
Constraint	Flags:	fO2	path	=	QFM	Fractionate	Solids
Liquid	mass	=	28.18	(gm)	density	=	2.24	(gm/cc)	viscosity	=	5.1	(log	10	poise)	(analysis	in	wt	%)
	G	=	-457606	(J)	H	=	-373813	(J)	S	=	73.95	(J/K)	V	=	12.58	(cc)	Cp	=	38.76	(J/K)
	SiO2	TiO2	Al2O3	Fe2O3	Cr2O3	FeO	MnO	MgO	NiO	CoO	CaO	Na2O	K2O	P2O5	H2O	CO2	SO3	Cl2O-1	F2O-1
	66.22	0.19	13.53	0.58	0	1.8	0.8	0.42	0	0	2.56	4.9	4.17	0.89	3.94	0	0	0	0
olivine	mass	=	0.17	(gm)	density	=	3.88	(gm/cc)	(analysis	in	mole	%)
	(Ca0.00Mg0.34Fe''0.58Mn0.08Co0.00Ni0.00)2SiO4
	G	=	-1918.11	(J)	H	=	-1525.08	(J)	S	=	0.35	(J/K)	V	=	0.05	(cc)	Cp	=	0.18	(J/K)
	tephroite	fayalite	co-olivine	ni-olivine	monticellite	forsterite
	8.16	57.52	0	0	0.47	33.85
feldspar	mass	=	1.3	(gm)	density	=	2.59	(gm/cc)	(analysis	in	mole	%)
	K0.05Na0.67Ca0.28Al1.28Si2.72O8
	G	=	-21447	(J)	H	=	-18205.7	(J)	S	=	2.86	(J/K)	V	=	0.5	(cc)	Cp	=	1.57	(J/K)
	albite	anorthite	sanidine
	67.5	27.63	4.88
spinel	mass	=	0.04	(gm)	density	=	4.87	(gm/cc)	(analysis	in	mole	%)
	Fe''1.16Mg0.09Fe'''1.37Al0.13Cr0.00Ti0.25O4
	G	=	-306.65	(J)	H	=	-215.41	(J)	S	=	0.08	(J/K)	V	=	0.01	(cc)	Cp	=	0.04	(J/K)
	chromite	hercynite	magnetite	spinel	ulvospinel
	0	-2.62	68.6	8.93	25.1
apatite	mass	=	0.02	(gm)	density	=	3.06	(gm/cc)
	Ca5(PO4)3OH
	G	=	-355.25	(J)	H	=	-298.39	(J)	S	=	0.05	(J/K)	V	=	0.01	(cc)	Cp	=	0.03	(J/K)
water	mass	=	1.57	(gm)	density	=	0.21	(gm/cc)
	H2O
	G	=	-36277.4	(J)	H	=	-18949	(J)	S	=	15.29	(J/K)	V	=	7.48	(cc)	Cp	=	5.29	(J/K)
Total	solids	mass	=	3.11	(gm)	density	=	0.39	(gm/cc)
	G	=	-60304.4	(J)	H	=	-39193.6	(J)	S	=	18.63	(J/K)	V	=	8.04	(cc)	Cp	=	7.1	(J/K)
Summary	of	all	fractionated	phases:	(total	mass	=	67.5	grams)
olivine	mass	=	0.73	(gm)	density	=	3.62	(gm/cc)	(analysis	in	mole	%)
	(Ca0.00Mg0.58Fe''0.40Mn0.02Co0.00Ni0.00)2SiO4
	G	=	-9239.33	(J)	H	=	-7554.91	(J)	S	=	1.49	(J/K)	V	=	0.2	(cc)	Cp	=	0.8	(J/K)
	tephroite	fayalite	co-olivine	ni-olivine	monticellite	forsterite
	2.19	39.88	0	0	0.7	57.23
orthopyroxene	mass	=	1.93	(gm)	density	=	3.43	(gm/cc)	(analysis	in	mole	%)
	opx	Na0.00Ca0.05Fe''0.73Mg1.17Fe'''0.02Ti0.00Al0.09Si1.95O6
	G	=	-27091	(J)	H	=	-22576.4	(J)	S	=	3.98	(J/K)	V	=	0.56	(cc)	Cp	=	2.25	(J/K)
	diopside	clinoenstatit	hedenbergite	alumino-buffo	buffonite	essenite	jadeite
	-73.25	94.87	72.86	3.41	-3.2	5.15	0.16
clinopyroxene	mass	=	23.29	(gm)	density	=	3.33	(gm/cc)	(analysis	in	mole	%)
	cpx	Na0.02Ca0.88Fe''0.20Mg0.72Fe'''0.08Ti0.07Al0.28Si1.76O6
	G	=	-353716	(J)	H	=	-300125	(J)	S	=	47.29	(J/K)	V	=	6.99	(cc)	Cp	=	26.31	(J/K)
	diopside	clinoenstatit	hedenbergite	alumino-buffo	buffonite	essenite	jadeite
	43.45	10.65	20.46	16.29	-2.56	10.16	1.54
feldspar	mass	=	25.52	(gm)	density	=	2.65	(gm/cc)	(analysis	in	mole	%)
	K0.02Na0.42Ca0.56Al1.56Si2.44O8
	G	=	-423083	(J)	H	=	-360451	(J)	S	=	55.27	(J/K)	V	=	9.63	(cc)	Cp	=	30.6	(J/K)
	albite	anorthite	sanidine
	42.49	55.87	1.64
spinel	mass	=	14.98	(gm)	density	=	4.61	(gm/cc)	(analysis	in	mole	%)
	Fe''1.13Mg0.34Fe'''0.86Al0.20Cr0.00Ti0.47O4
	G	=	-126706	(J)	H	=	-93676.1	(J)	S	=	29.15	(J/K)	V	=	3.25	(cc)	Cp	=	13.86	(J/K)
	chromite	hercynite	magnetite	spinel	ulvospinel
	0	-23.48	42.79	33.66	47.03
apatite	mass	=	1.06	(gm)	density	=	3.06	(gm/cc)
	Ca5(PO4)3OH
	G	=	-15698.8	(J)	H	=	-13186.2	(J)	S	=	2.22	(J/K)	V	=	0.35	(cc)	Cp	=	1.19	(J/K)
Viscosity	of	the	System	cannot	be	computed.
System	mass	=	98.78	(gm)	density	=	2.37	(gm/cc)
	G	=	-1473444	(J)	H	=	-1.21058e+06	(J)	S	=	231.98	(J/K)	V	=	41.61	(cc)	Cp	=	120.87	(J/K)
Oxygen	delta	moles	=	0.011047	delta	grams	=	0.35349
	G	=	-2801.41	(J)	H	=	302.42	(J)	S	=	2.74	(J/K)	V	=	1040.78	(cc)	Cp	=	0.39	(J/K)
**********----------**********
Title:	Dummy	Title
T	=	850	(C)	P	=	1	(kbars)	log(10)	f	O2	=	-13.37	delta	HM	=	-5.62	NNO	=	-0.54	QFM	=	0	COH	=	1.72	IW	=	4.05
Constraint	Flags:	fO2	path	=	QFM	Fractionate	Solids
Liquid	mass	=	26.71	(gm)	density	=	2.24	(gm/cc)	viscosity	=	5.23	(log	10	poise)	(analysis	in	wt	%)
	G	=	-433366	(J)	H	=	-355129	(J)	S	=	69.66	(J/K)	V	=	11.94	(cc)	Cp	=	36.62	(J/K)
	SiO2	TiO2	Al2O3	Fe2O3	Cr2O3	FeO	MnO	MgO	NiO	CoO	CaO	Na2O	K2O	P2O5	H2O	CO2	SO3	Cl2O-1	F2O-1
	66.88	0.19	13.19	0.53	0	1.62	0.81	0.37	0	0	2.43	4.8	4.36	0.92	3.91	0	0	0	0
olivine	mass	=	0.14	(gm)	density	=	3.9	(gm/cc)	(analysis	in	mole	%)
	(Ca0.00Mg0.32Fe''0.59Mn0.09Co0.00Ni0.00)2SiO4
	G	=	-1490.11	(J)	H	=	-1185.13	(J)	S	=	0.27	(J/K)	V	=	0.04	(cc)	Cp	=	0.14	(J/K)
	tephroite	fayalite	co-olivine	ni-olivine	monticellite	forsterite
	8.96	58.97	0	0	0.44	31.64
feldspar	mass	=	1.22	(gm)	density	=	2.59	(gm/cc)	(analysis	in	mole	%)
	K0.06Na0.70Ca0.25Al1.25Si2.75O8
	G	=	-20116.4	(J)	H	=	-17106.9	(J)	S	=	2.68	(J/K)	V	=	0.47	(cc)	Cp	=	1.48	(J/K)
	albite	anorthite	sanidine
	69.63	24.57	5.8
spinel	mass	=	0.04	(gm)	density	=	4.88	(gm/cc)	(analysis	in	mole	%)
	Fe''1.17Mg0.08Fe'''1.37Al0.12Cr0.00Ti0.26O4
	G	=	-290.62	(J)	H	=	-204.8	(J)	S	=	0.08	(J/K)	V	=	0.01	(cc)	Cp	=	0.04	(J/K)
	chromite	hercynite	magnetite	spinel	ulvospinel
	0	-2.51	68.53	8.36	25.62
apatite	mass	=	0.02	(gm)	density	=	3.06	(gm/cc)
	Ca5(PO4)3OH
	G	=	-293.82	(J)	H	=	-247.36	(J)	S	=	0.04	(J/K)	V	=	0.01	(cc)	Cp	=	0.02	(J/K)
water	mass	=	1.63	(gm)	density	=	0.21	(gm/cc)
	H2O
	G	=	-37587.4	(J)	H	=	-19771.5	(J)	S	=	15.86	(J/K)	V	=	7.67	(cc)	Cp	=	5.55	(J/K)
Total	solids	mass	=	3.05	(gm)	density	=	0.37	(gm/cc)
	G	=	-59778.4	(J)	H	=	-38515.7	(J)	S	=	18.93	(J/K)	V	=	8.19	(cc)	Cp	=	7.22	(J/K)
Summary	of	all	fractionated	phases:	(total	mass	=	69.02	grams)
olivine	mass	=	0.9	(gm)	density	=	3.67	(gm/cc)	(analysis	in	mole	%)
	(Ca0.00Mg0.54Fe''0.43Mn0.03Co0.00Ni0.00)2SiO4
	G	=	-11120.3	(J)	H	=	-9073.04	(J)	S	=	1.82	(J/K)	V	=	0.24	(cc)	Cp	=	0.98	(J/K)
	tephroite	fayalite	co-olivine	ni-olivine	monticellite	forsterite
	3.26	43.05	0	0	0.66	53.03
orthopyroxene	mass	=	1.93	(gm)	density	=	3.44	(gm/cc)	(analysis	in	mole	%)
	opx	Na0.00Ca0.05Fe''0.73Mg1.17Fe'''0.02Ti0.00Al0.09Si1.95O6
	G	=	-27051.3	(J)	H	=	-22598.9	(J)	S	=	3.96	(J/K)	V	=	0.56	(cc)	Cp	=	2.25	(J/K)
	diopside	clinoenstatit	hedenbergite	alumino-buffo	buffonite	essenite	jadeite
	-73.25	94.87	72.86	3.41	-3.2	5.15	0.16
clinopyroxene	mass	=	23.29	(gm)	density	=	3.33	(gm/cc)	(analysis	in	mole	%)
	cpx	Na0.02Ca0.88Fe''0.20Mg0.72Fe'''0.08Ti0.07Al0.28Si1.76O6
	G	=	-353244	(J)	H	=	-300388	(J)	S	=	47.06	(J/K)	V	=	6.99	(cc)	Cp	=	26.28	(J/K)
	diopside	clinoenstatit	hedenbergite	alumino-buffo	buffonite	essenite	jadeite
	43.45	10.65	20.46	16.29	-2.56	10.16	1.54
feldspar	mass	=	26.81	(gm)	density	=	2.65	(gm/cc)	(analysis	in	mole	%)
	K0.02Na0.44Ca0.54Al1.54Si2.46O8
	G	=	-443911	(J)	H	=	-378939	(J)	S	=	57.85	(J/K)	V	=	10.13	(cc)	Cp	=	32.13	(J/K)
	albite	anorthite	sanidine
	43.72	54.49	1.8
spinel	mass	=	15.02	(gm)	density	=	4.61	(gm/cc)	(analysis	in	mole	%)
	Fe''1.13Mg0.34Fe'''0.86Al0.20Cr0.00Ti0.47O4
	G	=	-126705	(J)	H	=	-94018.8	(J)	S	=	29.1	(J/K)	V	=	3.25	(cc)	Cp	=	13.88	(J/K)
	chromite	hercynite	magnetite	spinel	ulvospinel
	0	-23.43	42.86	33.6	46.97
apatite	mass	=	1.08	(gm)	density	=	3.06	(gm/cc)
	Ca5(PO4)3OH
	G	=	-15957.1	(J)	H	=	-13434.2	(J)	S	=	2.25	(J/K)	V	=	0.35	(cc)	Cp	=	1.21	(J/K)
Viscosity	of	the	System	cannot	be	computed.
System	mass	=	98.78	(gm)	density	=	2.37	(gm/cc)
	G	=	-1.47113e+06	(J)	H	=	-1.2121e+06	(J)	S	=	230.64	(J/K)	V	=	41.66	(cc)	Cp	=	120.56	(J/K)
Oxygen	delta	moles	=	0.0110405	delta	grams	=	0.353282
	G	=	-2772.4	(J)	H	=	298.33	(J)	S	=	2.73	(J/K)	V	=	1030.98	(cc)	Cp	=	0.39	(J/K)
**********----------**********
Title:	Dummy	Title
T	=	840	(C)	P	=	1	(kbars)	log(10)	f	O2	=	-13.57	delta	HM	=	-5.63	NNO	=	-0.53	QFM	=	0	COH	=	1.7	IW	=	4.07
Constraint	Flags:	fO2	path	=	QFM	Fractionate	Solids
Liquid	mass	=	25.31	(gm)	density	=	2.24	(gm/cc)	viscosity	=	5.37	(log	10	poise)	(analysis	in	wt	%)
	G	=	-410305	(J)	H	=	-337292	(J)	S	=	65.59	(J/K)	V	=	11.32	(cc)	Cp	=	34.59	(J/K)
	SiO2	TiO2	Al2O3	Fe2O3	Cr2O3	FeO	MnO	MgO	NiO	CoO	CaO	Na2O	K2O	P2O5	H2O	CO2	SO3	Cl2O-1	F2O-1
	67.51	0.19	12.84	0.49	0	1.45	0.82	0.32	0	0	2.33	4.68	4.54	0.95	3.89	0	0	0	0
olivine	mass	=	0.13	(gm)	density	=	3.93	(gm/cc)	(analysis	in	mole	%)
	(Ca0.00Mg0.30Fe''0.60Mn0.10Co0.00Ni0.00)2SiO4
	G	=	-1356.39	(J)	H	=	-1079.23	(J)	S	=	0.25	(J/K)	V	=	0.03	(cc)	Cp	=	0.13	(J/K)
	tephroite	fayalite	co-olivine	ni-olivine	monticellite	forsterite
	9.8	60.32	0	0	0.41	29.47
feldspar	mass	=	1.17	(gm)	density	=	2.58	(gm/cc)	(analysis	in	mole	%)
	K0.07Na0.71Ca0.22Al1.22Si2.78O8
	G	=	-19274.5	(J)	H	=	-16420.5	(J)	S	=	2.56	(J/K)	V	=	0.45	(cc)	Cp	=	1.42	(J/K)
	albite	anorthite	sanidine
	71.42	21.61	6.97
spinel	mass	=	0.03	(gm)	density	=	4.89	(gm/cc)	(analysis	in	mole	%)
	Fe''1.19Mg0.08Fe'''1.37Al0.11Cr0.00Ti0.26O4
	G	=	-219.61	(J)	H	=	-155.3	(J)	S	=	0.06	(J/K)	V	=	0.01	(cc)	Cp	=	0.03	(J/K)
	chromite	hercynite	magnetite	spinel	ulvospinel
	0	-2.44	68.25	7.84	26.34
apatite	mass	=	0.02	(gm)	density	=	3.06	(gm/cc)
	Ca5(PO4)3OH
	G	=	-260.32	(J)	H	=	-219.67	(J)	S	=	0.04	(J/K)	V	=	0.01	(cc)	Cp	=	0.02	(J/K)
water	mass	=	1.7	(gm)	density	=	0.22	(gm/cc)
	H2O
	G	=	-38832.3	(J)	H	=	-20570.5	(J)	S	=	16.41	(J/K)	V	=	7.84	(cc)	Cp	=	5.8	(J/K)
Total	solids	mass	=	3.04	(gm)	density	=	0.36	(gm/cc)
	G	=	-59943.1	(J)	H	=	-38445.2	(J)	S	=	19.31	(J/K)	V	=	8.34	(cc)	Cp	=	7.4	(J/K)
Summary	of	all	fractionated	phases:	(total	mass	=	70.43	grams)
olivine	mass	=	1.03	(gm)	density	=	3.7	(gm/cc)	(analysis	in	mole	%)
	(Ca0.00Mg0.51Fe''0.45Mn0.04Co0.00Ni0.00)2SiO4
	G	=	-12570.5	(J)	H	=	-10253	(J)	S	=	2.08	(J/K)	V	=	0.28	(cc)	Cp	=	1.11	(J/K)
	tephroite	fayalite	co-olivine	ni-olivine	monticellite	forsterite
	3.96	45	0	0	0.63	50.4
orthopyroxene	mass	=	1.93	(gm)	density	=	3.44	(gm/cc)	(analysis	in	mole	%)
	opx	Na0.00Ca0.05Fe''0.73Mg1.17Fe'''0.02Ti0.00Al0.09Si1.95O6
	G	=	-27011.8	(J)	H	=	-22621.4	(J)	S	=	3.94	(J/K)	V	=	0.56	(cc)	Cp	=	2.25	(J/K)
	diopside	clinoenstatit	hedenbergite	alumino-buffo	buffonite	essenite	jadeite
	-73.25	94.87	72.86	3.41	-3.2	5.15	0.16
clinopyroxene	mass	=	23.29	(gm)	density	=	3.33	(gm/cc)	(analysis	in	mole	%)
	cpx	Na0.02Ca0.88Fe''0.20Mg0.72Fe'''0.08Ti0.07Al0.28Si1.76O6
	G	=	-352775	(J)	H	=	-300650	(J)	S	=	46.83	(J/K)	V	=	6.99	(cc)	Cp	=	26.25	(J/K)
	diopside	clinoenstatit	hedenbergite	alumino-buffo	buffonite	essenite	jadeite
	43.45	10.65	20.46	16.29	-2.56	10.16	1.54
feldspar	mass	=	28.03	(gm)	density	=	2.64	(gm/cc)	(analysis	in	mole	%)
	K0.02Na0.45Ca0.53Al1.53Si2.47O8
	G	=	-463385	(J)	H	=	-396342	(J)	S	=	60.23	(J/K)	V	=	10.6	(cc)	Cp	=	33.57	(J/K)
	albite	anorthite	sanidine
	44.86	53.17	1.97
spinel	mass	=	15.05	(gm)	density	=	4.62	(gm/cc)	(analysis	in	mole	%)
	Fe''1.13Mg0.34Fe'''0.86Al0.20Cr0.00Ti0.47O4
	G	=	-126689	(J)	H	=	-94351	(J)	S	=	29.05	(J/K)	V	=	3.26	(cc)	Cp	=	13.9	(J/K)
	chromite	hercynite	magnetite	spinel	ulvospinel
	0	-23.38	42.92	33.54	46.92
apatite	mass	=	1.09	(gm)	density	=	3.06	(gm/cc)
	Ca5(PO4)3OH
	G	=	-16153.8	(J)	H	=	-13631.3	(J)	S	=	2.27	(J/K)	V	=	0.36	(cc)	Cp	=	1.23	(J/K)
Viscosity	of	the	System	cannot	be	computed.
System	mass	=	98.78	(gm)	density	=	2.37	(gm/cc)
	G	=	-1.46883e+06	(J)	H	=	-1.21359e+06	(J)	S	=	229.3	(J/K)	V	=	41.7	(cc)	Cp	=	120.29	(J/K)
Oxygen	delta	moles	=	0.0110258	delta	grams	=	0.352811
	G	=	-2741.42	(J)	H	=	294.04	(J)	S	=	2.73	(J/K)	V	=	1020.44	(cc)	Cp	=	0.39	(J/K)
**********----------**********
Title:	Dummy	Title
T	=	830	(C)	P	=	1	(kbars)	log(10)	f	O2	=	-13.77	delta	HM	=	-5.63	NNO	=	-0.53	QFM	=	0	COH	=	1.68	IW	=	4.09
Constraint	Flags:	fO2	path	=	QFM	Fractionate	Solids
Liquid	mass	=	23.98	(gm)	density	=	2.23	(gm/cc)	viscosity	=	5.51	(log	10	poise)	(analysis	in	wt	%)
	G	=	-388303	(J)	H	=	-320214	(J)	S	=	61.72	(J/K)	V	=	10.73	(cc)	Cp	=	32.67	(J/K)
	SiO2	TiO2	Al2O3	Fe2O3	Cr2O3	FeO	MnO	MgO	NiO	CoO	CaO	Na2O	K2O	P2O5	H2O	CO2	SO3	Cl2O-1	F2O-1
	68.13	0.19	12.48	0.45	0	1.29	0.82	0.28	0	0	2.25	4.55	4.72	0.98	3.86	0	0	0	0
olivine	mass	=	0.12	(gm)	density	=	3.95	(gm/cc)	(analysis	in	mole	%)
	(Ca0.00Mg0.28Fe''0.62Mn0.11Co0.00Ni0.00)2SiO4
	G	=	-1235.07	(J)	H	=	-983.24	(J)	S	=	0.23	(J/K)	V	=	0.03	(cc)	Cp	=	0.12	(J/K)
	tephroite	fayalite	co-olivine	ni-olivine	monticellite	forsterite
	10.69	61.55	0	0	0.39	27.37
feldspar	mass	=	1.13	(gm)	density	=	2.58	(gm/cc)	(analysis	in	mole	%)
	K0.09Na0.73Ca0.19Al1.19Si2.81O8
	G	=	-18514	(J)	H	=	-15801.1	(J)	S	=	2.46	(J/K)	V	=	0.44	(cc)	Cp	=	1.36	(J/K)
	albite	anorthite	sanidine
	72.76	18.73	8.52
spinel	mass	=	0.02	(gm)	density	=	4.89	(gm/cc)	(analysis	in	mole	%)
	Fe''1.20Mg0.07Fe'''1.36Al0.10Cr0.00Ti0.27O4
	G	=	-159.78	(J)	H	=	-113.41	(J)	S	=	0.04	(J/K)	V	=	0	(cc)	Cp	=	0.02	(J/K)
	chromite	hercynite	magnetite	spinel	ulvospinel
	0	-2.39	67.76	7.34	27.29
apatite	mass	=	0.02	(gm)	density	=	3.06	(gm/cc)
	Ca5(PO4)3OH
	G	=	-235.81	(J)	H	=	-199.45	(J)	S	=	0.03	(J/K)	V	=	0.01	(cc)	Cp	=	0.02	(J/K)
water	mass	=	1.76	(gm)	density	=	0.22	(gm/cc)
	H2O
	G	=	-40014.9	(J)	H	=	-21347.1	(J)	S	=	16.92	(J/K)	V	=	7.98	(cc)	Cp	=	6.06	(J/K)
Total	solids	mass	=	3.04	(gm)	density	=	0.36	(gm/cc)
	G	=	-60159.5	(J)	H	=	-38444.3	(J)	S	=	19.69	(J/K)	V	=	8.46	(cc)	Cp	=	7.58	(J/K)
Summary	of	all	fractionated	phases:	(total	mass	=	71.76	grams)
olivine	mass	=	1.16	(gm)	density	=	3.72	(gm/cc)	(analysis	in	mole	%)
	(Ca0.00Mg0.49Fe''0.47Mn0.05Co0.00Ni0.00)2SiO4
	G	=	-13884.6	(J)	H	=	-11328.4	(J)	S	=	2.32	(J/K)	V	=	0.31	(cc)	Cp	=	1.24	(J/K)
	tephroite	fayalite	co-olivine	ni-olivine	monticellite	forsterite
	4.55	46.55	0	0	0.61	48.29
orthopyroxene	mass	=	1.93	(gm)	density	=	3.44	(gm/cc)	(analysis	in	mole	%)
	opx	Na0.00Ca0.05Fe''0.73Mg1.17Fe'''0.02Ti0.00Al0.09Si1.95O6
	G	=	-26972.4	(J)	H	=	-22643.8	(J)	S	=	3.92	(J/K)	V	=	0.56	(cc)	Cp	=	2.24	(J/K)
	diopside	clinoenstatit	hedenbergite	alumino-buffo	buffonite	essenite	jadeite
	-73.25	94.87	72.86	3.41	-3.2	5.15	0.16
clinopyroxene	mass	=	23.29	(gm)	density	=	3.34	(gm/cc)	(analysis	in	mole	%)
	cpx	Na0.02Ca0.88Fe''0.20Mg0.72Fe'''0.08Ti0.07Al0.28Si1.76O6
	G	=	-352308	(J)	H	=	-300913	(J)	S	=	46.59	(J/K)	V	=	6.98	(cc)	Cp	=	26.22	(J/K)
	diopside	clinoenstatit	hedenbergite	alumino-buffo	buffonite	essenite	jadeite
	43.45	10.65	20.46	16.29	-2.56	10.16	1.54
feldspar	mass	=	29.19	(gm)	density	=	2.64	(gm/cc)	(analysis	in	mole	%)
	K0.02Na0.46Ca0.52Al1.52Si2.48O8
	G	=	-481996	(J)	H	=	-413073	(J)	S	=	62.48	(J/K)	V	=	11.05	(cc)	Cp	=	34.95	(J/K)
	albite	anorthite	sanidine
	45.94	51.89	2.18
spinel	mass	=	15.08	(gm)	density	=	4.62	(gm/cc)	(analysis	in	mole	%)
	Fe''1.13Mg0.33Fe'''0.86Al0.20Cr0.00Ti0.47O4
	G	=	-126603	(J)	H	=	-94634	(J)	S	=	28.98	(J/K)	V	=	3.27	(cc)	Cp	=	13.91	(J/K)
	chromite	hercynite	magnetite	spinel	ulvospinel
	0	-23.34	42.96	33.49	46.89
apatite	mass	=	1.11	(gm)	density	=	3.06	(gm/cc)
	Ca5(PO4)3OH
	G	=	-16317	(J)	H	=	-13800.7	(J)	S	=	2.28	(J/K)	V	=	0.36	(cc)	Cp	=	1.24	(J/K)
Viscosity	of	the	System	cannot	be	computed.
System	mass	=	98.78	(gm)	density	=	2.37	(gm/cc)
	G	=	-1.46654e+06	(J)	H	=	-1.21505e+06	(J)	S	=	227.98	(J/K)	V	=	41.72	(cc)	Cp	=	120.04	(J/K)
Oxygen	delta	moles	=	0.0110045	delta	grams	=	0.352131
	G	=	-2708.94	(J)	H	=	289.59	(J)	S	=	2.72	(J/K)	V	=	1009.33	(cc)	Cp	=	0.39	(J/K)
**********----------**********
Title:	Dummy	Title
T	=	820	(C)	P	=	1	(kbars)	log(10)	f	O2	=	-13.97	delta	HM	=	-5.63	NNO	=	-0.52	QFM	=	0	COH	=	1.66	IW	=	4.11
Constraint	Flags:	fO2	path	=	QFM	Fractionate	Solids
Liquid	mass	=	22.71	(gm)	density	=	2.23	(gm/cc)	viscosity	=	5.64	(log	10	poise)	(analysis	in	wt	%)
	G	=	-367173	(J)	H	=	-303747	(J)	S	=	58.02	(J/K)	V	=	10.17	(cc)	Cp	=	30.82	(J/K)
	SiO2	TiO2	Al2O3	Fe2O3	Cr2O3	FeO	MnO	MgO	NiO	CoO	CaO	Na2O	K2O	P2O5	H2O	CO2	SO3	Cl2O-1	F2O-1
	68.74	0.2	12.12	0.41	0	1.15	0.83	0.25	0	0	2.19	4.39	4.9	1.01	3.82	0	0	0	0
olivine	mass	=	0.11	(gm)	density	=	3.97	(gm/cc)	(analysis	in	mole	%)
	(Ca0.00Mg0.26Fe''0.63Mn0.12Co0.00Ni0.00)2SiO4
	G	=	-1124.9	(J)	H	=	-896.16	(J)	S	=	0.21	(J/K)	V	=	0.03	(cc)	Cp	=	0.11	(J/K)
	tephroite	fayalite	co-olivine	ni-olivine	monticellite	forsterite
	11.63	62.66	0	0	0.36	25.34
feldspar	mass	=	1.09	(gm)	density	=	2.57	(gm/cc)	(analysis	in	mole	%)
	K0.11Na0.73Ca0.16Al1.16Si2.84O8
	G	=	-17899.8	(J)	H	=	-15304.3	(J)	S	=	2.37	(J/K)	V	=	0.42	(cc)	Cp	=	1.32	(J/K)
	albite	anorthite	sanidine
	73.45	15.85	10.69
spinel	mass	=	0.02	(gm)	density	=	4.9	(gm/cc)	(analysis	in	mole	%)
	Fe''1.22Mg0.07Fe'''1.34Al0.09Cr0.00Ti0.28O4
	G	=	-109.92	(J)	H	=	-78.32	(J)	S	=	0.03	(J/K)	V	=	0	(cc)	Cp	=	0.01	(J/K)
	chromite	hercynite	magnetite	spinel	ulvospinel
	0	-2.37	67.02	6.88	28.47
apatite	mass	=	0.02	(gm)	density	=	3.06	(gm/cc)
	Ca5(PO4)3OH
	G	=	-224.05	(J)	H	=	-189.93	(J)	S	=	0.03	(J/K)	V	=	0	(cc)	Cp	=	0.02	(J/K)
water	mass	=	1.81	(gm)	density	=	0.22	(gm/cc)
	H2O
	G	=	-41141.2	(J)	H	=	-22103.8	(J)	S	=	17.42	(J/K)	V	=	8.11	(cc)	Cp	=	6.32	(J/K)
Total	solids	mass	=	3.04	(gm)	density	=	0.36	(gm/cc)
	G	=	-60499.8	(J)	H	=	-38572.5	(J)	S	=	20.06	(J/K)	V	=	8.57	(cc)	Cp	=	7.78	(J/K)
Summary	of	all	fractionated	phases:	(total	mass	=	73.03	grams)
olivine	mass	=	1.28	(gm)	density	=	3.75	(gm/cc)	(analysis	in	mole	%)
	(Ca0.00Mg0.47Fe''0.48Mn0.05Co0.00Ni0.00)2SiO4
	G	=	-15075.4	(J)	H	=	-12309.1	(J)	S	=	2.53	(J/K)	V	=	0.34	(cc)	Cp	=	1.35	(J/K)
	tephroite	fayalite	co-olivine	ni-olivine	monticellite	forsterite
	5.07	47.82	0	0	0.59	46.51
orthopyroxene	mass	=	1.93	(gm)	density	=	3.44	(gm/cc)	(analysis	in	mole	%)
	opx	Na0.00Ca0.05Fe''0.73Mg1.17Fe'''0.02Ti0.00Al0.09Si1.95O6
	G	=	-26933.3	(J)	H	=	-22666.3	(J)	S	=	3.9	(J/K)	V	=	0.56	(cc)	Cp	=	2.24	(J/K)
	diopside	clinoenstatit	hedenbergite	alumino-buffo	buffonite	essenite	jadeite
	-73.25	94.87	72.86	3.41	-3.2	5.15	0.16
clinopyroxene	mass	=	23.29	(gm)	density	=	3.34	(gm/cc)	(analysis	in	mole	%)
	cpx	Na0.02Ca0.88Fe''0.20Mg0.72Fe'''0.08Ti0.07Al0.28Si1.76O6
	G	=	-351843	(J)	H	=	-301175	(J)	S	=	46.35	(J/K)	V	=	6.98	(cc)	Cp	=	26.18	(J/K)
	diopside	clinoenstatit	hedenbergite	alumino-buffo	buffonite	essenite	jadeite
	43.45	10.65	20.46	16.29	-2.56	10.16	1.54
feldspar	mass	=	30.32	(gm)	density	=	2.64	(gm/cc)	(analysis	in	mole	%)
	K0.02Na0.47Ca0.51Al1.51Si2.49O8
	G	=	-499825	(J)	H	=	-429197	(J)	S	=	64.61	(J/K)	V	=	11.48	(cc)	Cp	=	36.28	(J/K)
	albite	anorthite	sanidine
	46.95	50.64	2.41
spinel	mass	=	15.1	(gm)	density	=	4.62	(gm/cc)	(analysis	in	mole	%)
	Fe''1.13Mg0.33Fe'''0.86Al0.20Cr0.00Ti0.47O4
	G	=	-126457	(J)	H	=	-94875.1	(J)	S	=	28.89	(J/K)	V	=	3.27	(cc)	Cp	=	13.91	(J/K)
	chromite	hercynite	magnetite	spinel	ulvospinel
	0	-23.31	43	33.46	46.86
apatite	mass	=	1.12	(gm)	density	=	3.06	(gm/cc)
	Ca5(PO4)3OH
	G	=	-16455.7	(J)	H	=	-13949.9	(J)	S	=	2.29	(J/K)	V	=	0.36	(cc)	Cp	=	1.25	(J/K)
Viscosity	of	the	System	cannot	be	computed.
System	mass	=	98.78	(gm)	density	=	2.37	(gm/cc)
	G	=	-1.46426e+06	(J)	H	=	-1.21649e+06	(J)	S	=	226.66	(J/K)	V	=	41.73	(cc)	Cp	=	119.81	(J/K)
Oxygen	delta	moles	=	0.0109783	delta	grams	=	0.351293
	G	=	-2675.39	(J)	H	=	285.03	(J)	S	=	2.71	(J/K)	V	=	997.79	(cc)	Cp	=	0.39	(J/K)
**********----------**********
Title:	Dummy	Title
T	=	810	(C)	P	=	1	(kbars)	log(10)	f	O2	=	-14.17	delta	HM	=	-5.64	NNO	=	-0.52	QFM	=	0	COH	=	1.64	IW	=	4.13
Constraint	Flags:	fO2	path	=	QFM	Fractionate	Solids
Liquid	mass	=	21.45	(gm)	density	=	2.23	(gm/cc)	viscosity	=	5.78	(log	10	poise)	(analysis	in	wt	%)
	G	=	-346384	(J)	H	=	-287455	(J)	S	=	54.4	(J/K)	V	=	9.6	(cc)	Cp	=	29.02	(J/K)
	SiO2	TiO2	Al2O3	Fe2O3	Cr2O3	FeO	MnO	MgO	NiO	CoO	CaO	Na2O	K2O	P2O5	H2O	CO2	SO3	Cl2O-1	F2O-1
	69.35	0.2	11.74	0.37	0	1.02	0.83	0.22	0	0	2.15	4.22	5.06	1.05	3.78	0	0	0	0
olivine	mass	=	0.1	(gm)	density	=	3.99	(gm/cc)	(analysis	in	mole	%)
	(Ca0.00Mg0.24Fe''0.64Mn0.13Co0.00Ni0.00)2SiO4
	G	=	-1028.51	(J)	H	=	-820.07	(J)	S	=	0.19	(J/K)	V	=	0.03	(cc)	Cp	=	0.1	(J/K)
	tephroite	fayalite	co-olivine	ni-olivine	monticellite	forsterite
	12.62	63.64	0	0	0.34	23.4
feldspar	mass	=	1.09	(gm)	density	=	2.56	(gm/cc)	(analysis	in	mole	%)
	K0.14Na0.73Ca0.13Al1.13Si2.87O8
	G	=	-17746.5	(J)	H	=	-15199.1	(J)	S	=	2.35	(J/K)	V	=	0.42	(cc)	Cp	=	1.31	(J/K)
	albite	anorthite	sanidine
	72.9	12.69	14.41
spinel	mass	=	0.01	(gm)	density	=	4.9	(gm/cc)	(analysis	in	mole	%)
	Fe''1.23Mg0.06Fe'''1.32Al0.08Cr0.00Ti0.30O4
	G	=	-68.7	(J)	H	=	-49.17	(J)	S	=	0.02	(J/K)	V	=	0	(cc)	Cp	=	0.01	(J/K)
	chromite	hercynite	magnetite	spinel	ulvospinel
	0	-2.38	65.99	6.45	29.94
apatite	mass	=	0.02	(gm)	density	=	3.06	(gm/cc)
	Ca5(PO4)3OH
	G	=	-238.32	(J)	H	=	-202.5	(J)	S	=	0.03	(J/K)	V	=	0.01	(cc)	Cp	=	0.02	(J/K)
water	mass	=	1.87	(gm)	density	=	0.23	(gm/cc)
	H2O
	G	=	-42233.4	(J)	H	=	-22852.4	(J)	S	=	17.89	(J/K)	V	=	8.23	(cc)	Cp	=	6.58	(J/K)
Total	solids	mass	=	3.08	(gm)	density	=	0.35	(gm/cc)
	G	=	-61315.5	(J)	H	=	-39123.3	(J)	S	=	20.49	(J/K)	V	=	8.68	(cc)	Cp	=	8.02	(J/K)
Summary	of	all	fractionated	phases:	(total	mass	=	74.25	grams)
olivine	mass	=	1.38	(gm)	density	=	3.76	(gm/cc)	(analysis	in	mole	%)
	(Ca0.00Mg0.46Fe''0.49Mn0.06Co0.00Ni0.00)2SiO4
	G	=	-16154.1	(J)	H	=	-13203.9	(J)	S	=	2.72	(J/K)	V	=	0.37	(cc)	Cp	=	1.46	(J/K)
	tephroite	fayalite	co-olivine	ni-olivine	monticellite	forsterite
	5.55	48.89	0	0	0.57	44.99
orthopyroxene	mass	=	1.93	(gm)	density	=	3.44	(gm/cc)	(analysis	in	mole	%)
	opx	Na0.00Ca0.05Fe''0.73Mg1.17Fe'''0.02Ti0.00Al0.09Si1.95O6
	G	=	-26894.4	(J)	H	=	-22688.7	(J)	S	=	3.88	(J/K)	V	=	0.56	(cc)	Cp	=	2.24	(J/K)
	diopside	clinoenstatit	hedenbergite	alumino-buffo	buffonite	essenite	jadeite
	-73.25	94.87	72.86	3.41	-3.2	5.15	0.16
clinopyroxene	mass	=	23.29	(gm)	density	=	3.34	(gm/cc)	(analysis	in	mole	%)
	cpx	Na0.02Ca0.88Fe''0.20Mg0.72Fe'''0.08Ti0.07Al0.28Si1.76O6
	G	=	-351381	(J)	H	=	-301436	(J)	S	=	46.11	(J/K)	V	=	6.98	(cc)	Cp	=	26.15	(J/K)
	diopside	clinoenstatit	hedenbergite	alumino-buffo	buffonite	essenite	jadeite
	43.45	10.65	20.46	16.29	-2.56	10.16	1.54
feldspar	mass	=	31.41	(gm)	density	=	2.64	(gm/cc)	(analysis	in	mole	%)
	K0.03Na0.48Ca0.49Al1.49Si2.51O8
	G	=	-517019	(J)	H	=	-444837	(J)	S	=	66.64	(J/K)	V	=	11.9	(cc)	Cp	=	37.57	(J/K)
	albite	anorthite	sanidine
	47.88	49.41	2.71
spinel	mass	=	15.12	(gm)	density	=	4.62	(gm/cc)	(analysis	in	mole	%)
	Fe''1.13Mg0.33Fe'''0.86Al0.20Cr0.00Ti0.47O4
	G	=	-126263	(J)	H	=	-95081.2	(J)	S	=	28.79	(J/K)	V	=	3.27	(cc)	Cp	=	13.9	(J/K)
	chromite	hercynite	magnetite	spinel	ulvospinel
	0	-23.3	43.02	33.44	46.85
apatite	mass	=	1.13	(gm)	density	=	3.06	(gm/cc)
	Ca5(PO4)3OH
	G	=	-16582.6	(J)	H	=	-14089.7	(J)	S	=	2.3	(J/K)	V	=	0.37	(cc)	Cp	=	1.26	(J/K)
Viscosity	of	the	System	cannot	be	computed.
System	mass	=	98.78	(gm)	density	=	2.37	(gm/cc)
	G	=	-1.46199e+06	(J)	H	=	-1.21791e+06	(J)	S	=	225.34	(J/K)	V	=	41.73	(cc)	Cp	=	119.61	(J/K)
Oxygen	delta	moles	=	0.0109483	delta	grams	=	0.350333
	G	=	-2641.09	(J)	H	=	280.4	(J)	S	=	2.7	(J/K)	V	=	985.97	(cc)	Cp	=	0.39	(J/K)
**********----------**********
Title:	Dummy	Title
T	=	800	(C)	P	=	1	(kbars)	log(10)	f	O2	=	-14.38	delta	HM	=	-5.64	NNO	=	-0.51	QFM	=	0	COH	=	1.62	IW	=	4.15
Constraint	Flags:	fO2	path	=	QFM	Fractionate	Solids
Liquid	mass	=	19.54	(gm)	density	=	2.23	(gm/cc)	viscosity	=	5.91	(log	10	poise)	(analysis	in	wt	%)
	G	=	-315280	(J)	H	=	-262444	(J)	S	=	49.24	(J/K)	V	=	8.75	(cc)	Cp	=	26.34	(J/K)
	SiO2	TiO2	Al2O3	Fe2O3	Cr2O3	FeO	MnO	MgO	NiO	CoO	CaO	Na2O	K2O	P2O5	H2O	CO2	SO3	Cl2O-1	F2O-1
	70.26	0.22	11.17	0.34	0	0.92	0.86	0.19	0	0	2.17	4.1	4.93	1.07	3.77	0	0	0	0
olivine	mass	=	0.1	(gm)	density	=	4.01	(gm/cc)	(analysis	in	mole	%)
	(Ca0.00Mg0.22Fe''0.64Mn0.14Co0.00Ni0.00)2SiO4
	G	=	-991.42	(J)	H	=	-791.29	(J)	S	=	0.19	(J/K)	V	=	0.02	(cc)	Cp	=	0.1	(J/K)
	tephroite	fayalite	co-olivine	ni-olivine	monticellite	forsterite
	13.8	64.38	0	0	0.34	21.49
feldspar	mass	=	1.27	(gm)	density	=	2.52	(gm/cc)	(analysis	in	mole	%)
	K0.50Na0.47Ca0.02Al1.02Si2.98O8
	G	=	-20271.6	(J)	H	=	-17374.9	(J)	S	=	2.7	(J/K)	V	=	0.5	(cc)	Cp	=	1.51	(J/K)
[truncated: 372 more rows]

## Sheet: PFC2a_Polybaric_stage1-FMQ-5MPa
**********----------**********
Title:	Dummy	Title
T	=	1300	(C)	P	=	5	(kbars)	log(10)	f	O2	=	-6.9	delta	HM	=	-5.22	NNO	=	-0.41	QFM	=	0	COH	=	2.09	IW	=	3.69
Constraint	Flags:	fO2	path	=	QFM	Fractionate	Solids
Liquid	mass	=	98.42	(gm)	density	=	2.59	(gm/cc)	viscosity	=	1.07	(log	10	poise)	(analysis	in	wt	%)
	G	=	-1.56863e+06	(J)	H	=	-1.1097e+06	(J)	S	=	291.73	(J/K)	V	=	37.93	(cc)	Cp	=	146.67	(J/K)
	SiO2	TiO2	Al2O3	Fe2O3	Cr2O3	FeO	MnO	MgO	NiO	CoO	CaO	Na2O	K2O	P2O5	H2O	CO2	SO3	Cl2O-1	F2O-1
	46.25	3.34	14.07	2.1	0	12.03	0.25	4.78	0	0	9.62	2.81	1.28	0.72	2.74	0	0	0	0
Total	solids	mass	=	0	(gm)	density	=	0	(gm/cc)
	G	=	0	(J)	H	=	0	(J)	S	=	0	(J/K)	V	=	0	(cc)	Cp	=	0	(J/K)
Summary	of	all	fractionated	phases:	(total	mass	=	0	grams)
Viscosity	of	the	System:	1.07	(log	10	poise)
System	mass	=	98.42	(gm)	density	=	2.59	(gm/cc)
	G	=	-1.56863e+06	(J)	H	=	-1.1097e+06	(J)	S	=	291.73	(J/K)	V	=	37.93	(cc)	Cp	=	146.67	(J/K)
Oxygen	delta	moles	=	6.93889e-17	delta	grams	=	2.22036e-15
	G	=	0	(J)	H	=	0	(J)	S	=	0	(J/K)	V	=	0	(cc)	Cp	=	0	(J/K)
**********----------**********
Title:	Dummy	Title
T	=	1290	(C)	P	=	5	(kbars)	log(10)	f	O2	=	-6.99	delta	HM	=	-5.22	NNO	=	-0.41	QFM	=	0	COH	=	2.08	IW	=	3.7
Constraint	Flags:	fO2	path	=	QFM	Fractionate	Solids
Liquid	mass	=	98.42	(gm)	density	=	2.6	(gm/cc)	viscosity	=	1.1	(log	10	poise)	(analysis	in	wt	%)
	G	=	-1.56573e+06	(J)	H	=	-1.11117e+06	(J)	S	=	290.8	(J/K)	V	=	37.88	(cc)	Cp	=	146.66	(J/K)
	SiO2	TiO2	Al2O3	Fe2O3	Cr2O3	FeO	MnO	MgO	NiO	CoO	CaO	Na2O	K2O	P2O5	H2O	CO2	SO3	Cl2O-1	F2O-1
	46.25	3.34	14.07	2.1	0	12.02	0.25	4.78	0	0	9.62	2.81	1.28	0.72	2.74	0	0	0	0
Total	solids	mass	=	0	(gm)	density	=	0	(gm/cc)
	G	=	0	(J)	H	=	0	(J)	S	=	0	(J/K)	V	=	0	(cc)	Cp	=	0	(J/K)
Summary	of	all	fractionated	phases:	(total	mass	=	0	grams)
Viscosity	of	the	System:	1.1	(log	10	poise)
System	mass	=	98.42	(gm)	density	=	2.6	(gm/cc)
	G	=	-1.56573e+06	(J)	H	=	-1.11117e+06	(J)	S	=	290.8	(J/K)	V	=	37.88	(cc)	Cp	=	146.66	(J/K)
Oxygen	delta	moles	=	1.93473e-05	delta	grams	=	0.000619089
	G	=	-7.02	(J)	H	=	0.83	(J)	S	=	0.01	(J/K)	V	=	2.51	(cc)	Cp	=	0	(J/K)
**********----------**********
Title:	Dummy	Title
T	=	1280	(C)	P	=	5	(kbars)	log(10)	f	O2	=	-7.09	delta	HM	=	-5.22	NNO	=	-0.4	QFM	=	0	COH	=	2.07	IW	=	3.71
Constraint	Flags:	fO2	path	=	QFM	Fractionate	Solids
Liquid	mass	=	98.42	(gm)	density	=	2.6	(gm/cc)	viscosity	=	1.14	(log	10	poise)	(analysis	in	wt	%)
	G	=	-1.56284e+06	(J)	H	=	-1.11265e+06	(J)	S	=	289.86	(J/K)	V	=	37.84	(cc)	Cp	=	146.64	(J/K)
	SiO2	TiO2	Al2O3	Fe2O3	Cr2O3	FeO	MnO	MgO	NiO	CoO	CaO	Na2O	K2O	P2O5	H2O	CO2	SO3	Cl2O-1	F2O-1
	46.25	3.34	14.07	2.11	0	12.02	0.25	4.78	0	0	9.62	2.81	1.28	0.72	2.74	0	0	0	0
Total	solids	mass	=	0	(gm)	density	=	0	(gm/cc)
	G	=	0	(J)	H	=	0	(J)	S	=	0	(J/K)	V	=	0	(cc)	Cp	=	0	(J/K)
Summary	of	all	fractionated	phases:	(total	mass	=	0	grams)
Viscosity	of	the	System:	1.14	(log	10	poise)
System	mass	=	98.42	(gm)	density	=	2.6	(gm/cc)
	G	=	-1.56284e+06	(J)	H	=	-1.11265e+06	(J)	S	=	289.86	(J/K)	V	=	37.84	(cc)	Cp	=	146.64	(J/K)
Oxygen	delta	moles	=	3.97714e-05	delta	grams	=	0.00127264
	G	=	-14.33	(J)	H	=	1.69	(J)	S	=	0.01	(J/K)	V	=	5.14	(cc)	Cp	=	0	(J/K)
**********----------**********
Title:	Dummy	Title
T	=	1270	(C)	P	=	5	(kbars)	log(10)	f	O2	=	-7.19	delta	HM	=	-5.22	NNO	=	-0.4	QFM	=	0	COH	=	2.06	IW	=	3.73
Constraint	Flags:	fO2	path	=	QFM	Fractionate	Solids
Liquid	mass	=	98.42	(gm)	density	=	2.6	(gm/cc)	viscosity	=	1.17	(log	10	poise)	(analysis	in	wt	%)
	G	=	-1.55996e+06	(J)	H	=	-1.11413e+06	(J)	S	=	288.91	(J/K)	V	=	37.79	(cc)	Cp	=	146.63	(J/K)
	SiO2	TiO2	Al2O3	Fe2O3	Cr2O3	FeO	MnO	MgO	NiO	CoO	CaO	Na2O	K2O	P2O5	H2O	CO2	SO3	Cl2O-1	F2O-1
	46.25	3.34	14.07	2.12	0	12.01	0.25	4.78	0	0	9.62	2.81	1.28	0.72	2.74	0	0	0	0
Total	solids	mass	=	0	(gm)	density	=	0	(gm/cc)
	G	=	0	(J)	H	=	0	(J)	S	=	0	(J/K)	V	=	0	(cc)	Cp	=	0	(J/K)
Summary	of	all	fractionated	phases:	(total	mass	=	0	grams)
Viscosity	of	the	System:	1.17	(log	10	poise)
System	mass	=	98.42	(gm)	density	=	2.6	(gm/cc)
	G	=	-1.55996e+06	(J)	H	=	-1.11413e+06	(J)	S	=	288.91	(J/K)	V	=	37.79	(cc)	Cp	=	146.63	(J/K)
Oxygen	delta	moles	=	6.13058e-05	delta	grams	=	0.00196171
	G	=	-21.93	(J)	H	=	2.58	(J)	S	=	0.02	(J/K)	V	=	7.87	(cc)	Cp	=	0	(J/K)
**********----------**********
Title:	Dummy	Title
T	=	1260	(C)	P	=	5	(kbars)	log(10)	f	O2	=	-7.29	delta	HM	=	-5.22	NNO	=	-0.39	QFM	=	0	COH	=	2.05	IW	=	3.74
Constraint	Flags:	fO2	path	=	QFM	Fractionate	Solids
Liquid	mass	=	98.42	(gm)	density	=	2.61	(gm/cc)	viscosity	=	1.2	(log	10	poise)	(analysis	in	wt	%)
	G	=	-1.55709e+06	(J)	H	=	-1.1156e+06	(J)	S	=	287.96	(J/K)	V	=	37.74	(cc)	Cp	=	146.61	(J/K)
	SiO2	TiO2	Al2O3	Fe2O3	Cr2O3	FeO	MnO	MgO	NiO	CoO	CaO	Na2O	K2O	P2O5	H2O	CO2	SO3	Cl2O-1	F2O-1
	46.25	3.34	14.07	2.12	0	12	0.25	4.78	0	0	9.62	2.81	1.28	0.72	2.74	0	0	0	0
Total	solids	mass	=	0	(gm)	density	=	0	(gm/cc)
	G	=	0	(J)	H	=	0	(J)	S	=	0	(J/K)	V	=	0	(cc)	Cp	=	0	(J/K)
Summary	of	all	fractionated	phases:	(total	mass	=	0	grams)
Viscosity	of	the	System:	1.2	(log	10	poise)
System	mass	=	98.42	(gm)	density	=	2.61	(gm/cc)
	G	=	-1.55709e+06	(J)	H	=	-1.1156e+06	(J)	S	=	287.96	(J/K)	V	=	37.74	(cc)	Cp	=	146.61	(J/K)
Oxygen	delta	moles	=	8.39852e-05	delta	grams	=	0.00268742
	G	=	-29.82	(J)	H	=	3.51	(J)	S	=	0.02	(J/K)	V	=	10.71	(cc)	Cp	=	0	(J/K)
**********----------**********
Title:	Dummy	Title
T	=	1250	(C)	P	=	5	(kbars)	log(10)	f	O2	=	-7.4	delta	HM	=	-5.22	NNO	=	-0.39	QFM	=	0	COH	=	2.04	IW	=	3.75
Constraint	Flags:	fO2	path	=	QFM	Fractionate	Solids
Liquid	mass	=	98.43	(gm)	density	=	2.61	(gm/cc)	viscosity	=	1.24	(log	10	poise)	(analysis	in	wt	%)
	G	=	-1.55423e+06	(J)	H	=	-1117080	(J)	S	=	287	(J/K)	V	=	37.69	(cc)	Cp	=	146.6	(J/K)
	SiO2	TiO2	Al2O3	Fe2O3	Cr2O3	FeO	MnO	MgO	NiO	CoO	CaO	Na2O	K2O	P2O5	H2O	CO2	SO3	Cl2O-1	F2O-1
	46.25	3.34	14.07	2.13	0	12	0.25	4.78	0	0	9.62	2.81	1.28	0.72	2.74	0	0	0	0
Total	solids	mass	=	0	(gm)	density	=	0	(gm/cc)
	G	=	0	(J)	H	=	0	(J)	S	=	0	(J/K)	V	=	0	(cc)	Cp	=	0	(J/K)
Summary	of	all	fractionated	phases:	(total	mass	=	0	grams)
Viscosity	of	the	System:	1.24	(log	10	poise)
System	mass	=	98.43	(gm)	density	=	2.61	(gm/cc)
	G	=	-1.55423e+06	(J)	H	=	-1117080	(J)	S	=	287	(J/K)	V	=	37.69	(cc)	Cp	=	146.6	(J/K)
Oxygen	delta	moles	=	0.000107846	delta	grams	=	0.00345094
	G	=	-38.01	(J)	H	=	4.47	(J)	S	=	0.03	(J/K)	V	=	13.66	(cc)	Cp	=	0	(J/K)
**********----------**********
Title:	Dummy	Title
T	=	1240	(C)	P	=	5	(kbars)	log(10)	f	O2	=	-7.5	delta	HM	=	-5.22	NNO	=	-0.38	QFM	=	0	COH	=	2.03	IW	=	3.76
Constraint	Flags:	fO2	path	=	QFM	Fractionate	Solids
Liquid	mass	=	98.43	(gm)	density	=	2.61	(gm/cc)	viscosity	=	1.27	(log	10	poise)	(analysis	in	wt	%)
	G	=	-1.55138e+06	(J)	H	=	-1.11856e+06	(J)	S	=	286.04	(J/K)	V	=	37.64	(cc)	Cp	=	146.58	(J/K)
	SiO2	TiO2	Al2O3	Fe2O3	Cr2O3	FeO	MnO	MgO	NiO	CoO	CaO	Na2O	K2O	P2O5	H2O	CO2	SO3	Cl2O-1	F2O-1
	46.25	3.34	14.07	2.14	0	11.99	0.25	4.78	0	0	9.62	2.81	1.28	0.72	2.74	0	0	0	0
Total	solids	mass	=	0	(gm)	density	=	0	(gm/cc)
	G	=	0	(J)	H	=	0	(J)	S	=	0	(J/K)	V	=	0	(cc)	Cp	=	0	(J/K)
Summary	of	all	fractionated	phases:	(total	mass	=	0	grams)
Viscosity	of	the	System:	1.27	(log	10	poise)
System	mass	=	98.43	(gm)	density	=	2.61	(gm/cc)
	G	=	-1.55138e+06	(J)	H	=	-1.11856e+06	(J)	S	=	286.04	(J/K)	V	=	37.64	(cc)	Cp	=	146.58	(J/K)
Oxygen	delta	moles	=	0.000132926	delta	grams	=	0.00425347
	G	=	-46.51	(J)	H	=	5.46	(J)	S	=	0.03	(J/K)	V	=	16.72	(cc)	Cp	=	0	(J/K)
**********----------**********
Title:	Dummy	Title
T	=	1230	(C)	P	=	5	(kbars)	log(10)	f	O2	=	-7.6	delta	HM	=	-5.22	NNO	=	-0.38	QFM	=	0	COH	=	2.02	IW	=	3.78
Constraint	Flags:	fO2	path	=	QFM	Fractionate	Solids
Liquid	mass	=	98.43	(gm)	density	=	2.62	(gm/cc)	viscosity	=	1.31	(log	10	poise)	(analysis	in	wt	%)
	G	=	-1.54854e+06	(J)	H	=	-1.12004e+06	(J)	S	=	285.07	(J/K)	V	=	37.59	(cc)	Cp	=	146.57	(J/K)
	SiO2	TiO2	Al2O3	Fe2O3	Cr2O3	FeO	MnO	MgO	NiO	CoO	CaO	Na2O	K2O	P2O5	H2O	CO2	SO3	Cl2O-1	F2O-1
	46.25	3.34	14.07	2.15	0	11.98	0.25	4.78	0	0	9.62	2.81	1.28	0.72	2.74	0	0	0	0
Total	solids	mass	=	0	(gm)	density	=	0	(gm/cc)
	G	=	0	(J)	H	=	0	(J)	S	=	0	(J/K)	V	=	0	(cc)	Cp	=	0	(J/K)
Summary	of	all	fractionated	phases:	(total	mass	=	0	grams)
Viscosity	of	the	System:	1.31	(log	10	poise)
System	mass	=	98.43	(gm)	density	=	2.62	(gm/cc)
	G	=	-1.54854e+06	(J)	H	=	-1.12004e+06	(J)	S	=	285.07	(J/K)	V	=	37.59	(cc)	Cp	=	146.57	(J/K)
Oxygen	delta	moles	=	0.000159265	delta	grams	=	0.00509628
	G	=	-55.31	(J)	H	=	6.48	(J)	S	=	0.04	(J/K)	V	=	19.9	(cc)	Cp	=	0.01	(J/K)
**********----------**********
Title:	Dummy	Title
T	=	1220	(C)	P	=	5	(kbars)	log(10)	f	O2	=	-7.71	delta	HM	=	-5.22	NNO	=	-0.37	QFM	=	0	COH	=	2.01	IW	=	3.79
Constraint	Flags:	fO2	path	=	QFM	Fractionate	Solids
Liquid	mass	=	98.43	(gm)	density	=	2.62	(gm/cc)	viscosity	=	1.34	(log	10	poise)	(analysis	in	wt	%)
	G	=	-1.54571e+06	(J)	H	=	-1.12151e+06	(J)	S	=	284.09	(J/K)	V	=	37.54	(cc)	Cp	=	146.55	(J/K)
	SiO2	TiO2	Al2O3	Fe2O3	Cr2O3	FeO	MnO	MgO	NiO	CoO	CaO	Na2O	K2O	P2O5	H2O	CO2	SO3	Cl2O-1	F2O-1
	46.25	3.34	14.07	2.16	0	11.97	0.25	4.78	0	0	9.62	2.81	1.28	0.72	2.74	0	0	0	0
Total	solids	mass	=	0	(gm)	density	=	0	(gm/cc)
	G	=	0	(J)	H	=	0	(J)	S	=	0	(J/K)	V	=	0	(cc)	Cp	=	0	(J/K)
Summary	of	all	fractionated	phases:	(total	mass	=	0	grams)
Viscosity	of	the	System:	1.34	(log	10	poise)
System	mass	=	98.43	(gm)	density	=	2.62	(gm/cc)
	G	=	-1.54571e+06	(J)	H	=	-1.12151e+06	(J)	S	=	284.09	(J/K)	V	=	37.54	(cc)	Cp	=	146.55	(J/K)
Oxygen	delta	moles	=	0.000186904	delta	grams	=	0.0059807
	G	=	-64.43	(J)	H	=	7.54	(J)	S	=	0.05	(J/K)	V	=	23.2	(cc)	Cp	=	0.01	(J/K)
**********----------**********
Title:	Dummy	Title
T	=	1210	(C)	P	=	5	(kbars)	log(10)	f	O2	=	-7.82	delta	HM	=	-5.22	NNO	=	-0.37	QFM	=	0	COH	=	2	IW	=	3.8
Constraint	Flags:	fO2	path	=	QFM	Fractionate	Solids
Liquid	mass	=	98.43	(gm)	density	=	2.63	(gm/cc)	viscosity	=	1.38	(log	10	poise)	(analysis	in	wt	%)
	G	=	-1.54289e+06	(J)	H	=	-1.12299e+06	(J)	S	=	283.11	(J/K)	V	=	37.5	(cc)	Cp	=	146.54	(J/K)
	SiO2	TiO2	Al2O3	Fe2O3	Cr2O3	FeO	MnO	MgO	NiO	CoO	CaO	Na2O	K2O	P2O5	H2O	CO2	SO3	Cl2O-1	F2O-1
	46.25	3.34	14.07	2.17	0	11.96	0.25	4.78	0	0	9.62	2.81	1.28	0.72	2.74	0	0	0	0
Total	solids	mass	=	0	(gm)	density	=	0	(gm/cc)
	G	=	0	(J)	H	=	0	(J)	S	=	0	(J/K)	V	=	0	(cc)	Cp	=	0	(J/K)
Summary	of	all	fractionated	phases:	(total	mass	=	0	grams)
Viscosity	of	the	System:	1.38	(log	10	poise)
System	mass	=	98.43	(gm)	density	=	2.63	(gm/cc)
	G	=	-1.54289e+06	(J)	H	=	-1.12299e+06	(J)	S	=	283.11	(J/K)	V	=	37.5	(cc)	Cp	=	146.54	(J/K)
Oxygen	delta	moles	=	0.000215887	delta	grams	=	0.00690811
	G	=	-73.86	(J)	H	=	8.63	(J)	S	=	0.06	(J/K)	V	=	26.62	(cc)	Cp	=	0.01	(J/K)
**********----------**********
Title:	Dummy	Title
T	=	1200	(C)	P	=	5	(kbars)	log(10)	f	O2	=	-7.93	delta	HM	=	-5.22	NNO	=	-0.37	QFM	=	0	COH	=	1.99	IW	=	3.82
Constraint	Flags:	fO2	path	=	QFM	Fractionate	Solids
Liquid	mass	=	98.43	(gm)	density	=	2.63	(gm/cc)	viscosity	=	1.41	(log	10	poise)	(analysis	in	wt	%)
	G	=	-1.54008e+06	(J)	H	=	-1.12445e+06	(J)	S	=	282.13	(J/K)	V	=	37.45	(cc)	Cp	=	143.41	(J/K)
	SiO2	TiO2	Al2O3	Fe2O3	Cr2O3	FeO	MnO	MgO	NiO	CoO	CaO	Na2O	K2O	P2O5	H2O	CO2	SO3	Cl2O-1	F2O-1
	46.25	3.34	14.07	2.18	0	11.95	0.25	4.77	0	0	9.62	2.81	1.28	0.72	2.74	0	0	0	0
Total	solids	mass	=	0	(gm)	density	=	0	(gm/cc)
	G	=	0	(J)	H	=	0	(J)	S	=	0	(J/K)	V	=	0	(cc)	Cp	=	0	(J/K)
Summary	of	all	fractionated	phases:	(total	mass	=	0	grams)
Viscosity	of	the	System:	1.41	(log	10	poise)
System	mass	=	98.43	(gm)	density	=	2.63	(gm/cc)
	G	=	-1.54008e+06	(J)	H	=	-1.12445e+06	(J)	S	=	282.13	(J/K)	V	=	37.45	(cc)	Cp	=	143.41	(J/K)
Oxygen	delta	moles	=	0.000246258	delta	grams	=	0.00787996
	G	=	-83.62	(J)	H	=	9.75	(J)	S	=	0.06	(J/K)	V	=	30.16	(cc)	Cp	=	0.01	(J/K)
**********----------**********
Title:	Dummy	Title
T	=	1190	(C)	P	=	5	(kbars)	log(10)	f	O2	=	-8.04	delta	HM	=	-5.22	NNO	=	-0.36	QFM	=	0	COH	=	1.98	IW	=	3.83
Constraint	Flags:	fO2	path	=	QFM	Fractionate	Solids
Liquid	mass	=	98.43	(gm)	density	=	2.63	(gm/cc)	viscosity	=	1.45	(log	10	poise)	(analysis	in	wt	%)
	G	=	-1.53728e+06	(J)	H	=	-1.1259e+06	(J)	S	=	281.16	(J/K)	V	=	37.4	(cc)	Cp	=	143.39	(J/K)
	SiO2	TiO2	Al2O3	Fe2O3	Cr2O3	FeO	MnO	MgO	NiO	CoO	CaO	Na2O	K2O	P2O5	H2O	CO2	SO3	Cl2O-1	F2O-1
	46.25	3.34	14.07	2.19	0	11.95	0.25	4.77	0	0	9.62	2.81	1.28	0.72	2.74	0	0	0	0
Total	solids	mass	=	0	(gm)	density	=	0	(gm/cc)
	G	=	0	(J)	H	=	0	(J)	S	=	0	(J/K)	V	=	0	(cc)	Cp	=	0	(J/K)
Summary	of	all	fractionated	phases:	(total	mass	=	0	grams)
Viscosity	of	the	System:	1.45	(log	10	poise)
System	mass	=	98.43	(gm)	density	=	2.63	(gm/cc)
	G	=	-1.53728e+06	(J)	H	=	-1.1259e+06	(J)	S	=	281.16	(J/K)	V	=	37.4	(cc)	Cp	=	143.39	(J/K)
Oxygen	delta	moles	=	0.000278066	delta	grams	=	0.00889777
	G	=	-93.7	(J)	H	=	10.91	(J)	S	=	0.07	(J/K)	V	=	33.83	(cc)	Cp	=	0.01	(J/K)
**********----------**********
Title:	Dummy	Title
T	=	1180	(C)	P	=	5	(kbars)	log(10)	f	O2	=	-8.15	delta	HM	=	-5.22	NNO	=	-0.36	QFM	=	0	COH	=	1.96	IW	=	3.84
Constraint	Flags:	fO2	path	=	QFM	Fractionate	Solids
Liquid	mass	=	98.43	(gm)	density	=	2.64	(gm/cc)	viscosity	=	1.49	(log	10	poise)	(analysis	in	wt	%)
	G	=	-1.53449e+06	(J)	H	=	-1.12735e+06	(J)	S	=	280.18	(J/K)	V	=	37.35	(cc)	Cp	=	143.37	(J/K)
	SiO2	TiO2	Al2O3	Fe2O3	Cr2O3	FeO	MnO	MgO	NiO	CoO	CaO	Na2O	K2O	P2O5	H2O	CO2	SO3	Cl2O-1	F2O-1
	46.25	3.34	14.07	2.2	0	11.94	0.25	4.77	0	0	9.62	2.81	1.28	0.72	2.74	0	0	0	0
Total	solids	mass	=	0	(gm)	density	=	0	(gm/cc)
	G	=	0	(J)	H	=	0	(J)	S	=	0	(J/K)	V	=	0	(cc)	Cp	=	0	(J/K)
Summary	of	all	fractionated	phases:	(total	mass	=	0	grams)
Viscosity	of	the	System:	1.49	(log	10	poise)
System	mass	=	98.43	(gm)	density	=	2.64	(gm/cc)
	G	=	-1.53449e+06	(J)	H	=	-1.12735e+06	(J)	S	=	280.18	(J/K)	V	=	37.35	(cc)	Cp	=	143.37	(J/K)
Oxygen	delta	moles	=	0.000311359	delta	grams	=	0.00996311
	G	=	-104.12	(J)	H	=	12.1	(J)	S	=	0.08	(J/K)	V	=	37.62	(cc)	Cp	=	0.01	(J/K)
**********----------**********
Title:	Dummy	Title
T	=	1170	(C)	P	=	5	(kbars)	log(10)	f	O2	=	-8.27	delta	HM	=	-5.22	NNO	=	-0.35	QFM	=	0	COH	=	1.95	IW	=	3.86
Constraint	Flags:	fO2	path	=	QFM	Fractionate	Solids
Liquid	mass	=	98.43	(gm)	density	=	2.64	(gm/cc)	viscosity	=	1.53	(log	10	poise)	(analysis	in	wt	%)
	G	=	-1.53171e+06	(J)	H	=	-1.1288e+06	(J)	S	=	279.19	(J/K)	V	=	37.3	(cc)	Cp	=	143.35	(J/K)
	SiO2	TiO2	Al2O3	Fe2O3	Cr2O3	FeO	MnO	MgO	NiO	CoO	CaO	Na2O	K2O	P2O5	H2O	CO2	SO3	Cl2O-1	F2O-1
	46.24	3.34	14.07	2.21	0	11.93	0.25	4.77	0	0	9.62	2.81	1.28	0.72	2.74	0	0	0	0
Total	solids	mass	=	0	(gm)	density	=	0	(gm/cc)
	G	=	0	(J)	H	=	0	(J)	S	=	0	(J/K)	V	=	0	(cc)	Cp	=	0	(J/K)
Summary	of	all	fractionated	phases:	(total	mass	=	0	grams)
Viscosity	of	the	System:	1.53	(log	10	poise)
System	mass	=	98.43	(gm)	density	=	2.64	(gm/cc)
	G	=	-1.53171e+06	(J)	H	=	-1.1288e+06	(J)	S	=	279.19	(J/K)	V	=	37.3	(cc)	Cp	=	143.35	(J/K)
Oxygen	delta	moles	=	0.00034619	delta	grams	=	0.0110776
	G	=	-114.88	(J)	H	=	13.33	(J)	S	=	0.09	(J/K)	V	=	41.54	(cc)	Cp	=	0.01	(J/K)
**********----------**********
Title:	Dummy	Title
T	=	1160	(C)	P	=	5	(kbars)	log(10)	f	O2	=	-8.38	delta	HM	=	-5.22	NNO	=	-0.35	QFM	=	0	COH	=	1.94	IW	=	3.87
Constraint	Flags:	fO2	path	=	QFM	Fractionate	Solids
Liquid	mass	=	98.43	(gm)	density	=	2.64	(gm/cc)	viscosity	=	1.56	(log	10	poise)	(analysis	in	wt	%)
	G	=	-1.52895e+06	(J)	H	=	-1.13025e+06	(J)	S	=	278.19	(J/K)	V	=	37.25	(cc)	Cp	=	143.33	(J/K)
	SiO2	TiO2	Al2O3	Fe2O3	Cr2O3	FeO	MnO	MgO	NiO	CoO	CaO	Na2O	K2O	P2O5	H2O	CO2	SO3	Cl2O-1	F2O-1
	46.24	3.34	14.07	2.22	0	11.91	0.25	4.77	0	0	9.62	2.81	1.28	0.72	2.74	0	0	0	0
Total	solids	mass	=	0	(gm)	density	=	0	(gm/cc)
	G	=	0	(J)	H	=	0	(J)	S	=	0	(J/K)	V	=	0	(cc)	Cp	=	0	(J/K)
Summary	of	all	fractionated	phases:	(total	mass	=	0	grams)
Viscosity	of	the	System:	1.56	(log	10	poise)
System	mass	=	98.43	(gm)	density	=	2.64	(gm/cc)
	G	=	-1.52895e+06	(J)	H	=	-1.13025e+06	(J)	S	=	278.19	(J/K)	V	=	37.25	(cc)	Cp	=	143.33	(J/K)
Oxygen	delta	moles	=	0.000382612	delta	grams	=	0.0122431
	G	=	-125.99	(J)	H	=	14.6	(J)	S	=	0.1	(J/K)	V	=	45.59	(cc)	Cp	=	0.01	(J/K)
**********----------**********
Title:	Dummy	Title
T	=	1150	(C)	P	=	5	(kbars)	log(10)	f	O2	=	-8.5	delta	HM	=	-5.22	NNO	=	-0.34	QFM	=	0	COH	=	1.93	IW	=	3.89
Constraint	Flags:	fO2	path	=	QFM	Fractionate	Solids
Liquid	mass	=	98.44	(gm)	density	=	2.65	(gm/cc)	viscosity	=	1.6	(log	10	poise)	(analysis	in	wt	%)
	G	=	-1.52619e+06	(J)	H	=	-1.1317e+06	(J)	S	=	277.19	(J/K)	V	=	37.21	(cc)	Cp	=	143.3	(J/K)
	SiO2	TiO2	Al2O3	Fe2O3	Cr2O3	FeO	MnO	MgO	NiO	CoO	CaO	Na2O	K2O	P2O5	H2O	CO2	SO3	Cl2O-1	F2O-1
	46.24	3.34	14.07	2.23	0	11.9	0.25	4.77	0	0	9.62	2.81	1.28	0.72	2.74	0	0	0	0
Total	solids	mass	=	0	(gm)	density	=	0	(gm/cc)
	G	=	0	(J)	H	=	0	(J)	S	=	0	(J/K)	V	=	0	(cc)	Cp	=	0	(J/K)
Summary	of	all	fractionated	phases:	(total	mass	=	0	grams)
Viscosity	of	the	System:	1.6	(log	10	poise)
System	mass	=	98.44	(gm)	density	=	2.65	(gm/cc)
	G	=	-1.52619e+06	(J)	H	=	-1.1317e+06	(J)	S	=	277.19	(J/K)	V	=	37.21	(cc)	Cp	=	143.3	(J/K)
Oxygen	delta	moles	=	0.000420683	delta	grams	=	0.0134613
	G	=	-137.45	(J)	H	=	15.89	(J)	S	=	0.11	(J/K)	V	=	49.78	(cc)	Cp	=	0.02	(J/K)
**********----------**********
Title:	Dummy	Title
T	=	1140	(C)	P	=	5	(kbars)	log(10)	f	O2	=	-8.62	delta	HM	=	-5.22	NNO	=	-0.34	QFM	=	0	COH	=	1.92	IW	=	3.9
Constraint	Flags:	fO2	path	=	QFM	Fractionate	Solids
Liquid	mass	=	98.44	(gm)	density	=	2.65	(gm/cc)	viscosity	=	1.64	(log	10	poise)	(analysis	in	wt	%)
	G	=	-1.52345e+06	(J)	H	=	-1.13316e+06	(J)	S	=	276.19	(J/K)	V	=	37.16	(cc)	Cp	=	143.28	(J/K)
	SiO2	TiO2	Al2O3	Fe2O3	Cr2O3	FeO	MnO	MgO	NiO	CoO	CaO	Na2O	K2O	P2O5	H2O	CO2	SO3	Cl2O-1	F2O-1
	46.24	3.34	14.07	2.25	0	11.89	0.25	4.77	0	0	9.62	2.81	1.28	0.72	2.74	0	0	0	0
Total	solids	mass	=	0	(gm)	density	=	0	(gm/cc)
	G	=	0	(J)	H	=	0	(J)	S	=	0	(J/K)	V	=	0	(cc)	Cp	=	0	(J/K)
Summary	of	all	fractionated	phases:	(total	mass	=	0	grams)
Viscosity	of	the	System:	1.64	(log	10	poise)
System	mass	=	98.44	(gm)	density	=	2.65	(gm/cc)
	G	=	-1.52345e+06	(J)	H	=	-1.13316e+06	(J)	S	=	276.19	(J/K)	V	=	37.16	(cc)	Cp	=	143.28	(J/K)
Oxygen	delta	moles	=	0.000460462	delta	grams	=	0.0147342
	G	=	-149.26	(J)	H	=	17.23	(J)	S	=	0.12	(J/K)	V	=	54.1	(cc)	Cp	=	0.02	(J/K)
**********----------**********
Title:	Dummy	Title
T	=	1130	(C)	P	=	5	(kbars)	log(10)	f	O2	=	-8.74	delta	HM	=	-5.22	NNO	=	-0.33	QFM	=	0	COH	=	1.9	IW	=	3.92
Constraint	Flags:	fO2	path	=	QFM	Fractionate	Solids
Liquid	mass	=	95.4	(gm)	density	=	2.64	(gm/cc)	viscosity	=	1.72	(log	10	poise)	(analysis	in	wt	%)
	G	=	-1.47829e+06	(J)	H	=	-1.10308e+06	(J)	S	=	267.41	(J/K)	V	=	36.16	(cc)	Cp	=	138.72	(J/K)
	SiO2	TiO2	Al2O3	Fe2O3	Cr2O3	FeO	MnO	MgO	NiO	CoO	CaO	Na2O	K2O	P2O5	H2O	CO2	SO3	Cl2O-1	F2O-1
	46.64	3.19	14.31	2.21	0	11.61	0.26	4.55	0	0	9.44	2.9	1.32	0.74	2.83	0	0	0	0
clinopyroxene	mass	=	2.23	(gm)	density	=	3.31	(gm/cc)	(analysis	in	mole	%)
	cpx	Na0.02Ca0.84Fe''0.19Mg0.74Fe'''0.08Ti0.09Al0.30Si1.73O6
	G	=	-34951	(J)	H	=	-27825.1	(J)	S	=	5.08	(J/K)	V	=	0.67	(cc)	Cp	=	2.59	(J/K)
	diopside	clinoenstatit	hedenbergite	alumino-buffo	buffonite	essenite	jadeite
	37.73	13.71	19.5	18.97	-1.12	9.17	2.04
spinel	mass	=	0.83	(gm)	density	=	4.5	(gm/cc)	(analysis	in	mole	%)
	Fe''1.14Mg0.41Fe'''0.68Al0.22Cr0.00Ti0.55O4
	G	=	-7758.51	(J)	H	=	-5243.7	(J)	S	=	1.79	(J/K)	V	=	0.18	(cc)	Cp	=	0.8	(J/K)
	chromite	hercynite	magnetite	spinel	ulvospinel
	0	-29.51	33.89	40.74	54.88
Total	solids	mass	=	3.06	(gm)	density	=	3.57	(gm/cc)
	G	=	-42709.5	(J)	H	=	-33068.8	(J)	S	=	6.87	(J/K)	V	=	0.86	(cc)	Cp	=	3.38	(J/K)
Summary	of	all	fractionated	phases:	(total	mass	=	0	grams)
Viscosity	of	the	System:	1.76	(log	10	poise)
System	mass	=	98.45	(gm)	density	=	2.66	(gm/cc)
	G	=	-1.521e+06	(J)	H	=	-1.13614e+06	(J)	S	=	274.28	(J/K)	V	=	37.02	(cc)	Cp	=	142.1	(J/K)
Oxygen	delta	moles	=	0.00102055	delta	grams	=	0.0326564
	G	=	-328.21	(J)	H	=	37.82	(J)	S	=	0.26	(J/K)	V	=	119.06	(cc)	Cp	=	0.04	(J/K)
**********----------**********
Title:	Dummy	Title
T	=	1120	(C)	P	=	5	(kbars)	log(10)	f	O2	=	-8.86	delta	HM	=	-5.22	NNO	=	-0.32	QFM	=	0	COH	=	1.89	IW	=	3.93
Constraint	Flags:	fO2	path	=	QFM	Fractionate	Solids
Liquid	mass	=	88.19	(gm)	density	=	2.6	(gm/cc)	viscosity	=	1.86	(log	10	poise)	(analysis	in	wt	%)
	G	=	-1.37716e+06	(J)	H	=	-1.03149e+06	(J)	S	=	248.12	(J/K)	V	=	33.9	(cc)	Cp	=	128.01	(J/K)
	SiO2	TiO2	Al2O3	Fe2O3	Cr2O3	FeO	MnO	MgO	NiO	CoO	CaO	Na2O	K2O	P2O5	H2O	CO2	SO3	Cl2O-1	F2O-1
	47.8	2.76	14.94	2.08	0	10.73	0.28	3.99	0	0	9	3.12	1.43	0.81	3.06	0	0	0	0
clinopyroxene	mass	=	5.06	(gm)	density	=	3.32	(gm/cc)	(analysis	in	mole	%)
	cpx	Na0.02Ca0.84Fe''0.20Mg0.73Fe'''0.08Ti0.09Al0.31Si1.73O6
	G	=	-79091	(J)	H	=	-63091.1	(J)	S	=	11.48	(J/K)	V	=	1.53	(cc)	Cp	=	5.86	(J/K)
	diopside	clinoenstatit	hedenbergite	alumino-buffo	buffonite	essenite	jadeite
	36.77	13.68	20.29	19.03	-1.35	9.47	2.1
spinel	mass	=	2.19	(gm)	density	=	4.53	(gm/cc)	(analysis	in	mole	%)
	Fe''1.16Mg0.38Fe'''0.70Al0.23Cr0.00Ti0.53O4
	G	=	-20236.6	(J)	H	=	-13665.1	(J)	S	=	4.72	(J/K)	V	=	0.48	(cc)	Cp	=	2.1	(J/K)
	chromite	hercynite	magnetite	spinel	ulvospinel
	0	-26.33	35.22	37.67	53.45
Total	solids	mass	=	7.26	(gm)	density	=	3.61	(gm/cc)
	G	=	-99327.6	(J)	H	=	-76756.2	(J)	S	=	16.2	(J/K)	V	=	2.01	(cc)	Cp	=	7.96	(J/K)
Summary	of	all	fractionated	phases:	(total	mass	=	3.05	grams)
clinopyroxene	mass	=	2.23	(gm)	density	=	3.32	(gm/cc)	(analysis	in	mole	%)
	cpx	Na0.02Ca0.84Fe''0.19Mg0.74Fe'''0.08Ti0.09Al0.30Si1.73O6
	G	=	-34865.1	(J)	H	=	-27822.9	(J)	S	=	5.05	(J/K)	V	=	0.67	(cc)	Cp	=	2.58	(J/K)
	diopside	clinoenstatit	hedenbergite	alumino-buffo	buffonite	essenite	jadeite
	37.73	13.71	19.5	18.97	-1.12	9.17	2.04
spinel	mass	=	0.83	(gm)	density	=	4.51	(gm/cc)	(analysis	in	mole	%)
	Fe''1.14Mg0.41Fe'''0.68Al0.22Cr0.00Ti0.55O4
	G	=	-7721.2	(J)	H	=	-5238.5	(J)	S	=	1.78	(J/K)	V	=	0.18	(cc)	Cp	=	0.8	(J/K)
	chromite	hercynite	magnetite	spinel	ulvospinel
	0	-29.51	33.89	40.74	54.88
Viscosity	of	the	System:	2.01	(log	10	poise)
System	mass	=	98.5	(gm)	density	=	2.68	(gm/cc)
	G	=	-1.51907e+06	(J)	H	=	-1.1413e+06	(J)	S	=	271.16	(J/K)	V	=	36.76	(cc)	Cp	=	139.35	(J/K)
Oxygen	delta	moles	=	0.00245288	delta	grams	=	0.0784892
	G	=	-782.59	(J)	H	=	90	(J)	S	=	0.63	(J/K)	V	=	284.12	(cc)	Cp	=	0.09	(J/K)
**********----------**********
Title:	Dummy	Title
T	=	1110	(C)	P	=	5	(kbars)	log(10)	f	O2	=	-8.98	delta	HM	=	-5.22	NNO	=	-0.32	QFM	=	0	COH	=	1.88	IW	=	3.95
Constraint	Flags:	fO2	path	=	QFM	Fractionate	Solids
Liquid	mass	=	82.76	(gm)	density	=	2.57	(gm/cc)	viscosity	=	1.99	(log	10	poise)	(analysis	in	wt	%)
	G	=	-1.3005e+06	(J)	H	=	-977615	(J)	S	=	233.44	(J/K)	V	=	32.18	(cc)	Cp	=	119.95	(J/K)
	SiO2	TiO2	Al2O3	Fe2O3	Cr2O3	FeO	MnO	MgO	NiO	CoO	CaO	Na2O	K2O	P2O5	H2O	CO2	SO3	Cl2O-1	F2O-1
	48.77	2.42	15.49	1.96	0	9.98	0.3	3.52	0	0	8.61	3.31	1.52	0.86	3.26	0	0	0	0
clinopyroxene	mass	=	3.88	(gm)	density	=	3.32	(gm/cc)	(analysis	in	mole	%)
	cpx	Na0.02Ca0.84Fe''0.21Mg0.72Fe'''0.08Ti0.09Al0.31Si1.73O6
	G	=	-60388.6	(J)	H	=	-48269.5	(J)	S	=	8.76	(J/K)	V	=	1.17	(cc)	Cp	=	4.48	(J/K)
	diopside	clinoenstatit	hedenbergite	alumino-buffo	buffonite	essenite	jadeite
	35.82	13.55	21.01	19.22	-1.55	9.78	2.18
spinel	mass	=	1.59	(gm)	density	=	4.55	(gm/cc)	(analysis	in	mole	%)
	Fe''1.17Mg0.35Fe'''0.73Al0.23Cr0.00Ti0.52O4
	G	=	-14451.6	(J)	H	=	-9754.64	(J)	S	=	3.4	(J/K)	V	=	0.35	(cc)	Cp	=	1.51	(J/K)
	chromite	hercynite	magnetite	spinel	ulvospinel
	0	-23.45	36.56	34.92	51.97
Total	solids	mass	=	5.47	(gm)	density	=	3.61	(gm/cc)
	G	=	-74840.2	(J)	H	=	-58024.1	(J)	S	=	12.16	(J/K)	V	=	1.52	(cc)	Cp	=	5.99	(J/K)
Summary	of	all	fractionated	phases:	(total	mass	=	10.31	grams)
clinopyroxene	mass	=	7.29	(gm)	density	=	3.32	(gm/cc)	(analysis	in	mole	%)
	cpx	Na0.02Ca0.84Fe''0.20Mg0.73Fe'''0.08Ti0.09Al0.30Si1.73O6
	G	=	-113756	(J)	H	=	-90970.3	(J)	S	=	16.47	(J/K)	V	=	2.2	(cc)	Cp	=	8.43	(J/K)
	diopside	clinoenstatit	hedenbergite	alumino-buffo	buffonite	essenite	jadeite
	37.06	13.69	20.05	19.02	-1.28	9.38	2.09
spinel	mass	=	3.02	(gm)	density	=	4.52	(gm/cc)	(analysis	in	mole	%)
	Fe''1.15Mg0.39Fe'''0.70Al0.23Cr0.00Ti0.54O4
	G	=	-27873.7	(J)	H	=	-18919.5	(J)	S	=	6.47	(J/K)	V	=	0.67	(cc)	Cp	=	2.89	(J/K)
	chromite	hercynite	magnetite	spinel	ulvospinel
	0	-27.21	34.85	38.51	53.84
Viscosity	of	the	System:	2.23	(log	10	poise)
System	mass	=	98.53	(gm)	density	=	2.7	(gm/cc)
	G	=	-1.51697e+06	(J)	H	=	-1.14553e+06	(J)	S	=	268.55	(J/K)	V	=	36.56	(cc)	Cp	=	137.26	(J/K)
Oxygen	delta	moles	=	0.0035299	delta	grams	=	0.112952
	G	=	-1117.2	(J)	H	=	128.24	(J)	S	=	0.9	(J/K)	V	=	405.94	(cc)	Cp	=	0.13	(J/K)
**********----------**********
Title:	Dummy	Title
T	=	1100	(C)	P	=	5	(kbars)	log(10)	f	O2	=	-9.11	delta	HM	=	-5.22	NNO	=	-0.31	QFM	=	0	COH	=	1.87	IW	=	3.96
Constraint	Flags:	fO2	path	=	QFM	Fractionate	Solids
Liquid	mass	=	78.5	(gm)	density	=	2.55	(gm/cc)	viscosity	=	2.11	(log	10	poise)	(analysis	in	wt	%)
	G	=	-1.23999e+06	(J)	H	=	-935419	(J)	S	=	221.8	(J/K)	V	=	30.82	(cc)	Cp	=	113.62	(J/K)
	SiO2	TiO2	Al2O3	Fe2O3	Cr2O3	FeO	MnO	MgO	NiO	CoO	CaO	Na2O	K2O	P2O5	H2O	CO2	SO3	Cl2O-1	F2O-1
	49.61	2.13	15.96	1.86	0	9.33	0.32	3.12	0	0	8.25	3.47	1.61	0.9	3.44	0	0	0	0
clinopyroxene	mass	=	3.09	(gm)	density	=	3.33	(gm/cc)	(analysis	in	mole	%)
	cpx	Na0.02Ca0.84Fe''0.22Mg0.70Fe'''0.08Ti0.09Al0.32Si1.72O6
	G	=	-47907.7	(J)	H	=	-38371.7	(J)	S	=	6.94	(J/K)	V	=	0.93	(cc)	Cp	=	3.56	(J/K)
	diopside	clinoenstatit	hedenbergite	alumino-buffo	buffonite	essenite	jadeite
	34.89	13.35	21.68	19.47	-1.75	10.08	2.27
spinel	mass	=	1.2	(gm)	density	=	4.57	(gm/cc)	(analysis	in	mole	%)
	Fe''1.18Mg0.32Fe'''0.76Al0.23Cr0.00Ti0.50O4
	G	=	-10806.1	(J)	H	=	-7293.43	(J)	S	=	2.56	(J/K)	V	=	0.26	(cc)	Cp	=	1.14	(J/K)
	chromite	hercynite	magnetite	spinel	ulvospinel
	0	-20.81	37.91	32.44	50.46
Total	solids	mass	=	4.29	(gm)	density	=	3.6	(gm/cc)
	G	=	-58713.8	(J)	H	=	-45665.1	(J)	S	=	9.5	(J/K)	V	=	1.19	(cc)	Cp	=	4.7	(J/K)
Summary	of	all	fractionated	phases:	(total	mass	=	15.77	grams)
clinopyroxene	mass	=	11.17	(gm)	density	=	3.32	(gm/cc)	(analysis	in	mole	%)
	cpx	Na0.02Ca0.84Fe''0.20Mg0.73Fe'''0.08Ti0.09Al0.31Si1.73O6
	G	=	-173858	(J)	H	=	-139341	(J)	S	=	25.14	(J/K)	V	=	3.36	(cc)	Cp	=	12.9	(J/K)
	diopside	clinoenstatit	hedenbergite	alumino-buffo	buffonite	essenite	jadeite
	36.63	13.64	20.38	19.09	-1.38	9.52	2.12
spinel	mass	=	4.6	(gm)	density	=	4.53	(gm/cc)	(analysis	in	mole	%)
	Fe''1.16Mg0.37Fe'''0.71Al0.23Cr0.00Ti0.53O4
	G	=	-42207.8	(J)	H	=	-28705.1	(J)	S	=	9.83	(J/K)	V	=	1.01	(cc)	Cp	=	4.4	(J/K)
	chromite	hercynite	magnetite	spinel	ulvospinel
	0	-25.92	35.44	37.28	53.2
Viscosity	of	the	System:	2.42	(log	10	poise)
System	mass	=	98.56	(gm)	density	=	2.71	(gm/cc)
	G	=	-1.51477e+06	(J)	H	=	-1.14913e+06	(J)	S	=	266.28	(J/K)	V	=	36.39	(cc)	Cp	=	135.61	(J/K)
Oxygen	delta	moles	=	0.0043776	delta	grams	=	0.140078
	G	=	-1374.33	(J)	H	=	157.46	(J)	S	=	1.12	(J/K)	V	=	499.78	(cc)	Cp	=	0.16	(J/K)
**********----------**********
Title:	Dummy	Title
T	=	1090	(C)	P	=	5	(kbars)	log(10)	f	O2	=	-9.24	delta	HM	=	-5.22	NNO	=	-0.31	QFM	=	0	COH	=	1.85	IW	=	3.98
Constraint	Flags:	fO2	path	=	QFM	Fractionate	Solids
Liquid	mass	=	75.06	(gm)	density	=	2.53	(gm/cc)	viscosity	=	2.22	(log	10	poise)	(analysis	in	wt	%)
	G	=	-1.19069e+06	(J)	H	=	-901334	(J)	S	=	212.27	(J/K)	V	=	29.71	(cc)	Cp	=	108.5	(J/K)
	SiO2	TiO2	Al2O3	Fe2O3	Cr2O3	FeO	MnO	MgO	NiO	CoO	CaO	Na2O	K2O	P2O5	H2O	CO2	SO3	Cl2O-1	F2O-1
	50.35	1.89	16.37	1.76	0	8.74	0.33	2.78	0	0	7.92	3.62	1.68	0.95	3.6	0	0	0	0
clinopyroxene	mass	=	2.53	(gm)	density	=	3.33	(gm/cc)	(analysis	in	mole	%)
	cpx	Na0.02Ca0.85Fe''0.22Mg0.69Fe'''0.08Ti0.09Al0.33Si1.72O6
	G	=	-39139.4	(J)	H	=	-31413.3	(J)	S	=	5.67	(J/K)	V	=	0.76	(cc)	Cp	=	2.91	(J/K)
	diopside	clinoenstatit	hedenbergite	alumino-buffo	buffonite	essenite	jadeite
	33.99	13.11	22.32	19.75	-1.93	10.39	2.37
spinel	mass	=	0.94	(gm)	density	=	4.59	(gm/cc)	(analysis	in	mole	%)
	Fe''1.19Mg0.30Fe'''0.79Al0.24Cr0.00Ti0.49O4
	G	=	-8383.98	(J)	H	=	-5659.79	(J)	S	=	2	(J/K)	V	=	0.21	(cc)	Cp	=	0.89	(J/K)
	chromite	hercynite	magnetite	spinel	ulvospinel
	0	-18.36	39.29	30.16	48.91
Total	solids	mass	=	3.47	(gm)	density	=	3.6	(gm/cc)
	G	=	-47523.4	(J)	H	=	-37073.1	(J)	S	=	7.67	(J/K)	V	=	0.96	(cc)	Cp	=	3.8	(J/K)
Summary	of	all	fractionated	phases:	(total	mass	=	20.05	grams)
clinopyroxene	mass	=	14.25	(gm)	density	=	3.33	(gm/cc)	(analysis	in	mole	%)
	cpx	Na0.02Ca0.84Fe''0.21Mg0.72Fe'''0.08Ti0.09Al0.31Si1.73O6
	G	=	-221410	(J)	H	=	-177849	(J)	S	=	31.96	(J/K)	V	=	4.29	(cc)	Cp	=	16.44	(J/K)
	diopside	clinoenstatit	hedenbergite	alumino-buffo	buffonite	essenite	jadeite
	36.26	13.58	20.66	19.17	-1.46	9.64	2.15
spinel	mass	=	5.8	(gm)	density	=	4.54	(gm/cc)	(analysis	in	mole	%)
	Fe''1.16Mg0.36Fe'''0.72Al0.23Cr0.00Ti0.53O4
	G	=	-52871.5	(J)	H	=	-36040.9	(J)	S	=	12.35	(J/K)	V	=	1.28	(cc)	Cp	=	5.53	(J/K)
	chromite	hercynite	magnetite	spinel	ulvospinel
	0	-24.87	35.95	36.29	52.64
Viscosity	of	the	System:	2.6	(log	10	poise)
System	mass	=	98.58	(gm)	density	=	2.72	(gm/cc)
	G	=	-1.5125e+06	(J)	H	=	-1.1523e+06	(J)	S	=	264.24	(J/K)	V	=	36.24	(cc)	Cp	=	134.27	(J/K)
Oxygen	delta	moles	=	0.0050694	delta	grams	=	0.162215
	G	=	-1578.61	(J)	H	=	180.51	(J)	S	=	1.29	(J/K)	V	=	574.55	(cc)	Cp	=	0.18	(J/K)
**********----------**********
Title:	Dummy	Title
T	=	1080	(C)	P	=	5	(kbars)	log(10)	f	O2	=	-9.37	delta	HM	=	-5.22	NNO	=	-0.3	QFM	=	0	COH	=	1.84	IW	=	3.99
Constraint	Flags:	fO2	path	=	QFM	Fractionate	Solids
Liquid	mass	=	71.95	(gm)	density	=	2.51	(gm/cc)	viscosity	=	2.33	(log	10	poise)	(analysis	in	wt	%)
	G	=	-1.14593e+06	(J)	H	=	-870349	(J)	S	=	203.66	(J/K)	V	=	28.7	(cc)	Cp	=	103.82	(J/K)
	SiO2	TiO2	Al2O3	Fe2O3	Cr2O3	FeO	MnO	MgO	NiO	CoO	CaO	Na2O	K2O	P2O5	H2O	CO2	SO3	Cl2O-1	F2O-1
	51.15	1.69	16.79	1.67	0	8.23	0.35	2.47	0	0	7.5	3.77	1.75	0.89	3.75	0	0	0	0
clinopyroxene	mass	=	2.17	(gm)	density	=	3.34	(gm/cc)	(analysis	in	mole	%)
	cpx	Na0.02Ca0.85Fe''0.23Mg0.68Fe'''0.09Ti0.09Al0.33Si1.72O6
	G	=	-33487.1	(J)	H	=	-26932.2	(J)	S	=	4.84	(J/K)	V	=	0.65	(cc)	Cp	=	2.49	(J/K)
	diopside	clinoenstatit	hedenbergite	alumino-buffo	buffonite	essenite	jadeite
	33.14	12.94	22.97	19.93	-2.15	10.69	2.47
spinel	mass	=	0.79	(gm)	density	=	4.61	(gm/cc)	(analysis	in	mole	%)
	Fe''1.19Mg0.28Fe'''0.81Al0.24Cr0.00Ti0.47O4
	G	=	-6937.87	(J)	H	=	-4686.1	(J)	S	=	1.66	(J/K)	V	=	0.17	(cc)	Cp	=	0.74	(J/K)
	chromite	hercynite	magnetite	spinel	ulvospinel
	0	-16.14	40.64	28.12	47.38
apatite	mass	=	0.17	(gm)	density	=	3.06	(gm/cc)
	Ca5(PO4)3OH
	G	=	-2600.93	(J)	H	=	-2068.3	(J)	S	=	0.39	(J/K)	V	=	0.06	(cc)	Cp	=	0.2	(J/K)
Total	solids	mass	=	3.13	(gm)	density	=	3.57	(gm/cc)
	G	=	-43025.9	(J)	H	=	-33686.6	(J)	S	=	6.9	(J/K)	V	=	0.88	(cc)	Cp	=	3.43	(J/K)
Summary	of	all	fractionated	phases:	(total	mass	=	23.52	grams)
clinopyroxene	mass	=	16.78	(gm)	density	=	3.33	(gm/cc)	(analysis	in	mole	%)
	cpx	Na0.02Ca0.84Fe''0.21Mg0.72Fe'''0.08Ti0.09Al0.31Si1.73O6
	G	=	-260140	(J)	H	=	-209427	(J)	S	=	37.48	(J/K)	V	=	5.04	(cc)	Cp	=	19.33	(J/K)
	diopside	clinoenstatit	hedenbergite	alumino-buffo	buffonite	essenite	jadeite
	35.92	13.51	20.91	19.26	-1.53	9.75	2.18
spinel	mass	=	6.74	(gm)	density	=	4.55	(gm/cc)	(analysis	in	mole	%)
	Fe''1.17Mg0.35Fe'''0.73Al0.23Cr0.00Ti0.52O4
	G	=	-61093.7	(J)	H	=	-41751.8	(J)	S	=	14.29	(J/K)	V	=	1.48	(cc)	Cp	=	6.41	(J/K)
	chromite	hercynite	magnetite	spinel	ulvospinel
	0	-23.97	36.41	35.44	52.12
Viscosity	of	the	System:	2.79	(log	10	poise)
System	mass	=	98.6	(gm)	density	=	2.73	(gm/cc)
	G	=	-1.51019e+06	(J)	H	=	-1.15521e+06	(J)	S	=	262.33	(J/K)	V	=	36.1	(cc)	Cp	=	132.99	(J/K)
Oxygen	delta	moles	=	0.00565424	delta	grams	=	0.180929
	G	=	-1746.35	(J)	H	=	199.29	(J)	S	=	1.44	(J/K)	V	=	636.13	(cc)	Cp	=	0.2	(J/K)
**********----------**********
Title:	Dummy	Title
T	=	1070	(C)	P	=	5	(kbars)	log(10)	f	O2	=	-9.5	delta	HM	=	-5.22	NNO	=	-0.3	QFM	=	0	COH	=	1.83	IW	=	4.01
Constraint	Flags:	fO2	path	=	QFM	Fractionate	Solids
Liquid	mass	=	69.36	(gm)	density	=	2.49	(gm/cc)	viscosity	=	2.44	(log	10	poise)	(analysis	in	wt	%)
	G	=	-1.10857e+06	(J)	H	=	-844750	(J)	S	=	196.42	(J/K)	V	=	27.86	(cc)	Cp	=	99.94	(J/K)
	SiO2	TiO2	Al2O3	Fe2O3	Cr2O3	FeO	MnO	MgO	NiO	CoO	CaO	Na2O	K2O	P2O5	H2O	CO2	SO3	Cl2O-1	F2O-1
	51.86	1.51	17.16	1.59	0	7.75	0.36	2.2	0	0	7.12	3.9	1.82	0.84	3.88	0	0	0	0
clinopyroxene	mass	=	1.83	(gm)	density	=	3.34	(gm/cc)	(analysis	in	mole	%)
	cpx	Na0.03Ca0.85Fe''0.24Mg0.67Fe'''0.09Ti0.09Al0.34Si1.71O6
	G	=	-28125.6	(J)	H	=	-22667	(J)	S	=	4.06	(J/K)	V	=	0.55	(cc)	Cp	=	2.1	(J/K)
	diopside	clinoenstatit	hedenbergite	alumino-buffo	buffonite	essenite	jadeite
	32.3	12.71	23.6	20.15	-2.35	11	2.58
spinel	mass	=	0.64	(gm)	density	=	4.63	(gm/cc)	(analysis	in	mole	%)
	Fe''1.20Mg0.26Fe'''0.84Al0.24Cr0.00Ti0.46O4
	G	=	-5600.99	(J)	H	=	-3785.82	(J)	S	=	1.35	(J/K)	V	=	0.14	(cc)	Cp	=	0.6	(J/K)
	chromite	hercynite	magnetite	spinel	ulvospinel
	0	-14.03	42.02	26.21	45.8
apatite	mass	=	0.13	(gm)	density	=	3.06	(gm/cc)
	Ca5(PO4)3OH
	G	=	-2010.04	(J)	H	=	-1602.38	(J)	S	=	0.3	(J/K)	V	=	0.04	(cc)	Cp	=	0.15	(J/K)
Total	solids	mass	=	2.61	(gm)	density	=	3.57	(gm/cc)
	G	=	-35736.6	(J)	H	=	-28055.2	(J)	S	=	5.72	(J/K)	V	=	0.73	(cc)	Cp	=	2.85	(J/K)
Summary	of	all	fractionated	phases:	(total	mass	=	26.65	grams)
clinopyroxene	mass	=	18.95	(gm)	density	=	3.33	(gm/cc)	(analysis	in	mole	%)
	cpx	Na0.02Ca0.84Fe''0.21Mg0.71Fe'''0.08Ti0.09Al0.31Si1.72O6
	G	=	-293170	(J)	H	=	-236550	(J)	S	=	42.15	(J/K)	V	=	5.69	(cc)	Cp	=	21.8	(J/K)
	diopside	clinoenstatit	hedenbergite	alumino-buffo	buffonite	essenite	jadeite
	35.6	13.44	21.15	19.33	-1.6	9.86	2.22
spinel	mass	=	7.53	(gm)	density	=	4.56	(gm/cc)	(analysis	in	mole	%)
	Fe''1.17Mg0.35Fe'''0.74Al0.23Cr0.00Ti0.52O4
	G	=	-67854	(J)	H	=	-46496.5	(J)	S	=	15.9	(J/K)	V	=	1.65	(cc)	Cp	=	7.15	(J/K)
	chromite	hercynite	magnetite	spinel	ulvospinel
	0	-23.16	36.85	34.68	51.63
apatite	mass	=	0.17	(gm)	density	=	3.06	(gm/cc)
	Ca5(PO4)3OH
	G	=	-2520.87	(J)	H	=	-2009.6	(J)	S	=	0.38	(J/K)	V	=	0.05	(cc)	Cp	=	0.19	(J/K)
Viscosity	of	the	System:	2.97	(log	10	poise)
System	mass	=	98.62	(gm)	density	=	2.74	(gm/cc)
	G	=	-1.50785e+06	(J)	H	=	-1.15786e+06	(J)	S	=	260.57	(J/K)	V	=	35.98	(cc)	Cp	=	131.93	(J/K)
Oxygen	delta	moles	=	0.00615162	delta	grams	=	0.196845
	G	=	-1884.33	(J)	H	=	214.59	(J)	S	=	1.56	(J/K)	V	=	686.97	(cc)	Cp	=	0.22	(J/K)
**********----------**********
Title:	Dummy	Title
T	=	1060	(C)	P	=	5	(kbars)	log(10)	f	O2	=	-9.63	delta	HM	=	-5.22	NNO	=	-0.29	QFM	=	0	COH	=	1.81	IW	=	4.03
Constraint	Flags:	fO2	path	=	QFM	Fractionate	Solids
Liquid	mass	=	67.16	(gm)	density	=	2.48	(gm/cc)	viscosity	=	2.55	(log	10	poise)	(analysis	in	wt	%)
	G	=	-1.07656e+06	(J)	H	=	-823036	(J)	S	=	190.17	(J/K)	V	=	27.13	(cc)	Cp	=	96.63	(J/K)
	SiO2	TiO2	Al2O3	Fe2O3	Cr2O3	FeO	MnO	MgO	NiO	CoO	CaO	Na2O	K2O	P2O5	H2O	CO2	SO3	Cl2O-1	F2O-1
	52.5	1.35	17.5	1.52	0	7.32	0.37	1.97	0	0	6.77	4.02	1.88	0.8	4.01	0	0	0	0
clinopyroxene	mass	=	1.57	(gm)	density	=	3.35	(gm/cc)	(analysis	in	mole	%)
	cpx	Na0.03Ca0.85Fe''0.24Mg0.65Fe'''0.09Ti0.09Al0.34Si1.71O6
	G	=	-24078.7	(J)	H	=	-19445.8	(J)	S	=	3.48	(J/K)	V	=	0.47	(cc)	Cp	=	1.8	(J/K)
	diopside	clinoenstatit	hedenbergite	alumino-buffo	buffonite	essenite	jadeite
	31.48	12.45	24.21	20.39	-2.55	11.32	2.7
spinel	mass	=	0.54	(gm)	density	=	4.64	(gm/cc)	(analysis	in	mole	%)
	Fe''1.20Mg0.24Fe'''0.87Al0.25Cr0.00Ti0.44O4
	G	=	-4640.41	(J)	H	=	-3139.31	(J)	S	=	1.13	(J/K)	V	=	0.12	(cc)	Cp	=	0.5	(J/K)
	chromite	hercynite	magnetite	spinel	ulvospinel
	0	-12.04	43.42	24.42	44.2
apatite	mass	=	0.11	(gm)	density	=	3.06	(gm/cc)
	Ca5(PO4)3OH
	G	=	-1694.02	(J)	H	=	-1353.78	(J)	S	=	0.26	(J/K)	V	=	0.04	(cc)	Cp	=	0.13	(J/K)
Total	solids	mass	=	2.22	(gm)	density	=	3.57	(gm/cc)
	G	=	-30413.1	(J)	H	=	-23938.9	(J)	S	=	4.86	(J/K)	V	=	0.62	(cc)	Cp	=	2.43	(J/K)
Summary	of	all	fractionated	phases:	(total	mass	=	29.25	grams)
clinopyroxene	mass	=	20.78	(gm)	density	=	3.33	(gm/cc)	(analysis	in	mole	%)
	cpx	Na0.02Ca0.84Fe''0.21Mg0.71Fe'''0.08Ti0.09Al0.32Si1.72O6
	G	=	-320800	(J)	H	=	-259427	(J)	S	=	46.04	(J/K)	V	=	6.23	(cc)	Cp	=	23.87	(J/K)
	diopside	clinoenstatit	hedenbergite	alumino-buffo	buffonite	essenite	jadeite
	35.31	13.38	21.36	19.41	-1.66	9.96	2.25
spinel	mass	=	8.17	(gm)	density	=	4.57	(gm/cc)	(analysis	in	mole	%)
	Fe''1.17Mg0.34Fe'''0.74Al0.23Cr0.00Ti0.51O4
	G	=	-73264.7	(J)	H	=	-50346.8	(J)	S	=	17.19	(J/K)	V	=	1.79	(cc)	Cp	=	7.74	(J/K)
	chromite	hercynite	magnetite	spinel	ulvospinel
	0	-22.45	37.25	34.02	51.18
apatite	mass	=	0.29	(gm)	density	=	3.06	(gm/cc)
	Ca5(PO4)3OH
	G	=	-4448.08	(J)	H	=	-3554.7	(J)	S	=	0.67	(J/K)	V	=	0.1	(cc)	Cp	=	0.34	(J/K)
Viscosity	of	the	System:	3.13	(log	10	poise)
System	mass	=	98.63	(gm)	density	=	2.75	(gm/cc)
	G	=	-1.50549e+06	(J)	H	=	-1.1603e+06	(J)	S	=	258.92	(J/K)	V	=	35.87	(cc)	Cp	=	131.01	(J/K)
Oxygen	delta	moles	=	0.00658416	delta	grams	=	0.210685
	G	=	-2000.1	(J)	H	=	227.31	(J)	S	=	1.67	(J/K)	V	=	729.8	(cc)	Cp	=	0.24	(J/K)
**********----------**********
Title:	Dummy	Title
T	=	1050	(C)	P	=	5	(kbars)	log(10)	f	O2	=	-9.77	delta	HM	=	-5.22	NNO	=	-0.29	QFM	=	0	COH	=	1.8	IW	=	4.04
Constraint	Flags:	fO2	path	=	QFM	Fractionate	Solids
Liquid	mass	=	65.26	(gm)	density	=	2.46	(gm/cc)	viscosity	=	2.65	(log	10	poise)	(analysis	in	wt	%)
	G	=	-1.04876e+06	(J)	H	=	-804365	(J)	S	=	184.71	(J/K)	V	=	26.5	(cc)	Cp	=	93.77	(J/K)
	SiO2	TiO2	Al2O3	Fe2O3	Cr2O3	FeO	MnO	MgO	NiO	CoO	CaO	Na2O	K2O	P2O5	H2O	CO2	SO3	Cl2O-1	F2O-1
	53.08	1.21	17.8	1.45	0	6.92	0.38	1.76	0	0	6.45	4.13	1.93	0.77	4.12	0	0	0	0
clinopyroxene	mass	=	1.37	(gm)	density	=	3.35	(gm/cc)	(analysis	in	mole	%)
	cpx	Na0.03Ca0.85Fe''0.25Mg0.64Fe'''0.09Ti0.09Al0.35Si1.70O6
	G	=	-20884.3	(J)	H	=	-16901	(J)	S	=	3.01	(J/K)	V	=	0.41	(cc)	Cp	=	1.56	(J/K)
	diopside	clinoenstatit	hedenbergite	alumino-buffo	buffonite	essenite	jadeite
	30.65	12.16	24.83	20.63	-2.75	11.65	2.83
spinel	mass	=	0.46	(gm)	density	=	4.66	(gm/cc)	(analysis	in	mole	%)
	Fe''1.20Mg0.23Fe'''0.90Al0.25Cr0.00Ti0.43O4
	G	=	-3914.71	(J)	H	=	-2651.12	(J)	S	=	0.95	(J/K)	V	=	0.1	(cc)	Cp	=	0.43	(J/K)
	chromite	hercynite	magnetite	spinel	ulvospinel
	0	-10.16	44.85	22.75	42.56
apatite	mass	=	0.1	(gm)	density	=	3.06	(gm/cc)
	Ca5(PO4)3OH
	G	=	-1449.56	(J)	H	=	-1161.28	(J)	S	=	0.22	(J/K)	V	=	0.03	(cc)	Cp	=	0.11	(J/K)
Total	solids	mass	=	1.92	(gm)	density	=	3.58	(gm/cc)
	G	=	-26248.6	(J)	H	=	-20713.5	(J)	S	=	4.18	(J/K)	V	=	0.54	(cc)	Cp	=	2.1	(J/K)
Summary	of	all	fractionated	phases:	(total	mass	=	31.46	grams)
clinopyroxene	mass	=	22.35	(gm)	density	=	3.34	(gm/cc)	(analysis	in	mole	%)
	cpx	Na0.02Ca0.84Fe''0.22Mg0.71Fe'''0.08Ti0.09Al0.32Si1.72O6
	G	=	-344350	(J)	H	=	-279102	(J)	S	=	49.31	(J/K)	V	=	6.7	(cc)	Cp	=	25.64	(J/K)
	diopside	clinoenstatit	hedenbergite	alumino-buffo	buffonite	essenite	jadeite
	35.04	13.31	21.56	19.47	-1.73	10.05	2.28
spinel	mass	=	8.71	(gm)	density	=	4.57	(gm/cc)	(analysis	in	mole	%)
	Fe''1.17Mg0.33Fe'''0.75Al0.23Cr0.00Ti0.51O4
	G	=	-77704.4	(J)	H	=	-53555.6	(J)	S	=	18.25	(J/K)	V	=	1.9	(cc)	Cp	=	8.24	(J/K)
	chromite	hercynite	magnetite	spinel	ulvospinel
	0	-21.82	37.62	33.44	50.75
apatite	mass	=	0.4	(gm)	density	=	3.06	(gm/cc)
	Ca5(PO4)3OH
	G	=	-6056.96	(J)	H	=	-4852.38	(J)	S	=	0.91	(J/K)	V	=	0.13	(cc)	Cp	=	0.46	(J/K)
Viscosity	of	the	System:	3.29	(log	10	poise)
System	mass	=	98.64	(gm)	density	=	2.76	(gm/cc)
	G	=	-1.50312e+06	(J)	H	=	-1.16259e+06	(J)	S	=	257.36	(J/K)	V	=	35.77	(cc)	Cp	=	130.21	(J/K)
Oxygen	delta	moles	=	0.00696667	delta	grams	=	0.222925
	G	=	-2098.63	(J)	H	=	238	(J)	S	=	1.77	(J/K)	V	=	766.41	(cc)	Cp	=	0.25	(J/K)
**********----------**********
Title:	Dummy	Title
T	=	1040	(C)	P	=	5	(kbars)	log(10)	f	O2	=	-9.9	delta	HM	=	-5.22	NNO	=	-0.28	QFM	=	0	COH	=	1.78	IW	=	4.06
Constraint	Flags:	fO2	path	=	QFM	Fractionate	Solids
Liquid	mass	=	63.6	(gm)	density	=	2.45	(gm/cc)	viscosity	=	2.75	(log	10	poise)	(analysis	in	wt	%)
	G	=	-1.02432e+06	(J)	H	=	-788132	(J)	S	=	179.86	(J/K)	V	=	25.95	(cc)	Cp	=	91.26	(J/K)
	SiO2	TiO2	Al2O3	Fe2O3	Cr2O3	FeO	MnO	MgO	NiO	CoO	CaO	Na2O	K2O	P2O5	H2O	CO2	SO3	Cl2O-1	F2O-1
	53.62	1.09	18.07	1.38	0	6.54	0.39	1.57	0	0	6.16	4.23	1.98	0.73	4.23	0	0	0	0
clinopyroxene	mass	=	1.2	(gm)	density	=	3.36	(gm/cc)	(analysis	in	mole	%)
	cpx	Na0.03Ca0.85Fe''0.25Mg0.62Fe'''0.09Ti0.09Al0.36Si1.70O6
	G	=	-18306.8	(J)	H	=	-14845.8	(J)	S	=	2.64	(J/K)	V	=	0.36	(cc)	Cp	=	1.37	(J/K)
	diopside	clinoenstatit	hedenbergite	alumino-buffo	buffonite	essenite	jadeite
	29.84	11.85	25.45	20.86	-2.96	12	2.97
spinel	mass	=	0.4	(gm)	density	=	4.68	(gm/cc)	(analysis	in	mole	%)
	Fe''1.20Mg0.21Fe'''0.93Al0.26Cr0.00Ti0.41O4
	G	=	-3352.53	(J)	H	=	-2273.12	(J)	S	=	0.82	(J/K)	V	=	0.09	(cc)	Cp	=	0.37	(J/K)
	chromite	hercynite	magnetite	spinel	ulvospinel
	0	-8.38	46.29	21.19	40.9
apatite	mass	=	0.08	(gm)	density	=	3.06	(gm/cc)
	Ca5(PO4)3OH
	G	=	-1255.8	(J)	H	=	-1008.53	(J)	S	=	0.19	(J/K)	V	=	0.03	(cc)	Cp	=	0.1	(J/K)
Total	solids	mass	=	1.68	(gm)	density	=	3.58	(gm/cc)
	G	=	-22915.1	(J)	H	=	-18127.4	(J)	S	=	3.65	(J/K)	V	=	0.47	(cc)	Cp	=	1.83	(J/K)
Summary	of	all	fractionated	phases:	(total	mass	=	33.37	grams)
clinopyroxene	mass	=	23.71	(gm)	density	=	3.34	(gm/cc)	(analysis	in	mole	%)
	cpx	Na0.02Ca0.84Fe''0.22Mg0.70Fe'''0.08Ti0.09Al0.32Si1.72O6
	G	=	-364678	(J)	H	=	-296247	(J)	S	=	52.11	(J/K)	V	=	7.1	(cc)	Cp	=	27.18	(J/K)
	diopside	clinoenstatit	hedenbergite	alumino-buffo	buffonite	essenite	jadeite
	34.79	13.25	21.75	19.54	-1.78	10.15	2.31
spinel	mass	=	9.17	(gm)	density	=	4.58	(gm/cc)	(analysis	in	mole	%)
	Fe''1.17Mg0.33Fe'''0.76Al0.23Cr0.00Ti0.50O4
	G	=	-81409.8	(J)	H	=	-56280.3	(J)	S	=	19.14	(J/K)	V	=	2	(cc)	Cp	=	8.65	(J/K)
	chromite	hercynite	magnetite	spinel	ulvospinel
	0	-21.24	37.98	32.91	50.35
apatite	mass	=	0.49	(gm)	density	=	3.06	(gm/cc)
	Ca5(PO4)3OH
	G	=	-7419.48	(J)	H	=	-5958.53	(J)	S	=	1.11	(J/K)	V	=	0.16	(cc)	Cp	=	0.57	(J/K)
Viscosity	of	the	System:	3.44	(log	10	poise)
System	mass	=	98.66	(gm)	density	=	2.76	(gm/cc)
	G	=	-1.50074e+06	(J)	H	=	-1.16474e+06	(J)	S	=	255.87	(J/K)	V	=	35.68	(cc)	Cp	=	129.5	(J/K)
Oxygen	delta	moles	=	0.00730955	delta	grams	=	0.233897
	G	=	-2183.4	(J)	H	=	247.08	(J)	S	=	1.85	(J/K)	V	=	798.05	(cc)	Cp	=	0.26	(J/K)
**********----------**********
Title:	Dummy	Title
T	=	1030	(C)	P	=	5	(kbars)	log(10)	f	O2	=	-10.04	delta	HM	=	-5.22	NNO	=	-0.27	QFM	=	0	COH	=	1.77	IW	=	4.08
Constraint	Flags:	fO2	path	=	QFM	Fractionate	Solids
Liquid	mass	=	62.13	(gm)	density	=	2.44	(gm/cc)	viscosity	=	2.85	(log	10	poise)	(analysis	in	wt	%)
	G	=	-1.00263e+06	(J)	H	=	-773888	(J)	S	=	175.53	(J/K)	V	=	25.45	(cc)	Cp	=	89.05	(J/K)
	SiO2	TiO2	Al2O3	Fe2O3	Cr2O3	FeO	MnO	MgO	NiO	CoO	CaO	Na2O	K2O	P2O5	H2O	CO2	SO3	Cl2O-1	F2O-1
	54.12	0.98	18.33	1.32	0	6.19	0.4	1.4	0	0	5.88	4.32	2.03	0.7	4.33	0	0	0	0
clinopyroxene	mass	=	1.07	(gm)	density	=	3.36	(gm/cc)	(analysis	in	mole	%)
	cpx	Na0.03Ca0.85Fe''0.26Mg0.61Fe'''0.09Ti0.09Al0.37Si1.70O6
	G	=	-16189	(J)	H	=	-13155.5	(J)	S	=	2.33	(J/K)	V	=	0.32	(cc)	Cp	=	1.21	(J/K)
	diopside	clinoenstatit	hedenbergite	alumino-buffo	buffonite	essenite	jadeite
	29.02	11.54	26.08	21.06	-3.18	12.36	3.12
spinel	mass	=	0.35	(gm)	density	=	4.69	(gm/cc)	(analysis	in	mole	%)
	Fe''1.20Mg0.20Fe'''0.95Al0.26Cr0.00Ti0.39O4
	G	=	-2907.69	(J)	H	=	-1974.17	(J)	S	=	0.72	(J/K)	V	=	0.07	(cc)	Cp	=	0.32	(J/K)
	chromite	hercynite	magnetite	spinel	ulvospinel
	0	-6.68	47.74	19.72	39.22
apatite	mass	=	0.07	(gm)	density	=	3.06	(gm/cc)
	Ca5(PO4)3OH
	G	=	-1099.07	(J)	H	=	-884.82	(J)	S	=	0.16	(J/K)	V	=	0.02	(cc)	Cp	=	0.08	(J/K)
Total	solids	mass	=	1.49	(gm)	density	=	3.58	(gm/cc)
	G	=	-20195.8	(J)	H	=	-16014.5	(J)	S	=	3.21	(J/K)	V	=	0.42	(cc)	Cp	=	1.62	(J/K)
Summary	of	all	fractionated	phases:	(total	mass	=	35.05	grams)
clinopyroxene	mass	=	24.91	(gm)	density	=	3.34	(gm/cc)	(analysis	in	mole	%)
	cpx	Na0.02Ca0.84Fe''0.22Mg0.70Fe'''0.08Ti0.09Al0.32Si1.72O6
	G	=	-382404	(J)	H	=	-311350	(J)	S	=	54.53	(J/K)	V	=	7.46	(cc)	Cp	=	28.52	(J/K)
	diopside	clinoenstatit	hedenbergite	alumino-buffo	buffonite	essenite	jadeite
	34.55	13.18	21.92	19.6	-1.84	10.23	2.34
spinel	mass	=	9.56	(gm)	density	=	4.58	(gm/cc)	(analysis	in	mole	%)
	Fe''1.18Mg0.32Fe'''0.77Al0.23Cr0.00Ti0.50O4
	G	=	-84545.6	(J)	H	=	-58630.7	(J)	S	=	19.89	(J/K)	V	=	2.09	(cc)	Cp	=	9.01	(J/K)
	chromite	hercynite	magnetite	spinel	ulvospinel
	0	-20.72	38.32	32.44	49.97
apatite	mass	=	0.57	(gm)	density	=	3.06	(gm/cc)
	Ca5(PO4)3OH
	G	=	-8586.63	(J)	H	=	-6912.78	(J)	S	=	1.28	(J/K)	V	=	0.19	(cc)	Cp	=	0.66	(J/K)
Viscosity	of	the	System:	3.58	(log	10	poise)
System	mass	=	98.67	(gm)	density	=	2.77	(gm/cc)
	G	=	-1.49836e+06	(J)	H	=	-1.1668e+06	(J)	S	=	254.43	(J/K)	V	=	35.6	(cc)	Cp	=	128.86	(J/K)
Oxygen	delta	moles	=	0.00762035	delta	grams	=	0.243842
	G	=	-2256.95	(J)	H	=	254.84	(J)	S	=	1.93	(J/K)	V	=	825.65	(cc)	Cp	=	0.27	(J/K)
**********----------**********
Title:	Dummy	Title
T	=	1020	(C)	P	=	5	(kbars)	log(10)	f	O2	=	-10.19	delta	HM	=	-5.22	NNO	=	-0.27	QFM	=	0	COH	=	1.75	IW	=	4.09
Constraint	Flags:	fO2	path	=	QFM	Fractionate	Solids
Liquid	mass	=	60.82	(gm)	density	=	2.43	(gm/cc)	viscosity	=	2.95	(log	10	poise)	(analysis	in	wt	%)
	G	=	-983220	(J)	H	=	-761295	(J)	S	=	171.62	(J/K)	V	=	25.01	(cc)	Cp	=	87.09	(J/K)
	SiO2	TiO2	Al2O3	Fe2O3	Cr2O3	FeO	MnO	MgO	NiO	CoO	CaO	Na2O	K2O	P2O5	H2O	CO2	SO3	Cl2O-1	F2O-1
	54.58	0.88	18.56	1.26	0	5.86	0.41	1.25	0	0	5.62	4.41	2.07	0.68	4.42	0	0	0	0
clinopyroxene	mass	=	0.95	(gm)	density	=	3.37	(gm/cc)	(analysis	in	mole	%)
	cpx	Na0.03Ca0.86Fe''0.27Mg0.60Fe'''0.09Ti0.09Al0.37Si1.69O6
	G	=	-14422.6	(J)	H	=	-11744.1	(J)	S	=	2.07	(J/K)	V	=	0.28	(cc)	Cp	=	1.08	(J/K)
	diopside	clinoenstatit	hedenbergite	alumino-buffo	buffonite	essenite	jadeite
	28.19	11.22	26.73	21.25	-3.4	12.74	3.27
spinel	mass	=	0.31	(gm)	density	=	4.7	(gm/cc)	(analysis	in	mole	%)
	Fe''1.19Mg0.18Fe'''0.98Al0.27Cr0.00Ti0.38O4
	G	=	-2549.15	(J)	H	=	-1733.35	(J)	S	=	0.63	(J/K)	V	=	0.07	(cc)	Cp	=	0.29	(J/K)
	chromite	hercynite	magnetite	spinel	ulvospinel
	0	-5.07	49.2	18.34	37.53
apatite	mass	=	0.06	(gm)	density	=	3.06	(gm/cc)
	Ca5(PO4)3OH
	G	=	-970.08	(J)	H	=	-782.89	(J)	S	=	0.14	(J/K)	V	=	0.02	(cc)	Cp	=	0.07	(J/K)
Total	solids	mass	=	1.33	(gm)	density	=	3.59	(gm/cc)
	G	=	-17941.9	(J)	H	=	-14260.4	(J)	S	=	2.85	(J/K)	V	=	0.37	(cc)	Cp	=	1.44	(J/K)
Summary	of	all	fractionated	phases:	(total	mass	=	36.53	grams)
clinopyroxene	mass	=	25.98	(gm)	density	=	3.34	(gm/cc)	(analysis	in	mole	%)
	cpx	Na0.02Ca0.85Fe''0.22Mg0.69Fe'''0.08Ti0.09Al0.32Si1.72O6
	G	=	-397992	(J)	H	=	-324774	(J)	S	=	56.62	(J/K)	V	=	7.77	(cc)	Cp	=	29.7	(J/K)
	diopside	clinoenstatit	hedenbergite	alumino-buffo	buffonite	essenite	jadeite
	34.33	13.12	22.09	19.66	-1.9	10.32	2.37
spinel	mass	=	9.91	(gm)	density	=	4.59	(gm/cc)	(analysis	in	mole	%)
	Fe''1.18Mg0.32Fe'''0.77Al0.24Cr0.00Ti0.50O4
	G	=	-87230.3	(J)	H	=	-60685.3	(J)	S	=	20.53	(J/K)	V	=	2.16	(cc)	Cp	=	9.32	(J/K)
	chromite	hercynite	magnetite	spinel	ulvospinel
	0	-20.24	38.64	32	49.6
apatite	mass	=	0.64	(gm)	density	=	3.06	(gm/cc)
	Ca5(PO4)3OH
	G	=	-9595.69	(J)	H	=	-7744.04	(J)	S	=	1.43	(J/K)	V	=	0.21	(cc)	Cp	=	0.74	(J/K)
Viscosity	of	the	System:	3.72	(log	10	poise)
System	mass	=	98.67	(gm)	density	=	2.78	(gm/cc)
	G	=	-1.49598e+06	(J)	H	=	-1.16876e+06	(J)	S	=	253.04	(J/K)	V	=	35.52	(cc)	Cp	=	128.28	(J/K)
Oxygen	delta	moles	=	0.00790461	delta	grams	=	0.252938
	G	=	-2321.16	(J)	H	=	261.51	(J)	S	=	2	(J/K)	V	=	849.88	(cc)	Cp	=	0.28	(J/K)
**********----------**********
Title:	Dummy	Title
T	=	1010	(C)	P	=	5	(kbars)	log(10)	f	O2	=	-10.33	delta	HM	=	-5.22	NNO	=	-0.26	QFM	=	0	COH	=	1.74	IW	=	4.11
Constraint	Flags:	fO2	path	=	QFM	Fractionate	Solids
Liquid	mass	=	59.65	(gm)	density	=	2.42	(gm/cc)	viscosity	=	3.04	(log	10	poise)	(analysis	in	wt	%)
	G	=	-965743	(J)	H	=	-750090	(J)	S	=	168.07	(J/K)	V	=	24.61	(cc)	Cp	=	85.33	(J/K)
	SiO2	TiO2	Al2O3	Fe2O3	Cr2O3	FeO	MnO	MgO	NiO	CoO	CaO	Na2O	K2O	P2O5	H2O	CO2	SO3	Cl2O-1	F2O-1
	55.02	0.79	18.77	1.21	0	5.55	0.42	1.11	0	0	5.38	4.49	2.11	0.65	4.5	0	0	0	0
clinopyroxene	mass	=	0.82	(gm)	density	=	3.37	(gm/cc)	(analysis	in	mole	%)
	cpx	Na0.03Ca0.86Fe''0.27Mg0.58Fe'''0.09Ti0.09Al0.38Si1.69O6
	G	=	-12341.3	(J)	H	=	-10069.7	(J)	S	=	1.77	(J/K)	V	=	0.24	(cc)	Cp	=	0.93	(J/K)
	diopside	clinoenstatit	hedenbergite	alumino-buffo	buffonite	essenite	jadeite
	27.48	11.02	27.47	21.12	-3.72	13.18	3.44
clinopyroxene	mass	=	0.04	(gm)	density	=	3.49	(gm/cc)	(analysis	in	mole	%)
	cpx	Na0.03Ca0.93Fe''0.23Mg0.42Fe'''0.10Ti0.31Al0.68Si1.31O6
	G	=	-637.53	(J)	H	=	-521.91	(J)	S	=	0.09	(J/K)	V	=	0.01	(cc)	Cp	=	0.05	(J/K)
	diopside	clinoenstatit	hedenbergite	alumino-buffo	buffonite	essenite	jadeite
	1.02	4.66	22.69	58.69	3.93	6.29	2.72
spinel	mass	=	0.27	(gm)	density	=	4.72	(gm/cc)	(analysis	in	mole	%)
	Fe''1.19Mg0.17Fe'''1.01Al0.27Cr0.00Ti0.36O4
	G	=	-2193.63	(J)	H	=	-1493.98	(J)	S	=	0.55	(J/K)	V	=	0.06	(cc)	Cp	=	0.25	(J/K)
	chromite	hercynite	magnetite	spinel	ulvospinel
	0	-3.5	50.73	17.04	35.73
apatite	mass	=	0.06	(gm)	density	=	3.06	(gm/cc)
	Ca5(PO4)3OH
	G	=	-860.78	(J)	H	=	-696.38	(J)	S	=	0.13	(J/K)	V	=	0.02	(cc)	Cp	=	0.07	(J/K)
Total	solids	mass	=	1.19	(gm)	density	=	3.59	(gm/cc)
	G	=	-16033.2	(J)	H	=	-12781.9	(J)	S	=	2.53	(J/K)	V	=	0.33	(cc)	Cp	=	1.29	(J/K)
Summary	of	all	fractionated	phases:	(total	mass	=	37.84	grams)
clinopyroxene	mass	=	26.93	(gm)	density	=	3.35	(gm/cc)	(analysis	in	mole	%)
	cpx	Na0.02Ca0.85Fe''0.22Mg0.69Fe'''0.08Ti0.09Al0.33Si1.72O6
	G	=	-411795	(J)	H	=	-336798	(J)	S	=	58.45	(J/K)	V	=	8.05	(cc)	Cp	=	30.75	(J/K)
	diopside	clinoenstatit	hedenbergite	alumino-buffo	buffonite	essenite	jadeite
	34.11	13.05	22.26	19.72	-1.95	10.41	2.41
spinel	mass	=	10.22	(gm)	density	=	4.59	(gm/cc)	(analysis	in	mole	%)
	Fe''1.18Mg0.32Fe'''0.78Al0.24Cr0.00Ti0.49O4
	G	=	-89551.2	(J)	H	=	-62501.9	(J)	S	=	21.08	(J/K)	V	=	2.22	(cc)	Cp	=	9.6	(J/K)
	chromite	hercynite	magnetite	spinel	ulvospinel
	0	-19.79	38.95	31.6	49.24
apatite	mass	=	0.7	(gm)	density	=	3.06	(gm/cc)
	Ca5(PO4)3OH
	G	=	-10474.6	(J)	H	=	-8473.98	(J)	S	=	1.56	(J/K)	V	=	0.23	(cc)	Cp	=	0.8	(J/K)
Viscosity	of	the	System:	3.86	(log	10	poise)
System	mass	=	98.68	(gm)	density	=	2.78	(gm/cc)
	G	=	-1.4936e+06	(J)	H	=	-1.17065e+06	(J)	S	=	251.69	(J/K)	V	=	35.44	(cc)	Cp	=	127.76	(J/K)
Oxygen	delta	moles	=	0.00816141	delta	grams	=	0.261155
	G	=	-2375.96	(J)	H	=	267.07	(J)	S	=	2.06	(J/K)	V	=	870.7	(cc)	Cp	=	0.29	(J/K)
**********----------**********
Title:	Dummy	Title
T	=	1000	(C)	P	=	5	(kbars)	log(10)	f	O2	=	-10.48	delta	HM	=	-5.22	NNO	=	-0.25	QFM	=	0	COH	=	1.72	IW	=	4.13
Constraint	Flags:	fO2	path	=	QFM	Fractionate	Solids
Liquid	mass	=	58.6	(gm)	density	=	2.42	(gm/cc)	viscosity	=	3.13	(log	10	poise)	(analysis	in	wt	%)
	G	=	-949899	(J)	H	=	-740061	(J)	S	=	164.82	(J/K)	V	=	24.25	(cc)	Cp	=	83.74	(J/K)
	SiO2	TiO2	Al2O3	Fe2O3	Cr2O3	FeO	MnO	MgO	NiO	CoO	CaO	Na2O	K2O	P2O5	H2O	CO2	SO3	Cl2O-1	F2O-1
	55.42	0.71	18.96	1.16	0	5.26	0.43	0.99	0	0	5.15	4.56	2.15	0.63	4.58	0	0	0	0
clinopyroxene	mass	=	0.72	(gm)	density	=	3.38	(gm/cc)	(analysis	in	mole	%)
	cpx	Na0.04Ca0.85Fe''0.28Mg0.57Fe'''0.10Ti0.08Al0.38Si1.70O6
	G	=	-10768.1	(J)	H	=	-8803.55	(J)	S	=	1.54	(J/K)	V	=	0.21	(cc)	Cp	=	0.81	(J/K)
	diopside	clinoenstatit	hedenbergite	alumino-buffo	buffonite	essenite	jadeite
	26.82	10.88	28.28	20.81	-4.11	13.69	3.63
clinopyroxene	mass	=	0.07	(gm)	density	=	3.5	(gm/cc)	(analysis	in	mole	%)
	cpx	Na0.03Ca0.93Fe''0.23Mg0.40Fe'''0.10Ti0.32Al0.69Si1.30O6
	G	=	-994.97	(J)	H	=	-816.32	(J)	S	=	0.14	(J/K)	V	=	0.02	(cc)	Cp	=	0.07	(J/K)
	diopside	clinoenstatit	hedenbergite	alumino-buffo	buffonite	essenite	jadeite
	-0.21	4.43	23.26	59.55	3.88	6.32	2.78
spinel	mass	=	0.24	(gm)	density	=	4.73	(gm/cc)	(analysis	in	mole	%)
	Fe''1.18Mg0.16Fe'''1.05Al0.28Cr0.00Ti0.34O4
	G	=	-1926.37	(J)	H	=	-1314.22	(J)	S	=	0.48	(J/K)	V	=	0.05	(cc)	Cp	=	0.22	(J/K)
	chromite	hercynite	magnetite	spinel	ulvospinel
	0	-1.98	52.3	15.81	33.87
apatite	mass	=	0.05	(gm)	density	=	3.06	(gm/cc)
	Ca5(PO4)3OH
	G	=	-769.3	(J)	H	=	-623.88	(J)	S	=	0.11	(J/K)	V	=	0.02	(cc)	Cp	=	0.06	(J/K)
Total	solids	mass	=	1.07	(gm)	density	=	3.6	(gm/cc)
	G	=	-14458.7	(J)	H	=	-11558	(J)	S	=	2.28	(J/K)	V	=	0.3	(cc)	Cp	=	1.16	(J/K)
Summary	of	all	fractionated	phases:	(total	mass	=	39.02	grams)
clinopyroxene	mass	=	27.74	(gm)	density	=	3.35	(gm/cc)	(analysis	in	mole	%)
	cpx	Na0.02Ca0.85Fe''0.22Mg0.69Fe'''0.08Ti0.09Al0.33Si1.72O6
	G	=	-423502	(J)	H	=	-347156	(J)	S	=	59.97	(J/K)	V	=	8.29	(cc)	Cp	=	31.64	(J/K)
	diopside	clinoenstatit	hedenbergite	alumino-buffo	buffonite	essenite	jadeite
	33.92	12.99	22.41	19.76	-2	10.49	2.44
clinopyroxene	mass	=	0.04	(gm)	density	=	3.5	(gm/cc)	(analysis	in	mole	%)
	cpx	Na0.03Ca0.93Fe''0.23Mg0.42Fe'''0.10Ti0.31Al0.68Si1.31O6
	G	=	-601.81	(J)	H	=	-493.81	(J)	S	=	0.08	(J/K)	V	=	0.01	(cc)	Cp	=	0.04	(J/K)
	diopside	clinoenstatit	hedenbergite	alumino-buffo	buffonite	essenite	jadeite
	1.02	4.66	22.69	58.69	3.93	6.29	2.72
spinel	mass	=	10.48	(gm)	density	=	4.6	(gm/cc)	(analysis	in	mole	%)
	Fe''1.18Mg0.31Fe'''0.78Al0.24Cr0.00Ti0.49O4
	G	=	-91512.1	(J)	H	=	-64081.4	(J)	S	=	21.55	(J/K)	V	=	2.28	(cc)	Cp	=	9.83	(J/K)
	chromite	hercynite	magnetite	spinel	ulvospinel
	0	-19.39	39.24	31.24	48.91
apatite	mass	=	0.75	(gm)	density	=	3.06	(gm/cc)
	Ca5(PO4)3OH
	G	=	-11243.2	(J)	H	=	-9117.95	(J)	S	=	1.67	(J/K)	V	=	0.24	(cc)	Cp	=	0.86	(J/K)
Viscosity	of	the	System:	3.99	(log	10	poise)
System	mass	=	98.69	(gm)	density	=	2.79	(gm/cc)
	G	=	-1.49122e+06	(J)	H	=	-1.17247e+06	(J)	S	=	250.36	(J/K)	V	=	35.37	(cc)	Cp	=	127.28	(J/K)
Oxygen	delta	moles	=	0.00839709	delta	grams	=	0.268697
	G	=	-2423.39	(J)	H	=	271.77	(J)	S	=	2.12	(J/K)	V	=	888.86	(cc)	Cp	=	0.3	(J/K)
**********----------**********
Title:	Dummy	Title
T	=	990	(C)	P	=	5	(kbars)	log(10)	f	O2	=	-10.62	delta	HM	=	-5.23	NNO	=	-0.25	QFM	=	0	COH	=	1.71	IW	=	4.15
Constraint	Flags:	fO2	path	=	QFM	Fractionate	Solids
Liquid	mass	=	57.65	(gm)	density	=	2.41	(gm/cc)	viscosity	=	3.22	(log	10	poise)	(analysis	in	wt	%)
	G	=	-935447	(J)	H	=	-731040	(J)	S	=	161.82	(J/K)	V	=	23.92	(cc)	Cp	=	82.29	(J/K)
	SiO2	TiO2	Al2O3	Fe2O3	Cr2O3	FeO	MnO	MgO	NiO	CoO	CaO	Na2O	K2O	P2O5	H2O	CO2	SO3	Cl2O-1	F2O-1
	55.81	0.63	19.13	1.11	0	4.98	0.43	0.88	0	0	4.94	4.63	2.19	0.61	4.66	0	0	0	0
clinopyroxene	mass	=	0.65	(gm)	density	=	3.38	(gm/cc)	(analysis	in	mole	%)
	cpx	Na0.04Ca0.85Fe''0.29Mg0.56Fe'''0.10Ti0.08Al0.39Si1.70O6
	G	=	-9777.69	(J)	H	=	-8009.7	(J)	S	=	1.4	(J/K)	V	=	0.19	(cc)	Cp	=	0.73	(J/K)
	diopside	clinoenstatit	hedenbergite	alumino-buffo	buffonite	essenite	jadeite
	26.1	10.71	29.09	20.55	-4.49	14.22	3.83
clinopyroxene	mass	=	0.06	(gm)	density	=	3.51	(gm/cc)	(analysis	in	mole	%)
	cpx	Na0.03Ca0.93Fe''0.24Mg0.39Fe'''0.10Ti0.32Al0.70Si1.29O6
	G	=	-876.1	(J)	H	=	-720.36	(J)	S	=	0.12	(J/K)	V	=	0.02	(cc)	Cp	=	0.06	(J/K)
	diopside	clinoenstatit	hedenbergite	alumino-buffo	buffonite	essenite	jadeite
	-1.44	4.2	23.86	60.36	3.83	6.35	2.84
spinel	mass	=	0.22	(gm)	density	=	4.74	(gm/cc)	(analysis	in	mole	%)
	Fe''1.17Mg0.15Fe'''1.08Al0.28Cr0.00Ti0.32O4
	G	=	-1744.72	(J)	H	=	-1192.55	(J)	S	=	0.44	(J/K)	V	=	0.05	(cc)	Cp	=	0.2	(J/K)
	chromite	hercynite	magnetite	spinel	ulvospinel
	0	-0.54	53.84	14.67	32.04
apatite	mass	=	0.05	(gm)	density	=	3.06	(gm/cc)
	Ca5(PO4)3OH
	G	=	-691.96	(J)	H	=	-562.52	(J)	S	=	0.1	(J/K)	V	=	0.02	(cc)	Cp	=	0.05	(J/K)
Total	solids	mass	=	0.97	(gm)	density	=	3.6	(gm/cc)
	G	=	-13090.5	(J)	H	=	-10485.1	(J)	S	=	2.06	(J/K)	V	=	0.27	(cc)	Cp	=	1.05	(J/K)
Summary	of	all	fractionated	phases:	(total	mass	=	40.08	grams)
clinopyroxene	mass	=	28.46	(gm)	density	=	3.35	(gm/cc)	(analysis	in	mole	%)
	cpx	Na0.02Ca0.85Fe''0.23Mg0.68Fe'''0.09Ti0.09Al0.33Si1.72O6
	G	=	-433623	(J)	H	=	-356256	(J)	S	=	61.25	(J/K)	V	=	8.5	(cc)	Cp	=	32.42	(J/K)
	diopside	clinoenstatit	hedenbergite	alumino-buffo	buffonite	essenite	jadeite
	33.74	12.94	22.55	19.79	-2.05	10.57	2.47
clinopyroxene	mass	=	0.1	(gm)	density	=	3.5	(gm/cc)	(analysis	in	mole	%)
	cpx	Na0.03Ca0.93Fe''0.23Mg0.41Fe'''0.10Ti0.32Al0.68Si1.31O6
	G	=	-1559.76	(J)	H	=	-1282.72	(J)	S	=	0.22	(J/K)	V	=	0.03	(cc)	Cp	=	0.12	(J/K)
	diopside	clinoenstatit	hedenbergite	alumino-buffo	buffonite	essenite	jadeite
	0.26	4.52	23.04	59.22	3.9	6.3	2.76
spinel	mass	=	10.72	(gm)	density	=	4.6	(gm/cc)	(analysis	in	mole	%)
	Fe''1.18Mg0.31Fe'''0.79Al0.24Cr0.00Ti0.49O4
	G	=	-93201.8	(J)	H	=	-65483.3	(J)	S	=	21.94	(J/K)	V	=	2.33	(cc)	Cp	=	10.04	(J/K)
	chromite	hercynite	magnetite	spinel	ulvospinel
	0	-19.01	39.52	30.9	48.58
apatite	mass	=	0.8	(gm)	density	=	3.06	(gm/cc)
	Ca5(PO4)3OH
	G	=	-11919.5	(J)	H	=	-9689.88	(J)	S	=	1.77	(J/K)	V	=	0.26	(cc)	Cp	=	0.91	(J/K)
Viscosity	of	the	System:	4.12	(log	10	poise)
System	mass	=	98.7	(gm)	density	=	2.8	(gm/cc)
	G	=	-1.48884e+06	(J)	H	=	-1.17424e+06	(J)	S	=	249.06	(J/K)	V	=	35.3	(cc)	Cp	=	126.83	(J/K)
Oxygen	delta	moles	=	0.00861842	delta	grams	=	0.275779
	G	=	-2465.55	(J)	H	=	275.84	(J)	S	=	2.17	(J/K)	V	=	905.12	(cc)	Cp	=	0.31	(J/K)
**********----------**********
Title:	Dummy	Title
T	=	980	(C)	P	=	5	(kbars)	log(10)	f	O2	=	-10.78	delta	HM	=	-5.23	NNO	=	-0.24	QFM	=	0	COH	=	1.69	IW	=	4.17
Constraint	Flags:	fO2	path	=	QFM	Fractionate	Solids
Liquid	mass	=	56.64	(gm)	density	=	2.4	(gm/cc)	viscosity	=	3.31	(log	10	poise)	(analysis	in	wt	%)
	G	=	-920089	(J)	H	=	-721193	(J)	S	=	158.72	(J/K)	V	=	23.57	(cc)	Cp	=	80.79	(J/K)
	SiO2	TiO2	Al2O3	Fe2O3	Cr2O3	FeO	MnO	MgO	NiO	CoO	CaO	Na2O	K2O	P2O5	H2O	CO2	SO3	Cl2O-1	F2O-1
	56.19	0.57	19.27	1.06	0	4.7	0.44	0.79	0	0	4.73	4.7	2.22	0.6	4.74	0	0	0	0
clinopyroxene	mass	=	0.58	(gm)	density	=	3.38	(gm/cc)	(analysis	in	mole	%)
	cpx	Na0.04Ca0.85Fe''0.30Mg0.54Fe'''0.10Ti0.08Al0.39Si1.70O6
	G	=	-8620.49	(J)	H	=	-7076.02	(J)	S	=	1.23	(J/K)	V	=	0.17	(cc)	Cp	=	0.65	(J/K)
	diopside	clinoenstatit	hedenbergite	alumino-buffo	buffonite	essenite	jadeite
	25.47	10.59	29.85	20.23	-4.83	14.65	4.03
clinopyroxene	mass	=	0.02	(gm)	density	=	3.51	(gm/cc)	(analysis	in	mole	%)
	cpx	Na0.03Ca0.93Fe''0.24Mg0.38Fe'''0.10Ti0.32Al0.70Si1.29O6
	G	=	-331.92	(J)	H	=	-273.52	(J)	S	=	0.05	(J/K)	V	=	0.01	(cc)	Cp	=	0.02	(J/K)
	diopside	clinoenstatit	hedenbergite	alumino-buffo	buffonite	essenite	jadeite
	-2.6	4	24.4	61.18	3.8	6.32	2.9
feldspar	mass	=	0.16	(gm)	density	=	2.67	(gm/cc)	(analysis	in	mole	%)
	K0.01Na0.35Ca0.64Al1.64Si2.36O8
	G	=	-2681.03	(J)	H	=	-2224.33	(J)	S	=	0.36	(J/K)	V	=	0.06	(cc)	Cp	=	0.19	(J/K)
	albite	anorthite	sanidine
	34.96	64.04	1
spinel	mass	=	0.22	(gm)	density	=	4.75	(gm/cc)	(analysis	in	mole	%)
	Fe''1.17Mg0.14Fe'''1.10Al0.29Cr0.00Ti0.30O4
	G	=	-1781.69	(J)	H	=	-1220.41	(J)	S	=	0.45	(J/K)	V	=	0.05	(cc)	Cp	=	0.21	(J/K)
	chromite	hercynite	magnetite	spinel	ulvospinel
	0	0.65	55.21	13.69	30.46
apatite	mass	=	0.04	(gm)	density	=	3.06	(gm/cc)
	Ca5(PO4)3OH
	G	=	-613.17	(J)	H	=	-499.69	(J)	S	=	0.09	(J/K)	V	=	0.01	(cc)	Cp	=	0.05	(J/K)
Total	solids	mass	=	1.02	(gm)	density	=	3.45	(gm/cc)
	G	=	-14028.3	(J)	H	=	-11294	(J)	S	=	2.18	(J/K)	V	=	0.3	(cc)	Cp	=	1.12	(J/K)
Summary	of	all	fractionated	phases:	(total	mass	=	41.04	grams)
clinopyroxene	mass	=	29.11	(gm)	density	=	3.35	(gm/cc)	(analysis	in	mole	%)
	cpx	Na0.02Ca0.85Fe''0.23Mg0.68Fe'''0.09Ti0.09Al0.33Si1.72O6
	G	=	-442742	(J)	H	=	-364569	(J)	S	=	62.38	(J/K)	V	=	8.69	(cc)	Cp	=	33.12	(J/K)
	diopside	clinoenstatit	hedenbergite	alumino-buffo	buffonite	essenite	jadeite
	33.58	12.89	22.7	19.8	-2.11	10.65	2.5
clinopyroxene	mass	=	0.16	(gm)	density	=	3.5	(gm/cc)	(analysis	in	mole	%)
	cpx	Na0.03Ca0.93Fe''0.23Mg0.40Fe'''0.10Ti0.32Al0.69Si1.30O6
	G	=	-2397.74	(J)	H	=	-1976.27	(J)	S	=	0.34	(J/K)	V	=	0.05	(cc)	Cp	=	0.18	(J/K)
	diopside	clinoenstatit	hedenbergite	alumino-buffo	buffonite	essenite	jadeite
	-0.33	4.41	23.33	59.62	3.88	6.32	2.79
spinel	mass	=	10.93	(gm)	density	=	4.61	(gm/cc)	(analysis	in	mole	%)
	Fe''1.18Mg0.31Fe'''0.80Al0.24Cr0.00Ti0.48O4
	G	=	-94706.6	(J)	H	=	-66765.5	(J)	S	=	22.3	(J/K)	V	=	2.37	(cc)	Cp	=	10.23	(J/K)
	chromite	hercynite	magnetite	spinel	ulvospinel
	0	-18.66	39.8	30.59	48.27
apatite	mass	=	0.84	(gm)	density	=	3.06	(gm/cc)
	Ca5(PO4)3OH
	G	=	-12517.7	(J)	H	=	-10200.9	(J)	S	=	1.85	(J/K)	V	=	0.27	(cc)	Cp	=	0.96	(J/K)
Viscosity	of	the	System:	4.25	(log	10	poise)
System	mass	=	98.7	(gm)	density	=	2.8	(gm/cc)
	G	=	-1.48648e+06	(J)	H	=	-1.176e+06	(J)	S	=	247.76	(J/K)	V	=	35.24	(cc)	Cp	=	126.4	(J/K)
Oxygen	delta	moles	=	0.00884489	delta	grams	=	0.283026
	G	=	-2508.08	(J)	H	=	279.92	(J)	S	=	2.22	(J/K)	V	=	921.56	(cc)	Cp	=	0.32	(J/K)
**********----------**********
Title:	Dummy	Title
T	=	970	(C)	P	=	5	(kbars)	log(10)	f	O2	=	-10.93	delta	HM	=	-5.23	NNO	=	-0.24	QFM	=	0	COH	=	1.68	IW	=	4.19
Constraint	Flags:	fO2	path	=	QFM	Fractionate	Solids
Liquid	mass	=	54.83	(gm)	density	=	2.39	(gm/cc)	viscosity	=	3.36	(log	10	poise)	(analysis	in	wt	%)
	G	=	-891612	(J)	H	=	-700623	(J)	S	=	153.63	(J/K)	V	=	22.91	(cc)	Cp	=	78.17	(J/K)
	SiO2	TiO2	Al2O3	Fe2O3	Cr2O3	FeO	MnO	MgO	NiO	CoO	CaO	Na2O	K2O	P2O5	H2O	CO2	SO3	Cl2O-1	F2O-1
	56.66	0.51	19.15	1.02	0	4.43	0.46	0.75	0	0	4.49	4.75	2.29	0.6	4.89	0	0	0	0
clinopyroxene	mass	=	0.24	(gm)	density	=	3.38	(gm/cc)	(analysis	in	mole	%)
	cpx	Na0.04Ca0.84Fe''0.31Mg0.56Fe'''0.09Ti0.06Al0.37Si1.73O6
	G	=	-3606.46	(J)	H	=	-2966.92	(J)	S	=	0.51	(J/K)	V	=	0.07	(cc)	Cp	=	0.27	(J/K)
	diopside	clinoenstatit	hedenbergite	alumino-buffo	buffonite	essenite	jadeite
	26.26	11.61	30.57	18.13	-5.26	14.52	4.17
feldspar	mass	=	1.24	(gm)	density	=	2.67	(gm/cc)	(analysis	in	mole	%)
	K0.01Na0.37Ca0.62Al1.62Si2.38O8
	G	=	-20641.1	(J)	H	=	-17157.7	(J)	S	=	2.8	(J/K)	V	=	0.46	(cc)	Cp	=	1.5	(J/K)
	albite	anorthite	sanidine
	36.94	61.98	1.08
spinel	mass	=	0.32	(gm)	density	=	4.76	(gm/cc)	(analysis	in	mole	%)
	Fe''1.16Mg0.13Fe'''1.13Al0.28Cr0.00Ti0.30O4
	G	=	-2555.07	(J)	H	=	-1754.34	(J)	S	=	0.64	(J/K)	V	=	0.07	(cc)	Cp	=	0.3	(J/K)
	chromite	hercynite	magnetite	spinel	ulvospinel
	0	0.75	56.26	13.33	29.66
apatite	mass	=	0.03	(gm)	density	=	3.06	(gm/cc)
	Ca5(PO4)3OH
	G	=	-462.41	(J)	H	=	-377.74	(J)	S	=	0.07	(J/K)	V	=	0.01	(cc)	Cp	=	0.04	(J/K)
Total	solids	mass	=	1.83	(gm)	density	=	2.99	(gm/cc)
	G	=	-27265	(J)	H	=	-22256.7	(J)	S	=	4.03	(J/K)	V	=	0.61	(cc)	Cp	=	2.1	(J/K)
Summary	of	all	fractionated	phases:	(total	mass	=	42.05	grams)
clinopyroxene	mass	=	29.68	(gm)	density	=	3.35	(gm/cc)	(analysis	in	mole	%)
	cpx	Na0.03Ca0.85Fe''0.23Mg0.68Fe'''0.09Ti0.09Al0.33Si1.72O6
	G	=	-450694	(J)	H	=	-371954	(J)	S	=	63.34	(J/K)	V	=	8.85	(cc)	Cp	=	33.73	(J/K)
	diopside	clinoenstatit	hedenbergite	alumino-buffo	buffonite	essenite	jadeite
	33.42	12.84	22.83	19.81	-2.16	10.72	2.53
clinopyroxene	mass	=	0.18	(gm)	density	=	3.51	(gm/cc)	(analysis	in	mole	%)
	cpx	Na0.03Ca0.93Fe''0.23Mg0.40Fe'''0.10Ti0.32Al0.69Si1.30O6
	G	=	-2691.18	(J)	H	=	-2223.19	(J)	S	=	0.38	(J/K)	V	=	0.05	(cc)	Cp	=	0.2	(J/K)
	diopside	clinoenstatit	hedenbergite	alumino-buffo	buffonite	essenite	jadeite
	-0.58	4.36	23.45	59.79	3.87	6.32	2.8
feldspar	mass	=	0.16	(gm)	density	=	2.67	(gm/cc)	(analysis	in	mole	%)
	K0.01Na0.35Ca0.64Al1.64Si2.36O8
	G	=	-2631.92	(J)	H	=	-2188.46	(J)	S	=	0.36	(J/K)	V	=	0.06	(cc)	Cp	=	0.19	(J/K)
	albite	anorthite	sanidine
	34.96	64.04	1
spinel	mass	=	11.15	(gm)	density	=	4.61	(gm/cc)	(analysis	in	mole	%)
	Fe''1.18Mg0.30Fe'''0.80Al0.24Cr0.00Ti0.48O4
	G	=	-96244.9	(J)	H	=	-68077.3	(J)	S	=	22.66	(J/K)	V	=	2.42	(cc)	Cp	=	10.42	(J/K)
	chromite	hercynite	magnetite	spinel	ulvospinel
	0	-18.28	40.1	30.27	47.92
apatite	mass	=	0.87	(gm)	density	=	3.06	(gm/cc)
	Ca5(PO4)3OH
	G	=	-13036.5	(J)	H	=	-10649.4	(J)	S	=	1.92	(J/K)	V	=	0.29	(cc)	Cp	=	1	(J/K)
Viscosity	of	the	System:	4.4	(log	10	poise)
System	mass	=	98.71	(gm)	density	=	2.81	(gm/cc)
	G	=	-1.48418e+06	(J)	H	=	-1.17797e+06	(J)	S	=	246.31	(J/K)	V	=	35.19	(cc)	Cp	=	125.81	(J/K)
Oxygen	delta	moles	=	0.00914699	delta	grams	=	0.292693
	G	=	-2570.75	(J)	H	=	286.21	(J)	S	=	2.3	(J/K)	V	=	945.43	(cc)	Cp	=	0.33	(J/K)
**********----------**********
Title:	Dummy	Title
T	=	960	(C)	P	=	5	(kbars)	log(10)	f	O2	=	-11.08	delta	HM	=	-5.23	NNO	=	-0.23	QFM	=	0	COH	=	1.66	IW	=	4.21
Constraint	Flags:	fO2	path	=	QFM	Fractionate	Solids
Liquid	mass	=	53.14	(gm)	density	=	2.38	(gm/cc)	viscosity	=	3.42	(log	10	poise)	(analysis	in	wt	%)
	G	=	-864819	(J)	H	=	-681258	(J)	S	=	148.86	(J/K)	V	=	22.28	(cc)	Cp	=	75.71	(J/K)
	SiO2	TiO2	Al2O3	Fe2O3	Cr2O3	FeO	MnO	MgO	NiO	CoO	CaO	Na2O	K2O	P2O5	H2O	CO2	SO3	Cl2O-1	F2O-1
	57.11	0.46	19.02	0.97	0	4.17	0.47	0.73	0	0	4.25	4.8	2.36	0.6	5.05	0	0	0	0
clinopyroxene	mass	=	0.21	(gm)	density	=	3.37	(gm/cc)	(analysis	in	mole	%)
	cpx	Na0.04Ca0.83Fe''0.31Mg0.57Fe'''0.09Ti0.05Al0.35Si1.75O6
	G	=	-3084.89	(J)	H	=	-2543.49	(J)	S	=	0.44	(J/K)	V	=	0.06	(cc)	Cp	=	0.23	(J/K)
	diopside	clinoenstatit	hedenbergite	alumino-buffo	buffonite	essenite	jadeite
	26.59	12.61	31.25	16.5	-5.53	14.28	4.3
feldspar	mass	=	1.19	(gm)	density	=	2.67	(gm/cc)	(analysis	in	mole	%)
	K0.01Na0.39Ca0.60Al1.60Si2.40O8
	G	=	-19789.7	(J)	H	=	-16481.4	(J)	S	=	2.68	(J/K)	V	=	0.45	(cc)	Cp	=	1.44	(J/K)
	albite	anorthite	sanidine
	38.96	59.86	1.17
spinel	mass	=	0.29	(gm)	density	=	4.77	(gm/cc)	(analysis	in	mole	%)
	Fe''1.16Mg0.13Fe'''1.15Al0.28Cr0.00Ti0.29O4
	G	=	-2304.36	(J)	H	=	-1586.08	(J)	S	=	0.58	(J/K)	V	=	0.06	(cc)	Cp	=	0.27	(J/K)
	chromite	hercynite	magnetite	spinel	ulvospinel
	0	0.85	57.31	12.99	28.85
apatite	mass	=	0.03	(gm)	density	=	3.06	(gm/cc)
	Ca5(PO4)3OH
	G	=	-403.67	(J)	H	=	-330.55	(J)	S	=	0.06	(J/K)	V	=	0.01	(cc)	Cp	=	0.03	(J/K)
Total	solids	mass	=	1.72	(gm)	density	=	2.97	(gm/cc)
	G	=	-25582.6	(J)	H	=	-20941.5	(J)	S	=	3.76	(J/K)	V	=	0.58	(cc)	Cp	=	1.97	(J/K)
Summary	of	all	fractionated	phases:	(total	mass	=	43.87	grams)
clinopyroxene	mass	=	29.92	(gm)	density	=	3.35	(gm/cc)	(analysis	in	mole	%)
	cpx	Na0.03Ca0.85Fe''0.23Mg0.68Fe'''0.09Ti0.09Al0.33Si1.72O6
	G	=	-453630	(J)	H	=	-375233	(J)	S	=	63.57	(J/K)	V	=	8.92	(cc)	Cp	=	33.97	(J/K)
	diopside	clinoenstatit	hedenbergite	alumino-buffo	buffonite	essenite	jadeite
	33.36	12.83	22.9	19.8	-2.18	10.75	2.54
clinopyroxene	mass	=	0.18	(gm)	density	=	3.51	(gm/cc)	(analysis	in	mole	%)
	cpx	Na0.03Ca0.93Fe''0.23Mg0.40Fe'''0.10Ti0.32Al0.69Si1.30O6
	G	=	-2687.42	(J)	H	=	-2225.18	(J)	S	=	0.37	(J/K)	V	=	0.05	(cc)	Cp	=	0.2	(J/K)
	diopside	clinoenstatit	hedenbergite	alumino-buffo	buffonite	essenite	jadeite
	-0.58	4.36	23.45	59.79	3.87	6.32	2.8
feldspar	mass	=	1.39	(gm)	density	=	2.67	(gm/cc)	(analysis	in	mole	%)
	K0.01Na0.37Ca0.62Al1.62Si2.38O8
	G	=	-23196.1	(J)	H	=	-19325.3	(J)	S	=	3.14	(J/K)	V	=	0.52	(cc)	Cp	=	1.68	(J/K)
	albite	anorthite	sanidine
	36.71	62.21	1.07
spinel	mass	=	11.48	(gm)	density	=	4.62	(gm/cc)	(analysis	in	mole	%)
	Fe''1.18Mg0.30Fe'''0.81Al0.24Cr0.00Ti0.47O4
	G	=	-98551.6	(J)	H	=	-69925.5	(J)	S	=	23.21	(J/K)	V	=	2.49	(cc)	Cp	=	10.7	(J/K)
	chromite	hercynite	magnetite	spinel	ulvospinel
	0	-17.76	40.54	29.8	47.42
apatite	mass	=	0.9	(gm)	density	=	3.06	(gm/cc)
	Ca5(PO4)3OH
	G	=	-13404.2	(J)	H	=	-10976.1	(J)	S	=	1.97	(J/K)	V	=	0.29	(cc)	Cp	=	1.03	(J/K)
Viscosity	of	the	System:	4.56	(log	10	poise)
System	mass	=	98.72	(gm)	density	=	2.81	(gm/cc)
	G	=	-1.48187e+06	(J)	H	=	-1.17988e+06	(J)	S	=	244.89	(J/K)	V	=	35.13	(cc)	Cp	=	125.26	(J/K)
Oxygen	delta	moles	=	0.0094244	delta	grams	=	0.301569
	G	=	-2625.05	(J)	H	=	291.52	(J)	S	=	2.37	(J/K)	V	=	966.26	(cc)	Cp	=	0.34	(J/K)
**********----------**********
Title:	Dummy	Title
T	=	950	(C)	P	=	5	(kbars)	log(10)	f	O2	=	-11.24	delta	HM	=	-5.23	NNO	=	-0.22	QFM	=	0	COH	=	1.64	IW	=	4.22
Constraint	Flags:	fO2	path	=	QFM	Fractionate	Solids
Liquid	mass	=	51.54	(gm)	density	=	2.38	(gm/cc)	viscosity	=	3.47	(log	10	poise)	(analysis	in	wt	%)
	G	=	-839507	(J)	H	=	-662946	(J)	S	=	144.35	(J/K)	V	=	21.7	(cc)	Cp	=	73.4	(J/K)
	SiO2	TiO2	Al2O3	Fe2O3	Cr2O3	FeO	MnO	MgO	NiO	CoO	CaO	Na2O	K2O	P2O5	H2O	CO2	SO3	Cl2O-1	F2O-1
	57.52	0.42	18.9	0.93	0	3.93	0.49	0.7	0	0	4.03	4.85	2.43	0.6	5.21	0	0	0	0
clinopyroxene	mass	=	0.18	(gm)	density	=	3.37	(gm/cc)	(analysis	in	mole	%)
	cpx	Na0.04Ca0.82Fe''0.32Mg0.59Fe'''0.08Ti0.05Al0.34Si1.77O6
	G	=	-2653.98	(J)	H	=	-2193.05	(J)	S	=	0.38	(J/K)	V	=	0.05	(cc)	Cp	=	0.2	(J/K)
	diopside	clinoenstatit	hedenbergite	alumino-buffo	buffonite	essenite	jadeite
	26.58	13.68	31.92	15.15	-5.7	13.96	4.41
feldspar	mass	=	1.15	(gm)	density	=	2.66	(gm/cc)	(analysis	in	mole	%)
	K0.01Na0.41Ca0.58Al1.58Si2.42O8
	G	=	-19048.3	(J)	H	=	-15894.2	(J)	S	=	2.58	(J/K)	V	=	0.43	(cc)	Cp	=	1.39	(J/K)
	albite	anorthite	sanidine
	41.02	57.71	1.27
spinel	mass	=	0.27	(gm)	density	=	4.78	(gm/cc)	(analysis	in	mole	%)
	Fe''1.15Mg0.13Fe'''1.17Al0.27Cr0.00Ti0.28O4
	G	=	-2085.98	(J)	H	=	-1439.39	(J)	S	=	0.53	(J/K)	V	=	0.06	(cc)	Cp	=	0.24	(J/K)
	chromite	hercynite	magnetite	spinel	ulvospinel
	0	0.92	58.36	12.68	28.03
apatite	mass	=	0.02	(gm)	density	=	3.06	(gm/cc)
	Ca5(PO4)3OH
	G	=	-349.62	(J)	H	=	-286.98	(J)	S	=	0.05	(J/K)	V	=	0.01	(cc)	Cp	=	0.03	(J/K)
Total	solids	mass	=	1.61	(gm)	density	=	2.95	(gm/cc)
	G	=	-24137.9	(J)	H	=	-19813.6	(J)	S	=	3.54	(J/K)	V	=	0.55	(cc)	Cp	=	1.86	(J/K)
Summary	of	all	fractionated	phases:	(total	mass	=	45.58	grams)
clinopyroxene	mass	=	30.13	(gm)	density	=	3.36	(gm/cc)	(analysis	in	mole	%)
	cpx	Na0.03Ca0.85Fe''0.23Mg0.68Fe'''0.09Ti0.09Al0.33Si1.72O6
	G	=	-456042	(J)	H	=	-378090	(J)	S	=	63.73	(J/K)	V	=	8.98	(cc)	Cp	=	34.17	(J/K)
	diopside	clinoenstatit	hedenbergite	alumino-buffo	buffonite	essenite	jadeite
	33.32	12.83	22.95	19.78	-2.21	10.78	2.55
clinopyroxene	mass	=	0.18	(gm)	density	=	3.51	(gm/cc)	(analysis	in	mole	%)
	cpx	Na0.03Ca0.93Fe''0.23Mg0.40Fe'''0.10Ti0.32Al0.69Si1.30O6
	G	=	-2683.68	(J)	H	=	-2227.18	(J)	S	=	0.37	(J/K)	V	=	0.05	(cc)	Cp	=	0.2	(J/K)
	diopside	clinoenstatit	hedenbergite	alumino-buffo	buffonite	essenite	jadeite
	-0.58	4.36	23.45	59.79	3.87	6.32	2.8
feldspar	mass	=	2.58	(gm)	density	=	2.67	(gm/cc)	(analysis	in	mole	%)
	K0.01Na0.38Ca0.61Al1.61Si2.39O8
	G	=	-42882.4	(J)	H	=	-35800.1	(J)	S	=	5.79	(J/K)	V	=	0.97	(cc)	Cp	=	3.11	(J/K)
	albite	anorthite	sanidine
	37.75	61.13	1.12
spinel	mass	=	11.77	(gm)	density	=	4.62	(gm/cc)	(analysis	in	mole	%)
	Fe''1.18Mg0.29Fe'''0.82Al0.24Cr0.00Ti0.47O4
	G	=	-100603	(J)	H	=	-71608.1	(J)	S	=	23.7	(J/K)	V	=	2.55	(cc)	Cp	=	10.96	(J/K)
	chromite	hercynite	magnetite	spinel	ulvospinel
	0	-17.32	40.94	29.4	46.97
apatite	mass	=	0.92	(gm)	density	=	3.06	(gm/cc)
	Ca5(PO4)3OH
	G	=	-13712.9	(J)	H	=	-11255.9	(J)	S	=	2.01	(J/K)	V	=	0.3	(cc)	Cp	=	1.05	(J/K)
Viscosity	of	the	System:	4.72	(log	10	poise)
System	mass	=	98.73	(gm)	density	=	2.81	(gm/cc)
	G	=	-1.47957e+06	(J)	H	=	-1.18174e+06	(J)	S	=	243.49	(J/K)	V	=	35.08	(cc)	Cp	=	124.75	(J/K)
Oxygen	delta	moles	=	0.00968007	delta	grams	=	0.309751
	G	=	-2671.99	(J)	H	=	295.97	(J)	S	=	2.43	(J/K)	V	=	984.43	(cc)	Cp	=	0.35	(J/K)
**********----------**********
Title:	Dummy	Title
T	=	940	(C)	P	=	5	(kbars)	log(10)	f	O2	=	-11.4	delta	HM	=	-5.23	NNO	=	-0.21	QFM	=	0	COH	=	1.63	IW	=	4.24
Constraint	Flags:	fO2	path	=	QFM	Fractionate	Solids
Liquid	mass	=	50.04	(gm)	density	=	2.37	(gm/cc)	viscosity	=	3.51	(log	10	poise)	(analysis	in	wt	%)
	G	=	-815506	(J)	H	=	-645566	(J)	S	=	140.08	(J/K)	V	=	21.13	(cc)	Cp	=	71.22	(J/K)
	SiO2	TiO2	Al2O3	Fe2O3	Cr2O3	FeO	MnO	MgO	NiO	CoO	CaO	Na2O	K2O	P2O5	H2O	CO2	SO3	Cl2O-1	F2O-1
	57.92	0.38	18.77	0.89	0	3.7	0.5	0.68	0	0	3.82	4.88	2.5	0.61	5.36	0	0	0	0
clinopyroxene	mass	=	0.15	(gm)	density	=	3.37	(gm/cc)	(analysis	in	mole	%)
	cpx	Na0.05Ca0.81Fe''0.33Mg0.60Fe'''0.08Ti0.04Al0.32Si1.78O6
	G	=	-2283.09	(J)	H	=	-1890.68	(J)	S	=	0.32	(J/K)	V	=	0.05	(cc)	Cp	=	0.17	(J/K)
	diopside	clinoenstatit	hedenbergite	alumino-buffo	buffonite	essenite	jadeite
	26.24	14.86	32.65	13.96	-5.81	13.59	4.51
feldspar	mass	=	1.11	(gm)	density	=	2.66	(gm/cc)	(analysis	in	mole	%)
	K0.01Na0.43Ca0.56Al1.56Si2.44O8
	G	=	-18385.6	(J)	H	=	-15370.5	(J)	S	=	2.49	(J/K)	V	=	0.42	(cc)	Cp	=	1.34	(J/K)
	albite	anorthite	sanidine
	43.09	55.53	1.38
spinel	mass	=	0.24	(gm)	density	=	4.78	(gm/cc)	(analysis	in	mole	%)
	Fe''1.15Mg0.12Fe'''1.19Al0.27Cr0.00Ti0.27O4
	G	=	-1891.29	(J)	H	=	-1308.42	(J)	S	=	0.48	(J/K)	V	=	0.05	(cc)	Cp	=	0.22	(J/K)
	chromite	hercynite	magnetite	spinel	ulvospinel
	0	0.98	59.41	12.4	27.21
apatite	mass	=	0.02	(gm)	density	=	3.06	(gm/cc)
	Ca5(PO4)3OH
	G	=	-299.23	(J)	H	=	-246.21	(J)	S	=	0.04	(J/K)	V	=	0.01	(cc)	Cp	=	0.02	(J/K)
Total	solids	mass	=	1.53	(gm)	density	=	2.94	(gm/cc)
	G	=	-22859.2	(J)	H	=	-18815.8	(J)	S	=	3.33	(J/K)	V	=	0.52	(cc)	Cp	=	1.76	(J/K)
Summary	of	all	fractionated	phases:	(total	mass	=	47.18	grams)
clinopyroxene	mass	=	30.3	(gm)	density	=	3.36	(gm/cc)	(analysis	in	mole	%)
	cpx	Na0.03Ca0.85Fe''0.23Mg0.68Fe'''0.09Ti0.09Al0.33Si1.72O6
	G	=	-458023	(J)	H	=	-380598	(J)	S	=	63.82	(J/K)	V	=	9.03	(cc)	Cp	=	34.33	(J/K)
	diopside	clinoenstatit	hedenbergite	alumino-buffo	buffonite	essenite	jadeite
	33.28	12.84	23	19.75	-2.23	10.8	2.56
clinopyroxene	mass	=	0.18	(gm)	density	=	3.51	(gm/cc)	(analysis	in	mole	%)
	cpx	Na0.03Ca0.93Fe''0.23Mg0.40Fe'''0.10Ti0.32Al0.69Si1.30O6
	G	=	-2679.96	(J)	H	=	-2229.17	(J)	S	=	0.37	(J/K)	V	=	0.05	(cc)	Cp	=	0.2	(J/K)
	diopside	clinoenstatit	hedenbergite	alumino-buffo	buffonite	essenite	jadeite
	-0.58	4.36	23.45	59.79	3.87	6.32	2.8
feldspar	mass	=	3.72	(gm)	density	=	2.67	(gm/cc)	(analysis	in	mole	%)
	K0.01Na0.39Ca0.60Al1.60Si2.40O8
	G	=	-61802.2	(J)	H	=	-51701.6	(J)	S	=	8.33	(J/K)	V	=	1.39	(cc)	Cp	=	4.49	(J/K)
	albite	anorthite	sanidine
	38.75	60.08	1.17
spinel	mass	=	12.03	(gm)	density	=	4.63	(gm/cc)	(analysis	in	mole	%)
	Fe''1.18Mg0.29Fe'''0.83Al0.24Cr0.00Ti0.47O4
	G	=	-102431	(J)	H	=	-73146.4	(J)	S	=	24.14	(J/K)	V	=	2.6	(cc)	Cp	=	11.19	(J/K)
	chromite	hercynite	magnetite	spinel	ulvospinel
	0	-16.92	41.32	29.04	46.57
apatite	mass	=	0.94	(gm)	density	=	3.06	(gm/cc)
	Ca5(PO4)3OH
	G	=	-13967.3	(J)	H	=	-11492.2	(J)	S	=	2.04	(J/K)	V	=	0.31	(cc)	Cp	=	1.07	(J/K)
Viscosity	of	the	System:	4.88	(log	10	poise)
System	mass	=	98.74	(gm)	density	=	2.82	(gm/cc)
	G	=	-1.47727e+06	(J)	H	=	-1.18355e+06	(J)	S	=	242.11	(J/K)	V	=	35.03	(cc)	Cp	=	124.26	(J/K)
Oxygen	delta	moles	=	0.0099161	delta	grams	=	0.317303
	G	=	-2712.3	(J)	H	=	299.64	(J)	S	=	2.48	(J/K)	V	=	1000.19	(cc)	Cp	=	0.35	(J/K)
**********----------**********
Title:	Dummy	Title
T	=	930	(C)	P	=	5	(kbars)	log(10)	f	O2	=	-11.57	delta	HM	=	-5.23	NNO	=	-0.21	QFM	=	0	COH	=	1.61	IW	=	4.26
Constraint	Flags:	fO2	path	=	QFM	Fractionate	Solids
Liquid	mass	=	48.47	(gm)	density	=	2.36	(gm/cc)	viscosity	=	3.55	(log	10	poise)	(analysis	in	wt	%)
	G	=	-790383	(J)	H	=	-627134	(J)	S	=	135.68	(J/K)	V	=	20.55	(cc)	Cp	=	68.96	(J/K)
	SiO2	TiO2	Al2O3	Fe2O3	Cr2O3	FeO	MnO	MgO	NiO	CoO	CaO	Na2O	K2O	P2O5	H2O	CO2	SO3	Cl2O-1	F2O-1
	58.28	0.35	18.61	0.85	0	3.47	0.52	0.64	0	0	3.65	4.91	2.57	0.61	5.53	0	0	0	0
orthopyroxene	mass	=	0.13	(gm)	density	=	3.48	(gm/cc)	(analysis	in	mole	%)
	opx	Na0.00Ca0.05Fe''0.79Mg1.06Fe'''0.03Ti0.00Al0.16Si1.90O6
	G	=	-1833.22	(J)	H	=	-1495.02	(J)	S	=	0.28	(J/K)	V	=	0.04	(cc)	Cp	=	0.15	(J/K)
	diopside	clinoenstatit	hedenbergite	alumino-buffo	buffonite	essenite	jadeite
	-84.24	94.98	79.33	6.86	-6.48	9.28	0.27
feldspar	mass	=	1.22	(gm)	density	=	2.66	(gm/cc)	(analysis	in	mole	%)
	K0.01Na0.45Ca0.54Al1.54Si2.46O8
	G	=	-20235.2	(J)	H	=	-16949.5	(J)	S	=	2.73	(J/K)	V	=	0.46	(cc)	Cp	=	1.47	(J/K)
	albite	anorthite	sanidine
	44.96	53.55	1.49
spinel	mass	=	0.21	(gm)	density	=	4.79	(gm/cc)	(analysis	in	mole	%)
	Fe''1.15Mg0.12Fe'''1.21Al0.26Cr0.00Ti0.27O4
	G	=	-1641.67	(J)	H	=	-1138.38	(J)	S	=	0.42	(J/K)	V	=	0.04	(cc)	Cp	=	0.2	(J/K)
	chromite	hercynite	magnetite	spinel	ulvospinel
	0	1.02	60.25	11.96	26.77
apatite	mass	=	0.02	(gm)	density	=	3.06	(gm/cc)
	Ca5(PO4)3OH
	G	=	-290.57	(J)	H	=	-239.65	(J)	S	=	0.04	(J/K)	V	=	0.01	(cc)	Cp	=	0.02	(J/K)
Total	solids	mass	=	1.59	(gm)	density	=	2.89	(gm/cc)
	G	=	-24000.7	(J)	H	=	-19822.6	(J)	S	=	3.47	(J/K)	V	=	0.55	(cc)	Cp	=	1.85	(J/K)
Summary	of	all	fractionated	phases:	(total	mass	=	48.69	grams)
clinopyroxene	mass	=	30.46	(gm)	density	=	3.36	(gm/cc)	(analysis	in	mole	%)
	cpx	Na0.03Ca0.85Fe''0.23Mg0.68Fe'''0.09Ti0.09Al0.33Si1.72O6
	G	=	-459633	(J)	H	=	-382806	(J)	S	=	63.85	(J/K)	V	=	9.07	(cc)	Cp	=	34.47	(J/K)
	diopside	clinoenstatit	hedenbergite	alumino-buffo	buffonite	essenite	jadeite
	33.24	12.85	23.05	19.72	-2.24	10.81	2.57
clinopyroxene	mass	=	0.18	(gm)	density	=	3.51	(gm/cc)	(analysis	in	mole	%)
	cpx	Na0.03Ca0.93Fe''0.23Mg0.40Fe'''0.10Ti0.32Al0.69Si1.30O6
	G	=	-2676.25	(J)	H	=	-2231.16	(J)	S	=	0.37	(J/K)	V	=	0.05	(cc)	Cp	=	0.2	(J/K)
	diopside	clinoenstatit	hedenbergite	alumino-buffo	buffonite	essenite	jadeite
	-0.58	4.36	23.45	59.79	3.87	6.32	2.8
feldspar	mass	=	4.82	(gm)	density	=	2.67	(gm/cc)	(analysis	in	mole	%)
	K0.01Na0.40Ca0.59Al1.59Si2.41O8
	G	=	-80035	(J)	H	=	-67092.6	(J)	S	=	10.76	(J/K)	V	=	1.81	(cc)	Cp	=	5.82	(J/K)
	albite	anorthite	sanidine
	39.75	59.04	1.22
spinel	mass	=	12.28	(gm)	density	=	4.63	(gm/cc)	(analysis	in	mole	%)
	Fe''1.17Mg0.29Fe'''0.83Al0.24Cr0.00Ti0.46O4
	G	=	-104061	(J)	H	=	-74555.9	(J)	S	=	24.52	(J/K)	V	=	2.65	(cc)	Cp	=	11.4	(J/K)
	chromite	hercynite	magnetite	spinel	ulvospinel
	0	-16.58	41.66	28.72	46.2
apatite	mass	=	0.95	(gm)	density	=	3.06	(gm/cc)
	Ca5(PO4)3OH
	G	=	-14171.1	(J)	H	=	-11687.8	(J)	S	=	2.06	(J/K)	V	=	0.31	(cc)	Cp	=	1.09	(J/K)
Viscosity	of	the	System:	5.06	(log	10	poise)
System	mass	=	98.75	(gm)	density	=	2.82	(gm/cc)
	G	=	-1.47496e+06	(J)	H	=	-1.18533e+06	(J)	S	=	240.73	(J/K)	V	=	34.98	(cc)	Cp	=	123.78	(J/K)
Oxygen	delta	moles	=	0.0101085	delta	grams	=	0.32346
	G	=	-2739.63	(J)	H	=	301.85	(J)	S	=	2.53	(J/K)	V	=	1011.19	(cc)	Cp	=	0.36	(J/K)
**********----------**********
Title:	Dummy	Title
T	=	920	(C)	P	=	5	(kbars)	log(10)	f	O2	=	-11.73	delta	HM	=	-5.23	NNO	=	-0.2	QFM	=	0	COH	=	1.59	IW	=	4.29
Constraint	Flags:	fO2	path	=	QFM	Fractionate	Solids
Liquid	mass	=	46.93	(gm)	density	=	2.35	(gm/cc)	viscosity	=	3.58	(log	10	poise)	(analysis	in	wt	%)
	G	=	-765671	(J)	H	=	-608909	(J)	S	=	131.39	(J/K)	V	=	19.96	(cc)	Cp	=	66.74	(J/K)
	SiO2	TiO2	Al2O3	Fe2O3	Cr2O3	FeO	MnO	MgO	NiO	CoO	CaO	Na2O	K2O	P2O5	H2O	CO2	SO3	Cl2O-1	F2O-1
	58.62	0.32	18.47	0.81	0	3.25	0.53	0.58	0	0	3.48	4.94	2.65	0.62	5.72	0	0	0	0
orthopyroxene	mass	=	0.18	(gm)	density	=	3.48	(gm/cc)	(analysis	in	mole	%)
	opx	Na0.00Ca0.04Fe''0.81Mg1.04Fe'''0.03Ti0.00Al0.16Si1.90O6
	G	=	-2454.91	(J)	H	=	-2005.78	(J)	S	=	0.38	(J/K)	V	=	0.05	(cc)	Cp	=	0.21	(J/K)
	diopside	clinoenstatit	hedenbergite	alumino-buffo	buffonite	essenite	jadeite
	-86.35	95.26	81.18	6.87	-6.52	9.29	0.27
feldspar	mass	=	1.18	(gm)	density	=	2.65	(gm/cc)	(analysis	in	mole	%)
	K0.02Na0.47Ca0.52Al1.52Si2.48O8
	G	=	-19525.1	(J)	H	=	-16386.4	(J)	S	=	2.63	(J/K)	V	=	0.44	(cc)	Cp	=	1.42	(J/K)
	albite	anorthite	sanidine
	46.83	51.56	1.61
spinel	mass	=	0.18	(gm)	density	=	4.8	(gm/cc)	(analysis	in	mole	%)
	Fe''1.15Mg0.11Fe'''1.22Al0.25Cr0.00Ti0.26O4
	G	=	-1367.49	(J)	H	=	-950.31	(J)	S	=	0.35	(J/K)	V	=	0.04	(cc)	Cp	=	0.16	(J/K)
	chromite	hercynite	magnetite	spinel	ulvospinel
	0	1.18	60.98	11.34	26.5
apatite	mass	=	0.02	(gm)	density	=	3.06	(gm/cc)
	Ca5(PO4)3OH
	G	=	-262.28	(J)	H	=	-216.83	(J)	S	=	0.04	(J/K)	V	=	0.01	(cc)	Cp	=	0.02	(J/K)
Total	solids	mass	=	1.55	(gm)	density	=	2.89	(gm/cc)
	G	=	-23609.8	(J)	H	=	-19559.3	(J)	S	=	3.39	(J/K)	V	=	0.54	(cc)	Cp	=	1.82	(J/K)
Summary	of	all	fractionated	phases:	(total	mass	=	50.26	grams)
orthopyroxene	mass	=	0.13	(gm)	density	=	3.48	(gm/cc)	(analysis	in	mole	%)
	opx	Na0.00Ca0.05Fe''0.79Mg1.06Fe'''0.03Ti0.00Al0.16Si1.90O6
	G	=	-1798.97	(J)	H	=	-1470.84	(J)	S	=	0.28	(J/K)	V	=	0.04	(cc)	Cp	=	0.15	(J/K)
	diopside	clinoenstatit	hedenbergite	alumino-buffo	buffonite	essenite	jadeite
	-84.24	94.98	79.33	6.86	-6.48	9.28	0.27
clinopyroxene	mass	=	30.46	(gm)	density	=	3.36	(gm/cc)	(analysis	in	mole	%)
	cpx	Na0.03Ca0.85Fe''0.23Mg0.68Fe'''0.09Ti0.09Al0.33Si1.72O6
	G	=	-458996	(J)	H	=	-383150	(J)	S	=	63.57	(J/K)	V	=	9.06	(cc)	Cp	=	34.43	(J/K)
	diopside	clinoenstatit	hedenbergite	alumino-buffo	buffonite	essenite	jadeite
	33.24	12.85	23.05	19.72	-2.24	10.81	2.57
clinopyroxene	mass	=	0.18	(gm)	density	=	3.51	(gm/cc)	(analysis	in	mole	%)
	cpx	Na0.03Ca0.93Fe''0.23Mg0.40Fe'''0.10Ti0.32Al0.69Si1.30O6
	G	=	-2672.56	(J)	H	=	-2233.14	(J)	S	=	0.37	(J/K)	V	=	0.05	(cc)	Cp	=	0.2	(J/K)
	diopside	clinoenstatit	hedenbergite	alumino-buffo	buffonite	essenite	jadeite
	-0.58	4.36	23.45	59.79	3.87	6.32	2.8
feldspar	mass	=	6.04	(gm)	density	=	2.66	(gm/cc)	(analysis	in	mole	%)
	K0.01Na0.41Ca0.58Al1.58Si2.42O8
	G	=	-100091	(J)	H	=	-84077.3	(J)	S	=	13.42	(J/K)	V	=	2.27	(cc)	Cp	=	7.28	(J/K)
	albite	anorthite	sanidine
	40.8	57.93	1.27
spinel	mass	=	12.49	(gm)	density	=	4.63	(gm/cc)	(analysis	in	mole	%)
	Fe''1.17Mg0.28Fe'''0.84Al0.24Cr0.00Ti0.46O4
	G	=	-105438	(J)	H	=	-75797.4	(J)	S	=	24.84	(J/K)	V	=	2.69	(cc)	Cp	=	11.58	(J/K)
	chromite	hercynite	magnetite	spinel	ulvospinel
	0	-16.29	41.97	28.44	45.88
apatite	mass	=	0.97	(gm)	density	=	3.06	(gm/cc)
	Ca5(PO4)3OH
	G	=	-14366.2	(J)	H	=	-11877	(J)	S	=	2.09	(J/K)	V	=	0.32	(cc)	Cp	=	1.1	(J/K)
Viscosity	of	the	System:	5.27	(log	10	poise)
System	mass	=	98.75	(gm)	density	=	2.83	(gm/cc)
	G	=	-1.47264e+06	(J)	H	=	-1.18707e+06	(J)	S	=	239.34	(J/K)	V	=	34.93	(cc)	Cp	=	123.3	(J/K)
Oxygen	delta	moles	=	0.0102629	delta	grams	=	0.328401
	G	=	-2755.83	(J)	H	=	302.81	(J)	S	=	2.56	(J/K)	V	=	1018.1	(cc)	Cp	=	0.37	(J/K)
**********----------**********
Title:	Dummy	Title
T	=	910	(C)	P	=	5	(kbars)	log(10)	f	O2	=	-11.9	delta	HM	=	-5.23	NNO	=	-0.19	QFM	=	0	COH	=	1.58	IW	=	4.31
Constraint	Flags:	fO2	path	=	QFM	Fractionate	Solids
Liquid	mass	=	45.48	(gm)	density	=	2.34	(gm/cc)	viscosity	=	3.61	(log	10	poise)	(analysis	in	wt	%)
	G	=	-742313	(J)	H	=	-591668	(J)	S	=	127.33	(J/K)	V	=	19.41	(cc)	Cp	=	64.65	(J/K)
	SiO2	TiO2	Al2O3	Fe2O3	Cr2O3	FeO	MnO	MgO	NiO	CoO	CaO	Na2O	K2O	P2O5	H2O	CO2	SO3	Cl2O-1	F2O-1
	58.94	0.3	18.33	0.77	0	3.04	0.55	0.53	0	0	3.32	4.96	2.73	0.63	5.9	0	0	0	0
orthopyroxene	mass	=	0.16	(gm)	density	=	3.49	(gm/cc)	(analysis	in	mole	%)
	opx	Na0.00Ca0.04Fe''0.83Mg1.03Fe'''0.03Ti0.00Al0.16Si1.90O6
	G	=	-2193.4	(J)	H	=	-1795.47	(J)	S	=	0.34	(J/K)	V	=	0.05	(cc)	Cp	=	0.19	(J/K)
	diopside	clinoenstatit	hedenbergite	alumino-buffo	buffonite	essenite	jadeite
	-88.51	95.54	83.07	6.89	-6.56	9.3	0.27
feldspar	mass	=	1.13	(gm)	density	=	2.65	(gm/cc)	(analysis	in	mole	%)
	K0.02Na0.49Ca0.50Al1.50Si2.50O8
	G	=	-18664.5	(J)	H	=	-15694.5	(J)	S	=	2.51	(J/K)	V	=	0.43	(cc)	Cp	=	1.36	(J/K)
	albite	anorthite	sanidine
	48.71	49.55	1.74
spinel	mass	=	0.16	(gm)	density	=	4.81	(gm/cc)	(analysis	in	mole	%)
	Fe''1.15Mg0.11Fe'''1.23Al0.24Cr0.00Ti0.26O4
	G	=	-1220.28	(J)	H	=	-849.95	(J)	S	=	0.31	(J/K)	V	=	0.03	(cc)	Cp	=	0.15	(J/K)
	chromite	hercynite	magnetite	spinel	ulvospinel
	0	1.33	61.7	10.75	26.22
apatite	mass	=	0.01	(gm)	density	=	3.06	(gm/cc)
	Ca5(PO4)3OH
	G	=	-212.31	(J)	H	=	-175.94	(J)	S	=	0.03	(J/K)	V	=	0	(cc)	Cp	=	0.02	(J/K)
Total	solids	mass	=	1.47	(gm)	density	=	2.87	(gm/cc)
	G	=	-22290.5	(J)	H	=	-18515.8	(J)	S	=	3.19	(J/K)	V	=	0.51	(cc)	Cp	=	1.71	(J/K)
Summary	of	all	fractionated	phases:	(total	mass	=	51.81	grams)
orthopyroxene	mass	=	0.31	(gm)	density	=	3.48	(gm/cc)	(analysis	in	mole	%)
	opx	Na0.00Ca0.05Fe''0.80Mg1.05Fe'''0.03Ti0.00Al0.16Si1.90O6
	G	=	-4216.03	(J)	H	=	-3454.53	(J)	S	=	0.64	(J/K)	V	=	0.09	(cc)	Cp	=	0.36	(J/K)
	diopside	clinoenstatit	hedenbergite	alumino-buffo	buffonite	essenite	jadeite
	-85.46	95.14	80.4	6.87	-6.5	9.28	0.27
clinopyroxene	mass	=	30.46	(gm)	density	=	3.36	(gm/cc)	(analysis	in	mole	%)
	cpx	Na0.03Ca0.85Fe''0.23Mg0.68Fe'''0.09Ti0.09Al0.33Si1.72O6
	G	=	-458361	(J)	H	=	-383494	(J)	S	=	63.28	(J/K)	V	=	9.06	(cc)	Cp	=	34.4	(J/K)
	diopside	clinoenstatit	hedenbergite	alumino-buffo	buffonite	essenite	jadeite
	33.24	12.85	23.05	19.72	-2.24	10.81	2.57
clinopyroxene	mass	=	0.18	(gm)	density	=	3.51	(gm/cc)	(analysis	in	mole	%)
	cpx	Na0.03Ca0.93Fe''0.23Mg0.40Fe'''0.10Ti0.32Al0.69Si1.30O6
	G	=	-2668.88	(J)	H	=	-2235.13	(J)	S	=	0.37	(J/K)	V	=	0.05	(cc)	Cp	=	0.2	(J/K)
	diopside	clinoenstatit	hedenbergite	alumino-buffo	buffonite	essenite	jadeite
	-0.58	4.36	23.45	59.79	3.87	6.32	2.8
feldspar	mass	=	7.22	(gm)	density	=	2.66	(gm/cc)	(analysis	in	mole	%)
	K0.01Na0.42Ca0.57Al1.57Si2.43O8
	G	=	-119411	(J)	H	=	-100513	(J)	S	=	15.97	(J/K)	V	=	2.71	(cc)	Cp	=	8.69	(J/K)
	albite	anorthite	sanidine
	41.79	56.89	1.33
spinel	mass	=	12.66	(gm)	density	=	4.64	(gm/cc)	(analysis	in	mole	%)
	Fe''1.17Mg0.28Fe'''0.84Al0.24Cr0.00Ti0.46O4
	G	=	-106538	(J)	H	=	-76852.6	(J)	S	=	25.09	(J/K)	V	=	2.73	(cc)	Cp	=	11.73	(J/K)
	chromite	hercynite	magnetite	spinel	ulvospinel
	0	-16.05	42.23	28.21	45.61
apatite	mass	=	0.98	(gm)	density	=	3.06	(gm/cc)
	Ca5(PO4)3OH
	G	=	-14533	(J)	H	=	-12043.5	(J)	S	=	2.1	(J/K)	V	=	0.32	(cc)	Cp	=	1.12	(J/K)
Viscosity	of	the	System:	5.51	(log	10	poise)
System	mass	=	98.75	(gm)	density	=	2.83	(gm/cc)
	G	=	-1.47033e+06	(J)	H	=	-1.18878e+06	(J)	S	=	237.97	(J/K)	V	=	34.88	(cc)	Cp	=	122.85	(J/K)
Oxygen	delta	moles	=	0.0104018	delta	grams	=	0.332845
	G	=	-2767.16	(J)	H	=	303.2	(J)	S	=	2.6	(J/K)	V	=	1023.23	(cc)	Cp	=	0.37	(J/K)
**********----------**********
Title:	Dummy	Title
T	=	900	(C)	P	=	5	(kbars)	log(10)	f	O2	=	-12.08	delta	HM	=	-5.23	NNO	=	-0.19	QFM	=	0	COH	=	1.56	IW	=	4.33
Constraint	Flags:	fO2	path	=	QFM	Fractionate	Solids
Liquid	mass	=	44.11	(gm)	density	=	2.34	(gm/cc)	viscosity	=	3.64	(log	10	poise)	(analysis	in	wt	%)
	G	=	-720163	(J)	H	=	-575303	(J)	S	=	123.48	(J/K)	V	=	18.89	(cc)	Cp	=	62.68	(J/K)
	SiO2	TiO2	Al2O3	Fe2O3	Cr2O3	FeO	MnO	MgO	NiO	CoO	CaO	Na2O	K2O	P2O5	H2O	CO2	SO3	Cl2O-1	F2O-1
	59.23	0.28	18.19	0.74	0	2.84	0.57	0.49	0	0	3.17	4.97	2.8	0.65	6.08	0	0	0	0
orthopyroxene	mass	=	0.14	(gm)	density	=	3.5	(gm/cc)	(analysis	in	mole	%)
	opx	Na0.00Ca0.04Fe''0.85Mg1.01Fe'''0.03Ti0.00Al0.17Si1.90O6
	G	=	-1965.52	(J)	H	=	-1611.95	(J)	S	=	0.3	(J/K)	V	=	0.04	(cc)	Cp	=	0.17	(J/K)
	diopside	clinoenstatit	hedenbergite	alumino-buffo	buffonite	essenite	jadeite
	-90.72	95.83	84.99	6.93	-6.62	9.33	0.26
feldspar	mass	=	1.08	(gm)	density	=	2.65	(gm/cc)	(analysis	in	mole	%)
	K0.02Na0.51Ca0.48Al1.48Si2.52O8
	G	=	-17893.6	(J)	H	=	-15075.4	(J)	S	=	2.4	(J/K)	V	=	0.41	(cc)	Cp	=	1.31	(J/K)
	albite	anorthite	sanidine
	50.59	47.52	1.89
spinel	mass	=	0.15	(gm)	density	=	4.82	(gm/cc)	(analysis	in	mole	%)
	Fe''1.16Mg0.10Fe'''1.25Al0.23Cr0.00Ti0.26O4
	G	=	-1090.96	(J)	H	=	-761.69	(J)	S	=	0.28	(J/K)	V	=	0.03	(cc)	Cp	=	0.13	(J/K)
	chromite	hercynite	magnetite	spinel	ulvospinel
	0	1.48	62.4	10.19	25.93
apatite	mass	=	0.01	(gm)	density	=	3.06	(gm/cc)
	Ca5(PO4)3OH
	G	=	-164.11	(J)	H	=	-136.32	(J)	S	=	0.02	(J/K)	V	=	0	(cc)	Cp	=	0.01	(J/K)
Total	solids	mass	=	1.39	(gm)	density	=	2.86	(gm/cc)
	G	=	-21114.2	(J)	H	=	-17585.3	(J)	S	=	3.01	(J/K)	V	=	0.48	(cc)	Cp	=	1.62	(J/K)
Summary	of	all	fractionated	phases:	(total	mass	=	53.26	grams)
orthopyroxene	mass	=	0.46	(gm)	density	=	3.49	(gm/cc)	(analysis	in	mole	%)
	opx	Na0.00Ca0.04Fe''0.81Mg1.04Fe'''0.03Ti0.00Al0.16Si1.90O6
	G	=	-6368.42	(J)	H	=	-5229.77	(J)	S	=	0.97	(J/K)	V	=	0.13	(cc)	Cp	=	0.54	(J/K)
	diopside	clinoenstatit	hedenbergite	alumino-buffo	buffonite	essenite	jadeite
	-86.5	95.28	81.3	6.88	-6.52	9.29	0.27
clinopyroxene	mass	=	30.46	(gm)	density	=	3.36	(gm/cc)	(analysis	in	mole	%)
	cpx	Na0.03Ca0.85Fe''0.23Mg0.68Fe'''0.09Ti0.09Al0.33Si1.72O6
	G	=	-457730	(J)	H	=	-383838	(J)	S	=	62.99	(J/K)	V	=	9.06	(cc)	Cp	=	34.36	(J/K)
	diopside	clinoenstatit	hedenbergite	alumino-buffo	buffonite	essenite	jadeite
	33.24	12.85	23.05	19.72	-2.24	10.81	2.57
clinopyroxene	mass	=	0.18	(gm)	density	=	3.51	(gm/cc)	(analysis	in	mole	%)
	cpx	Na0.03Ca0.93Fe''0.23Mg0.40Fe'''0.10Ti0.32Al0.69Si1.30O6
	G	=	-2665.23	(J)	H	=	-2237.12	(J)	S	=	0.36	(J/K)	V	=	0.05	(cc)	Cp	=	0.2	(J/K)
	diopside	clinoenstatit	hedenbergite	alumino-buffo	buffonite	essenite	jadeite
	-0.58	4.36	23.45	59.79	3.87	6.32	2.8
feldspar	mass	=	8.34	(gm)	density	=	2.66	(gm/cc)	(analysis	in	mole	%)
	K0.01Na0.43Ca0.56Al1.56Si2.44O8
	G	=	-137847	(J)	H	=	-116270	(J)	S	=	18.39	(J/K)	V	=	3.13	(cc)	Cp	=	10.04	(J/K)
	albite	anorthite	sanidine
	42.72	55.89	1.38
spinel	mass	=	12.82	(gm)	density	=	4.64	(gm/cc)	(analysis	in	mole	%)
	Fe''1.17Mg0.28Fe'''0.85Al0.24Cr0.00Ti0.45O4
	G	=	-107489	(J)	H	=	-77808.8	(J)	S	=	25.3	(J/K)	V	=	2.76	(cc)	Cp	=	11.86	(J/K)
	chromite	hercynite	magnetite	spinel	ulvospinel
	0	-15.84	42.46	28	45.38
apatite	mass	=	0.99	(gm)	density	=	3.06	(gm/cc)
	Ca5(PO4)3OH
	G	=	-14649.8	(J)	H	=	-12169.1	(J)	S	=	2.11	(J/K)	V	=	0.32	(cc)	Cp	=	1.12	(J/K)
Viscosity	of	the	System:	5.79	(log	10	poise)
System	mass	=	98.76	(gm)	density	=	2.84	(gm/cc)
	G	=	-1.46803e+06	(J)	H	=	-1.19044e+06	(J)	S	=	236.62	(J/K)	V	=	34.83	(cc)	Cp	=	122.42	(J/K)
Oxygen	delta	moles	=	0.0105268	delta	grams	=	0.336846
	G	=	-2774.17	(J)	H	=	303.11	(J)	S	=	2.62	(J/K)	V	=	1026.78	(cc)	Cp	=	0.37	(J/K)
**********----------**********
Title:	Dummy	Title
T	=	890	(C)	P	=	5	(kbars)	log(10)	f	O2	=	-12.25	delta	HM	=	-5.23	NNO	=	-0.18	QFM	=	0	COH	=	1.54	IW	=	4.35
Constraint	Flags:	fO2	path	=	QFM	Fractionate	Solids
Liquid	mass	=	42.85	(gm)	density	=	2.33	(gm/cc)	viscosity	=	3.67	(log	10	poise)	(analysis	in	wt	%)
	G	=	-699688	(J)	H	=	-560207	(J)	S	=	119.92	(J/K)	V	=	18.4	(cc)	Cp	=	60.85	(J/K)
	SiO2	TiO2	Al2O3	Fe2O3	Cr2O3	FeO	MnO	MgO	NiO	CoO	CaO	Na2O	K2O	P2O5	H2O	CO2	SO3	Cl2O-1	F2O-1
	59.54	0.26	18.01	0.7	0	2.65	0.58	0.44	0	0	3.03	4.99	2.88	0.66	6.26	0	0	0	0
garnet	mass	=	0.22	(gm)	density	=	3.89	(gm/cc)	(analysis	in	mole	%)
	(Ca0.16Fe''0.54Mg0.30)3Al2Si3O12
	G	=	-3122.02	(J)	H	=	-2597.81	(J)	S	=	0.45	(J/K)	V	=	0.06	(cc)	Cp	=	0.25	(J/K)
	almandine	grossular	pyrope
	53.78	16.33	29.89
orthopyroxene	mass	=	0.03	(gm)	density	=	3.51	(gm/cc)	(analysis	in	mole	%)
	opx	Na0.00Ca0.04Fe''0.87Mg1.00Fe'''0.03Ti0.00Al0.16Si1.90O6
	G	=	-391.06	(J)	H	=	-321.35	(J)	S	=	0.06	(J/K)	V	=	0.01	(cc)	Cp	=	0.03	(J/K)
	diopside	clinoenstatit	hedenbergite	alumino-buffo	buffonite	essenite	jadeite
	-92.65	96.1	86.69	6.93	-6.63	9.3	0.26
feldspar	mass	=	0.91	(gm)	density	=	2.64	(gm/cc)	(analysis	in	mole	%)
	K0.02Na0.53Ca0.45Al1.45Si2.55O8
	G	=	-15048.7	(J)	H	=	-12702.9	(J)	S	=	2.02	(J/K)	V	=	0.35	(cc)	Cp	=	1.1	(J/K)
	albite	anorthite	sanidine
	52.61	45.34	2.05
spinel	mass	=	0.1	(gm)	density	=	4.83	(gm/cc)	(analysis	in	mole	%)
	Fe''1.16Mg0.10Fe'''1.25Al0.22Cr0.00Ti0.26O4
	G	=	-768.69	(J)	H	=	-538.12	(J)	S	=	0.2	(J/K)	V	=	0.02	(cc)	Cp	=	0.09	(J/K)
	chromite	hercynite	magnetite	spinel	ulvospinel
	0	1.42	62.7	9.72	26.16
apatite	mass	=	0.01	(gm)	density	=	3.06	(gm/cc)
	Ca5(PO4)3OH
	G	=	-114.58	(J)	H	=	-95.41	(J)	S	=	0.02	(J/K)	V	=	0	(cc)	Cp	=	0.01	(J/K)
Total	solids	mass	=	1.28	(gm)	density	=	2.94	(gm/cc)
	G	=	-19445.1	(J)	H	=	-16255.5	(J)	S	=	2.74	(J/K)	V	=	0.44	(cc)	Cp	=	1.48	(J/K)
Summary	of	all	fractionated	phases:	(total	mass	=	54.63	grams)
orthopyroxene	mass	=	0.61	(gm)	density	=	3.49	(gm/cc)	(analysis	in	mole	%)
	opx	Na0.00Ca0.04Fe''0.82Mg1.04Fe'''0.03Ti0.00Al0.16Si1.90O6
	G	=	-8290.13	(J)	H	=	-6823.17	(J)	S	=	1.26	(J/K)	V	=	0.17	(cc)	Cp	=	0.7	(J/K)
	diopside	clinoenstatit	hedenbergite	alumino-buffo	buffonite	essenite	jadeite
	-87.48	95.41	82.17	6.89	-6.54	9.3	0.27
clinopyroxene	mass	=	30.46	(gm)	density	=	3.36	(gm/cc)	(analysis	in	mole	%)
	cpx	Na0.03Ca0.85Fe''0.23Mg0.68Fe'''0.09Ti0.09Al0.33Si1.72O6
	G	=	-457102	(J)	H	=	-384182	(J)	S	=	62.69	(J/K)	V	=	9.05	(cc)	Cp	=	34.33	(J/K)
	diopside	clinoenstatit	hedenbergite	alumino-buffo	buffonite	essenite	jadeite
	33.24	12.85	23.05	19.72	-2.24	10.81	2.57
clinopyroxene	mass	=	0.18	(gm)	density	=	3.52	(gm/cc)	(analysis	in	mole	%)
	cpx	Na0.03Ca0.93Fe''0.23Mg0.40Fe'''0.10Ti0.32Al0.69Si1.30O6
	G	=	-2661.59	(J)	H	=	-2239.1	(J)	S	=	0.36	(J/K)	V	=	0.05	(cc)	Cp	=	0.2	(J/K)
	diopside	clinoenstatit	hedenbergite	alumino-buffo	buffonite	essenite	jadeite
	-0.58	4.36	23.45	59.79	3.87	6.32	2.8
feldspar	mass	=	9.43	(gm)	density	=	2.66	(gm/cc)	(analysis	in	mole	%)
	K0.01Na0.44Ca0.55Al1.55Si2.45O8
	G	=	-155489	(J)	H	=	-131421	(J)	S	=	20.69	(J/K)	V	=	3.54	(cc)	Cp	=	11.34	(J/K)
	albite	anorthite	sanidine
	43.63	54.93	1.44
spinel	mass	=	12.97	(gm)	density	=	4.64	(gm/cc)	(analysis	in	mole	%)
	Fe''1.17Mg0.28Fe'''0.85Al0.24Cr0.00Ti0.45O4
	G	=	-108309	(J)	H	=	-78678	(J)	S	=	25.48	(J/K)	V	=	2.79	(cc)	Cp	=	11.98	(J/K)
	chromite	hercynite	magnetite	spinel	ulvospinel
	0	-15.66	42.68	27.81	45.17
apatite	mass	=	1	(gm)	density	=	3.06	(gm/cc)
	Ca5(PO4)3OH
	G	=	-14718.4	(J)	H	=	-12255	(J)	S	=	2.12	(J/K)	V	=	0.33	(cc)	Cp	=	1.13	(J/K)
Viscosity	of	the	System:	6.14	(log	10	poise)
System	mass	=	98.76	(gm)	density	=	2.84	(gm/cc)
	G	=	-1.4657e+06	(J)	H	=	-1.19206e+06	(J)	S	=	235.26	(J/K)	V	=	34.78	(cc)	Cp	=	122.01	(J/K)
Oxygen	delta	moles	=	0.0105925	delta	grams	=	0.338946
	G	=	-2765.09	(J)	H	=	301.24	(J)	S	=	2.64	(J/K)	V	=	1024.37	(cc)	Cp	=	0.38	(J/K)
**********----------**********
Title:	Dummy	Title
T	=	880	(C)	P	=	5	(kbars)	log(10)	f	O2	=	-12.43	delta	HM	=	-5.23	NNO	=	-0.17	QFM	=	0	COH	=	1.52	IW	=	4.37
Constraint	Flags:	fO2	path	=	QFM	Fractionate	Solids
Liquid	mass	=	41.64	(gm)	density	=	2.32	(gm/cc)	viscosity	=	3.69	(log	10	poise)	(analysis	in	wt	%)
	G	=	-680094	(J)	H	=	-545736	(J)	S	=	116.51	(J/K)	V	=	17.94	(cc)	Cp	=	59.11	(J/K)
	SiO2	TiO2	Al2O3	Fe2O3	Cr2O3	FeO	MnO	MgO	NiO	CoO	CaO	Na2O	K2O	P2O5	H2O	CO2	SO3	Cl2O-1	F2O-1
	59.84	0.25	17.82	0.66	0	2.45	0.6	0.4	0	0	2.9	5.01	2.95	0.68	6.44	0	0	0	0
garnet	mass	=	0.31	(gm)	density	=	3.9	(gm/cc)	(analysis	in	mole	%)
	(Ca0.16Fe''0.55Mg0.29)3Al2Si3O12
	G	=	-4237.81	(J)	H	=	-3532.99	(J)	S	=	0.61	(J/K)	V	=	0.08	(cc)	Cp	=	0.34	(J/K)
	almandine	grossular	pyrope
	54.79	16.01	29.21
feldspar	mass	=	0.84	(gm)	density	=	2.64	(gm/cc)	(analysis	in	mole	%)
	K0.02Na0.55Ca0.43Al1.43Si2.57O8
	G	=	-13776.3	(J)	H	=	-11651	(J)	S	=	1.84	(J/K)	V	=	0.32	(cc)	Cp	=	1.01	(J/K)
	albite	anorthite	sanidine
	54.67	43.09	2.24
spinel	mass	=	0.08	(gm)	density	=	4.84	(gm/cc)	(analysis	in	mole	%)
	Fe''1.18Mg0.09Fe'''1.25Al0.21Cr0.00Ti0.27O4
	G	=	-558.53	(J)	H	=	-392.11	(J)	S	=	0.14	(J/K)	V	=	0.02	(cc)	Cp	=	0.07	(J/K)
	chromite	hercynite	magnetite	spinel	ulvospinel
	0	1.33	62.71	9.22	26.74
apatite	mass	=	0	(gm)	density	=	3.06	(gm/cc)
	Ca5(PO4)3OH
	G	=	-72.39	(J)	H	=	-60.42	(J)	S	=	0.01	(J/K)	V	=	0	(cc)	Cp	=	0.01	(J/K)
Total	solids	mass	=	1.22	(gm)	density	=	2.96	(gm/cc)
	G	=	-18645	(J)	H	=	-15636.5	(J)	S	=	2.61	(J/K)	V	=	0.41	(cc)	Cp	=	1.42	(J/K)
Summary	of	all	fractionated	phases:	(total	mass	=	55.89	grams)
garnet	mass	=	0.22	(gm)	density	=	3.89	(gm/cc)	(analysis	in	mole	%)
	(Ca0.16Fe''0.54Mg0.30)3Al2Si3O12
	G	=	-3053.46	(J)	H	=	-2546.83	(J)	S	=	0.44	(J/K)	V	=	0.06	(cc)	Cp	=	0.24	(J/K)
	almandine	grossular	pyrope
	53.78	16.33	29.89
orthopyroxene	mass	=	0.63	(gm)	density	=	3.49	(gm/cc)	(analysis	in	mole	%)
	opx	Na0.00Ca0.04Fe''0.82Mg1.03Fe'''0.03Ti0.00Al0.16Si1.90O6
	G	=	-8637	(J)	H	=	-7126.29	(J)	S	=	1.31	(J/K)	V	=	0.18	(cc)	Cp	=	0.73	(J/K)
	diopside	clinoenstatit	hedenbergite	alumino-buffo	buffonite	essenite	jadeite
	-87.7	95.44	82.35	6.89	-6.55	9.3	0.27
clinopyroxene	mass	=	30.46	(gm)	density	=	3.37	(gm/cc)	(analysis	in	mole	%)
	cpx	Na0.03Ca0.85Fe''0.23Mg0.68Fe'''0.09Ti0.09Al0.33Si1.72O6
	G	=	-456476	(J)	H	=	-384525	(J)	S	=	62.4	(J/K)	V	=	9.05	(cc)	Cp	=	34.29	(J/K)
	diopside	clinoenstatit	hedenbergite	alumino-buffo	buffonite	essenite	jadeite
	33.24	12.85	23.05	19.72	-2.24	10.81	2.57
clinopyroxene	mass	=	0.18	(gm)	density	=	3.52	(gm/cc)	(analysis	in	mole	%)
	cpx	Na0.03Ca0.93Fe''0.23Mg0.40Fe'''0.10Ti0.32Al0.69Si1.30O6
	G	=	-2657.96	(J)	H	=	-2241.08	(J)	S	=	0.36	(J/K)	V	=	0.05	(cc)	Cp	=	0.2	(J/K)
	diopside	clinoenstatit	hedenbergite	alumino-buffo	buffonite	essenite	jadeite
	-0.58	4.36	23.45	59.79	3.87	6.32	2.8
feldspar	mass	=	10.33	(gm)	density	=	2.66	(gm/cc)	(analysis	in	mole	%)
	K0.01Na0.44Ca0.54Al1.54Si2.46O8
	G	=	-170267	(J)	H	=	-144211	(J)	S	=	22.6	(J/K)	V	=	3.88	(cc)	Cp	=	12.42	(J/K)
	albite	anorthite	sanidine
	44.43	54.08	1.5
spinel	mass	=	13.07	(gm)	density	=	4.65	(gm/cc)	(analysis	in	mole	%)
	Fe''1.17Mg0.28Fe'''0.86Al0.24Cr0.00Ti0.45O4
	G	=	-108806	(J)	H	=	-79324.7	(J)	S	=	25.57	(J/K)	V	=	2.81	(cc)	Cp	=	12.06	(J/K)
	chromite	hercynite	magnetite	spinel	ulvospinel
	0	-15.53	42.83	27.67	45.03
apatite	mass	=	1	(gm)	density	=	3.06	(gm/cc)
	Ca5(PO4)3OH
	G	=	-14737.7	(J)	H	=	-12300	(J)	S	=	2.11	(J/K)	V	=	0.33	(cc)	Cp	=	1.13	(J/K)
Viscosity	of	the	System:	6.64	(log	10	poise)
System	mass	=	98.76	(gm)	density	=	2.84	(gm/cc)
	G	=	-1.46337e+06	(J)	H	=	-1.19365e+06	(J)	S	=	233.9	(J/K)	V	=	34.72	(cc)	Cp	=	121.6	(J/K)
Oxygen	delta	moles	=	0.0106214	delta	grams	=	0.339872
	G	=	-2746.22	(J)	H	=	298.29	(J)	S	=	2.64	(J/K)	V	=	1018.34	(cc)	Cp	=	0.38	(J/K)
**********----------**********
Title:	Dummy	Title
T	=	870	(C)	P	=	5	(kbars)	log(10)	f	O2	=	-12.61	delta	HM	=	-5.23	NNO	=	-0.16	QFM	=	0	COH	=	1.5	IW	=	4.39
Constraint	Flags:	fO2	path	=	QFM	Fractionate	Solids
Liquid	mass	=	40.49	(gm)	density	=	2.31	(gm/cc)	viscosity	=	3.72	(log	10	poise)	(analysis	in	wt	%)
	G	=	-661296	(J)	H	=	-531829	(J)	S	=	113.25	(J/K)	V	=	17.49	(cc)	Cp	=	57.45	(J/K)
	SiO2	TiO2	Al2O3	Fe2O3	Cr2O3	FeO	MnO	MgO	NiO	CoO	CaO	Na2O	K2O	P2O5	H2O	CO2	SO3	Cl2O-1	F2O-1
	60.11	0.24	17.63	0.63	0	2.27	0.62	0.36	0	0	2.77	5.01	3.03	0.71	6.62	0	0	0	0
garnet	mass	=	0.27	(gm)	density	=	3.91	(gm/cc)	(analysis	in	mole	%)
	(Ca0.16Fe''0.56Mg0.29)3Al2Si3O12
	G	=	-3702.54	(J)	H	=	-3092.63	(J)	S	=	0.53	(J/K)	V	=	0.07	(cc)	Cp	=	0.29	(J/K)
	almandine	grossular	pyrope
	55.81	15.64	28.55
feldspar	mass	=	0.83	(gm)	density	=	2.64	(gm/cc)	(analysis	in	mole	%)
	K0.02Na0.57Ca0.41Al1.41Si2.59O8
	G	=	-13615.9	(J)	H	=	-11537.4	(J)	S	=	1.82	(J/K)	V	=	0.31	(cc)	Cp	=	1	(J/K)
	albite	anorthite	sanidine
	56.7	40.86	2.44
spinel	mass	=	0.07	(gm)	density	=	4.85	(gm/cc)	(analysis	in	mole	%)
	Fe''1.19Mg0.09Fe'''1.25Al0.20Cr0.00Ti0.27O4
	G	=	-506.58	(J)	H	=	-356.7	(J)	S	=	0.13	(J/K)	V	=	0.01	(cc)	Cp	=	0.06	(J/K)
	chromite	hercynite	magnetite	spinel	ulvospinel
	0	1.25	62.7	8.75	27.3
apatite	mass	=	0	(gm)	density	=	3.06	(gm/cc)
	Ca5(PO4)3OH
	G	=	-22.95	(J)	H	=	-19.2	(J)	S	=	0	(J/K)	V	=	0	(cc)	Cp	=	0	(J/K)
Total	solids	mass	=	1.17	(gm)	density	=	2.94	(gm/cc)
	G	=	-17847.9	(J)	H	=	-15005.9	(J)	S	=	2.49	(J/K)	V	=	0.4	(cc)	Cp	=	1.36	(J/K)
Summary	of	all	fractionated	phases:	(total	mass	=	57.1	grams)
garnet	mass	=	0.52	(gm)	density	=	3.9	(gm/cc)	(analysis	in	mole	%)
	(Ca0.16Fe''0.54Mg0.29)3Al2Si3O12
	G	=	-7216.92	(J)	H	=	-6032.22	(J)	S	=	1.04	(J/K)	V	=	0.13	(cc)	Cp	=	0.57	(J/K)
	almandine	grossular	pyrope
	54.36	16.14	29.5
orthopyroxene	mass	=	0.63	(gm)	density	=	3.5	(gm/cc)	(analysis	in	mole	%)
	opx	Na0.00Ca0.04Fe''0.82Mg1.03Fe'''0.03Ti0.00Al0.16Si1.90O6
	G	=	-8623.93	(J)	H	=	-7133.6	(J)	S	=	1.3	(J/K)	V	=	0.18	(cc)	Cp	=	0.73	(J/K)
	diopside	clinoenstatit	hedenbergite	alumino-buffo	buffonite	essenite	jadeite
	-87.7	95.44	82.35	6.89	-6.55	9.3	0.27
clinopyroxene	mass	=	30.46	(gm)	density	=	3.37	(gm/cc)	(analysis	in	mole	%)
	cpx	Na0.03Ca0.85Fe''0.23Mg0.68Fe'''0.09Ti0.09Al0.33Si1.72O6
	G	=	-455854	(J)	H	=	-384868	(J)	S	=	62.1	(J/K)	V	=	9.05	(cc)	Cp	=	34.25	(J/K)
	diopside	clinoenstatit	hedenbergite	alumino-buffo	buffonite	essenite	jadeite
	33.24	12.85	23.05	19.72	-2.24	10.81	2.57
clinopyroxene	mass	=	0.18	(gm)	density	=	3.52	(gm/cc)	(analysis	in	mole	%)
	cpx	Na0.03Ca0.93Fe''0.23Mg0.40Fe'''0.10Ti0.32Al0.69Si1.30O6
	G	=	-2654.36	(J)	H	=	-2243.06	(J)	S	=	0.36	(J/K)	V	=	0.05	(cc)	Cp	=	0.2	(J/K)
	diopside	clinoenstatit	hedenbergite	alumino-buffo	buffonite	essenite	jadeite
	-0.58	4.36	23.45	59.79	3.87	6.32	2.8
feldspar	mass	=	11.17	(gm)	density	=	2.66	(gm/cc)	(analysis	in	mole	%)
	K0.02Na0.45Ca0.53Al1.53Si2.47O8
	G	=	-183756	(J)	H	=	-155958	(J)	S	=	24.32	(J/K)	V	=	4.2	(cc)	Cp	=	13.41	(J/K)
	albite	anorthite	sanidine
	45.2	53.25	1.55
spinel	mass	=	13.14	(gm)	density	=	4.65	(gm/cc)	(analysis	in	mole	%)
	Fe''1.17Mg0.28Fe'''0.86Al0.24Cr0.00Ti0.45O4
	G	=	-109092	(J)	H	=	-79826.1	(J)	S	=	25.6	(J/K)	V	=	2.83	(cc)	Cp	=	12.11	(J/K)
	chromite	hercynite	magnetite	spinel	ulvospinel
	0	-15.44	42.94	27.57	44.93
apatite	mass	=	1	(gm)	density	=	3.06	(gm/cc)
	Ca5(PO4)3OH
	G	=	-14714.9	(J)	H	=	-12310	(J)	S	=	2.1	(J/K)	V	=	0.33	(cc)	Cp	=	1.13	(J/K)
Viscosity	of	the	System:	7.76	(log	10	poise)
System	mass	=	98.76	(gm)	density	=	2.85	(gm/cc)
	G	=	-1.46106e+06	(J)	H	=	-1.19521e+06	(J)	S	=	232.56	(J/K)	V	=	34.66	(cc)	Cp	=	121.21	(J/K)
Oxygen	delta	moles	=	0.0106469	delta	grams	=	0.340688
	G	=	-2726.37	(J)	H	=	295.23	(J)	S	=	2.64	(J/K)	V	=	1011.93	(cc)	Cp	=	0.38	(J/K)
**********----------**********
Title:	Dummy	Title
T	=	860	(C)	P	=	5	(kbars)	log(10)	f	O2	=	-12.79	delta	HM	=	-5.23	NNO	=	-0.15	QFM	=	0	COH	=	1.48	IW	=	4.42
Constraint	Flags:	fO2	path	=	QFM	Fractionate	Solids
Liquid	mass	=	39.39	(gm)	density	=	2.31	(gm/cc)	viscosity	=	3.74	(log	10	poise)	(analysis	in	wt	%)
	G	=	-643210	(J)	H	=	-518421	(J)	S	=	110.13	(J/K)	V	=	17.06	(cc)	Cp	=	55.86	(J/K)
	SiO2	TiO2	Al2O3	Fe2O3	Cr2O3	FeO	MnO	MgO	NiO	CoO	CaO	Na2O	K2O	P2O5	H2O	CO2	SO3	Cl2O-1	F2O-1
	60.35	0.24	17.45	0.59	0	2.1	0.63	0.32	0	0	2.66	5.02	3.1	0.73	6.81	0	0	0	0
garnet	mass	=	0.24	(gm)	density	=	3.92	(gm/cc)	(analysis	in	mole	%)
	(Ca0.15Fe''0.57Mg0.28)3Al2Si3O12
	G	=	-3289.9	(J)	H	=	-2753.21	(J)	S	=	0.47	(J/K)	V	=	0.06	(cc)	Cp	=	0.26	(J/K)
	almandine	grossular	pyrope
	56.84	15.25	27.91
feldspar	mass	=	0.82	(gm)	density	=	2.63	(gm/cc)	(analysis	in	mole	%)
	K0.03Na0.59Ca0.39Al1.39Si2.61O8
	G	=	-13420.1	(J)	H	=	-11393.3	(J)	S	=	1.79	(J/K)	V	=	0.31	(cc)	Cp	=	0.99	(J/K)
	albite	anorthite	sanidine
	58.69	38.64	2.67
spinel	mass	=	0.06	(gm)	density	=	4.85	(gm/cc)	(analysis	in	mole	%)
	Fe''1.20Mg0.08Fe'''1.25Al0.19Cr0.00Ti0.28O4
	G	=	-456.9	(J)	H	=	-322.72	(J)	S	=	0.12	(J/K)	V	=	0.01	(cc)	Cp	=	0.06	(J/K)
	chromite	hercynite	magnetite	spinel	ulvospinel
	0	1.17	62.65	8.31	27.87
Total	solids	mass	=	1.12	(gm)	density	=	2.91	(gm/cc)
	G	=	-17166.9	(J)	H	=	-14469.2	(J)	S	=	2.38	(J/K)	V	=	0.38	(cc)	Cp	=	1.3	(J/K)
Summary	of	all	fractionated	phases:	(total	mass	=	58.26	grams)
garnet	mass	=	0.79	(gm)	density	=	3.9	(gm/cc)	(analysis	in	mole	%)
	(Ca0.16Fe''0.55Mg0.29)3Al2Si3O12
	G	=	-10840.1	(J)	H	=	-9080.19	(J)	S	=	1.55	(J/K)	V	=	0.2	(cc)	Cp	=	0.86	(J/K)
	almandine	grossular	pyrope
	54.85	15.98	29.18
orthopyroxene	mass	=	0.63	(gm)	density	=	3.5	(gm/cc)	(analysis	in	mole	%)
	opx	Na0.00Ca0.04Fe''0.82Mg1.03Fe'''0.03Ti0.00Al0.16Si1.90O6
	G	=	-8610.92	(J)	H	=	-7140.9	(J)	S	=	1.3	(J/K)	V	=	0.18	(cc)	Cp	=	0.73	(J/K)
	diopside	clinoenstatit	hedenbergite	alumino-buffo	buffonite	essenite	jadeite
	-87.7	95.44	82.35	6.89	-6.55	9.3	0.27
clinopyroxene	mass	=	30.46	(gm)	density	=	3.37	(gm/cc)	(analysis	in	mole	%)
	cpx	Na0.03Ca0.85Fe''0.23Mg0.68Fe'''0.09Ti0.09Al0.33Si1.72O6
	G	=	-455234	(J)	H	=	-385210	(J)	S	=	61.8	(J/K)	V	=	9.04	(cc)	Cp	=	34.22	(J/K)
	diopside	clinoenstatit	hedenbergite	alumino-buffo	buffonite	essenite	jadeite
	33.24	12.85	23.05	19.72	-2.24	10.81	2.57
clinopyroxene	mass	=	0.18	(gm)	density	=	3.52	(gm/cc)	(analysis	in	mole	%)
	cpx	Na0.03Ca0.93Fe''0.23Mg0.40Fe'''0.10Ti0.32Al0.69Si1.30O6
	G	=	-2650.77	(J)	H	=	-2245.03	(J)	S	=	0.36	(J/K)	V	=	0.05	(cc)	Cp	=	0.2	(J/K)
	diopside	clinoenstatit	hedenbergite	alumino-buffo	buffonite	essenite	jadeite
	-0.58	4.36	23.45	59.79	3.87	6.32	2.8
feldspar	mass	=	11.99	(gm)	density	=	2.66	(gm/cc)	(analysis	in	mole	%)
	K0.02Na0.46Ca0.52Al1.52Si2.48O8
	G	=	-197067	(J)	H	=	-167602	(J)	S	=	26	(J/K)	V	=	4.51	(cc)	Cp	=	14.4	(J/K)
	albite	anorthite	sanidine
	45.99	52.4	1.61
spinel	mass	=	13.21	(gm)	density	=	4.65	(gm/cc)	(analysis	in	mole	%)
	Fe''1.17Mg0.27Fe'''0.86Al0.24Cr0.00Ti0.45O4
	G	=	-109326	(J)	H	=	-80292.6	(J)	S	=	25.62	(J/K)	V	=	2.84	(cc)	Cp	=	12.16	(J/K)
	chromite	hercynite	magnetite	spinel	ulvospinel
	0	-15.36	43.03	27.48	44.84
apatite	mass	=	1	(gm)	density	=	3.06	(gm/cc)
	Ca5(PO4)3OH
	G	=	-14643.1	(J)	H	=	-12278.6	(J)	S	=	2.09	(J/K)	V	=	0.33	(cc)	Cp	=	1.12	(J/K)
Viscosity	of	the	System	cannot	be	computed.
System	mass	=	98.76	(gm)	density	=	2.85	(gm/cc)
	G	=	-1.45875e+06	(J)	H	=	-1.19674e+06	(J)	S	=	231.22	(J/K)	V	=	34.6	(cc)	Cp	=	120.84	(J/K)
Oxygen	delta	moles	=	0.0106686	delta	grams	=	0.341381
	G	=	-2705.44	(J)	H	=	292.06	(J)	S	=	2.65	(J/K)	V	=	1005.12	(cc)	Cp	=	0.38	(J/K)
**********----------**********
Title:	Dummy	Title
T	=	850	(C)	P	=	5	(kbars)	log(10)	f	O2	=	-12.98	delta	HM	=	-5.23	NNO	=	-0.15	QFM	=	0	COH	=	1.46	IW	=	4.44
Constraint	Flags:	fO2	path	=	QFM	Fractionate	Solids
Liquid	mass	=	38.32	(gm)	density	=	2.3	(gm/cc)	viscosity	=	3.75	(log	10	poise)	(analysis	in	wt	%)
	G	=	-625703	(J)	H	=	-505409	(J)	S	=	107.1	(J/K)	V	=	16.64	(cc)	Cp	=	54.33	(J/K)
	SiO2	TiO2	Al2O3	Fe2O3	Cr2O3	FeO	MnO	MgO	NiO	CoO	CaO	Na2O	K2O	P2O5	H2O	CO2	SO3	Cl2O-1	F2O-1
	60.58	0.23	17.26	0.56	0	1.94	0.65	0.29	0	0	2.54	5.01	3.18	0.75	7	0	0	0	0
garnet	mass	=	0.22	(gm)	density	=	3.93	(gm/cc)	(analysis	in	mole	%)
	(Ca0.15Fe''0.58Mg0.27)3Al2Si3O12
	G	=	-2931.62	(J)	H	=	-2458.04	(J)	S	=	0.42	(J/K)	V	=	0.05	(cc)	Cp	=	0.23	(J/K)
	almandine	grossular	pyrope
	57.89	14.81	27.3
feldspar	mass	=	0.81	(gm)	density	=	2.63	(gm/cc)	(analysis	in	mole	%)
	K0.03Na0.61Ca0.36Al1.36Si2.64O8
	G	=	-13198.5	(J)	H	=	-11226.7	(J)	S	=	1.76	(J/K)	V	=	0.31	(cc)	Cp	=	0.97	(J/K)
	albite	anorthite	sanidine
	60.64	36.44	2.92
spinel	mass	=	0.06	(gm)	density	=	4.86	(gm/cc)	(analysis	in	mole	%)
	Fe''1.21Mg0.08Fe'''1.25Al0.18Cr0.00Ti0.28O4
	G	=	-412.24	(J)	H	=	-292.12	(J)	S	=	0.11	(J/K)	V	=	0.01	(cc)	Cp	=	0.05	(J/K)
	chromite	hercynite	magnetite	spinel	ulvospinel
	0	1.09	62.57	7.89	28.45
Total	solids	mass	=	1.08	(gm)	density	=	2.89	(gm/cc)
	G	=	-16542.4	(J)	H	=	-13976.9	(J)	S	=	2.28	(J/K)	V	=	0.37	(cc)	Cp	=	1.26	(J/K)
Summary	of	all	fractionated	phases:	(total	mass	=	59.37	grams)
garnet	mass	=	1.02	(gm)	density	=	3.91	(gm/cc)	(analysis	in	mole	%)
	(Ca0.16Fe''0.55Mg0.29)3Al2Si3O12
	G	=	-14046.4	(J)	H	=	-11791.4	(J)	S	=	2.01	(J/K)	V	=	0.26	(cc)	Cp	=	1.11	(J/K)
	almandine	grossular	pyrope
	55.31	15.81	28.89
orthopyroxene	mass	=	0.63	(gm)	density	=	3.5	(gm/cc)	(analysis	in	mole	%)
	opx	Na0.00Ca0.04Fe''0.82Mg1.03Fe'''0.03Ti0.00Al0.16Si1.90O6
	G	=	-8597.98	(J)	H	=	-7148.19	(J)	S	=	1.29	(J/K)	V	=	0.18	(cc)	Cp	=	0.73	(J/K)
	diopside	clinoenstatit	hedenbergite	alumino-buffo	buffonite	essenite	jadeite
	-87.7	95.44	82.35	6.89	-6.55	9.3	0.27
clinopyroxene	mass	=	30.46	(gm)	density	=	3.37	(gm/cc)	(analysis	in	mole	%)
	cpx	Na0.03Ca0.85Fe''0.23Mg0.68Fe'''0.09Ti0.09Al0.33Si1.72O6
	G	=	-454618	(J)	H	=	-385552	(J)	S	=	61.49	(J/K)	V	=	9.04	(cc)	Cp	=	34.18	(J/K)
	diopside	clinoenstatit	hedenbergite	alumino-buffo	buffonite	essenite	jadeite
	33.24	12.85	23.05	19.72	-2.24	10.81	2.57
clinopyroxene	mass	=	0.18	(gm)	density	=	3.52	(gm/cc)	(analysis	in	mole	%)
	cpx	Na0.03Ca0.93Fe''0.23Mg0.40Fe'''0.10Ti0.32Al0.69Si1.30O6
	G	=	-2647.19	(J)	H	=	-2247.01	(J)	S	=	0.36	(J/K)	V	=	0.05	(cc)	Cp	=	0.2	(J/K)
	diopside	clinoenstatit	hedenbergite	alumino-buffo	buffonite	essenite	jadeite
	-0.58	4.36	23.45	59.79	3.87	6.32	2.8
feldspar	mass	=	12.81	(gm)	density	=	2.66	(gm/cc)	(analysis	in	mole	%)
	K0.02Na0.47Ca0.52Al1.52Si2.48O8
	G	=	-210167	(J)	H	=	-179111	(J)	S	=	27.65	(J/K)	V	=	4.82	(cc)	Cp	=	15.36	(J/K)
	albite	anorthite	sanidine
	46.81	51.51	1.68
spinel	mass	=	13.27	(gm)	density	=	4.65	(gm/cc)	(analysis	in	mole	%)
	Fe''1.17Mg0.27Fe'''0.86Al0.24Cr0.00Ti0.45O4
	G	=	-109510	(J)	H	=	-80725.6	(J)	S	=	25.63	(J/K)	V	=	2.85	(cc)	Cp	=	12.2	(J/K)
	chromite	hercynite	magnetite	spinel	ulvospinel
	0	-15.28	43.12	27.4	44.77
apatite	mass	=	1	(gm)	density	=	3.06	(gm/cc)
	Ca5(PO4)3OH
	G	=	-14622.2	(J)	H	=	-12289.8	(J)	S	=	2.08	(J/K)	V	=	0.33	(cc)	Cp	=	1.12	(J/K)
Viscosity	of	the	System	cannot	be	computed.
System	mass	=	98.76	(gm)	density	=	2.86	(gm/cc)
	G	=	-1.45645e+06	(J)	H	=	-1.19825e+06	(J)	S	=	229.89	(J/K)	V	=	34.54	(cc)	Cp	=	120.49	(J/K)
Oxygen	delta	moles	=	0.0106866	delta	grams	=	0.341958
	G	=	-2683.53	(J)	H	=	288.77	(J)	S	=	2.65	(J/K)	V	=	997.93	(cc)	Cp	=	0.38	(J/K)
**********----------**********
Title:	Dummy	Title
T	=	840	(C)	P	=	5	(kbars)	log(10)	f	O2	=	-13.17	delta	HM	=	-5.23	NNO	=	-0.14	QFM	=	0	COH	=	1.44	IW	=	4.46
Constraint	Flags:	fO2	path	=	QFM	Fractionate	Solids
Liquid	mass	=	37.29	(gm)	density	=	2.3	(gm/cc)	viscosity	=	3.77	(log	10	poise)	(analysis	in	wt	%)
	G	=	-608752	(J)	H	=	-492778	(J)	S	=	104.19	(J/K)	V	=	16.23	(cc)	Cp	=	52.85	(J/K)
	SiO2	TiO2	Al2O3	Fe2O3	Cr2O3	FeO	MnO	MgO	NiO	CoO	CaO	Na2O	K2O	P2O5	H2O	CO2	SO3	Cl2O-1	F2O-1
	60.8	0.22	17.08	0.53	0	1.79	0.67	0.26	0	0	2.43	4.99	3.26	0.77	7.19	0	0	0	0
garnet	mass	=	0.19	(gm)	density	=	3.94	(gm/cc)	(analysis	in	mole	%)
	(Ca0.14Fe''0.59Mg0.27)3Al2Si3O12
	G	=	-2611.51	(J)	H	=	-2193.8	(J)	S	=	0.38	(J/K)	V	=	0.05	(cc)	Cp	=	0.21	(J/K)
	almandine	grossular	pyrope
	58.95	14.34	26.71
feldspar	mass	=	0.8	(gm)	density	=	2.63	(gm/cc)	(analysis	in	mole	%)
	K0.03Na0.63Ca0.34Al1.34Si2.66O8
	G	=	-13030.1	(J)	H	=	-11104.8	(J)	S	=	1.73	(J/K)	V	=	0.3	(cc)	Cp	=	0.96	(J/K)
	albite	anorthite	sanidine
	62.54	34.26	3.21
spinel	mass	=	0.05	(gm)	density	=	4.86	(gm/cc)	(analysis	in	mole	%)
	Fe''1.22Mg0.07Fe'''1.25Al0.17Cr0.00Ti0.29O4
	G	=	-372.72	(J)	H	=	-265	(J)	S	=	0.1	(J/K)	V	=	0.01	(cc)	Cp	=	0.05	(J/K)
	chromite	hercynite	magnetite	spinel	ulvospinel
	0	1.02	62.44	7.5	29.04
Total	solids	mass	=	1.04	(gm)	density	=	2.87	(gm/cc)
	G	=	-16014.4	(J)	H	=	-13563.6	(J)	S	=	2.2	(J/K)	V	=	0.36	(cc)	Cp	=	1.22	(J/K)
Summary	of	all	fractionated	phases:	(total	mass	=	60.44	grams)
garnet	mass	=	1.23	(gm)	density	=	3.91	(gm/cc)	(analysis	in	mole	%)
	(Ca0.16Fe''0.56Mg0.29)3Al2Si3O12
	G	=	-16890.5	(J)	H	=	-14209.7	(J)	S	=	2.41	(J/K)	V	=	0.31	(cc)	Cp	=	1.34	(J/K)
	almandine	grossular	pyrope
	55.75	15.64	28.62
orthopyroxene	mass	=	0.63	(gm)	density	=	3.5	(gm/cc)	(analysis	in	mole	%)
	opx	Na0.00Ca0.04Fe''0.82Mg1.03Fe'''0.03Ti0.00Al0.16Si1.90O6
	G	=	-8585.11	(J)	H	=	-7155.47	(J)	S	=	1.28	(J/K)	V	=	0.18	(cc)	Cp	=	0.73	(J/K)
	diopside	clinoenstatit	hedenbergite	alumino-buffo	buffonite	essenite	jadeite
	-87.7	95.44	82.35	6.89	-6.55	9.3	0.27
clinopyroxene	mass	=	30.46	(gm)	density	=	3.37	(gm/cc)	(analysis	in	mole	%)
	cpx	Na0.03Ca0.85Fe''0.23Mg0.68Fe'''0.09Ti0.09Al0.33Si1.72O6
	G	=	-454004	(J)	H	=	-385894	(J)	S	=	61.19	(J/K)	V	=	9.04	(cc)	Cp	=	34.14	(J/K)
	diopside	clinoenstatit	hedenbergite	alumino-buffo	buffonite	essenite	jadeite
	33.24	12.85	23.05	19.72	-2.24	10.81	2.57
clinopyroxene	mass	=	0.18	(gm)	density	=	3.52	(gm/cc)	(analysis	in	mole	%)
	cpx	Na0.03Ca0.93Fe''0.23Mg0.40Fe'''0.10Ti0.32Al0.69Si1.30O6
	G	=	-2643.64	(J)	H	=	-2248.98	(J)	S	=	0.35	(J/K)	V	=	0.05	(cc)	Cp	=	0.2	(J/K)
	diopside	clinoenstatit	hedenbergite	alumino-buffo	buffonite	essenite	jadeite
	-0.58	4.36	23.45	59.79	3.87	6.32	2.8
feldspar	mass	=	13.61	(gm)	density	=	2.66	(gm/cc)	(analysis	in	mole	%)
	K0.02Na0.48Ca0.51Al1.51Si2.49O8
	G	=	-223029	(J)	H	=	-190464	(J)	S	=	29.26	(J/K)	V	=	5.12	(cc)	Cp	=	16.32	(J/K)
	albite	anorthite	sanidine
	47.63	50.62	1.75
spinel	mass	=	13.33	(gm)	density	=	4.66	(gm/cc)	(analysis	in	mole	%)
	Fe''1.17Mg0.27Fe'''0.86Al0.24Cr0.00Ti0.45O4
	G	=	-109650	(J)	H	=	-81128.4	(J)	S	=	25.62	(J/K)	V	=	2.86	(cc)	Cp	=	12.23	(J/K)
	chromite	hercynite	magnetite	spinel	ulvospinel
	0	-15.22	43.19	27.32	44.7
apatite	mass	=	1	(gm)	density	=	3.06	(gm/cc)
	Ca5(PO4)3OH
	G	=	-14601.5	(J)	H	=	-12301	(J)	S	=	2.07	(J/K)	V	=	0.33	(cc)	Cp	=	1.12	(J/K)
Viscosity	of	the	System	cannot	be	computed.
System	mass	=	98.76	(gm)	density	=	2.86	(gm/cc)
	G	=	-1.45417e+06	(J)	H	=	-1.19974e+06	(J)	S	=	228.57	(J/K)	V	=	34.49	(cc)	Cp	=	120.14	(J/K)
Oxygen	delta	moles	=	0.0107016	delta	grams	=	0.342438
	G	=	-2660.82	(J)	H	=	285.4	(J)	S	=	2.65	(J/K)	V	=	990.44	(cc)	Cp	=	0.38	(J/K)
**********----------**********
Title:	Dummy	Title
T	=	830	(C)	P	=	5	(kbars)	log(10)	f	O2	=	-13.37	delta	HM	=	-5.23	NNO	=	-0.13	QFM	=	0	COH	=	1.42	IW	=	4.49
Constraint	Flags:	fO2	path	=	QFM	Fractionate	Solids
Liquid	mass	=	36.29	(gm)	density	=	2.29	(gm/cc)	viscosity	=	3.78	(log	10	poise)	(analysis	in	wt	%)
	G	=	-592296	(J)	H	=	-480481	(J)	S	=	101.36	(J/K)	V	=	15.84	(cc)	Cp	=	51.42	(J/K)
	SiO2	TiO2	Al2O3	Fe2O3	Cr2O3	FeO	MnO	MgO	NiO	CoO	CaO	Na2O	K2O	P2O5	H2O	CO2	SO3	Cl2O-1	F2O-1
	60.99	0.21	16.9	0.5	0	1.66	0.69	0.24	0	0	2.33	4.97	3.33	0.79	7.39	0	0	0	0
garnet	mass	=	0.17	(gm)	density	=	3.95	(gm/cc)	(analysis	in	mole	%)
	(Ca0.14Fe''0.60Mg0.26)3Al2Si3O12
	G	=	-2329.21	(J)	H	=	-1960.37	(J)	S	=	0.33	(J/K)	V	=	0.04	(cc)	Cp	=	0.19	(J/K)
	almandine	grossular	pyrope
	60.02	13.83	26.14
feldspar	mass	=	0.79	(gm)	density	=	2.62	(gm/cc)	(analysis	in	mole	%)
	K0.04Na0.64Ca0.32Al1.32Si2.68O8
	G	=	-12881.3	(J)	H	=	-10999.1	(J)	S	=	1.71	(J/K)	V	=	0.3	(cc)	Cp	=	0.95	(J/K)
	albite	anorthite	sanidine
	64.39	32.09	3.53
spinel	mass	=	0.05	(gm)	density	=	4.87	(gm/cc)	(analysis	in	mole	%)
	Fe''1.23Mg0.07Fe'''1.25Al0.16Cr0.00Ti0.30O4
	G	=	-337.31	(J)	H	=	-240.65	(J)	S	=	0.09	(J/K)	V	=	0.01	(cc)	Cp	=	0.04	(J/K)
	chromite	hercynite	magnetite	spinel	ulvospinel
	0	0.94	62.28	7.12	29.65
Total	solids	mass	=	1.01	(gm)	density	=	2.85	(gm/cc)
	G	=	-15547.8	(J)	H	=	-13200.1	(J)	S	=	2.13	(J/K)	V	=	0.35	(cc)	Cp	=	1.18	(J/K)
Summary	of	all	fractionated	phases:	(total	mass	=	61.47	grams)
garnet	mass	=	1.42	(gm)	density	=	3.92	(gm/cc)	(analysis	in	mole	%)
	(Ca0.15Fe''0.56Mg0.28)3Al2Si3O12
	G	=	-19411.2	(J)	H	=	-16365.9	(J)	S	=	2.76	(J/K)	V	=	0.36	(cc)	Cp	=	1.54	(J/K)
	almandine	grossular	pyrope
	56.17	15.47	28.36
orthopyroxene	mass	=	0.63	(gm)	density	=	3.5	(gm/cc)	(analysis	in	mole	%)
	opx	Na0.00Ca0.04Fe''0.82Mg1.03Fe'''0.03Ti0.00Al0.16Si1.90O6
	G	=	-8572.29	(J)	H	=	-7162.75	(J)	S	=	1.28	(J/K)	V	=	0.18	(cc)	Cp	=	0.73	(J/K)
	diopside	clinoenstatit	hedenbergite	alumino-buffo	buffonite	essenite	jadeite
	-87.7	95.44	82.35	6.89	-6.55	9.3	0.27
clinopyroxene	mass	=	30.46	(gm)	density	=	3.37	(gm/cc)	(analysis	in	mole	%)
	cpx	Na0.03Ca0.85Fe''0.23Mg0.68Fe'''0.09Ti0.09Al0.33Si1.72O6
	G	=	-453394	(J)	H	=	-386235	(J)	S	=	60.88	(J/K)	V	=	9.03	(cc)	Cp	=	34.1	(J/K)
	diopside	clinoenstatit	hedenbergite	alumino-buffo	buffonite	essenite	jadeite
	33.24	12.85	23.05	19.72	-2.24	10.81	2.57
clinopyroxene	mass	=	0.18	(gm)	density	=	3.52	(gm/cc)	(analysis	in	mole	%)
	cpx	Na0.03Ca0.93Fe''0.23Mg0.40Fe'''0.10Ti0.32Al0.69Si1.30O6
	G	=	-2640.1	(J)	H	=	-2250.95	(J)	S	=	0.35	(J/K)	V	=	0.05	(cc)	Cp	=	0.2	(J/K)
	diopside	clinoenstatit	hedenbergite	alumino-buffo	buffonite	essenite	jadeite
	-0.58	4.36	23.45	59.79	3.87	6.32	2.8
feldspar	mass	=	14.41	(gm)	density	=	2.66	(gm/cc)	(analysis	in	mole	%)
	K0.02Na0.48Ca0.50Al1.50Si2.50O8
	G	=	-235707	(J)	H	=	-201703	(J)	S	=	30.82	(J/K)	V	=	5.42	(cc)	Cp	=	17.26	(J/K)
	albite	anorthite	sanidine
	48.46	49.71	1.83
spinel	mass	=	13.38	(gm)	density	=	4.66	(gm/cc)	(analysis	in	mole	%)
	Fe''1.17Mg0.27Fe'''0.87Al0.24Cr0.00Ti0.45O4
	G	=	-109750	(J)	H	=	-81504.5	(J)	S	=	25.6	(J/K)	V	=	2.87	(cc)	Cp	=	12.26	(J/K)
	chromite	hercynite	magnetite	spinel	ulvospinel
	0	-15.16	43.26	27.25	44.65
apatite	mass	=	1	(gm)	density	=	3.06	(gm/cc)
	Ca5(PO4)3OH
	G	=	-14580.9	(J)	H	=	-12312.2	(J)	S	=	2.06	(J/K)	V	=	0.33	(cc)	Cp	=	1.12	(J/K)
Viscosity	of	the	System	cannot	be	computed.
System	mass	=	98.76	(gm)	density	=	2.87	(gm/cc)
	G	=	-1.4519e+06	(J)	H	=	-1.20122e+06	(J)	S	=	227.24	(J/K)	V	=	34.44	(cc)	Cp	=	119.81	(J/K)
Oxygen	delta	moles	=	0.010714	delta	grams	=	0.342835
	G	=	-2637.42	(J)	H	=	281.95	(J)	S	=	2.65	(J/K)	V	=	982.68	(cc)	Cp	=	0.38	(J/K)
**********----------**********
Title:	Dummy	Title
T	=	820	(C)	P	=	5	(kbars)	log(10)	f	O2	=	-13.57	delta	HM	=	-5.23	NNO	=	-0.12	QFM	=	0	COH	=	1.4	IW	=	4.51
Constraint	Flags:	fO2	path	=	QFM	Fractionate	Solids
Liquid	mass	=	35.32	(gm)	density	=	2.29	(gm/cc)	viscosity	=	3.79	(log	10	poise)	(analysis	in	wt	%)
	G	=	-576208	(J)	H	=	-468412	(J)	S	=	98.61	(J/K)	V	=	15.45	(cc)	Cp	=	50.03	(J/K)
	SiO2	TiO2	Al2O3	Fe2O3	Cr2O3	FeO	MnO	MgO	NiO	CoO	CaO	Na2O	K2O	P2O5	H2O	CO2	SO3	Cl2O-1	F2O-1
	61.16	0.2	16.72	0.47	0	1.53	0.71	0.21	0	0	2.24	4.94	3.41	0.81	7.59	0	0	0	0
garnet	mass	=	0.17	(gm)	density	=	3.96	(gm/cc)	(analysis	in	mole	%)
	(Ca0.13Fe''0.61Mg0.25)3Al2Si3O12
	G	=	-2286.35	(J)	H	=	-1927.82	(J)	S	=	0.33	(J/K)	V	=	0.04	(cc)	Cp	=	0.18	(J/K)
	almandine	grossular	pyrope
	61.26	13.32	25.42
feldspar	mass	=	0.77	(gm)	density	=	2.62	(gm/cc)	(analysis	in	mole	%)
	K0.04Na0.66Ca0.30Al1.30Si2.70O8
	G	=	-12639.3	(J)	H	=	-10813.3	(J)	S	=	1.67	(J/K)	V	=	0.3	(cc)	Cp	=	0.94	(J/K)
	albite	anorthite	sanidine
	66.18	29.93	3.9
spinel	mass	=	0.03	(gm)	density	=	4.88	(gm/cc)	(analysis	in	mole	%)
	Fe''1.23Mg0.07Fe'''1.25Al0.15Cr0.00Ti0.30O4
	G	=	-204.48	(J)	H	=	-146.35	(J)	S	=	0.05	(J/K)	V	=	0.01	(cc)	Cp	=	0.03	(J/K)
	chromite	hercynite	magnetite	spinel	ulvospinel
	0	1.01	62.52	6.68	29.78
rhm-oxide	mass	=	0.01	(gm)	density	=	4.64	(gm/cc)	(analysis	in	mole	%)
	Mn0.04Fe''0.71Mg0.10Fe'''0.19Al0.12Ti0.84O3
	G	=	-66.86	(J)	H	=	-53.08	(J)	S	=	0.01	(J/K)	V	=	0	(cc)	Cp	=	0.01	(J/K)
	geikielite	hematite	ilmenite	pyrophanite	corundum
	9.88	9.5	70.69	3.8	6.13
Total	solids	mass	=	0.98	(gm)	density	=	2.83	(gm/cc)
	G	=	-15197	(J)	H	=	-12940.5	(J)	S	=	2.06	(J/K)	V	=	0.35	(cc)	Cp	=	1.15	(J/K)
Summary	of	all	fractionated	phases:	(total	mass	=	62.47	grams)
garnet	mass	=	1.59	(gm)	density	=	3.92	(gm/cc)	(analysis	in	mole	%)
	(Ca0.15Fe''0.57Mg0.28)3Al2Si3O12
	G	=	-21646.8	(J)	H	=	-18290.6	(J)	S	=	3.07	(J/K)	V	=	0.41	(cc)	Cp	=	1.72	(J/K)
	almandine	grossular	pyrope
	56.57	15.3	28.13
orthopyroxene	mass	=	0.63	(gm)	density	=	3.5	(gm/cc)	(analysis	in	mole	%)
	opx	Na0.00Ca0.04Fe''0.82Mg1.03Fe'''0.03Ti0.00Al0.16Si1.90O6
	G	=	-8559.55	(J)	H	=	-7170.02	(J)	S	=	1.27	(J/K)	V	=	0.18	(cc)	Cp	=	0.73	(J/K)
	diopside	clinoenstatit	hedenbergite	alumino-buffo	buffonite	essenite	jadeite
	-87.7	95.44	82.35	6.89	-6.55	9.3	0.27
clinopyroxene	mass	=	30.46	(gm)	density	=	3.37	(gm/cc)	(analysis	in	mole	%)
	cpx	Na0.03Ca0.85Fe''0.23Mg0.68Fe'''0.09Ti0.09Al0.33Si1.72O6
	G	=	-452787	(J)	H	=	-386576	(J)	S	=	60.57	(J/K)	V	=	9.03	(cc)	Cp	=	34.06	(J/K)
	diopside	clinoenstatit	hedenbergite	alumino-buffo	buffonite	essenite	jadeite
	33.24	12.85	23.05	19.72	-2.24	10.81	2.57
clinopyroxene	mass	=	0.18	(gm)	density	=	3.52	(gm/cc)	(analysis	in	mole	%)
	cpx	Na0.03Ca0.93Fe''0.23Mg0.40Fe'''0.10Ti0.32Al0.69Si1.30O6
	G	=	-2636.59	(J)	H	=	-2252.92	(J)	S	=	0.35	(J/K)	V	=	0.05	(cc)	Cp	=	0.2	(J/K)
	diopside	clinoenstatit	hedenbergite	alumino-buffo	buffonite	essenite	jadeite
	-0.58	4.36	23.45	59.79	3.87	6.32	2.8
feldspar	mass	=	15.19	(gm)	density	=	2.65	(gm/cc)	(analysis	in	mole	%)
	K0.02Na0.49Ca0.49Al1.49Si2.51O8
	G	=	-248222	(J)	H	=	-212847	(J)	S	=	32.36	(J/K)	V	=	5.72	(cc)	Cp	=	18.2	(J/K)
	albite	anorthite	sanidine
	49.29	48.79	1.92
spinel	mass	=	13.42	(gm)	density	=	4.66	(gm/cc)	(analysis	in	mole	%)
	Fe''1.17Mg0.27Fe'''0.87Al0.24Cr0.00Ti0.45O4
	G	=	-109816	(J)	H	=	-81856.4	(J)	S	=	25.58	(J/K)	V	=	2.88	(cc)	Cp	=	12.29	(J/K)
	chromite	hercynite	magnetite	spinel	ulvospinel
	0	-15.11	43.32	27.19	44.6
apatite	mass	=	1	(gm)	density	=	3.06	(gm/cc)
	Ca5(PO4)3OH
	G	=	-14560.4	(J)	H	=	-12323.4	(J)	S	=	2.05	(J/K)	V	=	0.33	(cc)	Cp	=	1.12	(J/K)
Viscosity	of	the	System	cannot	be	computed.
System	mass	=	98.76	(gm)	density	=	2.87	(gm/cc)
	G	=	-1.44963e+06	(J)	H	=	-1.20267e+06	(J)	S	=	225.92	(J/K)	V	=	34.39	(cc)	Cp	=	119.49	(J/K)
Oxygen	delta	moles	=	0.0107096	delta	grams	=	0.342695
	G	=	-2609.91	(J)	H	=	278.06	(J)	S	=	2.64	(J/K)	V	=	973.37	(cc)	Cp	=	0.38	(J/K)
**********----------**********
Title:	Dummy	Title
T	=	810	(C)	P	=	5	(kbars)	log(10)	f	O2	=	-13.77	delta	HM	=	-5.23	NNO	=	-0.11	QFM	=	0	COH	=	1.38	IW	=	4.54
Constraint	Flags:	fO2	path	=	QFM	Fractionate	Solids
Liquid	mass	=	34.37	(gm)	density	=	2.28	(gm/cc)	viscosity	=	3.79	(log	10	poise)	(analysis	in	wt	%)
	G	=	-560410	(J)	H	=	-456503	(J)	S	=	95.93	(J/K)	V	=	15.06	(cc)	Cp	=	48.67	(J/K)
	SiO2	TiO2	Al2O3	Fe2O3	Cr2O3	FeO	MnO	MgO	NiO	CoO	CaO	Na2O	K2O	P2O5	H2O	CO2	SO3	Cl2O-1	F2O-1
	61.31	0.19	16.53	0.45	0	1.44	0.73	0.18	0	0	2.15	4.9	3.49	0.84	7.8	0	0	0	0
garnet	mass	=	0.18	(gm)	density	=	3.97	(gm/cc)	(analysis	in	mole	%)
	(Ca0.13Fe''0.63Mg0.24)3Al2Si3O12
	G	=	-2372.25	(J)	H	=	-2003.7	(J)	S	=	0.34	(J/K)	V	=	0.04	(cc)	Cp	=	0.19	(J/K)
	almandine	grossular	pyrope
	62.78	12.81	24.41
feldspar	mass	=	0.76	(gm)	density	=	2.62	(gm/cc)	(analysis	in	mole	%)
	K0.04Na0.68Ca0.28Al1.28Si2.72O8
	G	=	-12359.3	(J)	H	=	-10594.1	(J)	S	=	1.63	(J/K)	V	=	0.29	(cc)	Cp	=	0.92	(J/K)
	albite	anorthite	sanidine
	67.91	27.76	4.33
spinel	mass	=	0	(gm)	density	=	4.89	(gm/cc)	(analysis	in	mole	%)
	Fe''1.23Mg0.06Fe'''1.27Al0.15Cr0.00Ti0.29O4
	G	=	-32.18	(J)	H	=	-23.09	(J)	S	=	0.01	(J/K)	V	=	0	(cc)	Cp	=	0	(J/K)
	chromite	hercynite	magnetite	spinel	ulvospinel
	0	1.3	63.46	6.13	29.11
rhm-oxide	mass	=	0.02	(gm)	density	=	4.64	(gm/cc)	(analysis	in	mole	%)
	Mn0.04Fe''0.71Mg0.09Fe'''0.19Al0.12Ti0.85O3
	G	=	-173.91	(J)	H	=	-138.41	(J)	S	=	0.03	(J/K)	V	=	0	(cc)	Cp	=	0.02	(J/K)
	geikielite	hematite	ilmenite	pyrophanite	corundum
	9.31	9.43	71.48	3.84	5.94
Total	solids	mass	=	0.96	(gm)	density	=	2.82	(gm/cc)
	G	=	-14937.7	(J)	H	=	-12759.3	(J)	S	=	2.01	(J/K)	V	=	0.34	(cc)	Cp	=	1.13	(J/K)
Summary	of	all	fractionated	phases:	(total	mass	=	63.44	grams)
garnet	mass	=	1.75	(gm)	density	=	3.93	(gm/cc)	(analysis	in	mole	%)
	(Ca0.15Fe''0.57Mg0.28)3Al2Si3O12
	G	=	-23836.6	(J)	H	=	-20184.5	(J)	S	=	3.37	(J/K)	V	=	0.45	(cc)	Cp	=	1.9	(J/K)
	almandine	grossular	pyrope
	57.01	15.11	27.88
orthopyroxene	mass	=	0.63	(gm)	density	=	3.5	(gm/cc)	(analysis	in	mole	%)
	opx	Na0.00Ca0.04Fe''0.82Mg1.03Fe'''0.03Ti0.00Al0.16Si1.90O6
	G	=	-8546.87	(J)	H	=	-7177.28	(J)	S	=	1.26	(J/K)	V	=	0.18	(cc)	Cp	=	0.73	(J/K)
	diopside	clinoenstatit	hedenbergite	alumino-buffo	buffonite	essenite	jadeite
	-87.7	95.44	82.35	6.89	-6.55	9.3	0.27
clinopyroxene	mass	=	30.46	(gm)	density	=	3.37	(gm/cc)	(analysis	in	mole	%)
	cpx	Na0.03Ca0.85Fe''0.23Mg0.68Fe'''0.09Ti0.09Al0.33Si1.72O6
	G	=	-452183	(J)	H	=	-386916	(J)	S	=	60.26	(J/K)	V	=	9.03	(cc)	Cp	=	34.02	(J/K)
	diopside	clinoenstatit	hedenbergite	alumino-buffo	buffonite	essenite	jadeite
	33.24	12.85	23.05	19.72	-2.24	10.81	2.57
clinopyroxene	mass	=	0.18	(gm)	density	=	3.53	(gm/cc)	(analysis	in	mole	%)
	cpx	Na0.03Ca0.93Fe''0.23Mg0.40Fe'''0.10Ti0.32Al0.69Si1.30O6
	G	=	-2633.08	(J)	H	=	-2254.89	(J)	S	=	0.35	(J/K)	V	=	0.05	(cc)	Cp	=	0.2	(J/K)
	diopside	clinoenstatit	hedenbergite	alumino-buffo	buffonite	essenite	jadeite
	-0.58	4.36	23.45	59.79	3.87	6.32	2.8
feldspar	mass	=	15.96	(gm)	density	=	2.65	(gm/cc)	(analysis	in	mole	%)
	K0.02Na0.50Ca0.48Al1.48Si2.52O8
	G	=	-260479	(J)	H	=	-223814	(J)	S	=	33.85	(J/K)	V	=	6.02	(cc)	Cp	=	19.12	(J/K)
	albite	anorthite	sanidine
	50.11	47.87	2.02
spinel	mass	=	13.45	(gm)	density	=	4.66	(gm/cc)	(analysis	in	mole	%)
	Fe''1.17Mg0.27Fe'''0.87Al0.24Cr0.00Ti0.45O4
	G	=	-109749	(J)	H	=	-82114.3	(J)	S	=	25.51	(J/K)	V	=	2.88	(cc)	Cp	=	12.3	(J/K)
	chromite	hercynite	magnetite	spinel	ulvospinel
	0	-15.08	43.36	27.15	44.57
rhm-oxide	mass	=	0.01	(gm)	density	=	4.64	(gm/cc)	(analysis	in	mole	%)
[truncated: 866 more rows]

## Sheet: PFC2b-Polybaric_stage2_1MPa_FMQ
**********----------**********
Title:	Dummy	Title
T	=	990	(C)	P	=	1	(kbars)	log(10)	f	O2	=	-10.97	delta	HM	=	-5.57	NNO	=	-0.6	QFM	=	0	COH	=	1.93	IW	=	3.8
Constraint	Flags:	fO2	path	=	QFM	Fractionate	Solids
Liquid	mass	=	98.45	(gm)	density	=	2.3	(gm/cc)	viscosity	=	3.55	(log	10	poise)	(analysis	in	wt	%)
	G	=	-1.60736e+06	(J)	H	=	-1.262e+06	(J)	S	=	273.41	(J/K)	V	=	42.77	(cc)	Cp	=	140.43	(J/K)
	SiO2	TiO2	Al2O3	Fe2O3	Cr2O3	FeO	MnO	MgO	NiO	CoO	CaO	Na2O	K2O	P2O5	H2O	CO2	SO3	Cl2O-1	F2O-1
	56.33	0.64	19.21	1.17	0	5.02	0.44	0.89	0	0	4.92	4.68	2.22	0.62	3.86	0	0	0	0
feldspar	mass	=	0.69	(gm)	density	=	2.67	(gm/cc)	(analysis	in	mole	%)
	K0.01Na0.30Ca0.70Al1.70Si2.30O8
	G	=	-11683.1	(J)	H	=	-9694.57	(J)	S	=	1.57	(J/K)	V	=	0.26	(cc)	Cp	=	0.84	(J/K)
	albite	anorthite	sanidine
	29.77	69.5	0.72
water	mass	=	0.86	(gm)	density	=	0.18	(gm/cc)
	H2O
	G	=	-20941.1	(J)	H	=	-9999.42	(J)	S	=	8.66	(J/K)	V	=	4.84	(cc)	Cp	=	2.68	(J/K)
Total	solids	mass	=	1.55	(gm)	density	=	0.3	(gm/cc)
	G	=	-32624.2	(J)	H	=	-19694	(J)	S	=	10.24	(J/K)	V	=	5.1	(cc)	Cp	=	3.52	(J/K)
Summary	of	all	fractionated	phases:	(total	mass	=	0	grams)
Viscosity	of	the	System:	3.75	(log	10	poise)
System	mass	=	100	(gm)	density	=	2.09	(gm/cc)
	G	=	-1.63998e+06	(J)	H	=	-1.28169e+06	(J)	S	=	283.65	(J/K)	V	=	47.86	(cc)	Cp	=	143.95	(J/K)
Oxygen	delta	moles	=	1.26165e-05	delta	grams	=	0.000403712
	G	=	-3.61	(J)	H	=	0.4	(J)	S	=	0	(J/K)	V	=	1.33	(cc)	Cp	=	0	(J/K)
**********----------**********
Title:	Dummy	Title
T	=	980	(C)	P	=	1	(kbars)	log(10)	f	O2	=	-11.13	delta	HM	=	-5.58	NNO	=	-0.59	QFM	=	0	COH	=	1.92	IW	=	3.82
Constraint	Flags:	fO2	path	=	QFM	Fractionate	Solids
Liquid	mass	=	93.88	(gm)	density	=	2.3	(gm/cc)	viscosity	=	3.66	(log	10	poise)	(analysis	in	wt	%)
	G	=	-1.53355e+06	(J)	H	=	-1.20786e+06	(J)	S	=	259.9	(J/K)	V	=	40.9	(cc)	Cp	=	133.67	(J/K)
	SiO2	TiO2	Al2O3	Fe2O3	Cr2O3	FeO	MnO	MgO	NiO	CoO	CaO	Na2O	K2O	P2O5	H2O	CO2	SO3	Cl2O-1	F2O-1
	57.09	0.56	18.89	1.12	0	4.71	0.46	0.91	0	0	4.63	4.76	2.33	0.65	3.89	0	0	0	0
feldspar	mass	=	3.64	(gm)	density	=	2.66	(gm/cc)	(analysis	in	mole	%)
	K0.01Na0.33Ca0.66Al1.66Si2.34O8
	G	=	-61290.9	(J)	H	=	-50946.1	(J)	S	=	8.26	(J/K)	V	=	1.37	(cc)	Cp	=	4.41	(J/K)
	albite	anorthite	sanidine
	32.81	66.37	0.82
spinel	mass	=	0.81	(gm)	density	=	4.74	(gm/cc)	(analysis	in	mole	%)
	Fe''1.19Mg0.16Fe'''1.08Al0.23Cr0.00Ti0.34O4
	G	=	-6504.69	(J)	H	=	-4469.07	(J)	S	=	1.62	(J/K)	V	=	0.17	(cc)	Cp	=	0.74	(J/K)
	chromite	hercynite	magnetite	spinel	ulvospinel
	0	-3.86	54.11	15.59	34.16
water	mass	=	1.01	(gm)	density	=	0.18	(gm/cc)
	H2O
	G	=	-24571.3	(J)	H	=	-11813.2	(J)	S	=	10.18	(J/K)	V	=	5.63	(cc)	Cp	=	3.18	(J/K)
Total	solids	mass	=	5.46	(gm)	density	=	0.76	(gm/cc)
	G	=	-92366.9	(J)	H	=	-67228.3	(J)	S	=	20.06	(J/K)	V	=	7.17	(cc)	Cp	=	8.33	(J/K)
Summary	of	all	fractionated	phases:	(total	mass	=	0.69	grams)
feldspar	mass	=	0.69	(gm)	density	=	2.67	(gm/cc)	(analysis	in	mole	%)
	K0.01Na0.30Ca0.70Al1.70Si2.30O8
	G	=	-11621.3	(J)	H	=	-9664.62	(J)	S	=	1.56	(J/K)	V	=	0.26	(cc)	Cp	=	0.83	(J/K)
	albite	anorthite	sanidine
	29.77	69.5	0.72
Viscosity	of	the	System:	3.98	(log	10	poise)
System	mass	=	100.03	(gm)	density	=	2.07	(gm/cc)
	G	=	-1.63754e+06	(J)	H	=	-1.28476e+06	(J)	S	=	281.52	(J/K)	V	=	48.33	(cc)	Cp	=	142.83	(J/K)
Oxygen	delta	moles	=	0.000709206	delta	grams	=	0.0226937
	G	=	-201.1	(J)	H	=	22.44	(J)	S	=	0.18	(J/K)	V	=	73.89	(cc)	Cp	=	0.03	(J/K)
**********----------**********
Title:	Dummy	Title
T	=	970	(C)	P	=	1	(kbars)	log(10)	f	O2	=	-11.28	delta	HM	=	-5.58	NNO	=	-0.59	QFM	=	0	COH	=	1.9	IW	=	3.83
Constraint	Flags:	fO2	path	=	QFM	Fractionate	Solids
Liquid	mass	=	89.65	(gm)	density	=	2.29	(gm/cc)	viscosity	=	3.77	(log	10	poise)	(analysis	in	wt	%)
	G	=	-1.46507e+06	(J)	H	=	-1.15756e+06	(J)	S	=	247.37	(J/K)	V	=	39.17	(cc)	Cp	=	127.44	(J/K)
	SiO2	TiO2	Al2O3	Fe2O3	Cr2O3	FeO	MnO	MgO	NiO	CoO	CaO	Na2O	K2O	P2O5	H2O	CO2	SO3	Cl2O-1	F2O-1
	57.8	0.49	18.59	1.07	0	4.42	0.48	0.93	0	0	4.36	4.83	2.43	0.68	3.91	0	0	0	0
feldspar	mass	=	3.39	(gm)	density	=	2.66	(gm/cc)	(analysis	in	mole	%)
	K0.01Na0.36Ca0.63Al1.63Si2.37O8
	G	=	-57080.7	(J)	H	=	-47527.1	(J)	S	=	7.68	(J/K)	V	=	1.28	(cc)	Cp	=	4.11	(J/K)
	albite	anorthite	sanidine
	35.98	63.08	0.94
spinel	mass	=	0.72	(gm)	density	=	4.75	(gm/cc)	(analysis	in	mole	%)
	Fe''1.17Mg0.16Fe'''1.12Al0.23Cr0.00Ti0.33O4
	G	=	-5727.96	(J)	H	=	-3944.9	(J)	S	=	1.43	(J/K)	V	=	0.15	(cc)	Cp	=	0.66	(J/K)
	chromite	hercynite	magnetite	spinel	ulvospinel
	0	-3.94	55.81	15.58	32.56
water	mass	=	1.16	(gm)	density	=	0.18	(gm/cc)
	H2O
	G	=	-27964.4	(J)	H	=	-13536.7	(J)	S	=	11.61	(J/K)	V	=	6.37	(cc)	Cp	=	3.64	(J/K)
Total	solids	mass	=	5.27	(gm)	density	=	0.68	(gm/cc)
	G	=	-90773	(J)	H	=	-65008.7	(J)	S	=	20.73	(J/K)	V	=	7.79	(cc)	Cp	=	8.41	(J/K)
Summary	of	all	fractionated	phases:	(total	mass	=	5.13	grams)
feldspar	mass	=	4.32	(gm)	density	=	2.66	(gm/cc)	(analysis	in	mole	%)
	K0.01Na0.32Ca0.67Al1.67Si2.33O8
	G	=	-72768.4	(J)	H	=	-60624.8	(J)	S	=	9.77	(J/K)	V	=	1.62	(cc)	Cp	=	5.23	(J/K)
	albite	anorthite	sanidine
	32.32	66.87	0.81
spinel	mass	=	0.81	(gm)	density	=	4.74	(gm/cc)	(analysis	in	mole	%)
	Fe''1.19Mg0.16Fe'''1.08Al0.23Cr0.00Ti0.34O4
	G	=	-6471.08	(J)	H	=	-4464.5	(J)	S	=	1.61	(J/K)	V	=	0.17	(cc)	Cp	=	0.74	(J/K)
	chromite	hercynite	magnetite	spinel	ulvospinel
	0	-3.86	54.11	15.59	34.16
Viscosity	of	the	System:	4.21	(log	10	poise)
System	mass	=	100.05	(gm)	density	=	2.05	(gm/cc)
	G	=	-1.63509e+06	(J)	H	=	-1.28766e+06	(J)	S	=	279.47	(J/K)	V	=	48.76	(cc)	Cp	=	141.82	(J/K)
Oxygen	delta	moles	=	0.00134584	delta	grams	=	0.0430654
	G	=	-378.25	(J)	H	=	42.11	(J)	S	=	0.34	(J/K)	V	=	139.11	(cc)	Cp	=	0.05	(J/K)
**********----------**********
Title:	Dummy	Title
T	=	960	(C)	P	=	1	(kbars)	log(10)	f	O2	=	-11.44	delta	HM	=	-5.58	NNO	=	-0.59	QFM	=	0	COH	=	1.89	IW	=	3.85
Constraint	Flags:	fO2	path	=	QFM	Fractionate	Solids
Liquid	mass	=	85.71	(gm)	density	=	2.28	(gm/cc)	viscosity	=	3.89	(log	10	poise)	(analysis	in	wt	%)
	G	=	-1.40099e+06	(J)	H	=	-1.1104e+06	(J)	S	=	235.65	(J/K)	V	=	37.54	(cc)	Cp	=	121.62	(J/K)
	SiO2	TiO2	Al2O3	Fe2O3	Cr2O3	FeO	MnO	MgO	NiO	CoO	CaO	Na2O	K2O	P2O5	H2O	CO2	SO3	Cl2O-1	F2O-1
	58.49	0.43	18.29	1.02	0	4.15	0.5	0.95	0	0	4.1	4.89	2.53	0.71	3.93	0	0	0	0
feldspar	mass	=	3.19	(gm)	density	=	2.65	(gm/cc)	(analysis	in	mole	%)
	K0.01Na0.39Ca0.60Al1.60Si2.40O8
	G	=	-53628.2	(J)	H	=	-44728.1	(J)	S	=	7.22	(J/K)	V	=	1.2	(cc)	Cp	=	3.87	(J/K)
	albite	anorthite	sanidine
	39.26	59.66	1.08
spinel	mass	=	0.64	(gm)	density	=	4.76	(gm/cc)	(analysis	in	mole	%)
	Fe''1.15Mg0.16Fe'''1.15Al0.23Cr0.00Ti0.31O4
	G	=	-5060.81	(J)	H	=	-3493.84	(J)	S	=	1.27	(J/K)	V	=	0.13	(cc)	Cp	=	0.59	(J/K)
	chromite	hercynite	magnetite	spinel	ulvospinel
	0	-4	57.56	15.57	30.88
water	mass	=	1.29	(gm)	density	=	0.18	(gm/cc)
	H2O
	G	=	-31165.1	(J)	H	=	-15189.8	(J)	S	=	12.96	(J/K)	V	=	7.04	(cc)	Cp	=	4.1	(J/K)
Total	solids	mass	=	5.12	(gm)	density	=	0.61	(gm/cc)
	G	=	-89854.1	(J)	H	=	-63411.7	(J)	S	=	21.44	(J/K)	V	=	8.38	(cc)	Cp	=	8.55	(J/K)
Summary	of	all	fractionated	phases:	(total	mass	=	9.24	grams)
feldspar	mass	=	7.71	(gm)	density	=	2.66	(gm/cc)	(analysis	in	mole	%)
	K0.01Na0.34Ca0.65Al1.65Si2.35O8
	G	=	-129629	(J)	H	=	-108207	(J)	S	=	17.37	(J/K)	V	=	2.9	(cc)	Cp	=	9.33	(J/K)
	albite	anorthite	sanidine
	33.93	65.2	0.87
spinel	mass	=	1.52	(gm)	density	=	4.75	(gm/cc)	(analysis	in	mole	%)
	Fe''1.18Mg0.16Fe'''1.10Al0.23Cr0.00Ti0.33O4
	G	=	-12151.4	(J)	H	=	-8411.44	(J)	S	=	3.03	(J/K)	V	=	0.32	(cc)	Cp	=	1.4	(J/K)
	chromite	hercynite	magnetite	spinel	ulvospinel
	0	-3.9	54.91	15.58	33.41
Viscosity	of	the	System:	4.44	(log	10	poise)
System	mass	=	100.07	(gm)	density	=	2.04	(gm/cc)
	G	=	-1.63262e+06	(J)	H	=	-1.29043e+06	(J)	S	=	277.5	(J/K)	V	=	49.14	(cc)	Cp	=	140.9	(J/K)
Oxygen	delta	moles	=	0.0019311	delta	grams	=	0.061793
	G	=	-537.89	(J)	H	=	59.73	(J)	S	=	0.48	(J/K)	V	=	197.99	(cc)	Cp	=	0.07	(J/K)
**********----------**********
Title:	Dummy	Title
T	=	950	(C)	P	=	1	(kbars)	log(10)	f	O2	=	-11.6	delta	HM	=	-5.59	NNO	=	-0.58	QFM	=	0	COH	=	1.87	IW	=	3.87
Constraint	Flags:	fO2	path	=	QFM	Fractionate	Solids
Liquid	mass	=	82	(gm)	density	=	2.28	(gm/cc)	viscosity	=	4	(log	10	poise)	(analysis	in	wt	%)
	G	=	-1.34057e+06	(J)	H	=	-1.06583e+06	(J)	S	=	224.61	(J/K)	V	=	35.99	(cc)	Cp	=	116.17	(J/K)
	SiO2	TiO2	Al2O3	Fe2O3	Cr2O3	FeO	MnO	MgO	NiO	CoO	CaO	Na2O	K2O	P2O5	H2O	CO2	SO3	Cl2O-1	F2O-1
	59.14	0.38	18	0.98	0	3.88	0.52	0.98	0	0	3.86	4.93	2.64	0.74	3.94	0	0	0	0
feldspar	mass	=	3.02	(gm)	density	=	2.64	(gm/cc)	(analysis	in	mole	%)
	K0.01Na0.43Ca0.56Al1.56Si2.44O8
	G	=	-50762.9	(J)	H	=	-42410	(J)	S	=	6.83	(J/K)	V	=	1.14	(cc)	Cp	=	3.66	(J/K)
	albite	anorthite	sanidine
	42.61	56.16	1.23
spinel	mass	=	0.57	(gm)	density	=	4.76	(gm/cc)	(analysis	in	mole	%)
	Fe''1.14Mg0.16Fe'''1.19Al0.23Cr0.00Ti0.29O4
	G	=	-4494.54	(J)	H	=	-3110.44	(J)	S	=	1.13	(J/K)	V	=	0.12	(cc)	Cp	=	0.52	(J/K)
	chromite	hercynite	magnetite	spinel	ulvospinel
	0	-4.05	59.35	15.55	29.15
water	mass	=	1.43	(gm)	density	=	0.19	(gm/cc)
	H2O
	G	=	-34208.1	(J)	H	=	-16787.7	(J)	S	=	14.24	(J/K)	V	=	7.67	(cc)	Cp	=	4.54	(J/K)
Total	solids	mass	=	5.02	(gm)	density	=	0.56	(gm/cc)
	G	=	-89465.5	(J)	H	=	-62308.1	(J)	S	=	22.2	(J/K)	V	=	8.93	(cc)	Cp	=	8.72	(J/K)
Summary	of	all	fractionated	phases:	(total	mass	=	13.06	grams)
feldspar	mass	=	10.9	(gm)	density	=	2.66	(gm/cc)	(analysis	in	mole	%)
	K0.01Na0.35Ca0.64Al1.64Si2.36O8
	G	=	-182967	(J)	H	=	-153028	(J)	S	=	24.48	(J/K)	V	=	4.1	(cc)	Cp	=	13.17	(J/K)
	albite	anorthite	sanidine
	35.5	63.58	0.93
spinel	mass	=	2.16	(gm)	density	=	4.75	(gm/cc)	(analysis	in	mole	%)
	Fe''1.17Mg0.16Fe'''1.11Al0.23Cr0.00Ti0.33O4
	G	=	-17152.1	(J)	H	=	-11913.2	(J)	S	=	4.28	(J/K)	V	=	0.45	(cc)	Cp	=	1.98	(J/K)
	chromite	hercynite	magnetite	spinel	ulvospinel
	0	-3.93	55.69	15.58	32.66
Viscosity	of	the	System:	4.68	(log	10	poise)
System	mass	=	100.08	(gm)	density	=	2.02	(gm/cc)
	G	=	-1.63015e+06	(J)	H	=	-1.29308e+06	(J)	S	=	275.58	(J/K)	V	=	49.48	(cc)	Cp	=	140.04	(J/K)
Oxygen	delta	moles	=	0.00247167	delta	grams	=	0.0790904
	G	=	-682.25	(J)	H	=	75.57	(J)	S	=	0.62	(J/K)	V	=	251.36	(cc)	Cp	=	0.09	(J/K)
**********----------**********
Title:	Dummy	Title
T	=	940	(C)	P	=	1	(kbars)	log(10)	f	O2	=	-11.77	delta	HM	=	-5.59	NNO	=	-0.58	QFM	=	0	COH	=	1.86	IW	=	3.88
Constraint	Flags:	fO2	path	=	QFM	Fractionate	Solids
Liquid	mass	=	78.49	(gm)	density	=	2.27	(gm/cc)	viscosity	=	4.11	(log	10	poise)	(analysis	in	wt	%)
	G	=	-1.28326e+06	(J)	H	=	-1.02344e+06	(J)	S	=	214.16	(J/K)	V	=	34.52	(cc)	Cp	=	111.01	(J/K)
	SiO2	TiO2	Al2O3	Fe2O3	Cr2O3	FeO	MnO	MgO	NiO	CoO	CaO	Na2O	K2O	P2O5	H2O	CO2	SO3	Cl2O-1	F2O-1
	59.77	0.33	17.71	0.93	0	3.63	0.55	1	0	0	3.63	4.96	2.75	0.78	3.96	0	0	0	0
feldspar	mass	=	2.88	(gm)	density	=	2.64	(gm/cc)	(analysis	in	mole	%)
	K0.01Na0.46Ca0.53Al1.53Si2.47O8
	G	=	-48350.2	(J)	H	=	-40462.8	(J)	S	=	6.5	(J/K)	V	=	1.09	(cc)	Cp	=	3.5	(J/K)
	albite	anorthite	sanidine
	45.97	52.62	1.41
spinel	mass	=	0.51	(gm)	density	=	4.77	(gm/cc)	(analysis	in	mole	%)
	Fe''1.12Mg0.16Fe'''1.22Al0.23Cr0.00Ti0.27O4
	G	=	-4008.32	(J)	H	=	-2780.77	(J)	S	=	1.01	(J/K)	V	=	0.11	(cc)	Cp	=	0.47	(J/K)
	chromite	hercynite	magnetite	spinel	ulvospinel
	0	-4.09	61.16	15.54	27.38
water	mass	=	1.55	(gm)	density	=	0.19	(gm/cc)
	H2O
	G	=	-37119.9	(J)	H	=	-18342.3	(J)	S	=	15.48	(J/K)	V	=	8.25	(cc)	Cp	=	4.97	(J/K)
Total	solids	mass	=	4.95	(gm)	density	=	0.52	(gm/cc)
	G	=	-89478.4	(J)	H	=	-61585.9	(J)	S	=	22.99	(J/K)	V	=	9.45	(cc)	Cp	=	8.93	(J/K)
Summary	of	all	fractionated	phases:	(total	mass	=	16.65	grams)
feldspar	mass	=	13.92	(gm)	density	=	2.66	(gm/cc)	(analysis	in	mole	%)
	K0.01Na0.37Ca0.62Al1.62Si2.38O8
	G	=	-233372	(J)	H	=	-195568	(J)	S	=	31.16	(J/K)	V	=	5.24	(cc)	Cp	=	16.81	(J/K)
	albite	anorthite	sanidine
	37.05	61.96	0.99
spinel	mass	=	2.73	(gm)	density	=	4.76	(gm/cc)	(analysis	in	mole	%)
	Fe''1.16Mg0.16Fe'''1.13Al0.23Cr0.00Ti0.32O4
	G	=	-21575.6	(J)	H	=	-15036.8	(J)	S	=	5.39	(J/K)	V	=	0.57	(cc)	Cp	=	2.5	(J/K)
	chromite	hercynite	magnetite	spinel	ulvospinel
	0	-3.95	56.45	15.57	31.93
Viscosity	of	the	System:	4.93	(log	10	poise)
System	mass	=	100.1	(gm)	density	=	2.01	(gm/cc)
	G	=	-1.62768e+06	(J)	H	=	-1.29564e+06	(J)	S	=	273.71	(J/K)	V	=	49.79	(cc)	Cp	=	139.26	(J/K)
Oxygen	delta	moles	=	0.0029726	delta	grams	=	0.0951197
	G	=	-813.08	(J)	H	=	89.83	(J)	S	=	0.74	(J/K)	V	=	299.83	(cc)	Cp	=	0.11	(J/K)
**********----------**********
Title:	Dummy	Title
T	=	930	(C)	P	=	1	(kbars)	log(10)	f	O2	=	-11.93	delta	HM	=	-5.59	NNO	=	-0.57	QFM	=	0	COH	=	1.85	IW	=	3.9
Constraint	Flags:	fO2	path	=	QFM	Fractionate	Solids
Liquid	mass	=	74.69	(gm)	density	=	2.27	(gm/cc)	viscosity	=	4.23	(log	10	poise)	(analysis	in	wt	%)
	G	=	-1.22103e+06	(J)	H	=	-976835	(J)	S	=	202.96	(J/K)	V	=	32.92	(cc)	Cp	=	105.4	(J/K)
	SiO2	TiO2	Al2O3	Fe2O3	Cr2O3	FeO	MnO	MgO	NiO	CoO	CaO	Na2O	K2O	P2O5	H2O	CO2	SO3	Cl2O-1	F2O-1
	60.4	0.29	17.46	0.89	0	3.38	0.58	0.96	0	0	3.41	4.98	2.88	0.82	3.97	0	0	0	0
orthopyroxene	mass	=	0.27	(gm)	density	=	3.42	(gm/cc)	(analysis	in	mole	%)
	opx	Na0.00Ca0.04Fe''0.70Mg1.20Fe'''0.02Ti0.00Al0.11Si1.93O6
	G	=	-3796.96	(J)	H	=	-3113.2	(J)	S	=	0.57	(J/K)	V	=	0.08	(cc)	Cp	=	0.31	(J/K)
	diopside	clinoenstatit	hedenbergite	alumino-buffo	buffonite	essenite	jadeite
	-72.51	95.96	69.59	4.55	-4.27	6.52	0.16
feldspar	mass	=	2.98	(gm)	density	=	2.63	(gm/cc)	(analysis	in	mole	%)
	K0.02Na0.49Ca0.49Al1.49Si2.51O8
	G	=	-49922.2	(J)	H	=	-41848.7	(J)	S	=	6.71	(J/K)	V	=	1.13	(cc)	Cp	=	3.61	(J/K)
	albite	anorthite	sanidine
	49.49	48.88	1.63
spinel	mass	=	0.43	(gm)	density	=	4.78	(gm/cc)	(analysis	in	mole	%)
	Fe''1.11Mg0.15Fe'''1.26Al0.23Cr0.00Ti0.26O4
	G	=	-3317.94	(J)	H	=	-2306.03	(J)	S	=	0.84	(J/K)	V	=	0.09	(cc)	Cp	=	0.39	(J/K)
	chromite	hercynite	magnetite	spinel	ulvospinel
	0	-3.74	62.77	14.99	25.97
water	mass	=	1.7	(gm)	density	=	0.19	(gm/cc)
	H2O
	G	=	-40302.7	(J)	H	=	-20052.6	(J)	S	=	16.83	(J/K)	V	=	8.88	(cc)	Cp	=	5.44	(J/K)
Total	solids	mass	=	5.37	(gm)	density	=	0.53	(gm/cc)
	G	=	-97339.7	(J)	H	=	-67320.5	(J)	S	=	24.95	(J/K)	V	=	10.19	(cc)	Cp	=	9.77	(J/K)
Summary	of	all	fractionated	phases:	(total	mass	=	20.05	grams)
feldspar	mass	=	16.8	(gm)	density	=	2.65	(gm/cc)	(analysis	in	mole	%)
	K0.01Na0.39Ca0.60Al1.60Si2.40O8
	G	=	-281303	(J)	H	=	-236196	(J)	S	=	37.49	(J/K)	V	=	6.33	(cc)	Cp	=	20.28	(J/K)
	albite	anorthite	sanidine
	38.58	60.35	1.07
spinel	mass	=	3.24	(gm)	density	=	4.76	(gm/cc)	(analysis	in	mole	%)
	Fe''1.16Mg0.16Fe'''1.14Al0.23Cr0.00Ti0.31O4
	G	=	-25503.2	(J)	H	=	-17835.4	(J)	S	=	6.37	(J/K)	V	=	0.68	(cc)	Cp	=	2.97	(J/K)
	chromite	hercynite	magnetite	spinel	ulvospinel
	0	-3.97	57.19	15.57	31.21
Viscosity	of	the	System:	5.23	(log	10	poise)
System	mass	=	100.11	(gm)	density	=	2	(gm/cc)
	G	=	-1.62517e+06	(J)	H	=	-1.29819e+06	(J)	S	=	271.78	(J/K)	V	=	50.12	(cc)	Cp	=	138.42	(J/K)
Oxygen	delta	moles	=	0.00337145	delta	grams	=	0.107882
	G	=	-913.74	(J)	H	=	100.68	(J)	S	=	0.84	(J/K)	V	=	337.26	(cc)	Cp	=	0.12	(J/K)
**********----------**********
Title:	Dummy	Title
T	=	920	(C)	P	=	1	(kbars)	log(10)	f	O2	=	-12.1	delta	HM	=	-5.6	NNO	=	-0.57	QFM	=	0	COH	=	1.83	IW	=	3.92
Constraint	Flags:	fO2	path	=	QFM	Fractionate	Solids
Liquid	mass	=	70.68	(gm)	density	=	2.26	(gm/cc)	viscosity	=	4.35	(log	10	poise)	(analysis	in	wt	%)
	G	=	-1.15531e+06	(J)	H	=	-927115	(J)	S	=	191.25	(J/K)	V	=	31.22	(cc)	Cp	=	99.49	(J/K)
	SiO2	TiO2	Al2O3	Fe2O3	Cr2O3	FeO	MnO	MgO	NiO	CoO	CaO	Na2O	K2O	P2O5	H2O	CO2	SO3	Cl2O-1	F2O-1
	61.03	0.26	17.22	0.83	0	3.11	0.61	0.86	0	0	3.19	5	3.03	0.86	3.98	0	0	0	0
orthopyroxene	mass	=	0.48	(gm)	density	=	3.43	(gm/cc)	(analysis	in	mole	%)
	opx	Na0.00Ca0.04Fe''0.72Mg1.17Fe'''0.02Ti0.00Al0.11Si1.93O6
	G	=	-6875.65	(J)	H	=	-5646.36	(J)	S	=	1.03	(J/K)	V	=	0.14	(cc)	Cp	=	0.57	(J/K)
	diopside	clinoenstatit	hedenbergite	alumino-buffo	buffonite	essenite	jadeite
	-75.33	96.32	72.1	4.53	-4.28	6.51	0.16
feldspar	mass	=	3.05	(gm)	density	=	2.62	(gm/cc)	(analysis	in	mole	%)
	K0.02Na0.53Ca0.45Al1.45Si2.55O8
	G	=	-50882	(J)	H	=	-42724.5	(J)	S	=	6.84	(J/K)	V	=	1.16	(cc)	Cp	=	3.69	(J/K)
	albite	anorthite	sanidine
	53.11	44.98	1.9
spinel	mass	=	0.35	(gm)	density	=	4.79	(gm/cc)	(analysis	in	mole	%)
	Fe''1.11Mg0.14Fe'''1.28Al0.22Cr0.00Ti0.25O4
	G	=	-2638.6	(J)	H	=	-1836.33	(J)	S	=	0.67	(J/K)	V	=	0.07	(cc)	Cp	=	0.32	(J/K)
	chromite	hercynite	magnetite	spinel	ulvospinel
	0	-3.04	64.12	13.95	24.98
water	mass	=	1.85	(gm)	density	=	0.19	(gm/cc)
	H2O
	G	=	-43690.4	(J)	H	=	-21888.7	(J)	S	=	18.27	(J/K)	V	=	9.55	(cc)	Cp	=	5.96	(J/K)
Total	solids	mass	=	5.72	(gm)	density	=	0.52	(gm/cc)
	G	=	-104087	(J)	H	=	-72095.9	(J)	S	=	26.81	(J/K)	V	=	10.92	(cc)	Cp	=	10.54	(J/K)
Summary	of	all	fractionated	phases:	(total	mass	=	23.72	grams)
orthopyroxene	mass	=	0.26	(gm)	density	=	3.42	(gm/cc)	(analysis	in	mole	%)
	opx	Na0.00Ca0.04Fe''0.70Mg1.20Fe'''0.02Ti0.00Al0.11Si1.93O6
	G	=	-3759.3	(J)	H	=	-3090.04	(J)	S	=	0.56	(J/K)	V	=	0.08	(cc)	Cp	=	0.31	(J/K)
	diopside	clinoenstatit	hedenbergite	alumino-buffo	buffonite	essenite	jadeite
	-72.51	95.96	69.59	4.55	-4.27	6.52	0.16
feldspar	mass	=	19.78	(gm)	density	=	2.65	(gm/cc)	(analysis	in	mole	%)
	K0.01Na0.40Ca0.59Al1.59Si2.41O8
	G	=	-330740	(J)	H	=	-278244	(J)	S	=	44	(J/K)	V	=	7.47	(cc)	Cp	=	23.87	(J/K)
	albite	anorthite	sanidine
	40.24	58.61	1.15
spinel	mass	=	3.67	(gm)	density	=	4.76	(gm/cc)	(analysis	in	mole	%)
	Fe''1.15Mg0.16Fe'''1.16Al0.23Cr0.00Ti0.31O4
	G	=	-28732.5	(J)	H	=	-20163.3	(J)	S	=	7.18	(J/K)	V	=	0.77	(cc)	Cp	=	3.36	(J/K)
	chromite	hercynite	magnetite	spinel	ulvospinel
	0	-3.95	57.84	15.5	30.6
Viscosity	of	the	System:	5.6	(log	10	poise)
System	mass	=	100.12	(gm)	density	=	1.98	(gm/cc)
	G	=	-1.62263e+06	(J)	H	=	-1.30071e+06	(J)	S	=	269.81	(J/K)	V	=	50.46	(cc)	Cp	=	137.56	(J/K)
Oxygen	delta	moles	=	0.00366362	delta	grams	=	0.117231
	G	=	-983.77	(J)	H	=	108.1	(J)	S	=	0.92	(J/K)	V	=	363.44	(cc)	Cp	=	0.13	(J/K)
**********----------**********
Title:	Dummy	Title
T	=	910	(C)	P	=	1	(kbars)	log(10)	f	O2	=	-12.28	delta	HM	=	-5.6	NNO	=	-0.56	QFM	=	0	COH	=	1.81	IW	=	3.93
Constraint	Flags:	fO2	path	=	QFM	Fractionate	Solids
Liquid	mass	=	66.87	(gm)	density	=	2.26	(gm/cc)	viscosity	=	4.49	(log	10	poise)	(analysis	in	wt	%)
	G	=	-1.09273e+06	(J)	H	=	-879603	(J)	S	=	180.13	(J/K)	V	=	29.6	(cc)	Cp	=	93.84	(J/K)
	SiO2	TiO2	Al2O3	Fe2O3	Cr2O3	FeO	MnO	MgO	NiO	CoO	CaO	Na2O	K2O	P2O5	H2O	CO2	SO3	Cl2O-1	F2O-1
	61.69	0.24	17.02	0.78	0	2.87	0.64	0.77	0	0	2.94	5.01	3.18	0.87	3.99	0	0	0	0
orthopyroxene	mass	=	0.42	(gm)	density	=	3.44	(gm/cc)	(analysis	in	mole	%)
	opx	Na0.00Ca0.03Fe''0.75Mg1.15Fe'''0.02Ti0.00Al0.11Si1.93O6
	G	=	-5978.15	(J)	H	=	-4917.02	(J)	S	=	0.9	(J/K)	V	=	0.12	(cc)	Cp	=	0.5	(J/K)
	diopside	clinoenstatit	hedenbergite	alumino-buffo	buffonite	essenite	jadeite
	-78.24	96.68	74.67	4.51	-4.3	6.51	0.16
feldspar	mass	=	2.89	(gm)	density	=	2.62	(gm/cc)	(analysis	in	mole	%)
	K0.02Na0.57Ca0.41Al1.41Si2.59O8
	G	=	-48150	(J)	H	=	-40498.4	(J)	S	=	6.47	(J/K)	V	=	1.1	(cc)	Cp	=	3.5	(J/K)
	albite	anorthite	sanidine
	56.69	41.07	2.23
spinel	mass	=	0.3	(gm)	density	=	4.81	(gm/cc)	(analysis	in	mole	%)
	Fe''1.11Mg0.13Fe'''1.31Al0.21Cr0.00Ti0.24O4
	G	=	-2287.66	(J)	H	=	-1594.56	(J)	S	=	0.59	(J/K)	V	=	0.06	(cc)	Cp	=	0.28	(J/K)
	chromite	hercynite	magnetite	spinel	ulvospinel
	0	-2.42	65.39	12.99	24.04
apatite	mass	=	0.07	(gm)	density	=	3.06	(gm/cc)
	Ca5(PO4)3OH
	G	=	-1069.9	(J)	H	=	-888.23	(J)	S	=	0.15	(J/K)	V	=	0.02	(cc)	Cp	=	0.08	(J/K)
water	mass	=	1.99	(gm)	density	=	0.2	(gm/cc)
	H2O
	G	=	-46929.7	(J)	H	=	-23674.6	(J)	S	=	19.66	(J/K)	V	=	10.16	(cc)	Cp	=	6.47	(J/K)
Total	solids	mass	=	5.68	(gm)	density	=	0.49	(gm/cc)
	G	=	-104415	(J)	H	=	-71572.8	(J)	S	=	27.76	(J/K)	V	=	11.48	(cc)	Cp	=	10.82	(J/K)
Summary	of	all	fractionated	phases:	(total	mass	=	27.59	grams)
orthopyroxene	mass	=	0.75	(gm)	density	=	3.42	(gm/cc)	(analysis	in	mole	%)
	opx	Na0.00Ca0.04Fe''0.71Mg1.18Fe'''0.02Ti0.00Al0.11Si1.93O6
	G	=	-10587.2	(J)	H	=	-8718.96	(J)	S	=	1.58	(J/K)	V	=	0.22	(cc)	Cp	=	0.88	(J/K)
	diopside	clinoenstatit	hedenbergite	alumino-buffo	buffonite	essenite	jadeite
	-74.33	96.19	71.21	4.53	-4.28	6.51	0.16
feldspar	mass	=	22.83	(gm)	density	=	2.65	(gm/cc)	(analysis	in	mole	%)
	K0.01Na0.42Ca0.57Al1.57Si2.43O8
	G	=	-381073	(J)	H	=	-321206	(J)	S	=	50.6	(J/K)	V	=	8.62	(cc)	Cp	=	27.52	(J/K)
	albite	anorthite	sanidine
	41.96	56.78	1.25
spinel	mass	=	4.02	(gm)	density	=	4.77	(gm/cc)	(analysis	in	mole	%)
	Fe''1.15Mg0.15Fe'''1.17Al0.23Cr0.00Ti0.30O4
	G	=	-31276.2	(J)	H	=	-22024.6	(J)	S	=	7.82	(J/K)	V	=	0.84	(cc)	Cp	=	3.67	(J/K)
	chromite	hercynite	magnetite	spinel	ulvospinel
	0	-3.87	58.38	15.37	30.13
Viscosity	of	the	System:	6.05	(log	10	poise)
System	mass	=	100.13	(gm)	density	=	1.97	(gm/cc)
	G	=	-1.62008e+06	(J)	H	=	-1.30312e+06	(J)	S	=	267.89	(J/K)	V	=	50.76	(cc)	Cp	=	136.73	(J/K)
Oxygen	delta	moles	=	0.00391737	delta	grams	=	0.125351
	G	=	-1042.12	(J)	H	=	114.19	(J)	S	=	0.98	(J/K)	V	=	385.35	(cc)	Cp	=	0.14	(J/K)
**********----------**********
Title:	Dummy	Title
T	=	900	(C)	P	=	1	(kbars)	log(10)	f	O2	=	-12.45	delta	HM	=	-5.6	NNO	=	-0.56	QFM	=	0	COH	=	1.8	IW	=	3.95
Constraint	Flags:	fO2	path	=	QFM	Fractionate	Solids
Liquid	mass	=	63.32	(gm)	density	=	2.25	(gm/cc)	viscosity	=	4.62	(log	10	poise)	(analysis	in	wt	%)
	G	=	-1.03439e+06	(J)	H	=	-835214	(J)	S	=	169.78	(J/K)	V	=	28.08	(cc)	Cp	=	88.62	(J/K)
	SiO2	TiO2	Al2O3	Fe2O3	Cr2O3	FeO	MnO	MgO	NiO	CoO	CaO	Na2O	K2O	P2O5	H2O	CO2	SO3	Cl2O-1	F2O-1
	62.31	0.22	16.81	0.74	0	2.64	0.68	0.69	0	0	2.72	4.99	3.34	0.88	3.99	0	0	0	0
orthopyroxene	mass	=	0.36	(gm)	density	=	3.45	(gm/cc)	(analysis	in	mole	%)
	opx	Na0.00Ca0.03Fe''0.77Mg1.13Fe'''0.02Ti0.00Al0.11Si1.93O6
	G	=	-5076.75	(J)	H	=	-4182.17	(J)	S	=	0.76	(J/K)	V	=	0.11	(cc)	Cp	=	0.42	(J/K)
	diopside	clinoenstatit	hedenbergite	alumino-buffo	buffonite	essenite	jadeite
	-81.18	97.04	77.27	4.51	-4.32	6.52	0.16
feldspar	mass	=	2.75	(gm)	density	=	2.61	(gm/cc)	(analysis	in	mole	%)
	K0.03Na0.60Ca0.37Al1.37Si2.63O8
	G	=	-45763.1	(J)	H	=	-38556.2	(J)	S	=	6.14	(J/K)	V	=	1.05	(cc)	Cp	=	3.33	(J/K)
	albite	anorthite	sanidine
	60.14	37.23	2.63
spinel	mass	=	0.26	(gm)	density	=	4.82	(gm/cc)	(analysis	in	mole	%)
	Fe''1.11Mg0.12Fe'''1.33Al0.20Cr0.00Ti0.23O4
	G	=	-1978.58	(J)	H	=	-1381.5	(J)	S	=	0.51	(J/K)	V	=	0.05	(cc)	Cp	=	0.24	(J/K)
	chromite	hercynite	magnetite	spinel	ulvospinel
	0	-1.87	66.62	12.11	23.13
apatite	mass	=	0.05	(gm)	density	=	3.06	(gm/cc)
	Ca5(PO4)3OH
	G	=	-770.24	(J)	H	=	-640.95	(J)	S	=	0.11	(J/K)	V	=	0.02	(cc)	Cp	=	0.06	(J/K)
water	mass	=	2.13	(gm)	density	=	0.2	(gm/cc)
	H2O
	G	=	-49981	(J)	H	=	-25389.2	(J)	S	=	20.96	(J/K)	V	=	10.73	(cc)	Cp	=	6.96	(J/K)
Total	solids	mass	=	5.56	(gm)	density	=	0.46	(gm/cc)
	G	=	-103570	(J)	H	=	-70150	(J)	S	=	28.49	(J/K)	V	=	11.96	(cc)	Cp	=	11.01	(J/K)
Summary	of	all	fractionated	phases:	(total	mass	=	31.26	grams)
orthopyroxene	mass	=	1.17	(gm)	density	=	3.43	(gm/cc)	(analysis	in	mole	%)
	opx	Na0.00Ca0.03Fe''0.72Mg1.17Fe'''0.02Ti0.00Al0.11Si1.93O6
	G	=	-16508.9	(J)	H	=	-13623.5	(J)	S	=	2.46	(J/K)	V	=	0.34	(cc)	Cp	=	1.37	(J/K)
	diopside	clinoenstatit	hedenbergite	alumino-buffo	buffonite	essenite	jadeite
	-75.74	96.37	72.46	4.53	-4.28	6.51	0.16
feldspar	mass	=	25.71	(gm)	density	=	2.64	(gm/cc)	(analysis	in	mole	%)
	K0.01Na0.44Ca0.55Al1.55Si2.45O8
	G	=	-428612	(J)	H	=	-361975	(J)	S	=	56.8	(J/K)	V	=	9.72	(cc)	Cp	=	30.98	(J/K)
	albite	anorthite	sanidine
	43.63	55.01	1.36
spinel	mass	=	4.32	(gm)	density	=	4.77	(gm/cc)	(analysis	in	mole	%)
	Fe''1.15Mg0.15Fe'''1.18Al0.23Cr0.00Ti0.30O4
	G	=	-33463.6	(J)	H	=	-23647	(J)	S	=	8.37	(J/K)	V	=	0.9	(cc)	Cp	=	3.94	(J/K)
	chromite	hercynite	magnetite	spinel	ulvospinel
	0	-3.77	58.86	15.2	29.7
apatite	mass	=	0.07	(gm)	density	=	3.06	(gm/cc)
	Ca5(PO4)3OH
	G	=	-993.47	(J)	H	=	-826.72	(J)	S	=	0.14	(J/K)	V	=	0.02	(cc)	Cp	=	0.08	(J/K)
Viscosity	of	the	System:	6.62	(log	10	poise)
System	mass	=	100.14	(gm)	density	=	1.96	(gm/cc)
	G	=	-1.61753e+06	(J)	H	=	-1.30544e+06	(J)	S	=	266.03	(J/K)	V	=	51.03	(cc)	Cp	=	136	(J/K)
Oxygen	delta	moles	=	0.00414073	delta	grams	=	0.132498
	G	=	-1091.22	(J)	H	=	119.23	(J)	S	=	1.03	(J/K)	V	=	403.88	(cc)	Cp	=	0.15	(J/K)
**********----------**********
Title:	Dummy	Title
T	=	890	(C)	P	=	1	(kbars)	log(10)	f	O2	=	-12.63	delta	HM	=	-5.61	NNO	=	-0.56	QFM	=	0	COH	=	1.78	IW	=	3.97
Constraint	Flags:	fO2	path	=	QFM	Fractionate	Solids
Liquid	mass	=	59.98	(gm)	density	=	2.25	(gm/cc)	viscosity	=	4.75	(log	10	poise)	(analysis	in	wt	%)
	G	=	-979352	(J)	H	=	-793226	(J)	S	=	160.02	(J/K)	V	=	26.64	(cc)	Cp	=	83.71	(J/K)
	SiO2	TiO2	Al2O3	Fe2O3	Cr2O3	FeO	MnO	MgO	NiO	CoO	CaO	Na2O	K2O	P2O5	H2O	CO2	SO3	Cl2O-1	F2O-1
	62.89	0.2	16.6	0.69	0	2.42	0.72	0.61	0	0	2.53	4.94	3.5	0.91	3.99	0	0	0	0
orthopyroxene	mass	=	0.31	(gm)	density	=	3.46	(gm/cc)	(analysis	in	mole	%)
	opx	Na0.00Ca0.02Fe''0.80Mg1.11Fe'''0.02Ti0.00Al0.11Si1.93O6
	G	=	-4357.49	(J)	H	=	-3595.3	(J)	S	=	0.66	(J/K)	V	=	0.09	(cc)	Cp	=	0.37	(J/K)
	diopside	clinoenstatit	hedenbergite	alumino-buffo	buffonite	essenite	jadeite
	-84.17	97.39	79.9	4.52	-4.35	6.54	0.16
feldspar	mass	=	2.64	(gm)	density	=	2.6	(gm/cc)	(analysis	in	mole	%)
	K0.03Na0.63Ca0.33Al1.33Si2.67O8
	G	=	-43822.9	(J)	H	=	-36984.8	(J)	S	=	5.88	(J/K)	V	=	1.01	(cc)	Cp	=	3.2	(J/K)
	albite	anorthite	sanidine
	63.45	33.45	3.1
spinel	mass	=	0.23	(gm)	density	=	4.83	(gm/cc)	(analysis	in	mole	%)
	Fe''1.11Mg0.11Fe'''1.36Al0.20Cr0.00Ti0.22O4
	G	=	-1716.85	(J)	H	=	-1201.02	(J)	S	=	0.44	(J/K)	V	=	0.05	(cc)	Cp	=	0.21	(J/K)
	chromite	hercynite	magnetite	spinel	ulvospinel
	0	-1.37	67.81	11.3	22.26
apatite	mass	=	0.04	(gm)	density	=	3.06	(gm/cc)
	Ca5(PO4)3OH
	G	=	-606.75	(J)	H	=	-506.09	(J)	S	=	0.09	(J/K)	V	=	0.01	(cc)	Cp	=	0.05	(J/K)
water	mass	=	2.26	(gm)	density	=	0.2	(gm/cc)
	H2O
	G	=	-52885.5	(J)	H	=	-27051.8	(J)	S	=	22.21	(J/K)	V	=	11.24	(cc)	Cp	=	7.44	(J/K)
Total	solids	mass	=	5.48	(gm)	density	=	0.44	(gm/cc)
	G	=	-103389	(J)	H	=	-69339	(J)	S	=	29.28	(J/K)	V	=	12.41	(cc)	Cp	=	11.26	(J/K)
Summary	of	all	fractionated	phases:	(total	mass	=	34.68	grams)
orthopyroxene	mass	=	1.53	(gm)	density	=	3.44	(gm/cc)	(analysis	in	mole	%)
	opx	Na0.00Ca0.03Fe''0.74Mg1.16Fe'''0.02Ti0.00Al0.11Si1.93O6
	G	=	-21522	(J)	H	=	-17797.5	(J)	S	=	3.2	(J/K)	V	=	0.44	(cc)	Cp	=	1.79	(J/K)
	diopside	clinoenstatit	hedenbergite	alumino-buffo	buffonite	essenite	jadeite
	-77.02	96.53	73.59	4.52	-4.29	6.52	0.16
feldspar	mass	=	28.46	(gm)	density	=	2.64	(gm/cc)	(analysis	in	mole	%)
	K0.01Na0.45Ca0.53Al1.53Si2.47O8
	G	=	-473706	(J)	H	=	-400835	(J)	S	=	62.65	(J/K)	V	=	10.77	(cc)	Cp	=	34.27	(J/K)
	albite	anorthite	sanidine
	45.24	53.28	1.49
spinel	mass	=	4.58	(gm)	density	=	4.78	(gm/cc)	(analysis	in	mole	%)
	Fe''1.14Mg0.15Fe'''1.19Al0.23Cr0.00Ti0.29O4
	G	=	-35337.4	(J)	H	=	-25058.7	(J)	S	=	8.84	(J/K)	V	=	0.96	(cc)	Cp	=	4.17	(J/K)
	chromite	hercynite	magnetite	spinel	ulvospinel
	0	-3.66	59.3	15.03	29.33
apatite	mass	=	0.11	(gm)	density	=	3.06	(gm/cc)
	Ca5(PO4)3OH
	G	=	-1686.41	(J)	H	=	-1406.63	(J)	S	=	0.24	(J/K)	V	=	0.04	(cc)	Cp	=	0.13	(J/K)
Viscosity	of	the	System:	7.56	(log	10	poise)
System	mass	=	100.14	(gm)	density	=	1.95	(gm/cc)
	G	=	-1.61499e+06	(J)	H	=	-1.30766e+06	(J)	S	=	264.22	(J/K)	V	=	51.26	(cc)	Cp	=	135.34	(J/K)
Oxygen	delta	moles	=	0.00433689	delta	grams	=	0.138775
	G	=	-1132.12	(J)	H	=	123.34	(J)	S	=	1.08	(J/K)	V	=	419.41	(cc)	Cp	=	0.15	(J/K)
**********----------**********
Title:	Dummy	Title
T	=	880	(C)	P	=	1	(kbars)	log(10)	f	O2	=	-12.81	delta	HM	=	-5.61	NNO	=	-0.55	QFM	=	0	COH	=	1.77	IW	=	3.99
Constraint	Flags:	fO2	path	=	QFM	Fractionate	Solids
Liquid	mass	=	56.81	(gm)	density	=	2.25	(gm/cc)	viscosity	=	4.88	(log	10	poise)	(analysis	in	wt	%)
	G	=	-927017	(J)	H	=	-753169	(J)	S	=	150.76	(J/K)	V	=	25.26	(cc)	Cp	=	79.08	(J/K)
	SiO2	TiO2	Al2O3	Fe2O3	Cr2O3	FeO	MnO	MgO	NiO	CoO	CaO	Na2O	K2O	P2O5	H2O	CO2	SO3	Cl2O-1	F2O-1
	63.43	0.18	16.39	0.64	0	2.22	0.76	0.55	0	0	2.36	4.87	3.67	0.94	3.99	0	0	0	0
orthopyroxene	mass	=	0.27	(gm)	density	=	3.47	(gm/cc)	(analysis	in	mole	%)
	opx	Na0.00Ca0.02Fe''0.83Mg1.08Fe'''0.02Ti0.00Al0.11Si1.93O6
	G	=	-3763.35	(J)	H	=	-3109.97	(J)	S	=	0.57	(J/K)	V	=	0.08	(cc)	Cp	=	0.32	(J/K)
	diopside	clinoenstatit	hedenbergite	alumino-buffo	buffonite	essenite	jadeite
	-87.18	97.73	82.57	4.53	-4.38	6.57	0.16
feldspar	mass	=	2.55	(gm)	density	=	2.6	(gm/cc)	(analysis	in	mole	%)
	K0.04Na0.67Ca0.30Al1.30Si2.70O8
	G	=	-42284	(J)	H	=	-35747.8	(J)	S	=	5.67	(J/K)	V	=	0.98	(cc)	Cp	=	3.09	(J/K)
	albite	anorthite	sanidine
	66.58	29.73	3.68
spinel	mass	=	0.2	(gm)	density	=	4.84	(gm/cc)	(analysis	in	mole	%)
	Fe''1.11Mg0.11Fe'''1.38Al0.19Cr0.00Ti0.21O4
	G	=	-1492.44	(J)	H	=	-1046.16	(J)	S	=	0.39	(J/K)	V	=	0.04	(cc)	Cp	=	0.18	(J/K)
	chromite	hercynite	magnetite	spinel	ulvospinel
	0	-0.92	68.94	10.55	21.43
apatite	mass	=	0.03	(gm)	density	=	3.06	(gm/cc)
	Ca5(PO4)3OH
	G	=	-453.75	(J)	H	=	-379.36	(J)	S	=	0.06	(J/K)	V	=	0.01	(cc)	Cp	=	0.03	(J/K)
water	mass	=	2.39	(gm)	density	=	0.2	(gm/cc)
	H2O
	G	=	-55671.7	(J)	H	=	-28675.8	(J)	S	=	23.41	(J/K)	V	=	11.72	(cc)	Cp	=	7.92	(J/K)
Total	solids	mass	=	5.45	(gm)	density	=	0.42	(gm/cc)
	G	=	-103665	(J)	H	=	-68959.1	(J)	S	=	30.1	(J/K)	V	=	12.83	(cc)	Cp	=	11.55	(J/K)
Summary	of	all	fractionated	phases:	(total	mass	=	37.89	grams)
orthopyroxene	mass	=	1.84	(gm)	density	=	3.44	(gm/cc)	(analysis	in	mole	%)
	opx	Na0.00Ca0.03Fe''0.75Mg1.15Fe'''0.02Ti0.00Al0.11Si1.93O6
	G	=	-25809.5	(J)	H	=	-21388.3	(J)	S	=	3.83	(J/K)	V	=	0.53	(cc)	Cp	=	2.15	(J/K)
	diopside	clinoenstatit	hedenbergite	alumino-buffo	buffonite	essenite	jadeite
	-78.22	96.67	74.65	4.52	-4.3	6.52	0.16
feldspar	mass	=	31.09	(gm)	density	=	2.64	(gm/cc)	(analysis	in	mole	%)
	K0.02Na0.47Ca0.52Al1.52Si2.48O8
	G	=	-516806	(J)	H	=	-438155	(J)	S	=	68.21	(J/K)	V	=	11.78	(cc)	Cp	=	37.42	(J/K)
	albite	anorthite	sanidine
	46.79	51.58	1.62
spinel	mass	=	4.81	(gm)	density	=	4.78	(gm/cc)	(analysis	in	mole	%)
	Fe''1.14Mg0.15Fe'''1.19Al0.23Cr0.00Ti0.29O4
	G	=	-36945.6	(J)	H	=	-26292	(J)	S	=	9.24	(J/K)	V	=	1.01	(cc)	Cp	=	4.38	(J/K)
	chromite	hercynite	magnetite	spinel	ulvospinel
	0	-3.55	59.7	14.85	29
apatite	mass	=	0.15	(gm)	density	=	3.06	(gm/cc)
	Ca5(PO4)3OH
	G	=	-2215.21	(J)	H	=	-1852.03	(J)	S	=	0.31	(J/K)	V	=	0.05	(cc)	Cp	=	0.17	(J/K)
Viscosity	of	the	System	cannot	be	computed.
System	mass	=	100.15	(gm)	density	=	1.95	(gm/cc)
	G	=	-1.61246e+06	(J)	H	=	-1.30982e+06	(J)	S	=	262.45	(J/K)	V	=	51.46	(cc)	Cp	=	134.75	(J/K)
Oxygen	delta	moles	=	0.00450893	delta	grams	=	0.14428
	G	=	-1165.81	(J)	H	=	126.63	(J)	S	=	1.12	(J/K)	V	=	432.3	(cc)	Cp	=	0.16	(J/K)
**********----------**********
Title:	Dummy	Title
T	=	870	(C)	P	=	1	(kbars)	log(10)	f	O2	=	-13	delta	HM	=	-5.61	NNO	=	-0.55	QFM	=	0	COH	=	1.75	IW	=	4.01
Constraint	Flags:	fO2	path	=	QFM	Fractionate	Solids
Liquid	mass	=	53.78	(gm)	density	=	2.25	(gm/cc)	viscosity	=	5.01	(log	10	poise)	(analysis	in	wt	%)
	G	=	-876823	(J)	H	=	-714609	(J)	S	=	141.9	(J/K)	V	=	23.93	(cc)	Cp	=	74.66	(J/K)
	SiO2	TiO2	Al2O3	Fe2O3	Cr2O3	FeO	MnO	MgO	NiO	CoO	CaO	Na2O	K2O	P2O5	H2O	CO2	SO3	Cl2O-1	F2O-1
	63.94	0.17	16.17	0.6	0	2.03	0.8	0.49	0	0	2.23	4.77	3.84	0.98	3.98	0	0	0	0
orthopyroxene	mass	=	0.24	(gm)	density	=	3.49	(gm/cc)	(analysis	in	mole	%)
	opx	Na0.00Ca0.02Fe''0.85Mg1.06Fe'''0.02Ti0.00Al0.11Si1.93O6
	G	=	-3270.09	(J)	H	=	-2706.61	(J)	S	=	0.49	(J/K)	V	=	0.07	(cc)	Cp	=	0.28	(J/K)
	diopside	clinoenstatit	hedenbergite	alumino-buffo	buffonite	essenite	jadeite
	-90.2	98.05	85.26	4.56	-4.42	6.6	0.16
feldspar	mass	=	2.48	(gm)	density	=	2.59	(gm/cc)	(analysis	in	mole	%)
	K0.04Na0.70Ca0.26Al1.26Si2.74O8
	G	=	-41135.6	(J)	H	=	-34837.5	(J)	S	=	5.51	(J/K)	V	=	0.96	(cc)	Cp	=	3.01	(J/K)
	albite	anorthite	sanidine
	69.51	26.09	4.41
spinel	mass	=	0.18	(gm)	density	=	4.85	(gm/cc)	(analysis	in	mole	%)
	Fe''1.11Mg0.10Fe'''1.40Al0.19Cr0.00Ti0.21O4
	G	=	-1298.89	(J)	H	=	-912.47	(J)	S	=	0.34	(J/K)	V	=	0.04	(cc)	Cp	=	0.16	(J/K)
	chromite	hercynite	magnetite	spinel	ulvospinel
	0	-0.52	70.02	9.85	20.65
apatite	mass	=	0.02	(gm)	density	=	3.06	(gm/cc)
	Ca5(PO4)3OH
	G	=	-307.28	(J)	H	=	-257.5	(J)	S	=	0.04	(J/K)	V	=	0.01	(cc)	Cp	=	0.02	(J/K)
water	mass	=	2.52	(gm)	density	=	0.21	(gm/cc)
	H2O
	G	=	-58366.8	(J)	H	=	-30274.5	(J)	S	=	24.58	(J/K)	V	=	12.17	(cc)	Cp	=	8.4	(J/K)
Total	solids	mass	=	5.44	(gm)	density	=	0.41	(gm/cc)
	G	=	-104379	(J)	H	=	-68988.6	(J)	S	=	30.96	(J/K)	V	=	13.24	(cc)	Cp	=	11.88	(J/K)
Summary	of	all	fractionated	phases:	(total	mass	=	40.93	grams)
orthopyroxene	mass	=	2.11	(gm)	density	=	3.45	(gm/cc)	(analysis	in	mole	%)
	opx	Na0.00Ca0.03Fe''0.76Mg1.14Fe'''0.02Ti0.00Al0.11Si1.93O6
	G	=	-29497.7	(J)	H	=	-24497	(J)	S	=	4.37	(J/K)	V	=	0.61	(cc)	Cp	=	2.46	(J/K)
	diopside	clinoenstatit	hedenbergite	alumino-buffo	buffonite	essenite	jadeite
	-79.36	96.81	75.66	4.52	-4.31	6.53	0.16
feldspar	mass	=	33.63	(gm)	density	=	2.64	(gm/cc)	(analysis	in	mole	%)
	K0.02Na0.48Ca0.50Al1.50Si2.50O8
	G	=	-558316	(J)	H	=	-474269	(J)	S	=	73.52	(J/K)	V	=	12.76	(cc)	Cp	=	40.47	(J/K)
	albite	anorthite	sanidine
	48.31	49.91	1.78
spinel	mass	=	5.01	(gm)	density	=	4.78	(gm/cc)	(analysis	in	mole	%)
	Fe''1.14Mg0.15Fe'''1.20Al0.22Cr0.00Ti0.29O4
	G	=	-38326	(J)	H	=	-27372.4	(J)	S	=	9.58	(J/K)	V	=	1.05	(cc)	Cp	=	4.56	(J/K)
	chromite	hercynite	magnetite	spinel	ulvospinel
	0	-3.45	60.07	14.68	28.7
apatite	mass	=	0.17	(gm)	density	=	3.06	(gm/cc)
	Ca5(PO4)3OH
	G	=	-2590.6	(J)	H	=	-2170.93	(J)	S	=	0.37	(J/K)	V	=	0.06	(cc)	Cp	=	0.2	(J/K)
Viscosity	of	the	System	cannot	be	computed.
System	mass	=	100.15	(gm)	density	=	1.94	(gm/cc)
	G	=	-1.60993e+06	(J)	H	=	-1.31191e+06	(J)	S	=	260.71	(J/K)	V	=	51.64	(cc)	Cp	=	134.22	(J/K)
Oxygen	delta	moles	=	0.00465942	delta	grams	=	0.149096
	G	=	-1193.14	(J)	H	=	129.2	(J)	S	=	1.16	(J/K)	V	=	442.85	(cc)	Cp	=	0.17	(J/K)
**********----------**********
Title:	Dummy	Title
T	=	860	(C)	P	=	1	(kbars)	log(10)	f	O2	=	-13.18	delta	HM	=	-5.62	NNO	=	-0.54	QFM	=	0	COH	=	1.73	IW	=	4.03
Constraint	Flags:	fO2	path	=	QFM	Fractionate	Solids
Liquid	mass	=	50.76	(gm)	density	=	2.25	(gm/cc)	viscosity	=	5.16	(log	10	poise)	(analysis	in	wt	%)
	G	=	-826892	(J)	H	=	-676104	(J)	S	=	133.07	(J/K)	V	=	22.6	(cc)	Cp	=	70.27	(J/K)
	SiO2	TiO2	Al2O3	Fe2O3	Cr2O3	FeO	MnO	MgO	NiO	CoO	CaO	Na2O	K2O	P2O5	H2O	CO2	SO3	Cl2O-1	F2O-1
	64.47	0.16	15.97	0.55	0	1.83	0.82	0.44	0	0	2.11	4.64	4.02	1.03	3.95	0	0	0	0
olivine	mass	=	0.26	(gm)	density	=	3.86	(gm/cc)	(analysis	in	mole	%)
	(Ca0.00Mg0.36Fe''0.57Mn0.08Co0.00Ni0.00)2SiO4
	G	=	-2863.53	(J)	H	=	-2280.75	(J)	S	=	0.51	(J/K)	V	=	0.07	(cc)	Cp	=	0.27	(J/K)
	tephroite	fayalite	co-olivine	ni-olivine	monticellite	forsterite
	7.55	56.71	0	0	0.25	35.49
feldspar	mass	=	2.53	(gm)	density	=	2.58	(gm/cc)	(analysis	in	mole	%)
	K0.05Na0.72Ca0.22Al1.22Si2.78O8
	G	=	-41828.4	(J)	H	=	-35485.9	(J)	S	=	5.6	(J/K)	V	=	0.98	(cc)	Cp	=	3.07	(J/K)
	albite	anorthite	sanidine
	72.23	22.43	5.34
spinel	mass	=	0.11	(gm)	density	=	4.86	(gm/cc)	(analysis	in	mole	%)
	Fe''1.11Mg0.09Fe'''1.41Al0.18Cr0.00Ti0.21O4
	G	=	-757.72	(J)	H	=	-533.76	(J)	S	=	0.2	(J/K)	V	=	0.02	(cc)	Cp	=	0.09	(J/K)
	chromite	hercynite	magnetite	spinel	ulvospinel
	0	-0.34	70.36	9.24	20.74
apatite	mass	=	0.01	(gm)	density	=	3.06	(gm/cc)
	Ca5(PO4)3OH
	G	=	-214.47	(J)	H	=	-180.14	(J)	S	=	0.03	(J/K)	V	=	0	(cc)	Cp	=	0.02	(J/K)
water	mass	=	2.65	(gm)	density	=	0.21	(gm/cc)
	H2O
	G	=	-61157.5	(J)	H	=	-31944.7	(J)	S	=	25.78	(J/K)	V	=	12.62	(cc)	Cp	=	8.91	(J/K)
Total	solids	mass	=	5.56	(gm)	density	=	0.41	(gm/cc)
	G	=	-106822	(J)	H	=	-70425.3	(J)	S	=	32.12	(J/K)	V	=	13.69	(cc)	Cp	=	12.36	(J/K)
Summary	of	all	fractionated	phases:	(total	mass	=	43.84	grams)
orthopyroxene	mass	=	2.35	(gm)	density	=	3.45	(gm/cc)	(analysis	in	mole	%)
	opx	Na0.00Ca0.03Fe''0.77Mg1.14Fe'''0.02Ti0.00Al0.11Si1.93O6
	G	=	-32688.1	(J)	H	=	-27205	(J)	S	=	4.84	(J/K)	V	=	0.68	(cc)	Cp	=	2.73	(J/K)
	diopside	clinoenstatit	hedenbergite	alumino-buffo	buffonite	essenite	jadeite
	-80.44	96.93	76.62	4.53	-4.32	6.53	0.16
feldspar	mass	=	36.11	(gm)	density	=	2.63	(gm/cc)	(analysis	in	mole	%)
	K0.02Na0.50Ca0.48Al1.48Si2.52O8
	G	=	-598626	(J)	H	=	-509502	(J)	S	=	78.65	(J/K)	V	=	13.71	(cc)	Cp	=	43.43	(J/K)
	albite	anorthite	sanidine
	49.78	48.26	1.96
spinel	mass	=	5.19	(gm)	density	=	4.79	(gm/cc)	(analysis	in	mole	%)
	Fe''1.14Mg0.15Fe'''1.21Al0.22Cr0.00Ti0.28O4
	G	=	-39510.1	(J)	H	=	-28320.7	(J)	S	=	9.87	(J/K)	V	=	1.08	(cc)	Cp	=	4.72	(J/K)
	chromite	hercynite	magnetite	spinel	ulvospinel
	0	-3.35	60.41	14.52	28.43
apatite	mass	=	0.19	(gm)	density	=	3.06	(gm/cc)
	Ca5(PO4)3OH
	G	=	-2819.32	(J)	H	=	-2368.09	(J)	S	=	0.4	(J/K)	V	=	0.06	(cc)	Cp	=	0.21	(J/K)
Viscosity	of	the	System	cannot	be	computed.
System	mass	=	100.15	(gm)	density	=	1.93	(gm/cc)
	G	=	-1.60736e+06	(J)	H	=	-1.31392e+06	(J)	S	=	258.95	(J/K)	V	=	51.82	(cc)	Cp	=	133.72	(J/K)
Oxygen	delta	moles	=	0.00469023	delta	grams	=	0.150082
	G	=	-1189.4	(J)	H	=	128.4	(J)	S	=	1.16	(J/K)	V	=	441.88	(cc)	Cp	=	0.17	(J/K)
**********----------**********
Title:	Dummy	Title
T	=	850	(C)	P	=	1	(kbars)	log(10)	f	O2	=	-13.37	delta	HM	=	-5.62	NNO	=	-0.54	QFM	=	0	COH	=	1.72	IW	=	4.05
Constraint	Flags:	fO2	path	=	QFM	Fractionate	Solids
Liquid	mass	=	47.78	(gm)	density	=	2.24	(gm/cc)	viscosity	=	5.31	(log	10	poise)	(analysis	in	wt	%)
	G	=	-777740	(J)	H	=	-638000	(J)	S	=	124.42	(J/K)	V	=	21.28	(cc)	Cp	=	65.97	(J/K)
	SiO2	TiO2	Al2O3	Fe2O3	Cr2O3	FeO	MnO	MgO	NiO	CoO	CaO	Na2O	K2O	P2O5	H2O	CO2	SO3	Cl2O-1	F2O-1
	64.97	0.16	15.75	0.51	0	1.64	0.83	0.39	0	0	2.04	4.47	4.21	1.09	3.93	0	0	0	0
olivine	mass	=	0.25	(gm)	density	=	3.89	(gm/cc)	(analysis	in	mole	%)
	(Ca0.00Mg0.33Fe''0.58Mn0.08Co0.00Ni0.00)2SiO4
	G	=	-2680.39	(J)	H	=	-2135.28	(J)	S	=	0.49	(J/K)	V	=	0.06	(cc)	Cp	=	0.25	(J/K)
	tephroite	fayalite	co-olivine	ni-olivine	monticellite	forsterite
	8.31	58.27	0	0	0.22	33.2
feldspar	mass	=	2.52	(gm)	density	=	2.58	(gm/cc)	(analysis	in	mole	%)
	K0.07Na0.75Ca0.19Al1.19Si2.81O8
	G	=	-41603.5	(J)	H	=	-35356.9	(J)	S	=	5.56	(J/K)	V	=	0.98	(cc)	Cp	=	3.06	(J/K)
	albite	anorthite	sanidine
	74.58	18.87	6.55
spinel	mass	=	0.08	(gm)	density	=	4.87	(gm/cc)	(analysis	in	mole	%)
	Fe''1.12Mg0.09Fe'''1.41Al0.17Cr0.00Ti0.21O4
	G	=	-588.59	(J)	H	=	-415.83	(J)	S	=	0.15	(J/K)	V	=	0.02	(cc)	Cp	=	0.07	(J/K)
	chromite	hercynite	magnetite	spinel	ulvospinel
	0	-0.2	70.54	8.65	21.01
apatite	mass	=	0.01	(gm)	density	=	3.06	(gm/cc)
	Ca5(PO4)3OH
	G	=	-86.65	(J)	H	=	-72.95	(J)	S	=	0.01	(J/K)	V	=	0	(cc)	Cp	=	0.01	(J/K)
water	mass	=	2.78	(gm)	density	=	0.21	(gm/cc)
	H2O
	G	=	-63926.4	(J)	H	=	-33626.1	(J)	S	=	26.98	(J/K)	V	=	13.05	(cc)	Cp	=	9.43	(J/K)
Total	solids	mass	=	5.64	(gm)	density	=	0.4	(gm/cc)
	G	=	-108886	(J)	H	=	-71607.1	(J)	S	=	33.19	(J/K)	V	=	14.11	(cc)	Cp	=	12.82	(J/K)
Summary	of	all	fractionated	phases:	(total	mass	=	46.74	grams)
olivine	mass	=	0.26	(gm)	density	=	3.87	(gm/cc)	(analysis	in	mole	%)
	(Ca0.00Mg0.36Fe''0.57Mn0.08Co0.00Ni0.00)2SiO4
	G	=	-2838.36	(J)	H	=	-2267.4	(J)	S	=	0.51	(J/K)	V	=	0.07	(cc)	Cp	=	0.26	(J/K)
	tephroite	fayalite	co-olivine	ni-olivine	monticellite	forsterite
	7.55	56.71	0	0	0.25	35.49
orthopyroxene	mass	=	2.35	(gm)	density	=	3.45	(gm/cc)	(analysis	in	mole	%)
	opx	Na0.00Ca0.03Fe''0.77Mg1.14Fe'''0.02Ti0.00Al0.11Si1.93O6
	G	=	-32639.9	(J)	H	=	-27232.4	(J)	S	=	4.81	(J/K)	V	=	0.68	(cc)	Cp	=	2.73	(J/K)
	diopside	clinoenstatit	hedenbergite	alumino-buffo	buffonite	essenite	jadeite
	-80.44	96.93	76.62	4.53	-4.32	6.53	0.16
feldspar	mass	=	38.64	(gm)	density	=	2.63	(gm/cc)	(analysis	in	mole	%)
	K0.02Na0.51Ca0.47Al1.47Si2.53O8
	G	=	-639580	(J)	H	=	-545413	(J)	S	=	83.84	(J/K)	V	=	14.68	(cc)	Cp	=	46.45	(J/K)
	albite	anorthite	sanidine
	51.27	46.55	2.19
spinel	mass	=	5.29	(gm)	density	=	4.79	(gm/cc)	(analysis	in	mole	%)
	Fe''1.14Mg0.14Fe'''1.21Al0.22Cr0.00Ti0.28O4
	G	=	-40151.6	(J)	H	=	-28891.2	(J)	S	=	10.03	(J/K)	V	=	1.1	(cc)	Cp	=	4.81	(J/K)
	chromite	hercynite	magnetite	spinel	ulvospinel
	0	-3.29	60.6	14.42	28.28
apatite	mass	=	0.2	(gm)	density	=	3.06	(gm/cc)
	Ca5(PO4)3OH
	G	=	-2955.15	(J)	H	=	-2487.93	(J)	S	=	0.42	(J/K)	V	=	0.07	(cc)	Cp	=	0.22	(J/K)
Viscosity	of	the	System	cannot	be	computed.
System	mass	=	100.15	(gm)	density	=	1.93	(gm/cc)
	G	=	-1.60479e+06	(J)	H	=	-1.3159e+06	(J)	S	=	257.22	(J/K)	V	=	51.99	(cc)	Cp	=	133.26	(J/K)
Oxygen	delta	moles	=	0.0046971	delta	grams	=	0.150301
	G	=	-1179.5	(J)	H	=	126.92	(J)	S	=	1.16	(J/K)	V	=	438.62	(cc)	Cp	=	0.17	(J/K)
**********----------**********
Title:	Dummy	Title
T	=	840	(C)	P	=	1	(kbars)	log(10)	f	O2	=	-13.57	delta	HM	=	-5.63	NNO	=	-0.53	QFM	=	0	COH	=	1.7	IW	=	4.07
Constraint	Flags:	fO2	path	=	QFM	Fractionate	Solids
Liquid	mass	=	44.83	(gm)	density	=	2.24	(gm/cc)	viscosity	=	5.46	(log	10	poise)	(analysis	in	wt	%)
	G	=	-728991	(J)	H	=	-599996	(J)	S	=	115.88	(J/K)	V	=	19.97	(cc)	Cp	=	61.72	(J/K)
	SiO2	TiO2	Al2O3	Fe2O3	Cr2O3	FeO	MnO	MgO	NiO	CoO	CaO	Na2O	K2O	P2O5	H2O	CO2	SO3	Cl2O-1	F2O-1
	65.45	0.16	15.54	0.46	0	1.47	0.85	0.34	0	0	1.99	4.26	4.41	1.17	3.89	0	0	0	0
olivine	mass	=	0.23	(gm)	density	=	3.92	(gm/cc)	(analysis	in	mole	%)
	(Ca0.00Mg0.31Fe''0.60Mn0.09Co0.00Ni0.00)2SiO4
	G	=	-2497.36	(J)	H	=	-1989.88	(J)	S	=	0.46	(J/K)	V	=	0.06	(cc)	Cp	=	0.24	(J/K)
	tephroite	fayalite	co-olivine	ni-olivine	monticellite	forsterite
	9.15	59.78	0	0	0.18	30.89
feldspar	mass	=	2.53	(gm)	density	=	2.57	(gm/cc)	(analysis	in	mole	%)
	K0.08Na0.76Ca0.15Al1.15Si2.85O8
	G	=	-41685	(J)	H	=	-35488.3	(J)	S	=	5.57	(J/K)	V	=	0.99	(cc)	Cp	=	3.07	(J/K)
	albite	anorthite	sanidine
	76.38	15.43	8.19
spinel	mass	=	0.06	(gm)	density	=	4.88	(gm/cc)	(analysis	in	mole	%)
	Fe''1.13Mg0.08Fe'''1.41Al0.16Cr0.00Ti0.21O4
	G	=	-443.82	(J)	H	=	-314.52	(J)	S	=	0.12	(J/K)	V	=	0.01	(cc)	Cp	=	0.06	(J/K)
	chromite	hercynite	magnetite	spinel	ulvospinel
	0	-0.09	70.52	8.08	21.49
water	mass	=	2.91	(gm)	density	=	0.22	(gm/cc)
	H2O
	G	=	-66687.4	(J)	H	=	-35326.1	(J)	S	=	28.18	(J/K)	V	=	13.46	(cc)	Cp	=	9.97	(J/K)
Total	solids	mass	=	5.74	(gm)	density	=	0.4	(gm/cc)
	G	=	-111314	(J)	H	=	-73118.9	(J)	S	=	34.31	(J/K)	V	=	14.52	(cc)	Cp	=	13.33	(J/K)
Summary	of	all	fractionated	phases:	(total	mass	=	49.58	grams)
olivine	mass	=	0.5	(gm)	density	=	3.88	(gm/cc)	(analysis	in	mole	%)
	(Ca0.00Mg0.35Fe''0.57Mn0.08Co0.00Ni0.00)2SiO4
	G	=	-5488.97	(J)	H	=	-4391.95	(J)	S	=	0.99	(J/K)	V	=	0.13	(cc)	Cp	=	0.51	(J/K)
	tephroite	fayalite	co-olivine	ni-olivine	monticellite	forsterite
	7.92	57.47	0	0	0.23	34.38
orthopyroxene	mass	=	2.35	(gm)	density	=	3.46	(gm/cc)	(analysis	in	mole	%)
	opx	Na0.00Ca0.03Fe''0.77Mg1.14Fe'''0.02Ti0.00Al0.11Si1.93O6
	G	=	-32591.8	(J)	H	=	-27259.7	(J)	S	=	4.79	(J/K)	V	=	0.68	(cc)	Cp	=	2.73	(J/K)
	diopside	clinoenstatit	hedenbergite	alumino-buffo	buffonite	essenite	jadeite
	-80.44	96.93	76.62	4.53	-4.32	6.53	0.16
feldspar	mass	=	41.16	(gm)	density	=	2.63	(gm/cc)	(analysis	in	mole	%)
	K0.02Na0.53Ca0.45Al1.45Si2.55O8
	G	=	-680259	(J)	H	=	-581224	(J)	S	=	88.97	(J/K)	V	=	15.66	(cc)	Cp	=	49.46	(J/K)
	albite	anorthite	sanidine
	52.71	44.83	2.46
spinel	mass	=	5.37	(gm)	density	=	4.79	(gm/cc)	(analysis	in	mole	%)
	Fe''1.14Mg0.14Fe'''1.21Al0.22Cr0.00Ti0.28O4
	G	=	-40622.8	(J)	H	=	-29344.5	(J)	S	=	10.13	(J/K)	V	=	1.12	(cc)	Cp	=	4.87	(J/K)
	chromite	hercynite	magnetite	spinel	ulvospinel
	0	-3.25	60.74	14.33	28.17
apatite	mass	=	0.2	(gm)	density	=	3.06	(gm/cc)
	Ca5(PO4)3OH
	G	=	-2963.28	(J)	H	=	-2500.53	(J)	S	=	0.42	(J/K)	V	=	0.07	(cc)	Cp	=	0.23	(J/K)
Viscosity	of	the	System	cannot	be	computed.
System	mass	=	100.15	(gm)	density	=	1.92	(gm/cc)
	G	=	-1.60223e+06	(J)	H	=	-1.31784e+06	(J)	S	=	255.49	(J/K)	V	=	52.14	(cc)	Cp	=	132.86	(J/K)
Oxygen	delta	moles	=	0.00468364	delta	grams	=	0.149871
	G	=	-1164.53	(J)	H	=	124.91	(J)	S	=	1.16	(J/K)	V	=	433.47	(cc)	Cp	=	0.17	(J/K)
**********----------**********
Title:	Dummy	Title
T	=	830	(C)	P	=	1	(kbars)	log(10)	f	O2	=	-13.77	delta	HM	=	-5.63	NNO	=	-0.53	QFM	=	0	COH	=	1.68	IW	=	4.09
Constraint	Flags:	fO2	path	=	QFM	Fractionate	Solids
Liquid	mass	=	41.88	(gm)	density	=	2.25	(gm/cc)	viscosity	=	5.62	(log	10	poise)	(analysis	in	wt	%)
	G	=	-680216	(J)	H	=	-561737	(J)	S	=	107.4	(J/K)	V	=	18.65	(cc)	Cp	=	57.49	(J/K)
	SiO2	TiO2	Al2O3	Fe2O3	Cr2O3	FeO	MnO	MgO	NiO	CoO	CaO	Na2O	K2O	P2O5	H2O	CO2	SO3	Cl2O-1	F2O-1
	65.93	0.16	15.32	0.42	0	1.31	0.87	0.3	0	0	1.98	4.01	4.61	1.25	3.84	0	0	0	0
olivine	mass	=	0.22	(gm)	density	=	3.94	(gm/cc)	(analysis	in	mole	%)
	(Ca0.00Mg0.29Fe''0.61Mn0.10Co0.00Ni0.00)2SiO4
	G	=	-2342.23	(J)	H	=	-1866.72	(J)	S	=	0.43	(J/K)	V	=	0.06	(cc)	Cp	=	0.22	(J/K)
	tephroite	fayalite	co-olivine	ni-olivine	monticellite	forsterite
	10.06	61.24	0	0	0.15	28.55
feldspar	mass	=	2.56	(gm)	density	=	2.56	(gm/cc)	(analysis	in	mole	%)
	K0.10Na0.77Ca0.12Al1.12Si2.88O8
	G	=	-41985.7	(J)	H	=	-35807.2	(J)	S	=	5.6	(J/K)	V	=	1	(cc)	Cp	=	3.1	(J/K)
	albite	anorthite	sanidine
	77.37	12.16	10.46
spinel	mass	=	0.04	(gm)	density	=	4.89	(gm/cc)	(analysis	in	mole	%)
	Fe''1.15Mg0.08Fe'''1.41Al0.15Cr0.00Ti0.22O4
	G	=	-311.97	(J)	H	=	-221.82	(J)	S	=	0.08	(J/K)	V	=	0.01	(cc)	Cp	=	0.04	(J/K)
	chromite	hercynite	magnetite	spinel	ulvospinel
	0	-0.02	70.26	7.52	22.23
water	mass	=	3.05	(gm)	density	=	0.22	(gm/cc)
	H2O
	G	=	-69449.5	(J)	H	=	-37049.8	(J)	S	=	29.37	(J/K)	V	=	13.86	(cc)	Cp	=	10.52	(J/K)
Total	solids	mass	=	5.87	(gm)	density	=	0.39	(gm/cc)
	G	=	-114089	(J)	H	=	-74945.5	(J)	S	=	35.49	(J/K)	V	=	14.92	(cc)	Cp	=	13.88	(J/K)
Summary	of	all	fractionated	phases:	(total	mass	=	52.4	grams)
olivine	mass	=	0.73	(gm)	density	=	3.89	(gm/cc)	(analysis	in	mole	%)
	(Ca0.00Mg0.34Fe''0.58Mn0.08Co0.00Ni0.00)2SiO4
	G	=	-7952.27	(J)	H	=	-6373.53	(J)	S	=	1.43	(J/K)	V	=	0.19	(cc)	Cp	=	0.75	(J/K)
	tephroite	fayalite	co-olivine	ni-olivine	monticellite	forsterite
	8.3	58.19	0	0	0.22	33.29
orthopyroxene	mass	=	2.35	(gm)	density	=	3.46	(gm/cc)	(analysis	in	mole	%)
	opx	Na0.00Ca0.03Fe''0.77Mg1.14Fe'''0.02Ti0.00Al0.11Si1.93O6
	G	=	-32544.1	(J)	H	=	-27286.9	(J)	S	=	4.77	(J/K)	V	=	0.68	(cc)	Cp	=	2.72	(J/K)
	diopside	clinoenstatit	hedenbergite	alumino-buffo	buffonite	essenite	jadeite
	-80.44	96.93	76.62	4.53	-4.32	6.53	0.16
feldspar	mass	=	43.69	(gm)	density	=	2.63	(gm/cc)	(analysis	in	mole	%)
	K0.03Na0.54Ca0.43Al1.43Si2.57O8
	G	=	-720970	(J)	H	=	-617197	(J)	S	=	94.07	(J/K)	V	=	16.63	(cc)	Cp	=	52.49	(J/K)
	albite	anorthite	sanidine
	54.1	43.1	2.79
spinel	mass	=	5.43	(gm)	density	=	4.8	(gm/cc)	(analysis	in	mole	%)
	Fe''1.14Mg0.14Fe'''1.22Al0.22Cr0.00Ti0.28O4
	G	=	-40948.7	(J)	H	=	-29697.1	(J)	S	=	10.2	(J/K)	V	=	1.13	(cc)	Cp	=	4.92	(J/K)
	chromite	hercynite	magnetite	spinel	ulvospinel
	0	-3.21	60.85	14.27	28.1
apatite	mass	=	0.2	(gm)	density	=	3.06	(gm/cc)
	Ca5(PO4)3OH
	G	=	-2959.13	(J)	H	=	-2502.79	(J)	S	=	0.41	(J/K)	V	=	0.07	(cc)	Cp	=	0.23	(J/K)
Viscosity	of	the	System	cannot	be	computed.
System	mass	=	100.15	(gm)	density	=	1.92	(gm/cc)
	G	=	-1.59968e+06	(J)	H	=	-1.31974e+06	(J)	S	=	253.77	(J/K)	V	=	52.27	(cc)	Cp	=	132.49	(J/K)
Oxygen	delta	moles	=	0.00465123	delta	grams	=	0.148834
	G	=	-1144.98	(J)	H	=	122.4	(J)	S	=	1.15	(J/K)	V	=	426.61	(cc)	Cp	=	0.16	(J/K)
**********----------**********
Title:	Dummy	Title
T	=	820	(C)	P	=	1	(kbars)	log(10)	f	O2	=	-13.97	delta	HM	=	-5.63	NNO	=	-0.52	QFM	=	0	COH	=	1.66	IW	=	4.11
Constraint	Flags:	fO2	path	=	QFM	Fractionate	Solids
Liquid	mass	=	38.92	(gm)	density	=	2.25	(gm/cc)	viscosity	=	5.79	(log	10	poise)	(analysis	in	wt	%)
	G	=	-631398	(J)	H	=	-523203	(J)	S	=	98.98	(J/K)	V	=	17.32	(cc)	Cp	=	53.28	(J/K)
	SiO2	TiO2	Al2O3	Fe2O3	Cr2O3	FeO	MnO	MgO	NiO	CoO	CaO	Na2O	K2O	P2O5	H2O	CO2	SO3	Cl2O-1	F2O-1
	66.39	0.17	15.09	0.38	0	1.16	0.89	0.26	0	0	2	3.72	4.79	1.35	3.79	0	0	0	0
olivine	mass	=	0.21	(gm)	density	=	3.97	(gm/cc)	(analysis	in	mole	%)
	(Ca0.00Mg0.26Fe''0.63Mn0.11Co0.00Ni0.00)2SiO4
	G	=	-2183.15	(J)	H	=	-1740.48	(J)	S	=	0.4	(J/K)	V	=	0.05	(cc)	Cp	=	0.21	(J/K)
	tephroite	fayalite	co-olivine	ni-olivine	monticellite	forsterite
	11.03	62.62	0	0	0.13	26.22
feldspar	mass	=	2.59	(gm)	density	=	2.55	(gm/cc)	(analysis	in	mole	%)
	K0.14Na0.77Ca0.09Al1.09Si2.91O8
	G	=	-42388.1	(J)	H	=	-36213.9	(J)	S	=	5.65	(J/K)	V	=	1.01	(cc)	Cp	=	3.14	(J/K)
	albite	anorthite	sanidine
	77.07	9.15	13.78
spinel	mass	=	0.03	(gm)	density	=	4.89	(gm/cc)	(analysis	in	mole	%)
	Fe''1.16Mg0.07Fe'''1.39Al0.14Cr0.00Ti0.23O4
	G	=	-195.47	(J)	H	=	-139.48	(J)	S	=	0.05	(J/K)	V	=	0.01	(cc)	Cp	=	0.02	(J/K)
	chromite	hercynite	magnetite	spinel	ulvospinel
	0	0.01	69.7	6.99	23.29
water	mass	=	3.18	(gm)	density	=	0.22	(gm/cc)
	H2O
	G	=	-72191.4	(J)	H	=	-38786.1	(J)	S	=	30.56	(J/K)	V	=	14.23	(cc)	Cp	=	11.09	(J/K)
Total	solids	mass	=	6.01	(gm)	density	=	0.39	(gm/cc)
	G	=	-116958	(J)	H	=	-76880	(J)	S	=	36.66	(J/K)	V	=	15.31	(cc)	Cp	=	14.46	(J/K)
Summary	of	all	fractionated	phases:	(total	mass	=	55.22	grams)
olivine	mass	=	0.95	(gm)	density	=	3.91	(gm/cc)	(analysis	in	mole	%)
	(Ca0.00Mg0.32Fe''0.59Mn0.09Co0.00Ni0.00)2SiO4
	G	=	-10256.4	(J)	H	=	-8234.26	(J)	S	=	1.85	(J/K)	V	=	0.24	(cc)	Cp	=	0.97	(J/K)
	tephroite	fayalite	co-olivine	ni-olivine	monticellite	forsterite
	8.7	58.89	0	0	0.2	32.2
orthopyroxene	mass	=	2.35	(gm)	density	=	3.46	(gm/cc)	(analysis	in	mole	%)
	opx	Na0.00Ca0.03Fe''0.77Mg1.14Fe'''0.02Ti0.00Al0.11Si1.93O6
	G	=	-32496.5	(J)	H	=	-27314.2	(J)	S	=	4.74	(J/K)	V	=	0.68	(cc)	Cp	=	2.72	(J/K)
	diopside	clinoenstatit	hedenbergite	alumino-buffo	buffonite	essenite	jadeite
	-80.44	96.93	76.62	4.53	-4.32	6.53	0.16
feldspar	mass	=	46.24	(gm)	density	=	2.62	(gm/cc)	(analysis	in	mole	%)
	K0.03Na0.55Ca0.41Al1.41Si2.59O8
	G	=	-761933	(J)	H	=	-653518	(J)	S	=	99.18	(J/K)	V	=	17.63	(cc)	Cp	=	55.55	(J/K)
	albite	anorthite	sanidine
	55.4	41.37	3.22
spinel	mass	=	5.47	(gm)	density	=	4.8	(gm/cc)	(analysis	in	mole	%)
	Fe''1.14Mg0.14Fe'''1.22Al0.22Cr0.00Ti0.28O4
	G	=	-41142.5	(J)	H	=	-29957.3	(J)	S	=	10.23	(J/K)	V	=	1.14	(cc)	Cp	=	4.96	(J/K)
	chromite	hercynite	magnetite	spinel	ulvospinel
	0	-3.19	60.92	14.21	28.05
apatite	mass	=	0.2	(gm)	density	=	3.06	(gm/cc)
	Ca5(PO4)3OH
	G	=	-2955	(J)	H	=	-2505.03	(J)	S	=	0.41	(J/K)	V	=	0.07	(cc)	Cp	=	0.22	(J/K)
Viscosity	of	the	System	cannot	be	computed.
System	mass	=	100.15	(gm)	density	=	1.91	(gm/cc)
	G	=	-1.59714e+06	(J)	H	=	-1.32161e+06	(J)	S	=	252.05	(J/K)	V	=	52.39	(cc)	Cp	=	132.16	(J/K)
Oxygen	delta	moles	=	0.00460314	delta	grams	=	0.147295
	G	=	-1121.77	(J)	H	=	119.51	(J)	S	=	1.14	(J/K)	V	=	418.37	(cc)	Cp	=	0.16	(J/K)
**********----------**********
Title:	Dummy	Title
T	=	810	(C)	P	=	1	(kbars)	log(10)	f	O2	=	-14.17	delta	HM	=	-5.64	NNO	=	-0.52	QFM	=	0	COH	=	1.64	IW	=	4.13
Constraint	Flags:	fO2	path	=	QFM	Fractionate	Solids
Liquid	mass	=	35.97	(gm)	density	=	2.25	(gm/cc)	viscosity	=	5.96	(log	10	poise)	(analysis	in	wt	%)
	G	=	-582775	(J)	H	=	-484575	(J)	S	=	90.66	(J/K)	V	=	16	(cc)	Cp	=	49.1	(J/K)
	SiO2	TiO2	Al2O3	Fe2O3	Cr2O3	FeO	MnO	MgO	NiO	CoO	CaO	Na2O	K2O	P2O5	H2O	CO2	SO3	Cl2O-1	F2O-1
	66.86	0.18	14.84	0.34	0	1.03	0.92	0.23	0	0	2.06	3.4	4.94	1.46	3.74	0	0	0	0
olivine	mass	=	0.2	(gm)	density	=	3.99	(gm/cc)	(analysis	in	mole	%)
	(Ca0.00Mg0.24Fe''0.64Mn0.12Co0.00Ni0.00)2SiO4
	G	=	-1996.47	(J)	H	=	-1592.39	(J)	S	=	0.37	(J/K)	V	=	0.05	(cc)	Cp	=	0.19	(J/K)
	tephroite	fayalite	co-olivine	ni-olivine	monticellite	forsterite
	12.06	63.88	0	0	0.11	23.95
feldspar	mass	=	2.62	(gm)	density	=	2.55	(gm/cc)	(analysis	in	mole	%)
	K0.19Na0.75Ca0.06Al1.06Si2.94O8
	G	=	-42622.6	(J)	H	=	-36477.7	(J)	S	=	5.67	(J/K)	V	=	1.03	(cc)	Cp	=	3.17	(J/K)
	albite	anorthite	sanidine
	74.56	6.42	19.02
spinel	mass	=	0.01	(gm)	density	=	4.9	(gm/cc)	(analysis	in	mole	%)
	Fe''1.18Mg0.06Fe'''1.38Al0.13Cr0.00Ti0.25O4
	G	=	-97.24	(J)	H	=	-69.67	(J)	S	=	0.03	(J/K)	V	=	0	(cc)	Cp	=	0.01	(J/K)
	chromite	hercynite	magnetite	spinel	ulvospinel
	0	0	68.76	6.49	24.75
water	mass	=	3.31	(gm)	density	=	0.23	(gm/cc)
	H2O
	G	=	-74855.6	(J)	H	=	-40504.3	(J)	S	=	31.72	(J/K)	V	=	14.58	(cc)	Cp	=	11.66	(J/K)
Total	solids	mass	=	6.14	(gm)	density	=	0.39	(gm/cc)
	G	=	-119572	(J)	H	=	-78644	(J)	S	=	37.79	(J/K)	V	=	15.66	(cc)	Cp	=	15.04	(J/K)
Summary	of	all	fractionated	phases:	(total	mass	=	58.04	grams)
olivine	mass	=	1.16	(gm)	density	=	3.92	(gm/cc)	(analysis	in	mole	%)
	(Ca0.00Mg0.31Fe''0.60Mn0.09Co0.00Ni0.00)2SiO4
	G	=	-12397.8	(J)	H	=	-9970.92	(J)	S	=	2.24	(J/K)	V	=	0.3	(cc)	Cp	=	1.17	(J/K)
	tephroite	fayalite	co-olivine	ni-olivine	monticellite	forsterite
	9.12	59.55	0	0	0.19	31.15
orthopyroxene	mass	=	2.35	(gm)	density	=	3.46	(gm/cc)	(analysis	in	mole	%)
	opx	Na0.00Ca0.03Fe''0.77Mg1.14Fe'''0.02Ti0.00Al0.11Si1.93O6
	G	=	-32449.3	(J)	H	=	-27341.3	(J)	S	=	4.72	(J/K)	V	=	0.68	(cc)	Cp	=	2.72	(J/K)
	diopside	clinoenstatit	hedenbergite	alumino-buffo	buffonite	essenite	jadeite
	-80.44	96.93	76.62	4.53	-4.32	6.53	0.16
feldspar	mass	=	48.83	(gm)	density	=	2.62	(gm/cc)	(analysis	in	mole	%)
	K0.04Na0.57Ca0.40Al1.40Si2.60O8
	G	=	-803248	(J)	H	=	-690274	(J)	S	=	104.3	(J/K)	V	=	18.63	(cc)	Cp	=	58.65	(J/K)
	albite	anorthite	sanidine
	56.57	39.64	3.79
spinel	mass	=	5.5	(gm)	density	=	4.8	(gm/cc)	(analysis	in	mole	%)
	Fe''1.14Mg0.14Fe'''1.22Al0.22Cr0.00Ti0.28O4
	G	=	-41219.7	(J)	H	=	-30135.4	(J)	S	=	10.23	(J/K)	V	=	1.15	(cc)	Cp	=	4.98	(J/K)
	chromite	hercynite	magnetite	spinel	ulvospinel
	0	-3.17	60.96	14.18	28.03
apatite	mass	=	0.2	(gm)	density	=	3.06	(gm/cc)
	Ca5(PO4)3OH
	G	=	-2950.9	(J)	H	=	-2507.28	(J)	S	=	0.41	(J/K)	V	=	0.07	(cc)	Cp	=	0.22	(J/K)
Viscosity	of	the	System	cannot	be	computed.
System	mass	=	100.15	(gm)	density	=	1.91	(gm/cc)
	G	=	-1.59461e+06	(J)	H	=	-1.32345e+06	(J)	S	=	250.35	(J/K)	V	=	52.47	(cc)	Cp	=	131.88	(J/K)
Oxygen	delta	moles	=	0.00454408	delta	grams	=	0.145405
	G	=	-1096.18	(J)	H	=	116.38	(J)	S	=	1.12	(J/K)	V	=	409.22	(cc)	Cp	=	0.16	(J/K)
**********----------**********
Title:	Dummy	Title
T	=	800	(C)	P	=	1	(kbars)	log(10)	f	O2	=	-14.38	delta	HM	=	-5.64	NNO	=	-0.51	QFM	=	0	COH	=	1.62	IW	=	4.15
Constraint	Flags:	fO2	path	=	QFM	Fractionate	Solids
Liquid	mass	=	33.08	(gm)	density	=	2.25	(gm/cc)	viscosity	=	6.13	(log	10	poise)	(analysis	in	wt	%)
	G	=	-535269	(J)	H	=	-446590	(J)	S	=	82.63	(J/K)	V	=	14.7	(cc)	Cp	=	45.03	(J/K)
	SiO2	TiO2	Al2O3	Fe2O3	Cr2O3	FeO	MnO	MgO	NiO	CoO	CaO	Na2O	K2O	P2O5	H2O	CO2	SO3	Cl2O-1	F2O-1
	67.32	0.19	14.58	0.31	0	0.92	0.95	0.2	0	0	2.18	3.07	4.99	1.59	3.69	0	0	0	0
olivine	mass	=	0.17	(gm)	density	=	4.02	(gm/cc)	(analysis	in	mole	%)
	(Ca0.00Mg0.22Fe''0.65Mn0.13Co0.00Ni0.00)2SiO4
	G	=	-1730.43	(J)	H	=	-1381.25	(J)	S	=	0.33	(J/K)	V	=	0.04	(cc)	Cp	=	0.17	(J/K)
	tephroite	fayalite	co-olivine	ni-olivine	monticellite	forsterite
	13.09	64.93	0	0	0.1	21.89
feldspar	mass	=	2.6	(gm)	density	=	2.53	(gm/cc)	(analysis	in	mole	%)
	K0.28Na0.68Ca0.04Al1.04Si2.96O8
	G	=	-42117.4	(J)	H	=	-36108	(J)	S	=	5.6	(J/K)	V	=	1.03	(cc)	Cp	=	3.13	(J/K)
	albite	anorthite	sanidine
	68.19	3.98	27.83
spinel	mass	=	0	(gm)	density	=	4.9	(gm/cc)	(analysis	in	mole	%)
	Fe''1.21Mg0.06Fe'''1.35Al0.12Cr0.00Ti0.27O4
	G	=	-29.27	(J)	H	=	-21.06	(J)	S	=	0.01	(J/K)	V	=	0	(cc)	Cp	=	0	(J/K)
	chromite	hercynite	magnetite	spinel	ulvospinel
	0	-0.06	67.33	6.05	26.69
water	mass	=	3.43	(gm)	density	=	0.23	(gm/cc)
	H2O
	G	=	-77310.9	(J)	H	=	-42132.2	(J)	S	=	32.78	(J/K)	V	=	14.87	(cc)	Cp	=	12.23	(J/K)
Total	solids	mass	=	6.21	(gm)	density	=	0.39	(gm/cc)
	G	=	-121188	(J)	H	=	-79642.5	(J)	S	=	38.72	(J/K)	V	=	15.94	(cc)	Cp	=	15.54	(J/K)
Summary	of	all	fractionated	phases:	(total	mass	=	60.86	grams)
olivine	mass	=	1.35	(gm)	density	=	3.93	(gm/cc)	(analysis	in	mole	%)
	(Ca0.00Mg0.30Fe''0.60Mn0.10Co0.00Ni0.00)2SiO4
	G	=	-14349.1	(J)	H	=	-11561.5	(J)	S	=	2.6	(J/K)	V	=	0.34	(cc)	Cp	=	1.36	(J/K)
	tephroite	fayalite	co-olivine	ni-olivine	monticellite	forsterite
	9.53	60.15	0	0	0.18	30.14
orthopyroxene	mass	=	2.35	(gm)	density	=	3.46	(gm/cc)	(analysis	in	mole	%)
	opx	Na0.00Ca0.03Fe''0.77Mg1.14Fe'''0.02Ti0.00Al0.11Si1.93O6
	G	=	-32402.2	(J)	H	=	-27368.5	(J)	S	=	4.69	(J/K)	V	=	0.68	(cc)	Cp	=	2.72	(J/K)
	diopside	clinoenstatit	hedenbergite	alumino-buffo	buffonite	essenite	jadeite
	-80.44	96.93	76.62	4.53	-4.32	6.53	0.16
feldspar	mass	=	51.45	(gm)	density	=	2.62	(gm/cc)	(analysis	in	mole	%)
	K0.05Na0.57Ca0.38Al1.38Si2.62O8
	G	=	-844746	(J)	H	=	-727318	(J)	S	=	109.42	(J/K)	V	=	19.65	(cc)	Cp	=	61.79	(J/K)
	albite	anorthite	sanidine
	57.49	37.94	4.57
spinel	mass	=	5.51	(gm)	density	=	4.8	(gm/cc)	(analysis	in	mole	%)
	Fe''1.14Mg0.14Fe'''1.22Al0.22Cr0.00Ti0.28O4
	G	=	-41199	(J)	H	=	-30243.7	(J)	S	=	10.21	(J/K)	V	=	1.15	(cc)	Cp	=	4.98	(J/K)
	chromite	hercynite	magnetite	spinel	ulvospinel
	0	-3.17	60.98	14.17	28.03
apatite	mass	=	0.2	(gm)	density	=	3.06	(gm/cc)
	Ca5(PO4)3OH
	G	=	-2946.81	(J)	H	=	-2509.52	(J)	S	=	0.41	(J/K)	V	=	0.07	(cc)	Cp	=	0.22	(J/K)
Viscosity	of	the	System	cannot	be	computed.
System	mass	=	100.15	(gm)	density	=	1.91	(gm/cc)
	G	=	-1.5921e+06	(J)	H	=	-1.32523e+06	(J)	S	=	248.68	(J/K)	V	=	52.52	(cc)	Cp	=	131.65	(J/K)
Oxygen	delta	moles	=	0.00448263	delta	grams	=	0.143439
	G	=	-1070.32	(J)	H	=	113.23	(J)	S	=	1.1	(J/K)	V	=	399.96	(cc)	Cp	=	0.16	(J/K)
**********----------**********
Title:	Dummy	Title
T	=	790	(C)	P	=	1	(kbars)	log(10)	f	O2	=	-14.6	delta	HM	=	-5.65	NNO	=	-0.51	QFM	=	0	COH	=	1.6	IW	=	4.17
Constraint	Flags:	fO2	path	=	QFM	Fractionate	Solids
Liquid	mass	=	30.55	(gm)	density	=	2.25	(gm/cc)	viscosity	=	6.29	(log	10	poise)	(analysis	in	wt	%)
	G	=	-493954	(J)	H	=	-413475	(J)	S	=	75.7	(J/K)	V	=	13.56	(cc)	Cp	=	41.5	(J/K)
	SiO2	TiO2	Al2O3	Fe2O3	Cr2O3	FeO	MnO	MgO	NiO	CoO	CaO	Na2O	K2O	P2O5	H2O	CO2	SO3	Cl2O-1	F2O-1
	67.81	0.21	14.34	0.28	0	0.83	0.98	0.18	0	0	2.28	2.79	4.95	1.69	3.66	0	0	0	0
olivine	mass	=	0.14	(gm)	density	=	4.03	(gm/cc)	(analysis	in	mole	%)
	(Ca0.00Mg0.20Fe''0.66Mn0.14Co0.00Ni0.00)2SiO4
	G	=	-1395.51	(J)	H	=	-1115.27	(J)	S	=	0.26	(J/K)	V	=	0.03	(cc)	Cp	=	0.14	(J/K)
	tephroite	fayalite	co-olivine	ni-olivine	monticellite	forsterite
	14.07	65.67	0	0	0.09	20.17
feldspar	mass	=	2.27	(gm)	density	=	2.53	(gm/cc)	(analysis	in	mole	%)
	K0.35Na0.62Ca0.03Al1.03Si2.97O8
	G	=	-36551.6	(J)	H	=	-31398.4	(J)	S	=	4.85	(J/K)	V	=	0.9	(cc)	Cp	=	2.73	(J/K)
	albite	anorthite	sanidine
	62.39	2.7	34.91
apatite	mass	=	0.02	(gm)	density	=	3.06	(gm/cc)
	Ca5(PO4)3OH
	G	=	-299.1	(J)	H	=	-255.29	(J)	S	=	0.04	(J/K)	V	=	0.01	(cc)	Cp	=	0.02	(J/K)
water	mass	=	3.54	(gm)	density	=	0.24	(gm/cc)
	H2O
	G	=	-79279.5	(J)	H	=	-43515.3	(J)	S	=	33.64	(J/K)	V	=	15.05	(cc)	Cp	=	12.74	(J/K)
Total	solids	mass	=	5.97	(gm)	density	=	0.37	(gm/cc)
	G	=	-117526	(J)	H	=	-76284.3	(J)	S	=	38.79	(J/K)	V	=	15.98	(cc)	Cp	=	15.63	(J/K)
Summary	of	all	fractionated	phases:	(total	mass	=	63.63	grams)
olivine	mass	=	1.52	(gm)	density	=	3.94	(gm/cc)	(analysis	in	mole	%)
	(Ca0.00Mg0.29Fe''0.61Mn0.10Co0.00Ni0.00)2SiO4
	G	=	-16031.4	(J)	H	=	-12942.6	(J)	S	=	2.91	(J/K)	V	=	0.39	(cc)	Cp	=	1.53	(J/K)
	tephroite	fayalite	co-olivine	ni-olivine	monticellite	forsterite
	9.91	60.67	0	0	0.17	29.24
orthopyroxene	mass	=	2.35	(gm)	density	=	3.46	(gm/cc)	(analysis	in	mole	%)
	opx	Na0.00Ca0.03Fe''0.77Mg1.14Fe'''0.02Ti0.00Al0.11Si1.93O6
	G	=	-32355.4	(J)	H	=	-27395.7	(J)	S	=	4.67	(J/K)	V	=	0.68	(cc)	Cp	=	2.71	(J/K)
	diopside	clinoenstatit	hedenbergite	alumino-buffo	buffonite	essenite	jadeite
	-80.44	96.93	76.62	4.53	-4.32	6.53	0.16
feldspar	mass	=	54.04	(gm)	density	=	2.62	(gm/cc)	(analysis	in	mole	%)
	K0.06Na0.58Ca0.36Al1.36Si2.64O8
	G	=	-885687	(J)	H	=	-764012	(J)	S	=	114.45	(J/K)	V	=	20.66	(cc)	Cp	=	64.91	(J/K)
	albite	anorthite	sanidine
	58.01	36.3	5.7
spinel	mass	=	5.51	(gm)	density	=	4.81	(gm/cc)	(analysis	in	mole	%)
	Fe''1.14Mg0.14Fe'''1.22Al0.22Cr0.00Ti0.28O4
	G	=	-41110.8	(J)	H	=	-30303.3	(J)	S	=	10.17	(J/K)	V	=	1.15	(cc)	Cp	=	4.98	(J/K)
	chromite	hercynite	magnetite	spinel	ulvospinel
	0	-3.17	60.98	14.16	28.03
apatite	mass	=	0.2	(gm)	density	=	3.06	(gm/cc)
	Ca5(PO4)3OH
	G	=	-2942.75	(J)	H	=	-2511.76	(J)	S	=	0.41	(J/K)	V	=	0.07	(cc)	Cp	=	0.22	(J/K)
Viscosity	of	the	System	cannot	be	computed.
System	mass	=	100.15	(gm)	density	=	1.91	(gm/cc)
	G	=	-1.58961e+06	(J)	H	=	-1.32692e+06	(J)	S	=	247.08	(J/K)	V	=	52.49	(cc)	Cp	=	131.48	(J/K)
Oxygen	delta	moles	=	0.00442826	delta	grams	=	0.141699
	G	=	-1046.45	(J)	H	=	110.3	(J)	S	=	1.09	(J/K)	V	=	391.43	(cc)	Cp	=	0.16	(J/K)
**********----------**********
Title:	Dummy	Title
T	=	780	(C)	P	=	1	(kbars)	log(10)	f	O2	=	-14.81	delta	HM	=	-5.65	NNO	=	-0.5	QFM	=	0	COH	=	1.59	IW	=	4.2
Constraint	Flags:	fO2	path	=	QFM	Fractionate	Solids
Liquid	mass	=	28.52	(gm)	density	=	2.25	(gm/cc)	viscosity	=	6.46	(log	10	poise)	(analysis	in	wt	%)
	G	=	-460759	(J)	H	=	-386921	(J)	S	=	70.11	(J/K)	V	=	12.65	(cc)	Cp	=	38.65	(J/K)
	SiO2	TiO2	Al2O3	Fe2O3	Cr2O3	FeO	MnO	MgO	NiO	CoO	CaO	Na2O	K2O	P2O5	H2O	CO2	SO3	Cl2O-1	F2O-1
	68.27	0.22	14.13	0.26	0	0.74	1.01	0.16	0	0	2.36	2.55	4.89	1.78	3.64	0	0	0	0
olivine	mass	=	0.11	(gm)	density	=	4.05	(gm/cc)	(analysis	in	mole	%)
	(Ca0.00Mg0.19Fe''0.66Mn0.15Co0.00Ni0.00)2SiO4
	G	=	-1078.22	(J)	H	=	-863.18	(J)	S	=	0.2	(J/K)	V	=	0.03	(cc)	Cp	=	0.11	(J/K)
	tephroite	fayalite	co-olivine	ni-olivine	monticellite	forsterite
	15.03	66.06	0	0	0.08	18.83
feldspar	mass	=	1.82	(gm)	density	=	2.53	(gm/cc)	(analysis	in	mole	%)
	K0.37Na0.61Ca0.02Al1.02Si2.98O8
	G	=	-29260.7	(J)	H	=	-25189.5	(J)	S	=	3.87	(J/K)	V	=	0.72	(cc)	Cp	=	2.19	(J/K)
	albite	anorthite	sanidine
	60.84	2.36	36.8
apatite	mass	=	0.03	(gm)	density	=	3.06	(gm/cc)
	Ca5(PO4)3OH
	G	=	-407.09	(J)	H	=	-348.26	(J)	S	=	0.06	(J/K)	V	=	0.01	(cc)	Cp	=	0.03	(J/K)
water	mass	=	3.62	(gm)	density	=	0.24	(gm/cc)
	H2O
	G	=	-80752.8	(J)	H	=	-44643.7	(J)	S	=	34.29	(J/K)	V	=	15.12	(cc)	Cp	=	13.19	(J/K)
Total	solids	mass	=	5.58	(gm)	density	=	0.35	(gm/cc)
	G	=	-111499	(J)	H	=	-71044.6	(J)	S	=	38.41	(J/K)	V	=	15.87	(cc)	Cp	=	15.51	(J/K)
Summary	of	all	fractionated	phases:	(total	mass	=	66.05	grams)
olivine	mass	=	1.66	(gm)	density	=	3.95	(gm/cc)	(analysis	in	mole	%)
	(Ca0.00Mg0.29Fe''0.61Mn0.10Co0.00Ni0.00)2SiO4
	G	=	-17376.5	(J)	H	=	-14059.2	(J)	S	=	3.15	(J/K)	V	=	0.42	(cc)	Cp	=	1.66	(J/K)
	tephroite	fayalite	co-olivine	ni-olivine	monticellite	forsterite
	10.25	61.08	0	0	0.16	28.51
orthopyroxene	mass	=	2.35	(gm)	density	=	3.47	(gm/cc)	(analysis	in	mole	%)
	opx	Na0.00Ca0.03Fe''0.77Mg1.14Fe'''0.02Ti0.00Al0.11Si1.93O6
	G	=	-32308.9	(J)	H	=	-27422.8	(J)	S	=	4.64	(J/K)	V	=	0.68	(cc)	Cp	=	2.71	(J/K)
	diopside	clinoenstatit	hedenbergite	alumino-buffo	buffonite	essenite	jadeite
	-80.44	96.93	76.62	4.53	-4.32	6.53	0.16
feldspar	mass	=	56.31	(gm)	density	=	2.61	(gm/cc)	(analysis	in	mole	%)
	K0.07Na0.58Ca0.35Al1.35Si2.65O8
	G	=	-921013	(J)	H	=	-796015	(J)	S	=	118.69	(J/K)	V	=	21.55	(cc)	Cp	=	67.65	(J/K)
	albite	anorthite	sanidine
	58.18	34.94	6.87
spinel	mass	=	5.51	(gm)	density	=	4.81	(gm/cc)	(analysis	in	mole	%)
	Fe''1.14Mg0.14Fe'''1.22Al0.22Cr0.00Ti0.28O4
	G	=	-41009.3	(J)	H	=	-30353.1	(J)	S	=	10.12	(J/K)	V	=	1.15	(cc)	Cp	=	4.98	(J/K)
	chromite	hercynite	magnetite	spinel	ulvospinel
	0	-3.17	60.98	14.16	28.03
apatite	mass	=	0.22	(gm)	density	=	3.06	(gm/cc)
	Ca5(PO4)3OH
	G	=	-3163.75	(J)	H	=	-2706.51	(J)	S	=	0.43	(J/K)	V	=	0.07	(cc)	Cp	=	0.24	(J/K)
Viscosity	of	the	System	cannot	be	computed.
System	mass	=	100.14	(gm)	density	=	1.91	(gm/cc)
	G	=	-1.58713e+06	(J)	H	=	-1.32852e+06	(J)	S	=	245.56	(J/K)	V	=	52.39	(cc)	Cp	=	131.4	(J/K)
Oxygen	delta	moles	=	0.00438733	delta	grams	=	0.140389
	G	=	-1026.01	(J)	H	=	107.74	(J)	S	=	1.08	(J/K)	V	=	384.16	(cc)	Cp	=	0.15	(J/K)
**********----------**********
Title:	Dummy	Title
T	=	770	(C)	P	=	1	(kbars)	log(10)	f	O2	=	-15.04	delta	HM	=	-5.65	NNO	=	-0.5	QFM	=	0	COH	=	1.57	IW	=	4.22
Constraint	Flags:	fO2	path	=	QFM	Fractionate	Solids
Liquid	mass	=	26.85	(gm)	density	=	2.26	(gm/cc)	viscosity	=	6.62	(log	10	poise)	(analysis	in	wt	%)
	G	=	-433431	(J)	H	=	-365110	(J)	S	=	65.5	(J/K)	V	=	11.91	(cc)	Cp	=	36.31	(J/K)
	SiO2	TiO2	Al2O3	Fe2O3	Cr2O3	FeO	MnO	MgO	NiO	CoO	CaO	Na2O	K2O	P2O5	H2O	CO2	SO3	Cl2O-1	F2O-1
	68.72	0.21	13.92	0.23	0	0.66	1.04	0.15	0	0	2.45	2.32	4.82	1.86	3.62	0	0	0	0
olivine	mass	=	0.08	(gm)	density	=	4.06	(gm/cc)	(analysis	in	mole	%)
	(Ca0.00Mg0.18Fe''0.66Mn0.16Co0.00Ni0.00)2SiO4
	G	=	-779.04	(J)	H	=	-625.03	(J)	S	=	0.15	(J/K)	V	=	0.02	(cc)	Cp	=	0.08	(J/K)
	tephroite	fayalite	co-olivine	ni-olivine	monticellite	forsterite
	16.02	66.05	0	0	0.08	17.85
feldspar	mass	=	1.5	(gm)	density	=	2.53	(gm/cc)	(analysis	in	mole	%)
	K0.38Na0.60Ca0.02Al1.02Si2.98O8
	G	=	-24061.6	(J)	H	=	-20758.6	(J)	S	=	3.17	(J/K)	V	=	0.59	(cc)	Cp	=	1.8	(J/K)
	albite	anorthite	sanidine
	59.67	2.14	38.18
rhm-oxide	mass	=	0.01	(gm)	density	=	4.66	(gm/cc)	(analysis	in	mole	%)
	Mn0.07Fe''0.72Mg0.09Fe'''0.16Al0.08Ti0.88O3
	G	=	-134.21	(J)	H	=	-108.23	(J)	S	=	0.02	(J/K)	V	=	0	(cc)	Cp	=	0.01	(J/K)
	geikielite	hematite	ilmenite	pyrophanite	corundum
	8.55	8.02	72.09	7.28	4.07
apatite	mass	=	0.02	(gm)	density	=	3.06	(gm/cc)
	Ca5(PO4)3OH
	G	=	-319.84	(J)	H	=	-274.23	(J)	S	=	0.04	(J/K)	V	=	0.01	(cc)	Cp	=	0.02	(J/K)
water	mass	=	3.68	(gm)	density	=	0.24	(gm/cc)
	H2O
	G	=	-81865.3	(J)	H	=	-45586.5	(J)	S	=	34.78	(J/K)	V	=	15.11	(cc)	Cp	=	13.6	(J/K)
Total	solids	mass	=	5.3	(gm)	density	=	0.34	(gm/cc)
	G	=	-107160	(J)	H	=	-67352.6	(J)	S	=	38.16	(J/K)	V	=	15.73	(cc)	Cp	=	15.52	(J/K)
Summary	of	all	fractionated	phases:	(total	mass	=	67.99	grams)
olivine	mass	=	1.77	(gm)	density	=	3.96	(gm/cc)	(analysis	in	mole	%)
	(Ca0.00Mg0.28Fe''0.61Mn0.11Co0.00Ni0.00)2SiO4
	G	=	-18402.6	(J)	H	=	-14924.7	(J)	S	=	3.33	(J/K)	V	=	0.45	(cc)	Cp	=	1.76	(J/K)
	tephroite	fayalite	co-olivine	ni-olivine	monticellite	forsterite
	10.53	61.37	0	0	0.16	27.94
orthopyroxene	mass	=	2.35	(gm)	density	=	3.47	(gm/cc)	(analysis	in	mole	%)
	opx	Na0.00Ca0.03Fe''0.77Mg1.14Fe'''0.02Ti0.00Al0.11Si1.93O6
	G	=	-32262.7	(J)	H	=	-27449.8	(J)	S	=	4.61	(J/K)	V	=	0.68	(cc)	Cp	=	2.71	(J/K)
	diopside	clinoenstatit	hedenbergite	alumino-buffo	buffonite	essenite	jadeite
	-80.44	96.93	76.62	4.53	-4.32	6.53	0.16
feldspar	mass	=	58.13	(gm)	density	=	2.61	(gm/cc)	(analysis	in	mole	%)
	K0.08Na0.58Ca0.34Al1.34Si2.66O8
	G	=	-949012	(J)	H	=	-821838	(J)	S	=	121.91	(J/K)	V	=	22.26	(cc)	Cp	=	69.87	(J/K)
	albite	anorthite	sanidine
	58.27	33.92	7.81
spinel	mass	=	5.51	(gm)	density	=	4.81	(gm/cc)	(analysis	in	mole	%)
	Fe''1.14Mg0.14Fe'''1.22Al0.22Cr0.00Ti0.28O4
	G	=	-40908.4	(J)	H	=	-30402.9	(J)	S	=	10.07	(J/K)	V	=	1.15	(cc)	Cp	=	4.97	(J/K)
	chromite	hercynite	magnetite	spinel	ulvospinel
	0	-3.17	60.98	14.16	28.03
apatite	mass	=	0.24	(gm)	density	=	3.06	(gm/cc)
	Ca5(PO4)3OH
	G	=	-3492.41	(J)	H	=	-2994.43	(J)	S	=	0.48	(J/K)	V	=	0.08	(cc)	Cp	=	0.27	(J/K)
Viscosity	of	the	System	cannot	be	computed.
System	mass	=	100.14	(gm)	density	=	1.92	(gm/cc)
	G	=	-1.58467e+06	(J)	H	=	-1.33007e+06	(J)	S	=	244.07	(J/K)	V	=	52.24	(cc)	Cp	=	131.4	(J/K)
Oxygen	delta	moles	=	0.00435691	delta	grams	=	0.139416
	G	=	-1008.21	(J)	H	=	105.47	(J)	S	=	1.07	(J/K)	V	=	377.88	(cc)	Cp	=	0.15	(J/K)
**********----------**********
Title:	Dummy	Title
T	=	760	(C)	P	=	1	(kbars)	log(10)	f	O2	=	-15.26	delta	HM	=	-5.66	NNO	=	-0.49	QFM	=	0	COH	=	1.54	IW	=	4.24
Constraint	Flags:	fO2	path	=	QFM	Fractionate	Solids
Liquid	mass	=	24.12	(gm)	density	=	2.26	(gm/cc)	viscosity	=	6.76	(log	10	poise)	(analysis	in	wt	%)
	G	=	-389076	(J)	H	=	-328751	(J)	S	=	58.39	(J/K)	V	=	10.68	(cc)	Cp	=	32.59	(J/K)
	SiO2	TiO2	Al2O3	Fe2O3	Cr2O3	FeO	MnO	MgO	NiO	CoO	CaO	Na2O	K2O	P2O5	H2O	CO2	SO3	Cl2O-1	F2O-1
	68.83	0.21	13.95	0.2	0	0.58	1.1	0.14	0	0	2.57	2.07	4.77	1.97	3.61	0	0	0	0
olivine	mass	=	0.09	(gm)	density	=	4.06	(gm/cc)	(analysis	in	mole	%)
	(Ca0.00Mg0.17Fe''0.65Mn0.18Co0.00Ni0.00)2SiO4
	G	=	-869.61	(J)	H	=	-699.48	(J)	S	=	0.16	(J/K)	V	=	0.02	(cc)	Cp	=	0.09	(J/K)
	tephroite	fayalite	co-olivine	ni-olivine	monticellite	forsterite
	17.52	65.35	0	0	0.07	17.06
feldspar	mass	=	1.93	(gm)	density	=	2.52	(gm/cc)	(analysis	in	mole	%)
	K0.42Na0.56Ca0.02Al1.02Si2.98O8
	G	=	-30939.4	(J)	H	=	-26749.4	(J)	S	=	4.06	(J/K)	V	=	0.77	(cc)	Cp	=	2.32	(J/K)
	albite	anorthite	sanidine
	55.98	1.73	42.3
quartz	mass	=	0.53	(gm)	density	=	2.54	(gm/cc)
	SiO2
	G	=	-8730.56	(J)	H	=	-7644.54	(J)	S	=	1.05	(J/K)	V	=	0.21	(cc)	Cp	=	0.62	(J/K)
rhm-oxide	mass	=	0.02	(gm)	density	=	4.67	(gm/cc)	(analysis	in	mole	%)
	Mn0.08Fe''0.72Mg0.08Fe'''0.15Al0.08Ti0.88O3
	G	=	-165.79	(J)	H	=	-134.13	(J)	S	=	0.03	(J/K)	V	=	0	(cc)	Cp	=	0.02	(J/K)
	geikielite	hematite	ilmenite	pyrophanite	corundum
	8.37	7.64	72.25	7.64	4.1
apatite	mass	=	0.06	(gm)	density	=	3.06	(gm/cc)
	Ca5(PO4)3OH
	G	=	-897.68	(J)	H	=	-771.41	(J)	S	=	0.12	(J/K)	V	=	0.02	(cc)	Cp	=	0.07	(J/K)
water	mass	=	3.78	(gm)	density	=	0.25	(gm/cc)
	H2O
	G	=	-83749	(J)	H	=	-46974.8	(J)	S	=	35.6	(J/K)	V	=	15.23	(cc)	Cp	=	14.17	(J/K)
Total	solids	mass	=	6.42	(gm)	density	=	0.4	(gm/cc)
	G	=	-125352	(J)	H	=	-82973.7	(J)	S	=	41.02	(J/K)	V	=	16.25	(cc)	Cp	=	17.28	(J/K)
Summary	of	all	fractionated	phases:	(total	mass	=	69.6	grams)
olivine	mass	=	1.84	(gm)	density	=	3.96	(gm/cc)	(analysis	in	mole	%)
	(Ca0.00Mg0.28Fe''0.62Mn0.11Co0.00Ni0.00)2SiO4
	G	=	-19128.2	(J)	H	=	-15552.9	(J)	S	=	3.46	(J/K)	V	=	0.47	(cc)	Cp	=	1.83	(J/K)
	tephroite	fayalite	co-olivine	ni-olivine	monticellite	forsterite
	10.75	61.56	0	0	0.15	27.53
orthopyroxene	mass	=	2.35	(gm)	density	=	3.47	(gm/cc)	(analysis	in	mole	%)
	opx	Na0.00Ca0.03Fe''0.77Mg1.14Fe'''0.02Ti0.00Al0.11Si1.93O6
	G	=	-32216.7	(J)	H	=	-27476.9	(J)	S	=	4.59	(J/K)	V	=	0.68	(cc)	Cp	=	2.7	(J/K)
	diopside	clinoenstatit	hedenbergite	alumino-buffo	buffonite	essenite	jadeite
	-80.44	96.93	76.62	4.53	-4.32	6.53	0.16
feldspar	mass	=	59.62	(gm)	density	=	2.61	(gm/cc)	(analysis	in	mole	%)
	K0.09Na0.58Ca0.33Al1.33Si2.67O8
	G	=	-971785	(J)	H	=	-843253	(J)	S	=	124.41	(J/K)	V	=	22.84	(cc)	Cp	=	71.74	(J/K)
	albite	anorthite	sanidine
	58.3	33.12	8.57
spinel	mass	=	5.51	(gm)	density	=	4.81	(gm/cc)	(analysis	in	mole	%)
	Fe''1.14Mg0.14Fe'''1.22Al0.22Cr0.00Ti0.28O4
	G	=	-40807.9	(J)	H	=	-30452.6	(J)	S	=	10.02	(J/K)	V	=	1.15	(cc)	Cp	=	4.97	(J/K)
	chromite	hercynite	magnetite	spinel	ulvospinel
	0	-3.17	60.98	14.16	28.03
rhm-oxide	mass	=	0.01	(gm)	density	=	4.67	(gm/cc)	(analysis	in	mole	%)
	Mn0.07Fe''0.72Mg0.09Fe'''0.16Al0.08Ti0.88O3
	G	=	-119.68	(J)	H	=	-96.8	(J)	S	=	0.02	(J/K)	V	=	0	(cc)	Cp	=	0.01	(J/K)
	geikielite	hematite	ilmenite	pyrophanite	corundum
	8.55	8.02	72.09	7.28	4.07
apatite	mass	=	0.26	(gm)	density	=	3.06	(gm/cc)
	Ca5(PO4)3OH
	G	=	-3733.61	(J)	H	=	-3208.44	(J)	S	=	0.51	(J/K)	V	=	0.08	(cc)	Cp	=	0.28	(J/K)
Viscosity	of	the	System	cannot	be	computed.
System	mass	=	100.14	(gm)	density	=	1.92	(gm/cc)
	G	=	-1.58222e+06	(J)	H	=	-1.33176e+06	(J)	S	=	242.42	(J/K)	V	=	52.15	(cc)	Cp	=	131.41	(J/K)
Oxygen	delta	moles	=	0.00432157	delta	grams	=	0.138285
	G	=	-989.45	(J)	H	=	103.1	(J)	S	=	1.06	(J/K)	V	=	371.22	(cc)	Cp	=	0.15	(J/K)
**********----------**********
Title:	Dummy	Title
T	=	750	(C)	P	=	1	(kbars)	log(10)	f	O2	=	-15.49	delta	HM	=	-5.66	NNO	=	-0.49	QFM	=	0	COH	=	1.52	IW	=	4.27
Constraint	Flags:	fO2	path	=	QFM	Fractionate	Solids
Liquid	mass	=	18.04	(gm)	density	=	2.27	(gm/cc)	viscosity	=	6.81	(log	10	poise)	(analysis	in	wt	%)
	G	=	-290597	(J)	H	=	-246261	(J)	S	=	43.33	(J/K)	V	=	7.95	(cc)	Cp	=	24.47	(J/K)
	SiO2	TiO2	Al2O3	Fe2O3	Cr2O3	FeO	MnO	MgO	NiO	CoO	CaO	Na2O	K2O	P2O5	H2O	CO2	SO3	Cl2O-1	F2O-1
	67.51	0.21	15.03	0.17	0	0.48	1.36	0.13	0	0	2.82	1.67	4.78	2.21	3.62	0	0	0	0
olivine	mass	=	0.13	(gm)	density	=	4.06	(gm/cc)	(analysis	in	mole	%)
	(Ca0.00Mg0.17Fe''0.62Mn0.21Co0.00Ni0.00)2SiO4
	G	=	-1253.91	(J)	H	=	-1012.22	(J)	S	=	0.24	(J/K)	V	=	0.03	(cc)	Cp	=	0.12	(J/K)
	tephroite	fayalite	co-olivine	ni-olivine	monticellite	forsterite
	20.95	62.29	0	0	0.06	16.7
feldspar	mass	=	3.42	(gm)	density	=	2.52	(gm/cc)	(analysis	in	mole	%)
	K0.48Na0.50Ca0.01Al1.01Si2.99O8
	G	=	-54435.2	(J)	H	=	-47165.4	(J)	S	=	7.11	(J/K)	V	=	1.36	(cc)	Cp	=	4.1	(J/K)
	albite	anorthite	sanidine
	50.2	1.31	48.49
quartz	mass	=	2.12	(gm)	density	=	2.54	(gm/cc)
	SiO2
	G	=	-34652.9	(J)	H	=	-30403.3	(J)	S	=	4.15	(J/K)	V	=	0.83	(cc)	Cp	=	2.45	(J/K)
rhm-oxide	mass	=	0.03	(gm)	density	=	4.66	(gm/cc)	(analysis	in	mole	%)
	Mn0.09Fe''0.71Mg0.09Fe'''0.14Al0.09Ti0.88O3
	G	=	-265.6	(J)	H	=	-215.77	(J)	S	=	0.05	(J/K)	V	=	0.01	(cc)	Cp	=	0.02	(J/K)
	geikielite	hematite	ilmenite	pyrophanite	corundum
	8.55	7.07	71.05	8.7	4.63
apatite	mass	=	0.19	(gm)	density	=	3.06	(gm/cc)
	Ca5(PO4)3OH
	G	=	-2735	(J)	H	=	-2355.57	(J)	S	=	0.37	(J/K)	V	=	0.06	(cc)	Cp	=	0.21	(J/K)
water	mass	=	4	(gm)	density	=	0.25	(gm/cc)
	H2O
	G	=	-88084.8	(J)	H	=	-49767.8	(J)	S	=	37.45	(J/K)	V	=	15.77	(cc)	Cp	=	15.18	(J/K)
Total	solids	mass	=	9.88	(gm)	density	=	0.55	(gm/cc)
	G	=	-181427	(J)	H	=	-130920	(J)	S	=	49.37	(J/K)	V	=	18.06	(cc)	Cp	=	22.08	(J/K)
Summary	of	all	fractionated	phases:	(total	mass	=	72.22	grams)
olivine	mass	=	1.93	(gm)	density	=	3.97	(gm/cc)	(analysis	in	mole	%)
	(Ca0.00Mg0.27Fe''0.62Mn0.11Co0.00Ni0.00)2SiO4
	G	=	-19943.1	(J)	H	=	-16256.3	(J)	S	=	3.6	(J/K)	V	=	0.49	(cc)	Cp	=	1.91	(J/K)
	tephroite	fayalite	co-olivine	ni-olivine	monticellite	forsterite
	11.05	61.72	0	0	0.15	27.07
orthopyroxene	mass	=	2.35	(gm)	density	=	3.47	(gm/cc)	(analysis	in	mole	%)
	opx	Na0.00Ca0.03Fe''0.77Mg1.14Fe'''0.02Ti0.00Al0.11Si1.93O6
	G	=	-32170.9	(J)	H	=	-27503.9	(J)	S	=	4.56	(J/K)	V	=	0.68	(cc)	Cp	=	2.7	(J/K)
	diopside	clinoenstatit	hedenbergite	alumino-buffo	buffonite	essenite	jadeite
	-80.44	96.93	76.62	4.53	-4.32	6.53	0.16
feldspar	mass	=	61.56	(gm)	density	=	2.61	(gm/cc)	(analysis	in	mole	%)
	K0.10Na0.58Ca0.32Al1.32Si2.68O8
	G	=	-1.0014e+06	(J)	H	=	-870670	(J)	S	=	127.77	(J/K)	V	=	23.59	(cc)	Cp	=	74.2	(J/K)
	albite	anorthite	sanidine
	58.23	32.14	9.63
quartz	mass	=	0.53	(gm)	density	=	2.54	(gm/cc)
	SiO2
	G	=	-8710.24	(J)	H	=	-7642.09	(J)	S	=	1.04	(J/K)	V	=	0.21	(cc)	Cp	=	0.62	(J/K)
spinel	mass	=	5.51	(gm)	density	=	4.81	(gm/cc)	(analysis	in	mole	%)
	Fe''1.14Mg0.14Fe'''1.22Al0.22Cr0.00Ti0.28O4
	G	=	-40707.9	(J)	H	=	-30502.3	(J)	S	=	9.97	(J/K)	V	=	1.15	(cc)	Cp	=	4.97	(J/K)
	chromite	hercynite	magnetite	spinel	ulvospinel
	0	-3.17	60.98	14.16	28.03
rhm-oxide	mass	=	0.03	(gm)	density	=	4.67	(gm/cc)	(analysis	in	mole	%)
	Mn0.07Fe''0.72Mg0.08Fe'''0.16Al0.08Ti0.88O3
	G	=	-270.66	(J)	H	=	-219.62	(J)	S	=	0.05	(J/K)	V	=	0.01	(cc)	Cp	=	0.03	(J/K)
	geikielite	hematite	ilmenite	pyrophanite	corundum
	8.45	7.8	72.18	7.48	4.09
apatite	mass	=	0.31	(gm)	density	=	3.06	(gm/cc)
	Ca5(PO4)3OH
	G	=	-4551.66	(J)	H	=	-3920.2	(J)	S	=	0.62	(J/K)	V	=	0.1	(cc)	Cp	=	0.35	(J/K)
Viscosity	of	the	System	cannot	be	computed.
System	mass	=	100.14	(gm)	density	=	1.92	(gm/cc)
	G	=	-1.57978e+06	(J)	H	=	-1.3339e+06	(J)	S	=	240.32	(J/K)	V	=	52.24	(cc)	Cp	=	131.31	(J/K)
Oxygen	delta	moles	=	0.00426944	delta	grams	=	0.136617
	G	=	-967.07	(J)	H	=	100.37	(J)	S	=	1.04	(J/K)	V	=	363.19	(cc)	Cp	=	0.15	(J/K)
**********----------**********
Title:	Dummy	Title
T	=	740	(C)	P	=	1	(kbars)	log(10)	f	O2	=	-15.73	delta	HM	=	-5.67	NNO	=	-0.48	QFM	=	0	COH	=	1.5	IW	=	4.29
Constraint	Flags:	fO2	path	=	QFM	Fractionate	Solids
Liquid	mass	=	14.92	(gm)	density	=	2.28	(gm/cc)	viscosity	=	6.84	(log	10	poise)	(analysis	in	wt	%)
	G	=	-240060	(J)	H	=	-203995	(J)	S	=	35.6	(J/K)	V	=	6.55	(cc)	Cp	=	20.31	(J/K)
	SiO2	TiO2	Al2O3	Fe2O3	Cr2O3	FeO	MnO	MgO	NiO	CoO	CaO	Na2O	K2O	P2O5	H2O	CO2	SO3	Cl2O-1	F2O-1
	66.32	0.21	15.95	0.15	0	0.41	1.57	0.13	0	0	3.06	1.39	4.73	2.42	3.65	0	0	0	0
olivine	mass	=	0.06	(gm)	density	=	4.06	(gm/cc)	(analysis	in	mole	%)
	(Ca0.00Mg0.17Fe''0.60Mn0.24Co0.00Ni0.00)2SiO4
	G	=	-622.78	(J)	H	=	-504.53	(J)	S	=	0.12	(J/K)	V	=	0.02	(cc)	Cp	=	0.06	(J/K)
	tephroite	fayalite	co-olivine	ni-olivine	monticellite	forsterite
	23.51	59.92	0	0	0.05	16.52
feldspar	mass	=	1.74	(gm)	density	=	2.52	(gm/cc)	(analysis	in	mole	%)
	K0.52Na0.47Ca0.01Al1.01Si2.99O8
	G	=	-27649.8	(J)	H	=	-24009.8	(J)	S	=	3.59	(J/K)	V	=	0.69	(cc)	Cp	=	2.09	(J/K)
	albite	anorthite	sanidine
	47.16	1.17	51.67
quartz	mass	=	1.11	(gm)	density	=	2.54	(gm/cc)
	SiO2
	G	=	-18148.5	(J)	H	=	-15954.8	(J)	S	=	2.17	(J/K)	V	=	0.44	(cc)	Cp	=	1.28	(J/K)
rhm-oxide	mass	=	0.02	(gm)	density	=	4.66	(gm/cc)	(analysis	in	mole	%)
	Mn0.09Fe''0.70Mg0.09Fe'''0.13Al0.10Ti0.88O3
	G	=	-155.82	(J)	H	=	-127.08	(J)	S	=	0.03	(J/K)	V	=	0	(cc)	Cp	=	0.01	(J/K)
	geikielite	hematite	ilmenite	pyrophanite	corundum
	8.72	6.62	70.12	9.42	5.11
apatite	mass	=	0.09	(gm)	density	=	3.06	(gm/cc)
	Ca5(PO4)3OH
	G	=	-1333.48	(J)	H	=	-1151.05	(J)	S	=	0.18	(J/K)	V	=	0.03	(cc)	Cp	=	0.1	(J/K)
water	mass	=	4.1	(gm)	density	=	0.26	(gm/cc)
	H2O
	G	=	-90054.1	(J)	H	=	-51254.4	(J)	S	=	38.3	(J/K)	V	=	15.87	(cc)	Cp	=	15.82	(J/K)
Total	solids	mass	=	7.13	(gm)	density	=	0.42	(gm/cc)
	G	=	-137965	(J)	H	=	-93001.7	(J)	S	=	44.38	(J/K)	V	=	17.05	(cc)	Cp	=	19.37	(J/K)
Summary	of	all	fractionated	phases:	(total	mass	=	78.09	grams)
olivine	mass	=	2.06	(gm)	density	=	3.98	(gm/cc)	(analysis	in	mole	%)
	(Ca0.00Mg0.27Fe''0.62Mn0.12Co0.00Ni0.00)2SiO4
	G	=	-21140.4	(J)	H	=	-17273.6	(J)	S	=	3.82	(J/K)	V	=	0.52	(cc)	Cp	=	2.03	(J/K)
	tephroite	fayalite	co-olivine	ni-olivine	monticellite	forsterite
	11.64	61.76	0	0	0.15	26.46
orthopyroxene	mass	=	2.35	(gm)	density	=	3.47	(gm/cc)	(analysis	in	mole	%)
	opx	Na0.00Ca0.03Fe''0.77Mg1.14Fe'''0.02Ti0.00Al0.11Si1.93O6
	G	=	-32125.4	(J)	H	=	-27530.9	(J)	S	=	4.53	(J/K)	V	=	0.68	(cc)	Cp	=	2.7	(J/K)
	diopside	clinoenstatit	hedenbergite	alumino-buffo	buffonite	essenite	jadeite
	-80.44	96.93	76.62	4.53	-4.32	6.53	0.16
feldspar	mass	=	64.97	(gm)	density	=	2.61	(gm/cc)	(analysis	in	mole	%)
	K0.12Na0.58Ca0.31Al1.31Si2.69O8
	G	=	-1.05444e+06	(J)	H	=	-918505	(J)	S	=	134.17	(J/K)	V	=	24.93	(cc)	Cp	=	78.51	(J/K)
	albite	anorthite	sanidine
	57.81	30.52	11.67
quartz	mass	=	2.65	(gm)	density	=	2.54	(gm/cc)
	SiO2
	G	=	-43301.5	(J)	H	=	-38067.5	(J)	S	=	5.17	(J/K)	V	=	1.04	(cc)	Cp	=	3.06	(J/K)
spinel	mass	=	5.51	(gm)	density	=	4.81	(gm/cc)	(analysis	in	mole	%)
	Fe''1.14Mg0.14Fe'''1.22Al0.22Cr0.00Ti0.28O4
	G	=	-40608.4	(J)	H	=	-30552	(J)	S	=	9.93	(J/K)	V	=	1.15	(cc)	Cp	=	4.96	(J/K)
	chromite	hercynite	magnetite	spinel	ulvospinel
	0	-3.17	60.98	14.16	28.03
rhm-oxide	mass	=	0.05	(gm)	density	=	4.67	(gm/cc)	(analysis	in	mole	%)
	Mn0.08Fe''0.72Mg0.09Fe'''0.15Al0.09Ti0.88O3
	G	=	-520.97	(J)	H	=	-424.23	(J)	S	=	0.1	(J/K)	V	=	0.01	(cc)	Cp	=	0.05	(J/K)
	geikielite	hematite	ilmenite	pyrophanite	corundum
	8.5	7.45	71.64	8.06	4.35
apatite	mass	=	0.49	(gm)	density	=	3.06	(gm/cc)
	Ca5(PO4)3OH
	G	=	-7203.57	(J)	H	=	-6218.08	(J)	S	=	0.97	(J/K)	V	=	0.16	(cc)	Cp	=	0.55	(J/K)
Viscosity	of	the	System	cannot	be	computed.
System	mass	=	100.14	(gm)	density	=	1.92	(gm/cc)
	G	=	-1.57736e+06	(J)	H	=	-1.33557e+06	(J)	S	=	238.66	(J/K)	V	=	52.09	(cc)	Cp	=	131.54	(J/K)
Oxygen	delta	moles	=	0.00424487	delta	grams	=	0.135831
	G	=	-951.14	(J)	H	=	98.31	(J)	S	=	1.04	(J/K)	V	=	357.57	(cc)	Cp	=	0.15	(J/K)
**********----------**********
Title:	Dummy	Title
T	=	730	(C)	P	=	1	(kbars)	log(10)	f	O2	=	-15.97	delta	HM	=	-5.67	NNO	=	-0.47	QFM	=	0	COH	=	1.48	IW	=	4.31
Constraint	Flags:	fO2	path	=	QFM	Fractionate	Solids
Liquid	mass	=	12.97	(gm)	density	=	2.29	(gm/cc)	viscosity	=	6.85	(log	10	poise)	(analysis	in	wt	%)
	G	=	-208334	(J)	H	=	-177505	(J)	S	=	30.73	(J/K)	V	=	5.67	(cc)	Cp	=	17.72	(J/K)
	SiO2	TiO2	Al2O3	Fe2O3	Cr2O3	FeO	MnO	MgO	NiO	CoO	CaO	Na2O	K2O	P2O5	H2O	CO2	SO3	Cl2O-1	F2O-1
	65.22	0.2	16.77	0.13	0	0.35	1.75	0.13	0	0	3.29	1.18	4.66	2.63	3.69	0	0	0	0
olivine	mass	=	0.04	(gm)	density	=	4.06	(gm/cc)	(analysis	in	mole	%)
	(Ca0.00Mg0.16Fe''0.58Mn0.26Co0.00Ni0.00)2SiO4
	G	=	-379.68	(J)	H	=	-308.68	(J)	S	=	0.07	(J/K)	V	=	0.01	(cc)	Cp	=	0.04	(J/K)
	tephroite	fayalite	co-olivine	ni-olivine	monticellite	forsterite
	25.55	57.96	0	0	0.05	16.44
feldspar	mass	=	1.09	(gm)	density	=	2.52	(gm/cc)	(analysis	in	mole	%)
	K0.54Na0.45Ca0.01Al1.01Si2.99O8
	G	=	-17201.1	(J)	H	=	-14969.5	(J)	S	=	2.22	(J/K)	V	=	0.43	(cc)	Cp	=	1.3	(J/K)
	albite	anorthite	sanidine
	44.62	1.08	54.3
quartz	mass	=	0.71	(gm)	density	=	2.54	(gm/cc)
	SiO2
	G	=	-11629.9	(J)	H	=	-10244.6	(J)	S	=	1.38	(J/K)	V	=	0.28	(cc)	Cp	=	0.82	(J/K)
rhm-oxide	mass	=	0.01	(gm)	density	=	4.66	(gm/cc)	(analysis	in	mole	%)
	Mn0.10Fe''0.69Mg0.09Fe'''0.12Al0.11Ti0.88O3
	G	=	-110.63	(J)	H	=	-90.57	(J)	S	=	0.02	(J/K)	V	=	0	(cc)	Cp	=	0.01	(J/K)
	geikielite	hematite	ilmenite	pyrophanite	corundum
	8.87	6.24	69.35	9.96	5.57
apatite	mass	=	0.05	(gm)	density	=	3.06	(gm/cc)
	Ca5(PO4)3OH
	G	=	-770.98	(J)	H	=	-666.99	(J)	S	=	0.1	(J/K)	V	=	0.02	(cc)	Cp	=	0.06	(J/K)
water	mass	=	4.17	(gm)	density	=	0.26	(gm/cc)
	H2O
	G	=	-91103.3	(J)	H	=	-52234.5	(J)	S	=	38.75	(J/K)	V	=	15.79	(cc)	Cp	=	16.33	(J/K)
Total	solids	mass	=	6.07	(gm)	density	=	0.37	(gm/cc)
	G	=	-121196	(J)	H	=	-78514.8	(J)	S	=	42.55	(J/K)	V	=	16.53	(cc)	Cp	=	18.56	(J/K)
Summary	of	all	fractionated	phases:	(total	mass	=	81.1	grams)
olivine	mass	=	2.12	(gm)	density	=	3.98	(gm/cc)	(analysis	in	mole	%)
	(Ca0.00Mg0.26Fe''0.62Mn0.12Co0.00Ni0.00)2SiO4
	G	=	-21705.4	(J)	H	=	-17783.7	(J)	S	=	3.91	(J/K)	V	=	0.53	(cc)	Cp	=	2.09	(J/K)
	tephroite	fayalite	co-olivine	ni-olivine	monticellite	forsterite
	11.97	61.71	0	0	0.14	26.18
orthopyroxene	mass	=	2.35	(gm)	density	=	3.47	(gm/cc)	(analysis	in	mole	%)
	opx	Na0.00Ca0.03Fe''0.77Mg1.14Fe'''0.02Ti0.00Al0.11Si1.93O6
	G	=	-32080.2	(J)	H	=	-27557.8	(J)	S	=	4.51	(J/K)	V	=	0.68	(cc)	Cp	=	2.69	(J/K)
	diopside	clinoenstatit	hedenbergite	alumino-buffo	buffonite	essenite	jadeite
	-80.44	96.93	76.62	4.53	-4.32	6.53	0.16
feldspar	mass	=	66.71	(gm)	density	=	2.6	(gm/cc)	(analysis	in	mole	%)
	K0.13Na0.58Ca0.30Al1.30Si2.70O8
	G	=	-1.08067e+06	(J)	H	=	-943244	(J)	S	=	136.99	(J/K)	V	=	25.61	(cc)	Cp	=	80.93	(J/K)
	albite	anorthite	sanidine
	57.53	29.76	12.7
quartz	mass	=	3.76	(gm)	density	=	2.54	(gm/cc)
	SiO2
	G	=	-61367.1	(J)	H	=	-54057.1	(J)	S	=	7.29	(J/K)	V	=	1.48	(cc)	Cp	=	4.34	(J/K)
spinel	mass	=	5.51	(gm)	density	=	4.82	(gm/cc)	(analysis	in	mole	%)
	Fe''1.14Mg0.14Fe'''1.22Al0.22Cr0.00Ti0.28O4
	G	=	-40509.4	(J)	H	=	-30601.6	(J)	S	=	9.88	(J/K)	V	=	1.14	(cc)	Cp	=	4.96	(J/K)
	chromite	hercynite	magnetite	spinel	ulvospinel
	0	-3.17	60.98	14.16	28.03
rhm-oxide	mass	=	0.07	(gm)	density	=	4.67	(gm/cc)	(analysis	in	mole	%)
	Mn0.08Fe''0.71Mg0.09Fe'''0.15Al0.09Ti0.88O3
	G	=	-661.21	(J)	H	=	-540.22	(J)	S	=	0.12	(J/K)	V	=	0.01	(cc)	Cp	=	0.06	(J/K)
	geikielite	hematite	ilmenite	pyrophanite	corundum
	8.55	7.28	71.31	8.35	4.51
apatite	mass	=	0.58	(gm)	density	=	3.06	(gm/cc)
	Ca5(PO4)3OH
	G	=	-8452.4	(J)	H	=	-7312.32	(J)	S	=	1.14	(J/K)	V	=	0.19	(cc)	Cp	=	0.64	(J/K)
Viscosity	of	the	System	cannot	be	computed.
System	mass	=	100.14	(gm)	density	=	1.93	(gm/cc)
	G	=	-1.57497e+06	(J)	H	=	-1.33712e+06	(J)	S	=	237.11	(J/K)	V	=	51.85	(cc)	Cp	=	131.99	(J/K)
Oxygen	delta	moles	=	0.0042306	delta	grams	=	0.135374
	G	=	-937.63	(J)	H	=	96.5	(J)	S	=	1.03	(J/K)	V	=	352.85	(cc)	Cp	=	0.15	(J/K)
**********----------**********
Title:	Dummy	Title
T	=	720	(C)	P	=	1	(kbars)	log(10)	f	O2	=	-16.21	delta	HM	=	-5.68	NNO	=	-0.47	QFM	=	0	COH	=	1.46	IW	=	4.34
Constraint	Flags:	fO2	path	=	QFM	Fractionate	Solids
Liquid	mass	=	11.6	(gm)	density	=	2.29	(gm/cc)	viscosity	=	6.85	(log	10	poise)	(analysis	in	wt	%)
	G	=	-186111	(J)	H	=	-158979	(J)	S	=	27.32	(J/K)	V	=	5.06	(cc)	Cp	=	15.9	(J/K)
	SiO2	TiO2	Al2O3	Fe2O3	Cr2O3	FeO	MnO	MgO	NiO	CoO	CaO	Na2O	K2O	P2O5	H2O	CO2	SO3	Cl2O-1	F2O-1
	64.15	0.19	17.51	0.11	0	0.31	1.91	0.13	0	0	3.53	1	4.57	2.84	3.74	0	0	0	0
olivine	mass	=	0.03	(gm)	density	=	4.05	(gm/cc)	(analysis	in	mole	%)
	(Ca0.00Mg0.16Fe''0.56Mn0.27Co0.00Ni0.00)2SiO4
	G	=	-257.67	(J)	H	=	-210.22	(J)	S	=	0.05	(J/K)	V	=	0.01	(cc)	Cp	=	0.03	(J/K)
	tephroite	fayalite	co-olivine	ni-olivine	monticellite	forsterite
	27.24	56.3	0	0	0.04	16.42
feldspar	mass	=	0.76	(gm)	density	=	2.52	(gm/cc)	(analysis	in	mole	%)
	K0.57Na0.42Ca0.01Al1.01Si2.99O8
	G	=	-11956.6	(J)	H	=	-10428.3	(J)	S	=	1.54	(J/K)	V	=	0.3	(cc)	Cp	=	0.91	(J/K)
	albite	anorthite	sanidine
	42.27	1.03	56.7
quartz	mass	=	0.51	(gm)	density	=	2.54	(gm/cc)
	SiO2
	G	=	-8318.7	(J)	H	=	-7342.36	(J)	S	=	0.98	(J/K)	V	=	0.2	(cc)	Cp	=	0.59	(J/K)
rhm-oxide	mass	=	0.01	(gm)	density	=	4.65	(gm/cc)	(analysis	in	mole	%)
	Mn0.10Fe''0.69Mg0.09Fe'''0.12Al0.12Ti0.88O3
	G	=	-86.73	(J)	H	=	-71.27	(J)	S	=	0.02	(J/K)	V	=	0	(cc)	Cp	=	0.01	(J/K)
	geikielite	hematite	ilmenite	pyrophanite	corundum
	9.02	5.91	68.68	10.37	6.02
apatite	mass	=	0.03	(gm)	density	=	3.06	(gm/cc)
	Ca5(PO4)3OH
	G	=	-478.77	(J)	H	=	-415.11	(J)	S	=	0.06	(J/K)	V	=	0.01	(cc)	Cp	=	0.04	(J/K)
water	mass	=	4.21	(gm)	density	=	0.27	(gm/cc)
	H2O
	G	=	-91690	(J)	H	=	-52961.4	(J)	S	=	39	(J/K)	V	=	15.62	(cc)	Cp	=	16.78	(J/K)
Total	solids	mass	=	5.55	(gm)	density	=	0.34	(gm/cc)
	G	=	-112788	(J)	H	=	-71428.6	(J)	S	=	41.65	(J/K)	V	=	16.14	(cc)	Cp	=	18.35	(J/K)
Summary	of	all	fractionated	phases:	(total	mass	=	82.99	grams)
olivine	mass	=	2.16	(gm)	density	=	3.98	(gm/cc)	(analysis	in	mole	%)
	(Ca0.00Mg0.26Fe''0.62Mn0.12Co0.00Ni0.00)2SiO4
	G	=	-22026.8	(J)	H	=	-18098.2	(J)	S	=	3.96	(J/K)	V	=	0.54	(cc)	Cp	=	2.12	(J/K)
	tephroite	fayalite	co-olivine	ni-olivine	monticellite	forsterite
	12.2	61.64	0	0	0.14	26.02
orthopyroxene	mass	=	2.35	(gm)	density	=	3.47	(gm/cc)	(analysis	in	mole	%)
	opx	Na0.00Ca0.03Fe''0.77Mg1.14Fe'''0.02Ti0.00Al0.11Si1.93O6
	G	=	-32035.3	(J)	H	=	-27584.7	(J)	S	=	4.48	(J/K)	V	=	0.68	(cc)	Cp	=	2.69	(J/K)
	diopside	clinoenstatit	hedenbergite	alumino-buffo	buffonite	essenite	jadeite
	-80.44	96.93	76.62	4.53	-4.32	6.53	0.16
feldspar	mass	=	67.8	(gm)	density	=	2.6	(gm/cc)	(analysis	in	mole	%)
	K0.13Na0.57Ca0.29Al1.29Si2.71O8
	G	=	-1.09643e+06	(J)	H	=	-958973	(J)	S	=	138.41	(J/K)	V	=	26.03	(cc)	Cp	=	82.73	(J/K)
	albite	anorthite	sanidine
	57.33	29.31	13.36
quartz	mass	=	4.47	(gm)	density	=	2.54	(gm/cc)
	SiO2
	G	=	-72900.8	(J)	H	=	-64344.6	(J)	S	=	8.62	(J/K)	V	=	1.76	(cc)	Cp	=	5.16	(J/K)
spinel	mass	=	5.51	(gm)	density	=	4.82	(gm/cc)	(analysis	in	mole	%)
	Fe''1.14Mg0.14Fe'''1.22Al0.22Cr0.00Ti0.28O4
	G	=	-40410.9	(J)	H	=	-30651.1	(J)	S	=	9.83	(J/K)	V	=	1.14	(cc)	Cp	=	4.95	(J/K)
	chromite	hercynite	magnetite	spinel	ulvospinel
	0	-3.17	60.98	14.16	28.03
rhm-oxide	mass	=	0.08	(gm)	density	=	4.67	(gm/cc)	(analysis	in	mole	%)
	Mn0.09Fe''0.71Mg0.09Fe'''0.14Al0.09Ti0.88O3
	G	=	-756.08	(J)	H	=	-619.72	(J)	S	=	0.14	(J/K)	V	=	0.02	(cc)	Cp	=	0.07	(J/K)
	geikielite	hematite	ilmenite	pyrophanite	corundum
	8.59	7.15	71.07	8.55	4.64
apatite	mass	=	0.63	(gm)	density	=	3.06	(gm/cc)
	Ca5(PO4)3OH
	G	=	-9137.98	(J)	H	=	-7922.96	(J)	S	=	1.22	(J/K)	V	=	0.21	(cc)	Cp	=	0.69	(J/K)
Viscosity	of	the	System	cannot	be	computed.
System	mass	=	100.14	(gm)	density	=	1.94	(gm/cc)
	G	=	-1.5726e+06	(J)	H	=	-1.3386e+06	(J)	S	=	235.61	(J/K)	V	=	51.57	(cc)	Cp	=	132.67	(J/K)
Oxygen	delta	moles	=	0.00422133	delta	grams	=	0.135077
	G	=	-925.29	(J)	H	=	94.82	(J)	S	=	1.03	(J/K)	V	=	348.57	(cc)	Cp	=	0.15	(J/K)
**********----------**********
Title:	Dummy	Title
T	=	710	(C)	P	=	1	(kbars)	log(10)	f	O2	=	-16.46	delta	HM	=	-5.68	NNO	=	-0.46	QFM	=	0	COH	=	1.44	IW	=	4.36
Constraint	Flags:	fO2	path	=	QFM	Fractionate	Solids
Liquid	mass	=	10.57	(gm)	density	=	2.3	(gm/cc)	viscosity	=	6.83	(log	10	poise)	(analysis	in	wt	%)
	G	=	-169446	(J)	H	=	-145109	(J)	S	=	24.75	(J/K)	V	=	4.59	(cc)	Cp	=	14.55	(J/K)
	SiO2	TiO2	Al2O3	Fe2O3	Cr2O3	FeO	MnO	MgO	NiO	CoO	CaO	Na2O	K2O	P2O5	H2O	CO2	SO3	Cl2O-1	F2O-1
	63.1	0.19	18.2	0.1	0	0.27	2.06	0.13	0	0	3.78	0.86	4.47	3.06	3.79	0	0	0	0
olivine	mass	=	0.02	(gm)	density	=	4.05	(gm/cc)	(analysis	in	mole	%)
	(Ca0.00Mg0.16Fe''0.55Mn0.29Co0.00Ni0.00)2SiO4
	G	=	-186.42	(J)	H	=	-152.62	(J)	S	=	0.03	(J/K)	V	=	0	(cc)	Cp	=	0.02	(J/K)
	tephroite	fayalite	co-olivine	ni-olivine	monticellite	forsterite
	28.67	54.85	0	0	0.04	16.44
feldspar	mass	=	0.57	(gm)	density	=	2.52	(gm/cc)	(analysis	in	mole	%)
	K0.59Na0.40Ca0.01Al1.01Si2.99O8
	G	=	-8910.42	(J)	H	=	-7788.58	(J)	S	=	1.14	(J/K)	V	=	0.22	(cc)	Cp	=	0.68	(J/K)
	albite	anorthite	sanidine
	40.03	1	58.98
quartz	mass	=	0.39	(gm)	density	=	2.54	(gm/cc)
	SiO2
	G	=	-6373.95	(J)	H	=	-5637.01	(J)	S	=	0.75	(J/K)	V	=	0.15	(cc)	Cp	=	0.45	(J/K)
rhm-oxide	mass	=	0.01	(gm)	density	=	4.65	(gm/cc)	(analysis	in	mole	%)
	Mn0.11Fe''0.68Mg0.09Fe'''0.11Al0.13Ti0.88O3
	G	=	-72.12	(J)	H	=	-59.48	(J)	S	=	0.01	(J/K)	V	=	0	(cc)	Cp	=	0.01	(J/K)
	geikielite	hematite	ilmenite	pyrophanite	corundum
	9.16	5.62	68.1	10.68	6.46
apatite	mass	=	0.02	(gm)	density	=	3.06	(gm/cc)
	Ca5(PO4)3OH
	G	=	-299.58	(J)	H	=	-260.32	(J)	S	=	0.04	(J/K)	V	=	0.01	(cc)	Cp	=	0.02	(J/K)
water	mass	=	4.25	(gm)	density	=	0.28	(gm/cc)
	H2O
	G	=	-92006.9	(J)	H	=	-53541.6	(J)	S	=	39.13	(J/K)	V	=	15.39	(cc)	Cp	=	17.21	(J/K)
Total	solids	mass	=	5.25	(gm)	density	=	0.33	(gm/cc)
	G	=	-107849	(J)	H	=	-67439.6	(J)	S	=	41.1	(J/K)	V	=	15.78	(cc)	Cp	=	18.39	(J/K)
Summary	of	all	fractionated	phases:	(total	mass	=	84.32	grams)
olivine	mass	=	2.18	(gm)	density	=	3.99	(gm/cc)	(analysis	in	mole	%)
	(Ca0.00Mg0.26Fe''0.62Mn0.12Co0.00Ni0.00)2SiO4
	G	=	-22225.8	(J)	H	=	-18314.4	(J)	S	=	3.98	(J/K)	V	=	0.55	(cc)	Cp	=	2.14	(J/K)
	tephroite	fayalite	co-olivine	ni-olivine	monticellite	forsterite
	12.36	61.59	0	0	0.14	25.91
orthopyroxene	mass	=	2.35	(gm)	density	=	3.48	(gm/cc)	(analysis	in	mole	%)
	opx	Na0.00Ca0.03Fe''0.77Mg1.14Fe'''0.02Ti0.00Al0.11Si1.93O6
	G	=	-31990.6	(J)	H	=	-27611.6	(J)	S	=	4.45	(J/K)	V	=	0.68	(cc)	Cp	=	2.69	(J/K)
	diopside	clinoenstatit	hedenbergite	alumino-buffo	buffonite	essenite	jadeite
	-80.44	96.93	76.62	4.53	-4.32	6.53	0.16
feldspar	mass	=	68.55	(gm)	density	=	2.6	(gm/cc)	(analysis	in	mole	%)
	K0.14Na0.57Ca0.29Al1.29Si2.71O8
	G	=	-1.10695e+06	(J)	H	=	-970183	(J)	S	=	139.11	(J/K)	V	=	26.32	(cc)	Cp	=	84.35	(J/K)
	albite	anorthite	sanidine
	57.16	29	13.83
quartz	mass	=	4.98	(gm)	density	=	2.54	(gm/cc)
	SiO2
	G	=	-81114	(J)	H	=	-71735.7	(J)	S	=	9.54	(J/K)	V	=	1.96	(cc)	Cp	=	5.74	(J/K)
spinel	mass	=	5.51	(gm)	density	=	4.82	(gm/cc)	(analysis	in	mole	%)
	Fe''1.14Mg0.14Fe'''1.22Al0.22Cr0.00Ti0.28O4
	G	=	-40312.9	(J)	H	=	-30700.7	(J)	S	=	9.78	(J/K)	V	=	1.14	(cc)	Cp	=	4.95	(J/K)
	chromite	hercynite	magnetite	spinel	ulvospinel
	0	-3.17	60.98	14.16	28.03
rhm-oxide	mass	=	0.09	(gm)	density	=	4.67	(gm/cc)	(analysis	in	mole	%)
	Mn0.09Fe''0.71Mg0.09Fe'''0.14Al0.10Ti0.88O3
	G	=	-826.92	(J)	H	=	-679.94	(J)	S	=	0.15	(J/K)	V	=	0.02	(cc)	Cp	=	0.08	(J/K)
	geikielite	hematite	ilmenite	pyrophanite	corundum
	8.63	7.04	70.86	8.71	4.76
apatite	mass	=	0.66	(gm)	density	=	3.06	(gm/cc)
	Ca5(PO4)3OH
	G	=	-9530.96	(J)	H	=	-8281.97	(J)	S	=	1.27	(J/K)	V	=	0.21	(cc)	Cp	=	0.72	(J/K)
Viscosity	of	the	System	cannot	be	computed.
System	mass	=	100.14	(gm)	density	=	1.95	(gm/cc)
	G	=	-1.57024e+06	(J)	H	=	-1.34006e+06	(J)	S	=	234.14	(J/K)	V	=	51.26	(cc)	Cp	=	133.61	(J/K)
Oxygen	delta	moles	=	0.0042149	delta	grams	=	0.134872
	G	=	-913.64	(J)	H	=	93.21	(J)	S	=	1.02	(J/K)	V	=	344.53	(cc)	Cp	=	0.15	(J/K)
**********----------**********
Title:	Dummy	Title
T	=	700	(C)	P	=	1	(kbars)	log(10)	f	O2	=	-16.71	delta	HM	=	-5.69	NNO	=	-0.46	QFM	=	0	COH	=	1.41	IW	=	4.39
Constraint	Flags:	fO2	path	=	QFM	Fractionate	Solids
Liquid	mass	=	9.78	(gm)	density	=	2.31	(gm/cc)	viscosity	=	6.8	(log	10	poise)	(analysis	in	wt	%)
	G	=	-156482	(J)	H	=	-134341	(J)	S	=	22.75	(J/K)	V	=	4.23	(cc)	Cp	=	13.51	(J/K)
	SiO2	TiO2	Al2O3	Fe2O3	Cr2O3	FeO	MnO	MgO	NiO	CoO	CaO	Na2O	K2O	P2O5	H2O	CO2	SO3	Cl2O-1	F2O-1
	62.04	0.18	18.82	0.09	0	0.24	2.19	0.13	0	0	4.06	0.73	4.37	3.29	3.85	0	0	0	0
olivine	mass	=	0.01	(gm)	density	=	4.05	(gm/cc)	(analysis	in	mole	%)
	(Ca0.00Mg0.17Fe''0.54Mn0.30Co0.00Ni0.00)2SiO4
	G	=	-142.11	(J)	H	=	-116.74	(J)	S	=	0.03	(J/K)	V	=	0	(cc)	Cp	=	0.01	(J/K)
	tephroite	fayalite	co-olivine	ni-olivine	monticellite	forsterite
	29.87	53.61	0	0	0.04	16.48
feldspar	mass	=	0.42	(gm)	density	=	2.52	(gm/cc)	(analysis	in	mole	%)
	K0.62Na0.37Ca0.01Al1.01Si2.99O8
	G	=	-6628.19	(J)	H	=	-5806.51	(J)	S	=	0.84	(J/K)	V	=	0.17	(cc)	Cp	=	0.51	(J/K)
	albite	anorthite	sanidine
	37.37	0.94	61.68
feldspar	mass	=	0.02	(gm)	density	=	2.57	(gm/cc)	(analysis	in	mole	%)
	K0.09Na0.78Ca0.12Al1.12Si2.88O8
	G	=	-306.85	(J)	H	=	-269.21	(J)	S	=	0.04	(J/K)	V	=	0.01	(cc)	Cp	=	0.02	(J/K)
	albite	anorthite	sanidine
	78.46	12.44	9.1
quartz	mass	=	0.31	(gm)	density	=	2.54	(gm/cc)
	SiO2
	G	=	-5092.99	(J)	H	=	-4513.04	(J)	S	=	0.6	(J/K)	V	=	0.12	(cc)	Cp	=	0.36	(J/K)
rhm-oxide	mass	=	0.01	(gm)	density	=	4.65	(gm/cc)	(analysis	in	mole	%)
	Mn0.11Fe''0.68Mg0.09Fe'''0.11Al0.14Ti0.88O3
	G	=	-61.48	(J)	H	=	-50.88	(J)	S	=	0.01	(J/K)	V	=	0	(cc)	Cp	=	0.01	(J/K)
	geikielite	hematite	ilmenite	pyrophanite	corundum
	9.27	5.35	67.6	10.9	6.88
apatite	mass	=	0.01	(gm)	density	=	3.06	(gm/cc)
	Ca5(PO4)3OH
	G	=	-107.82	(J)	H	=	-93.9	(J)	S	=	0.01	(J/K)	V	=	0	(cc)	Cp	=	0.01	(J/K)
water	mass	=	4.27	(gm)	density	=	0.28	(gm/cc)
	H2O
	G	=	-92151.2	(J)	H	=	-54028.8	(J)	S	=	39.18	(J/K)	V	=	15.13	(cc)	Cp	=	17.64	(J/K)
Total	solids	mass	=	5.05	(gm)	density	=	0.33	(gm/cc)
	G	=	-104491	(J)	H	=	-64879.1	(J)	S	=	40.71	(J/K)	V	=	15.43	(cc)	Cp	=	18.56	(J/K)
Summary	of	all	fractionated	phases:	(total	mass	=	85.31	grams)
olivine	mass	=	2.2	(gm)	density	=	3.99	(gm/cc)	(analysis	in	mole	%)
	(Ca0.00Mg0.26Fe''0.62Mn0.12Co0.00Ni0.00)2SiO4
	G	=	-22353.5	(J)	H	=	-18473.1	(J)	S	=	3.99	(J/K)	V	=	0.55	(cc)	Cp	=	2.15	(J/K)
	tephroite	fayalite	co-olivine	ni-olivine	monticellite	forsterite
	12.48	61.54	0	0	0.14	25.84
orthopyroxene	mass	=	2.35	(gm)	density	=	3.48	(gm/cc)	(analysis	in	mole	%)
	opx	Na0.00Ca0.03Fe''0.77Mg1.14Fe'''0.02Ti0.00Al0.11Si1.93O6
	G	=	-31946.2	(J)	H	=	-27638.4	(J)	S	=	4.43	(J/K)	V	=	0.68	(cc)	Cp	=	2.68	(J/K)
	diopside	clinoenstatit	hedenbergite	alumino-buffo	buffonite	essenite	jadeite
	-80.44	96.93	76.62	4.53	-4.32	6.53	0.16
feldspar	mass	=	69.11	(gm)	density	=	2.6	(gm/cc)	(analysis	in	mole	%)
	K0.14Na0.57Ca0.29Al1.29Si2.71O8
	G	=	-1.11441e+06	(J)	H	=	-978773	(J)	S	=	139.38	(J

## Sheet: PFC3_FMQ-1_1MPa_isobaric
**********----------**********
Title:	Dummy	Title
T	=	1300	(C)	P	=	1	(kbars)	log(10)	f	O2	=	-8.18	delta	HM	=	-6.5	NNO	=	-1.69	QFM	=	-1	COH	=	1.27	IW	=	2.41
Constraint	Flags:	fO2	path	=	QFM-1	Fractionate	Solids
Liquid	mass	=	98.26	(gm)	density	=	2.47	(gm/cc)	viscosity	=	1.09	(log	10	poise)	(analysis	in	wt	%)
	G	=	-1.58035e+06	(J)	H	=	-1.11985e+06	(J)	S	=	292.73	(J/K)	V	=	39.78	(cc)	Cp	=	146.42	(J/K)
	SiO2	TiO2	Al2O3	Fe2O3	Cr2O3	FeO	MnO	MgO	NiO	CoO	CaO	Na2O	K2O	P2O5	H2O	CO2	SO3	Cl2O-1	F2O-1
	46.33	3.35	14.09	1.46	0	12.62	0.25	4.78	0	0	9.64	2.82	1.28	0.72	2.65	0	0	0	0
water	mass	=	0.1	(gm)	density	=	0.13	(gm/cc)
	H2O
	G	=	-2676.8	(J)	H	=	-1037.82	(J)	S	=	1.04	(J/K)	V	=	0.72	(cc)	Cp	=	0.29	(J/K)
Total	solids	mass	=	0.1	(gm)	density	=	0.13	(gm/cc)
	G	=	-2676.8	(J)	H	=	-1037.82	(J)	S	=	1.04	(J/K)	V	=	0.72	(cc)	Cp	=	0.29	(J/K)
Summary	of	all	fractionated	phases:	(total	mass	=	0	grams)
Viscosity	of	the	System:	1.13	(log	10	poise)
System	mass	=	98.36	(gm)	density	=	2.43	(gm/cc)
	G	=	-1.58303e+06	(J)	H	=	-1.12088e+06	(J)	S	=	293.77	(J/K)	V	=	40.51	(cc)	Cp	=	146.71	(J/K)
Oxygen	delta	moles	=	1.92902e-06	delta	grams	=	6.17263e-05
	G	=	-0.7	(J)	H	=	0.08	(J)	S	=	0	(J/K)	V	=	0.25	(cc)	Cp	=	0	(J/K)
**********----------**********
Title:	Dummy	Title
T	=	1290	(C)	P	=	1	(kbars)	log(10)	f	O2	=	-8.28	delta	HM	=	-6.5	NNO	=	-1.69	QFM	=	-1	COH	=	1.27	IW	=	2.42
Constraint	Flags:	fO2	path	=	QFM-1	Fractionate	Solids
Liquid	mass	=	98.27	(gm)	density	=	2.47	(gm/cc)	viscosity	=	1.13	(log	10	poise)	(analysis	in	wt	%)
	G	=	-1.57764e+06	(J)	H	=	-1.1214e+06	(J)	S	=	291.87	(J/K)	V	=	39.74	(cc)	Cp	=	146.43	(J/K)
	SiO2	TiO2	Al2O3	Fe2O3	Cr2O3	FeO	MnO	MgO	NiO	CoO	CaO	Na2O	K2O	P2O5	H2O	CO2	SO3	Cl2O-1	F2O-1
	46.32	3.35	14.09	1.47	0	12.62	0.25	4.78	0	0	9.64	2.82	1.28	0.72	2.66	0	0	0	0
water	mass	=	0.09	(gm)	density	=	0.14	(gm/cc)
	H2O
	G	=	-2468.44	(J)	H	=	-963.43	(J)	S	=	0.96	(J/K)	V	=	0.66	(cc)	Cp	=	0.27	(J/K)
Total	solids	mass	=	0.09	(gm)	density	=	0.14	(gm/cc)
	G	=	-2468.44	(J)	H	=	-963.43	(J)	S	=	0.96	(J/K)	V	=	0.66	(cc)	Cp	=	0.27	(J/K)
Summary	of	all	fractionated	phases:	(total	mass	=	0	grams)
Viscosity	of	the	System:	1.15	(log	10	poise)
System	mass	=	98.36	(gm)	density	=	2.43	(gm/cc)
	G	=	-1.5801e+06	(J)	H	=	-1.12236e+06	(J)	S	=	292.83	(J/K)	V	=	40.4	(cc)	Cp	=	146.7	(J/K)
Oxygen	delta	moles	=	1.53929e-05	delta	grams	=	0.000492554
	G	=	-5.58	(J)	H	=	0.66	(J)	S	=	0	(J/K)	V	=	2	(cc)	Cp	=	0	(J/K)
**********----------**********
Title:	Dummy	Title
T	=	1280	(C)	P	=	1	(kbars)	log(10)	f	O2	=	-8.38	delta	HM	=	-6.5	NNO	=	-1.68	QFM	=	-1	COH	=	1.26	IW	=	2.43
Constraint	Flags:	fO2	path	=	QFM-1	Fractionate	Solids
Liquid	mass	=	98.28	(gm)	density	=	2.48	(gm/cc)	viscosity	=	1.16	(log	10	poise)	(analysis	in	wt	%)
	G	=	-1.57493e+06	(J)	H	=	-1.12295e+06	(J)	S	=	291.01	(J/K)	V	=	39.69	(cc)	Cp	=	146.45	(J/K)
	SiO2	TiO2	Al2O3	Fe2O3	Cr2O3	FeO	MnO	MgO	NiO	CoO	CaO	Na2O	K2O	P2O5	H2O	CO2	SO3	Cl2O-1	F2O-1
	46.32	3.35	14.09	1.47	0	12.61	0.25	4.78	0	0	9.64	2.82	1.28	0.72	2.66	0	0	0	0
water	mass	=	0.08	(gm)	density	=	0.14	(gm/cc)
	H2O
	G	=	-2258.46	(J)	H	=	-887.37	(J)	S	=	0.88	(J/K)	V	=	0.61	(cc)	Cp	=	0.24	(J/K)
Total	solids	mass	=	0.08	(gm)	density	=	0.14	(gm/cc)
	G	=	-2258.46	(J)	H	=	-887.37	(J)	S	=	0.88	(J/K)	V	=	0.61	(cc)	Cp	=	0.24	(J/K)
Summary	of	all	fractionated	phases:	(total	mass	=	0	grams)
Viscosity	of	the	System:	1.18	(log	10	poise)
System	mass	=	98.36	(gm)	density	=	2.44	(gm/cc)
	G	=	-1.57719e+06	(J)	H	=	-1.12384e+06	(J)	S	=	291.89	(J/K)	V	=	40.3	(cc)	Cp	=	146.69	(J/K)
Oxygen	delta	moles	=	2.96342e-05	delta	grams	=	0.00094826
	G	=	-10.68	(J)	H	=	1.26	(J)	S	=	0.01	(J/K)	V	=	3.83	(cc)	Cp	=	0	(J/K)
**********----------**********
Title:	Dummy	Title
T	=	1270	(C)	P	=	1	(kbars)	log(10)	f	O2	=	-8.48	delta	HM	=	-6.5	NNO	=	-1.68	QFM	=	-1	COH	=	1.25	IW	=	2.44
Constraint	Flags:	fO2	path	=	QFM-1	Fractionate	Solids
Liquid	mass	=	98.29	(gm)	density	=	2.48	(gm/cc)	viscosity	=	1.19	(log	10	poise)	(analysis	in	wt	%)
	G	=	-1.57224e+06	(J)	H	=	-1.1245e+06	(J)	S	=	290.14	(J/K)	V	=	39.65	(cc)	Cp	=	146.46	(J/K)
	SiO2	TiO2	Al2O3	Fe2O3	Cr2O3	FeO	MnO	MgO	NiO	CoO	CaO	Na2O	K2O	P2O5	H2O	CO2	SO3	Cl2O-1	F2O-1
	46.31	3.35	14.09	1.48	0	12.61	0.25	4.78	0	0	9.64	2.82	1.28	0.72	2.67	0	0	0	0
water	mass	=	0.08	(gm)	density	=	0.14	(gm/cc)
	H2O
	G	=	-2046.84	(J)	H	=	-809.6	(J)	S	=	0.8	(J/K)	V	=	0.55	(cc)	Cp	=	0.22	(J/K)
Total	solids	mass	=	0.08	(gm)	density	=	0.14	(gm/cc)
	G	=	-2046.84	(J)	H	=	-809.6	(J)	S	=	0.8	(J/K)	V	=	0.55	(cc)	Cp	=	0.22	(J/K)
Summary	of	all	fractionated	phases:	(total	mass	=	0	grams)
Viscosity	of	the	System:	1.21	(log	10	poise)
System	mass	=	98.36	(gm)	density	=	2.45	(gm/cc)
	G	=	-1.57428e+06	(J)	H	=	-1.12531e+06	(J)	S	=	290.94	(J/K)	V	=	40.2	(cc)	Cp	=	146.68	(J/K)
Oxygen	delta	moles	=	4.46775e-05	delta	grams	=	0.00142963
	G	=	-15.98	(J)	H	=	1.88	(J)	S	=	0.01	(J/K)	V	=	5.73	(cc)	Cp	=	0	(J/K)
**********----------**********
Title:	Dummy	Title
T	=	1260	(C)	P	=	1	(kbars)	log(10)	f	O2	=	-8.58	delta	HM	=	-6.51	NNO	=	-1.68	QFM	=	-1	COH	=	1.24	IW	=	2.45
Constraint	Flags:	fO2	path	=	QFM-1	Fractionate	Solids
Liquid	mass	=	98.29	(gm)	density	=	2.48	(gm/cc)	viscosity	=	1.22	(log	10	poise)	(analysis	in	wt	%)
	G	=	-1.56956e+06	(J)	H	=	-1.12606e+06	(J)	S	=	289.27	(J/K)	V	=	39.6	(cc)	Cp	=	146.47	(J/K)
	SiO2	TiO2	Al2O3	Fe2O3	Cr2O3	FeO	MnO	MgO	NiO	CoO	CaO	Na2O	K2O	P2O5	H2O	CO2	SO3	Cl2O-1	F2O-1
	46.31	3.35	14.09	1.48	0	12.6	0.25	4.78	0	0	9.63	2.82	1.28	0.72	2.68	0	0	0	0
water	mass	=	0.07	(gm)	density	=	0.14	(gm/cc)
	H2O
	G	=	-1833.55	(J)	H	=	-730.09	(J)	S	=	0.72	(J/K)	V	=	0.49	(cc)	Cp	=	0.2	(J/K)
Total	solids	mass	=	0.07	(gm)	density	=	0.14	(gm/cc)
	G	=	-1833.55	(J)	H	=	-730.09	(J)	S	=	0.72	(J/K)	V	=	0.49	(cc)	Cp	=	0.2	(J/K)
Summary	of	all	fractionated	phases:	(total	mass	=	0	grams)
Viscosity	of	the	System:	1.24	(log	10	poise)
System	mass	=	98.36	(gm)	density	=	2.45	(gm/cc)
	G	=	-1.57139e+06	(J)	H	=	-1.12679e+06	(J)	S	=	289.99	(J/K)	V	=	40.09	(cc)	Cp	=	146.67	(J/K)
Oxygen	delta	moles	=	6.05483e-05	delta	grams	=	0.00193747
	G	=	-21.5	(J)	H	=	2.53	(J)	S	=	0.02	(J/K)	V	=	7.72	(cc)	Cp	=	0	(J/K)
**********----------**********
Title:	Dummy	Title
T	=	1250	(C)	P	=	1	(kbars)	log(10)	f	O2	=	-8.68	delta	HM	=	-6.51	NNO	=	-1.68	QFM	=	-1	COH	=	1.23	IW	=	2.46
Constraint	Flags:	fO2	path	=	QFM-1	Fractionate	Solids
Liquid	mass	=	98.3	(gm)	density	=	2.48	(gm/cc)	viscosity	=	1.25	(log	10	poise)	(analysis	in	wt	%)
	G	=	-1.56689e+06	(J)	H	=	-1.12762e+06	(J)	S	=	288.39	(J/K)	V	=	39.56	(cc)	Cp	=	146.49	(J/K)
	SiO2	TiO2	Al2O3	Fe2O3	Cr2O3	FeO	MnO	MgO	NiO	CoO	CaO	Na2O	K2O	P2O5	H2O	CO2	SO3	Cl2O-1	F2O-1
	46.31	3.35	14.09	1.49	0	12.59	0.25	4.78	0	0	9.63	2.82	1.28	0.72	2.69	0	0	0	0
water	mass	=	0.06	(gm)	density	=	0.14	(gm/cc)
	H2O
	G	=	-1618.56	(J)	H	=	-648.79	(J)	S	=	0.64	(J/K)	V	=	0.43	(cc)	Cp	=	0.18	(J/K)
Total	solids	mass	=	0.06	(gm)	density	=	0.14	(gm/cc)
	G	=	-1618.56	(J)	H	=	-648.79	(J)	S	=	0.64	(J/K)	V	=	0.43	(cc)	Cp	=	0.18	(J/K)
Summary	of	all	fractionated	phases:	(total	mass	=	0	grams)
Viscosity	of	the	System:	1.27	(log	10	poise)
System	mass	=	98.36	(gm)	density	=	2.46	(gm/cc)
	G	=	-1568504	(J)	H	=	-1.12827e+06	(J)	S	=	289.03	(J/K)	V	=	39.99	(cc)	Cp	=	146.67	(J/K)
Oxygen	delta	moles	=	7.72733e-05	delta	grams	=	0.00247265
	G	=	-27.24	(J)	H	=	3.2	(J)	S	=	0.02	(J/K)	V	=	9.79	(cc)	Cp	=	0	(J/K)
**********----------**********
Title:	Dummy	Title
T	=	1240	(C)	P	=	1	(kbars)	log(10)	f	O2	=	-8.79	delta	HM	=	-6.51	NNO	=	-1.67	QFM	=	-1	COH	=	1.22	IW	=	2.47
Constraint	Flags:	fO2	path	=	QFM-1	Fractionate	Solids
Liquid	mass	=	98.31	(gm)	density	=	2.49	(gm/cc)	viscosity	=	1.28	(log	10	poise)	(analysis	in	wt	%)
	G	=	-1.56423e+06	(J)	H	=	-1129182	(J)	S	=	287.51	(J/K)	V	=	39.51	(cc)	Cp	=	146.5	(J/K)
	SiO2	TiO2	Al2O3	Fe2O3	Cr2O3	FeO	MnO	MgO	NiO	CoO	CaO	Na2O	K2O	P2O5	H2O	CO2	SO3	Cl2O-1	F2O-1
	46.3	3.35	14.09	1.49	0	12.59	0.25	4.78	0	0	9.63	2.82	1.28	0.72	2.69	0	0	0	0
water	mass	=	0.05	(gm)	density	=	0.14	(gm/cc)
	H2O
	G	=	-1401.84	(J)	H	=	-565.69	(J)	S	=	0.55	(J/K)	V	=	0.37	(cc)	Cp	=	0.15	(J/K)
Total	solids	mass	=	0.05	(gm)	density	=	0.14	(gm/cc)
	G	=	-1401.84	(J)	H	=	-565.69	(J)	S	=	0.55	(J/K)	V	=	0.37	(cc)	Cp	=	0.15	(J/K)
Summary	of	all	fractionated	phases:	(total	mass	=	0	grams)
Viscosity	of	the	System:	1.3	(log	10	poise)
System	mass	=	98.36	(gm)	density	=	2.47	(gm/cc)
	G	=	-1565629	(J)	H	=	-1.12975e+06	(J)	S	=	288.06	(J/K)	V	=	39.88	(cc)	Cp	=	146.66	(J/K)
Oxygen	delta	moles	=	9.48807e-05	delta	grams	=	0.00303607
	G	=	-33.2	(J)	H	=	3.9	(J)	S	=	0.02	(J/K)	V	=	11.94	(cc)	Cp	=	0	(J/K)
**********----------**********
Title:	Dummy	Title
T	=	1230	(C)	P	=	1	(kbars)	log(10)	f	O2	=	-8.9	delta	HM	=	-6.51	NNO	=	-1.67	QFM	=	-1	COH	=	1.21	IW	=	2.48
Constraint	Flags:	fO2	path	=	QFM-1	Fractionate	Solids
Liquid	mass	=	98.32	(gm)	density	=	2.49	(gm/cc)	viscosity	=	1.32	(log	10	poise)	(analysis	in	wt	%)
	G	=	-1.56158e+06	(J)	H	=	-1.13075e+06	(J)	S	=	286.62	(J/K)	V	=	39.47	(cc)	Cp	=	146.52	(J/K)
	SiO2	TiO2	Al2O3	Fe2O3	Cr2O3	FeO	MnO	MgO	NiO	CoO	CaO	Na2O	K2O	P2O5	H2O	CO2	SO3	Cl2O-1	F2O-1
	46.3	3.35	14.09	1.5	0	12.58	0.25	4.78	0	0	9.63	2.82	1.28	0.72	2.7	0	0	0	0
water	mass	=	0.04	(gm)	density	=	0.14	(gm/cc)
	H2O
	G	=	-1183.37	(J)	H	=	-480.72	(J)	S	=	0.47	(J/K)	V	=	0.31	(cc)	Cp	=	0.13	(J/K)
Total	solids	mass	=	0.04	(gm)	density	=	0.14	(gm/cc)
	G	=	-1183.37	(J)	H	=	-480.72	(J)	S	=	0.47	(J/K)	V	=	0.31	(cc)	Cp	=	0.13	(J/K)
Summary	of	all	fractionated	phases:	(total	mass	=	0	grams)
Viscosity	of	the	System:	1.33	(log	10	poise)
System	mass	=	98.36	(gm)	density	=	2.47	(gm/cc)
	G	=	-1.56276e+06	(J)	H	=	-1.13123e+06	(J)	S	=	287.09	(J/K)	V	=	39.78	(cc)	Cp	=	146.65	(J/K)
Oxygen	delta	moles	=	0.0001134	delta	grams	=	0.00362865
	G	=	-39.38	(J)	H	=	4.62	(J)	S	=	0.03	(J/K)	V	=	14.17	(cc)	Cp	=	0	(J/K)
**********----------**********
Title:	Dummy	Title
T	=	1220	(C)	P	=	1	(kbars)	log(10)	f	O2	=	-9.01	delta	HM	=	-6.51	NNO	=	-1.67	QFM	=	-1	COH	=	1.2	IW	=	2.5
Constraint	Flags:	fO2	path	=	QFM-1	Fractionate	Solids
Liquid	mass	=	98.33	(gm)	density	=	2.49	(gm/cc)	viscosity	=	1.35	(log	10	poise)	(analysis	in	wt	%)
	G	=	-1.55895e+06	(J)	H	=	-1.13231e+06	(J)	S	=	285.73	(J/K)	V	=	39.43	(cc)	Cp	=	146.53	(J/K)
	SiO2	TiO2	Al2O3	Fe2O3	Cr2O3	FeO	MnO	MgO	NiO	CoO	CaO	Na2O	K2O	P2O5	H2O	CO2	SO3	Cl2O-1	F2O-1
	46.29	3.35	14.09	1.5	0	12.57	0.25	4.78	0	0	9.63	2.82	1.28	0.72	2.71	0	0	0	0
water	mass	=	0.04	(gm)	density	=	0.14	(gm/cc)
	H2O
	G	=	-963.11	(J)	H	=	-393.87	(J)	S	=	0.38	(J/K)	V	=	0.25	(cc)	Cp	=	0.11	(J/K)
Total	solids	mass	=	0.04	(gm)	density	=	0.14	(gm/cc)
	G	=	-963.11	(J)	H	=	-393.87	(J)	S	=	0.38	(J/K)	V	=	0.25	(cc)	Cp	=	0.11	(J/K)
Summary	of	all	fractionated	phases:	(total	mass	=	0	grams)
Viscosity	of	the	System:	1.36	(log	10	poise)
System	mass	=	98.36	(gm)	density	=	2.48	(gm/cc)
	G	=	-1.55991e+06	(J)	H	=	-1.13271e+06	(J)	S	=	286.11	(J/K)	V	=	39.68	(cc)	Cp	=	146.64	(J/K)
Oxygen	delta	moles	=	0.000132861	delta	grams	=	0.00425139
	G	=	-45.8	(J)	H	=	5.36	(J)	S	=	0.03	(J/K)	V	=	16.49	(cc)	Cp	=	0	(J/K)
**********----------**********
Title:	Dummy	Title
T	=	1210	(C)	P	=	1	(kbars)	log(10)	f	O2	=	-9.12	delta	HM	=	-6.52	NNO	=	-1.67	QFM	=	-1	COH	=	1.19	IW	=	2.51
Constraint	Flags:	fO2	path	=	QFM-1	Fractionate	Solids
Liquid	mass	=	98.34	(gm)	density	=	2.5	(gm/cc)	viscosity	=	1.38	(log	10	poise)	(analysis	in	wt	%)
	G	=	-1.55632e+06	(J)	H	=	-1.13388e+06	(J)	S	=	284.83	(J/K)	V	=	39.38	(cc)	Cp	=	146.55	(J/K)
	SiO2	TiO2	Al2O3	Fe2O3	Cr2O3	FeO	MnO	MgO	NiO	CoO	CaO	Na2O	K2O	P2O5	H2O	CO2	SO3	Cl2O-1	F2O-1
	46.29	3.35	14.08	1.51	0	12.57	0.25	4.78	0	0	9.63	2.82	1.28	0.72	2.72	0	0	0	0
water	mass	=	0.03	(gm)	density	=	0.14	(gm/cc)
	H2O
	G	=	-741.04	(J)	H	=	-305.09	(J)	S	=	0.29	(J/K)	V	=	0.19	(cc)	Cp	=	0.08	(J/K)
Total	solids	mass	=	0.03	(gm)	density	=	0.14	(gm/cc)
	G	=	-741.04	(J)	H	=	-305.09	(J)	S	=	0.29	(J/K)	V	=	0.19	(cc)	Cp	=	0.08	(J/K)
Summary	of	all	fractionated	phases:	(total	mass	=	0	grams)
Viscosity	of	the	System:	1.39	(log	10	poise)
System	mass	=	98.36	(gm)	density	=	2.49	(gm/cc)
	G	=	-1.55707e+06	(J)	H	=	-1.13418e+06	(J)	S	=	285.12	(J/K)	V	=	39.57	(cc)	Cp	=	146.63	(J/K)
Oxygen	delta	moles	=	0.000153296	delta	grams	=	0.0049053
	G	=	-52.45	(J)	H	=	6.13	(J)	S	=	0.04	(J/K)	V	=	18.9	(cc)	Cp	=	0.01	(J/K)
**********----------**********
Title:	Dummy	Title
T	=	1200	(C)	P	=	1	(kbars)	log(10)	f	O2	=	-9.23	delta	HM	=	-6.52	NNO	=	-1.66	QFM	=	-1	COH	=	1.18	IW	=	2.52
Constraint	Flags:	fO2	path	=	QFM-1	Fractionate	Solids
Liquid	mass	=	98.35	(gm)	density	=	2.5	(gm/cc)	viscosity	=	1.42	(log	10	poise)	(analysis	in	wt	%)
	G	=	-1.55371e+06	(J)	H	=	-1.13543e+06	(J)	S	=	283.94	(J/K)	V	=	39.34	(cc)	Cp	=	143.48	(J/K)
	SiO2	TiO2	Al2O3	Fe2O3	Cr2O3	FeO	MnO	MgO	NiO	CoO	CaO	Na2O	K2O	P2O5	H2O	CO2	SO3	Cl2O-1	F2O-1
	46.29	3.35	14.08	1.52	0	12.56	0.25	4.78	0	0	9.63	2.82	1.28	0.72	2.73	0	0	0	0
water	mass	=	0.02	(gm)	density	=	0.15	(gm/cc)
	H2O
	G	=	-517.13	(J)	H	=	-214.33	(J)	S	=	0.21	(J/K)	V	=	0.13	(cc)	Cp	=	0.06	(J/K)
Total	solids	mass	=	0.02	(gm)	density	=	0.15	(gm/cc)
	G	=	-517.13	(J)	H	=	-214.33	(J)	S	=	0.21	(J/K)	V	=	0.13	(cc)	Cp	=	0.06	(J/K)
Summary	of	all	fractionated	phases:	(total	mass	=	0	grams)
Viscosity	of	the	System:	1.43	(log	10	poise)
System	mass	=	98.36	(gm)	density	=	2.49	(gm/cc)
	G	=	-1554232	(J)	H	=	-1.13564e+06	(J)	S	=	284.15	(J/K)	V	=	39.47	(cc)	Cp	=	143.54	(J/K)
Oxygen	delta	moles	=	0.00017474	delta	grams	=	0.00559146
	G	=	-59.33	(J)	H	=	6.92	(J)	S	=	0.04	(J/K)	V	=	21.4	(cc)	Cp	=	0.01	(J/K)
**********----------**********
Title:	Dummy	Title
T	=	1190	(C)	P	=	1	(kbars)	log(10)	f	O2	=	-9.34	delta	HM	=	-6.52	NNO	=	-1.66	QFM	=	-1	COH	=	1.17	IW	=	2.53
Constraint	Flags:	fO2	path	=	QFM-1	Fractionate	Solids
Liquid	mass	=	98.35	(gm)	density	=	2.5	(gm/cc)	viscosity	=	1.45	(log	10	poise)	(analysis	in	wt	%)
	G	=	-1.55112e+06	(J)	H	=	-1.13697e+06	(J)	S	=	283.05	(J/K)	V	=	39.29	(cc)	Cp	=	143.49	(J/K)
	SiO2	TiO2	Al2O3	Fe2O3	Cr2O3	FeO	MnO	MgO	NiO	CoO	CaO	Na2O	K2O	P2O5	H2O	CO2	SO3	Cl2O-1	F2O-1
	46.28	3.35	14.08	1.52	0	12.55	0.25	4.78	0	0	9.63	2.82	1.28	0.72	2.73	0	0	0	0
water	mass	=	0.01	(gm)	density	=	0.15	(gm/cc)
	H2O
	G	=	-291.35	(J)	H	=	-121.56	(J)	S	=	0.12	(J/K)	V	=	0.08	(cc)	Cp	=	0.03	(J/K)
Total	solids	mass	=	0.01	(gm)	density	=	0.15	(gm/cc)
	G	=	-291.35	(J)	H	=	-121.56	(J)	S	=	0.12	(J/K)	V	=	0.08	(cc)	Cp	=	0.03	(J/K)
Summary	of	all	fractionated	phases:	(total	mass	=	0	grams)
Viscosity	of	the	System:	1.46	(log	10	poise)
System	mass	=	98.37	(gm)	density	=	2.5	(gm/cc)
	G	=	-1.55141e+06	(J)	H	=	-1.13709e+06	(J)	S	=	283.17	(J/K)	V	=	39.37	(cc)	Cp	=	143.52	(J/K)
Oxygen	delta	moles	=	0.000197226	delta	grams	=	0.006311
	G	=	-66.46	(J)	H	=	7.74	(J)	S	=	0.05	(J/K)	V	=	23.99	(cc)	Cp	=	0.01	(J/K)
**********----------**********
Title:	Dummy	Title
T	=	1180	(C)	P	=	1	(kbars)	log(10)	f	O2	=	-9.45	delta	HM	=	-6.52	NNO	=	-1.66	QFM	=	-1	COH	=	1.16	IW	=	2.54
Constraint	Flags:	fO2	path	=	QFM-1	Fractionate	Solids
Liquid	mass	=	98.36	(gm)	density	=	2.51	(gm/cc)	viscosity	=	1.49	(log	10	poise)	(analysis	in	wt	%)
	G	=	-1.54853e+06	(J)	H	=	-1.13852e+06	(J)	S	=	282.16	(J/K)	V	=	39.25	(cc)	Cp	=	143.5	(J/K)
	SiO2	TiO2	Al2O3	Fe2O3	Cr2O3	FeO	MnO	MgO	NiO	CoO	CaO	Na2O	K2O	P2O5	H2O	CO2	SO3	Cl2O-1	F2O-1
	46.28	3.34	14.08	1.53	0	12.54	0.25	4.78	0	0	9.63	2.82	1.28	0.72	2.74	0	0	0	0
water	mass	=	0	(gm)	density	=	0.15	(gm/cc)
	H2O
	G	=	-63.66	(J)	H	=	-26.74	(J)	S	=	0.03	(J/K)	V	=	0.02	(cc)	Cp	=	0.01	(J/K)
Total	solids	mass	=	0	(gm)	density	=	0.15	(gm/cc)
	G	=	-63.66	(J)	H	=	-26.74	(J)	S	=	0.03	(J/K)	V	=	0.02	(cc)	Cp	=	0.01	(J/K)
Summary	of	all	fractionated	phases:	(total	mass	=	0	grams)
Viscosity	of	the	System:	1.49	(log	10	poise)
System	mass	=	98.37	(gm)	density	=	2.51	(gm/cc)
	G	=	-1.5486e+06	(J)	H	=	-1.13854e+06	(J)	S	=	282.18	(J/K)	V	=	39.27	(cc)	Cp	=	143.5	(J/K)
Oxygen	delta	moles	=	0.000220793	delta	grams	=	0.0070651
	G	=	-73.84	(J)	H	=	8.58	(J)	S	=	0.06	(J/K)	V	=	26.68	(cc)	Cp	=	0.01	(J/K)
**********----------**********
Title:	Dummy	Title
T	=	1170	(C)	P	=	1	(kbars)	log(10)	f	O2	=	-9.57	delta	HM	=	-6.53	NNO	=	-1.66	QFM	=	-1	COH	=	1.15	IW	=	2.55
Constraint	Flags:	fO2	path	=	QFM-1	Fractionate	Solids
Liquid	mass	=	98.37	(gm)	density	=	2.51	(gm/cc)	viscosity	=	1.53	(log	10	poise)	(analysis	in	wt	%)
	G	=	-1.54579e+06	(J)	H	=	-1.13999e+06	(J)	S	=	281.19	(J/K)	V	=	39.19	(cc)	Cp	=	143.49	(J/K)
	SiO2	TiO2	Al2O3	Fe2O3	Cr2O3	FeO	MnO	MgO	NiO	CoO	CaO	Na2O	K2O	P2O5	H2O	CO2	SO3	Cl2O-1	F2O-1
	46.28	3.34	14.08	1.54	0	12.54	0.25	4.78	0	0	9.63	2.82	1.28	0.72	2.74	0	0	0	0
Total	solids	mass	=	0	(gm)	density	=	0	(gm/cc)
	G	=	0	(J)	H	=	0	(J)	S	=	0	(J/K)	V	=	0	(cc)	Cp	=	0	(J/K)
Summary	of	all	fractionated	phases:	(total	mass	=	0	grams)
Viscosity	of	the	System:	1.53	(log	10	poise)
System	mass	=	98.37	(gm)	density	=	2.51	(gm/cc)
	G	=	-1.54579e+06	(J)	H	=	-1.13999e+06	(J)	S	=	281.19	(J/K)	V	=	39.19	(cc)	Cp	=	143.49	(J/K)
Oxygen	delta	moles	=	0.00024561	delta	grams	=	0.00785921
	G	=	-81.51	(J)	H	=	9.46	(J)	S	=	0.06	(J/K)	V	=	29.47	(cc)	Cp	=	0.01	(J/K)
**********----------**********
Title:	Dummy	Title
T	=	1160	(C)	P	=	1	(kbars)	log(10)	f	O2	=	-9.69	delta	HM	=	-6.53	NNO	=	-1.65	QFM	=	-1	COH	=	1.14	IW	=	2.57
Constraint	Flags:	fO2	path	=	QFM-1	Fractionate	Solids
Liquid	mass	=	98.37	(gm)	density	=	2.51	(gm/cc)	viscosity	=	1.56	(log	10	poise)	(analysis	in	wt	%)
	G	=	-1.543e+06	(J)	H	=	-1.14144e+06	(J)	S	=	280.2	(J/K)	V	=	39.14	(cc)	Cp	=	143.47	(J/K)
	SiO2	TiO2	Al2O3	Fe2O3	Cr2O3	FeO	MnO	MgO	NiO	CoO	CaO	Na2O	K2O	P2O5	H2O	CO2	SO3	Cl2O-1	F2O-1
	46.28	3.34	14.08	1.55	0	12.53	0.25	4.78	0	0	9.63	2.82	1.28	0.72	2.74	0	0	0	0
Total	solids	mass	=	0	(gm)	density	=	0	(gm/cc)
	G	=	0	(J)	H	=	0	(J)	S	=	0	(J/K)	V	=	0	(cc)	Cp	=	0	(J/K)
Summary	of	all	fractionated	phases:	(total	mass	=	0	grams)
Viscosity	of	the	System:	1.56	(log	10	poise)
System	mass	=	98.37	(gm)	density	=	2.51	(gm/cc)
	G	=	-1.543e+06	(J)	H	=	-1.14144e+06	(J)	S	=	280.2	(J/K)	V	=	39.14	(cc)	Cp	=	143.47	(J/K)
Oxygen	delta	moles	=	0.00027164	delta	grams	=	0.00869217
	G	=	-89.45	(J)	H	=	10.36	(J)	S	=	0.07	(J/K)	V	=	32.37	(cc)	Cp	=	0.01	(J/K)
**********----------**********
Title:	Dummy	Title
T	=	1150	(C)	P	=	1	(kbars)	log(10)	f	O2	=	-9.81	delta	HM	=	-6.53	NNO	=	-1.65	QFM	=	-1	COH	=	1.13	IW	=	2.58
Constraint	Flags:	fO2	path	=	QFM-1	Fractionate	Solids
Liquid	mass	=	98.37	(gm)	density	=	2.52	(gm/cc)	viscosity	=	1.6	(log	10	poise)	(analysis	in	wt	%)
	G	=	-1.54022e+06	(J)	H	=	-1.14289e+06	(J)	S	=	279.19	(J/K)	V	=	39.08	(cc)	Cp	=	143.46	(J/K)
	SiO2	TiO2	Al2O3	Fe2O3	Cr2O3	FeO	MnO	MgO	NiO	CoO	CaO	Na2O	K2O	P2O5	H2O	CO2	SO3	Cl2O-1	F2O-1
	46.27	3.34	14.08	1.56	0	12.52	0.25	4.78	0	0	9.63	2.82	1.28	0.72	2.74	0	0	0	0
Total	solids	mass	=	0	(gm)	density	=	0	(gm/cc)
	G	=	0	(J)	H	=	0	(J)	S	=	0	(J/K)	V	=	0	(cc)	Cp	=	0	(J/K)
Summary	of	all	fractionated	phases:	(total	mass	=	0	grams)
Viscosity	of	the	System:	1.6	(log	10	poise)
System	mass	=	98.37	(gm)	density	=	2.52	(gm/cc)
	G	=	-1.54022e+06	(J)	H	=	-1.14289e+06	(J)	S	=	279.19	(J/K)	V	=	39.08	(cc)	Cp	=	143.46	(J/K)
Oxygen	delta	moles	=	0.000298878	delta	grams	=	0.00956374
	G	=	-97.65	(J)	H	=	11.29	(J)	S	=	0.08	(J/K)	V	=	35.36	(cc)	Cp	=	0.01	(J/K)
**********----------**********
Title:	Dummy	Title
T	=	1140	(C)	P	=	1	(kbars)	log(10)	f	O2	=	-9.93	delta	HM	=	-6.53	NNO	=	-1.65	QFM	=	-1	COH	=	1.12	IW	=	2.59
Constraint	Flags:	fO2	path	=	QFM-1	Fractionate	Solids
Liquid	mass	=	98.37	(gm)	density	=	2.52	(gm/cc)	viscosity	=	1.64	(log	10	poise)	(analysis	in	wt	%)
	G	=	-1.53745e+06	(J)	H	=	-1.14434e+06	(J)	S	=	278.18	(J/K)	V	=	39.02	(cc)	Cp	=	143.44	(J/K)
	SiO2	TiO2	Al2O3	Fe2O3	Cr2O3	FeO	MnO	MgO	NiO	CoO	CaO	Na2O	K2O	P2O5	H2O	CO2	SO3	Cl2O-1	F2O-1
	46.27	3.34	14.08	1.57	0	12.51	0.25	4.78	0	0	9.63	2.82	1.28	0.72	2.74	0	0	0	0
Total	solids	mass	=	0	(gm)	density	=	0	(gm/cc)
	G	=	0	(J)	H	=	0	(J)	S	=	0	(J/K)	V	=	0	(cc)	Cp	=	0	(J/K)
Summary	of	all	fractionated	phases:	(total	mass	=	0	grams)
Viscosity	of	the	System:	1.64	(log	10	poise)
System	mass	=	98.37	(gm)	density	=	2.52	(gm/cc)
	G	=	-1.53745e+06	(J)	H	=	-1.14434e+06	(J)	S	=	278.18	(J/K)	V	=	39.02	(cc)	Cp	=	143.44	(J/K)
Oxygen	delta	moles	=	0.000327368	delta	grams	=	0.0104754
	G	=	-106.12	(J)	H	=	12.25	(J)	S	=	0.08	(J/K)	V	=	38.46	(cc)	Cp	=	0.01	(J/K)
**********----------**********
Title:	Dummy	Title
T	=	1130	(C)	P	=	1	(kbars)	log(10)	f	O2	=	-10.05	delta	HM	=	-6.54	NNO	=	-1.64	QFM	=	-1	COH	=	1.11	IW	=	2.6
Constraint	Flags:	fO2	path	=	QFM-1	Fractionate	Solids
Liquid	mass	=	98.37	(gm)	density	=	2.52	(gm/cc)	viscosity	=	1.68	(log	10	poise)	(analysis	in	wt	%)
	G	=	-1.53469e+06	(J)	H	=	-1.14578e+06	(J)	S	=	277.17	(J/K)	V	=	38.96	(cc)	Cp	=	143.43	(J/K)
	SiO2	TiO2	Al2O3	Fe2O3	Cr2O3	FeO	MnO	MgO	NiO	CoO	CaO	Na2O	K2O	P2O5	H2O	CO2	SO3	Cl2O-1	F2O-1
	46.27	3.34	14.08	1.58	0	12.5	0.25	4.78	0	0	9.63	2.82	1.28	0.72	2.74	0	0	0	0
Total	solids	mass	=	0	(gm)	density	=	0	(gm/cc)
	G	=	0	(J)	H	=	0	(J)	S	=	0	(J/K)	V	=	0	(cc)	Cp	=	0	(J/K)
Summary	of	all	fractionated	phases:	(total	mass	=	0	grams)
Viscosity	of	the	System:	1.68	(log	10	poise)
System	mass	=	98.37	(gm)	density	=	2.52	(gm/cc)
	G	=	-1.53469e+06	(J)	H	=	-1.14578e+06	(J)	S	=	277.17	(J/K)	V	=	38.96	(cc)	Cp	=	143.43	(J/K)
Oxygen	delta	moles	=	0.000357156	delta	grams	=	0.0114286
	G	=	-114.86	(J)	H	=	13.23	(J)	S	=	0.09	(J/K)	V	=	41.67	(cc)	Cp	=	0.01	(J/K)
**********----------**********
Title:	Dummy	Title
T	=	1120	(C)	P	=	1	(kbars)	log(10)	f	O2	=	-10.18	delta	HM	=	-6.54	NNO	=	-1.64	QFM	=	-1	COH	=	1.09	IW	=	2.62
Constraint	Flags:	fO2	path	=	QFM-1	Fractionate	Solids
Liquid	mass	=	98.37	(gm)	density	=	2.53	(gm/cc)	viscosity	=	1.72	(log	10	poise)	(analysis	in	wt	%)
	G	=	-1.53194e+06	(J)	H	=	-1.14723e+06	(J)	S	=	276.14	(J/K)	V	=	38.91	(cc)	Cp	=	143.41	(J/K)
	SiO2	TiO2	Al2O3	Fe2O3	Cr2O3	FeO	MnO	MgO	NiO	CoO	CaO	Na2O	K2O	P2O5	H2O	CO2	SO3	Cl2O-1	F2O-1
	46.27	3.34	14.08	1.59	0	12.49	0.25	4.78	0	0	9.63	2.82	1.28	0.72	2.74	0	0	0	0
Total	solids	mass	=	0	(gm)	density	=	0	(gm/cc)
	G	=	0	(J)	H	=	0	(J)	S	=	0	(J/K)	V	=	0	(cc)	Cp	=	0	(J/K)
Summary	of	all	fractionated	phases:	(total	mass	=	0	grams)
Viscosity	of	the	System:	1.72	(log	10	poise)
System	mass	=	98.37	(gm)	density	=	2.53	(gm/cc)
	G	=	-1.53194e+06	(J)	H	=	-1.14723e+06	(J)	S	=	276.14	(J/K)	V	=	38.91	(cc)	Cp	=	143.41	(J/K)
Oxygen	delta	moles	=	0.000388294	delta	grams	=	0.0124249
	G	=	-123.88	(J)	H	=	14.25	(J)	S	=	0.1	(J/K)	V	=	44.98	(cc)	Cp	=	0.01	(J/K)
**********----------**********
Title:	Dummy	Title
T	=	1110	(C)	P	=	1	(kbars)	log(10)	f	O2	=	-10.3	delta	HM	=	-6.54	NNO	=	-1.64	QFM	=	-1	COH	=	1.08	IW	=	2.63
Constraint	Flags:	fO2	path	=	QFM-1	Fractionate	Solids
Liquid	mass	=	98.37	(gm)	density	=	2.53	(gm/cc)	viscosity	=	1.76	(log	10	poise)	(analysis	in	wt	%)
	G	=	-1.52921e+06	(J)	H	=	-1.14868e+06	(J)	S	=	275.11	(J/K)	V	=	38.85	(cc)	Cp	=	143.39	(J/K)
	SiO2	TiO2	Al2O3	Fe2O3	Cr2O3	FeO	MnO	MgO	NiO	CoO	CaO	Na2O	K2O	P2O5	H2O	CO2	SO3	Cl2O-1	F2O-1
	46.27	3.34	14.08	1.6	0	12.48	0.25	4.78	0	0	9.63	2.82	1.28	0.72	2.74	0	0	0	0
Total	solids	mass	=	0	(gm)	density	=	0	(gm/cc)
	G	=	0	(J)	H	=	0	(J)	S	=	0	(J/K)	V	=	0	(cc)	Cp	=	0	(J/K)
Summary	of	all	fractionated	phases:	(total	mass	=	0	grams)
Viscosity	of	the	System:	1.76	(log	10	poise)
System	mass	=	98.37	(gm)	density	=	2.53	(gm/cc)
	G	=	-1.52921e+06	(J)	H	=	-1.14868e+06	(J)	S	=	275.11	(J/K)	V	=	38.85	(cc)	Cp	=	143.39	(J/K)
Oxygen	delta	moles	=	0.000420832	delta	grams	=	0.0134661
	G	=	-133.19	(J)	H	=	15.29	(J)	S	=	0.11	(J/K)	V	=	48.4	(cc)	Cp	=	0.02	(J/K)
**********----------**********
Title:	Dummy	Title
T	=	1100	(C)	P	=	1	(kbars)	log(10)	f	O2	=	-10.43	delta	HM	=	-6.54	NNO	=	-1.63	QFM	=	-1	COH	=	1.07	IW	=	2.64
Constraint	Flags:	fO2	path	=	QFM-1	Fractionate	Solids
Liquid	mass	=	97.9	(gm)	density	=	2.53	(gm/cc)	viscosity	=	1.83	(log	10	poise)	(analysis	in	wt	%)
	G	=	-1.52104e+06	(J)	H	=	-1.14635e+06	(J)	S	=	272.87	(J/K)	V	=	38.68	(cc)	Cp	=	142.7	(J/K)
	SiO2	TiO2	Al2O3	Fe2O3	Cr2O3	FeO	MnO	MgO	NiO	CoO	CaO	Na2O	K2O	P2O5	H2O	CO2	SO3	Cl2O-1	F2O-1
	46.5	3.12	14.12	1.6	0	12.38	0.25	4.76	0	0	9.67	2.83	1.29	0.73	2.76	0	0	0	0
rhm-oxide	mass	=	0.48	(gm)	density	=	4.38	(gm/cc)	(analysis	in	mole	%)
	Mn0.01Fe''0.58Mg0.29Fe'''0.09Al0.14Ti0.88O3
	G	=	-5465.97	(J)	H	=	-4094.76	(J)	S	=	1	(J/K)	V	=	0.11	(cc)	Cp	=	0.47	(J/K)
	geikielite	hematite	ilmenite	pyrophanite	corundum
	28.74	4.74	58.26	1.06	7.2
Total	solids	mass	=	0.48	(gm)	density	=	4.38	(gm/cc)
	G	=	-5465.97	(J)	H	=	-4094.76	(J)	S	=	1	(J/K)	V	=	0.11	(cc)	Cp	=	0.47	(J/K)
Summary	of	all	fractionated	phases:	(total	mass	=	0	grams)
Viscosity	of	the	System:	1.83	(log	10	poise)
System	mass	=	98.37	(gm)	density	=	2.54	(gm/cc)
	G	=	-1.5265e+06	(J)	H	=	-1.15044e+06	(J)	S	=	273.87	(J/K)	V	=	38.79	(cc)	Cp	=	143.17	(J/K)
Oxygen	delta	moles	=	0.000491118	delta	grams	=	0.0157152
	G	=	-154.19	(J)	H	=	17.66	(J)	S	=	0.13	(J/K)	V	=	56.07	(cc)	Cp	=	0.02	(J/K)
**********----------**********
Title:	Dummy	Title
T	=	1090	(C)	P	=	1	(kbars)	log(10)	f	O2	=	-10.56	delta	HM	=	-6.55	NNO	=	-1.63	QFM	=	-1	COH	=	1.06	IW	=	2.65
Constraint	Flags:	fO2	path	=	QFM-1	Fractionate	Solids
Liquid	mass	=	96.54	(gm)	density	=	2.52	(gm/cc)	viscosity	=	1.92	(log	10	poise)	(analysis	in	wt	%)
	G	=	-1.50373e+06	(J)	H	=	-1.13781e+06	(J)	S	=	268.44	(J/K)	V	=	38.29	(cc)	Cp	=	140.73	(J/K)
	SiO2	TiO2	Al2O3	Fe2O3	Cr2O3	FeO	MnO	MgO	NiO	CoO	CaO	Na2O	K2O	P2O5	H2O	CO2	SO3	Cl2O-1	F2O-1
	47.03	2.84	14.27	1.57	0	11.89	0.26	4.62	0	0	9.81	2.87	1.31	0.74	2.8	0	0	0	0
olivine	mass	=	0.3	(gm)	density	=	3.44	(gm/cc)	(analysis	in	mole	%)
	(Ca0.01Mg0.71Fe''0.29Mn0.00Co0.00Ni0.00)2SiO4
	G	=	-4313.83	(J)	H	=	-3372.98	(J)	S	=	0.69	(J/K)	V	=	0.09	(cc)	Cp	=	0.35	(J/K)
	tephroite	fayalite	co-olivine	ni-olivine	monticellite	forsterite
	0.46	28.79	0	0	1.19	69.55
spinel	mass	=	1.07	(gm)	density	=	4.44	(gm/cc)	(analysis	in	mole	%)
	Fe''1.28Mg0.46Fe'''0.35Al0.17Cr0.00Ti0.74O4
	G	=	-10460.1	(J)	H	=	-7336.1	(J)	S	=	2.29	(J/K)	V	=	0.24	(cc)	Cp	=	1.04	(J/K)
	chromite	hercynite	magnetite	spinel	ulvospinel
	0	-38	17.61	46.41	73.98
Total	solids	mass	=	1.37	(gm)	density	=	4.17	(gm/cc)
	G	=	-14773.9	(J)	H	=	-10709.1	(J)	S	=	2.98	(J/K)	V	=	0.33	(cc)	Cp	=	1.39	(J/K)
Summary	of	all	fractionated	phases:	(total	mass	=	0.47	grams)
rhm-oxide	mass	=	0.47	(gm)	density	=	4.38	(gm/cc)	(analysis	in	mole	%)
	Mn0.01Fe''0.58Mg0.29Fe'''0.09Al0.14Ti0.88O3
	G	=	-5440.03	(J)	H	=	-4087.43	(J)	S	=	0.99	(J/K)	V	=	0.11	(cc)	Cp	=	0.47	(J/K)
	geikielite	hematite	ilmenite	pyrophanite	corundum
	28.74	4.74	58.26	1.06	7.2
Viscosity	of	the	System:	1.94	(log	10	poise)
System	mass	=	98.38	(gm)	density	=	2.54	(gm/cc)
	G	=	-1.52395e+06	(J)	H	=	-1.15261e+06	(J)	S	=	272.41	(J/K)	V	=	38.73	(cc)	Cp	=	142.59	(J/K)
Oxygen	delta	moles	=	0.000788973	delta	grams	=	0.0252462
	G	=	-245.69	(J)	H	=	28.09	(J)	S	=	0.2	(J/K)	V	=	89.42	(cc)	Cp	=	0.03	(J/K)
**********----------**********
Title:	Dummy	Title
T	=	1080	(C)	P	=	1	(kbars)	log(10)	f	O2	=	-10.69	delta	HM	=	-6.55	NNO	=	-1.63	QFM	=	-1	COH	=	1.05	IW	=	2.67
Constraint	Flags:	fO2	path	=	QFM-1	Fractionate	Solids
Liquid	mass	=	95.04	(gm)	density	=	2.51	(gm/cc)	viscosity	=	2.02	(log	10	poise)	(analysis	in	wt	%)
	G	=	-1.4832e+06	(J)	H	=	-1.12645e+06	(J)	S	=	263.64	(J/K)	V	=	37.84	(cc)	Cp	=	138.45	(J/K)
	SiO2	TiO2	Al2O3	Fe2O3	Cr2O3	FeO	MnO	MgO	NiO	CoO	CaO	Na2O	K2O	P2O5	H2O	CO2	SO3	Cl2O-1	F2O-1
	47.48	2.66	14.47	1.55	0	11.46	0.26	4.35	0	0	9.96	2.91	1.33	0.75	2.84	0	0	0	0
olivine	mass	=	0.75	(gm)	density	=	3.45	(gm/cc)	(analysis	in	mole	%)
	(Ca0.01Mg0.70Fe''0.30Mn0.00Co0.00Ni0.00)2SiO4
	G	=	-10723.6	(J)	H	=	-8395.05	(J)	S	=	1.72	(J/K)	V	=	0.22	(cc)	Cp	=	0.89	(J/K)
	tephroite	fayalite	co-olivine	ni-olivine	monticellite	forsterite
	0.48	29.77	0	0	1.25	68.5
spinel	mass	=	0.75	(gm)	density	=	4.46	(gm/cc)	(analysis	in	mole	%)
	Fe''1.29Mg0.44Fe'''0.36Al0.17Cr0.00Ti0.73O4
	G	=	-7279.64	(J)	H	=	-5109.3	(J)	S	=	1.6	(J/K)	V	=	0.17	(cc)	Cp	=	0.73	(J/K)
	chromite	hercynite	magnetite	spinel	ulvospinel
	0	-35.75	18.24	44.18	73.34
Total	solids	mass	=	1.51	(gm)	density	=	3.89	(gm/cc)
	G	=	-18003.2	(J)	H	=	-13504.4	(J)	S	=	3.32	(J/K)	V	=	0.39	(cc)	Cp	=	1.61	(J/K)
Summary	of	all	fractionated	phases:	(total	mass	=	1.84	grams)
olivine	mass	=	0.3	(gm)	density	=	3.44	(gm/cc)	(analysis	in	mole	%)
	(Ca0.01Mg0.71Fe''0.29Mn0.00Co0.00Ni0.00)2SiO4
	G	=	-4284.14	(J)	H	=	-3358.65	(J)	S	=	0.68	(J/K)	V	=	0.09	(cc)	Cp	=	0.35	(J/K)
	tephroite	fayalite	co-olivine	ni-olivine	monticellite	forsterite
	0.46	28.79	0	0	1.19	69.55
spinel	mass	=	1.07	(gm)	density	=	4.44	(gm/cc)	(analysis	in	mole	%)
	Fe''1.28Mg0.46Fe'''0.35Al0.17Cr0.00Ti0.74O4
	G	=	-10417.1	(J)	H	=	-7332.31	(J)	S	=	2.28	(J/K)	V	=	0.24	(cc)	Cp	=	1.03	(J/K)
	chromite	hercynite	magnetite	spinel	ulvospinel
	0	-38	17.61	46.41	73.98
rhm-oxide	mass	=	0.47	(gm)	density	=	4.38	(gm/cc)	(analysis	in	mole	%)
	Mn0.01Fe''0.58Mg0.29Fe'''0.09Al0.14Ti0.88O3
	G	=	-5430.12	(J)	H	=	-4092.1	(J)	S	=	0.99	(J/K)	V	=	0.11	(cc)	Cp	=	0.47	(J/K)
	geikielite	hematite	ilmenite	pyrophanite	corundum
	28.74	4.74	58.26	1.06	7.2
Viscosity	of	the	System:	2.06	(log	10	poise)
System	mass	=	98.39	(gm)	density	=	2.54	(gm/cc)
	G	=	-1.52134e+06	(J)	H	=	-1.15474e+06	(J)	S	=	270.92	(J/K)	V	=	38.66	(cc)	Cp	=	141.91	(J/K)
Oxygen	delta	moles	=	0.000972221	delta	grams	=	0.0311099
	G	=	-300.28	(J)	H	=	34.27	(J)	S	=	0.25	(J/K)	V	=	109.38	(cc)	Cp	=	0.04	(J/K)
**********----------**********
Title:	Dummy	Title
T	=	1070	(C)	P	=	1	(kbars)	log(10)	f	O2	=	-10.83	delta	HM	=	-6.55	NNO	=	-1.62	QFM	=	-1	COH	=	1.04	IW	=	2.68
Constraint	Flags:	fO2	path	=	QFM-1	Fractionate	Solids
Liquid	mass	=	92.02	(gm)	density	=	2.5	(gm/cc)	viscosity	=	2.12	(log	10	poise)	(analysis	in	wt	%)
	G	=	-1.43965e+06	(J)	H	=	-1.09708e+06	(J)	S	=	255.05	(J/K)	V	=	36.87	(cc)	Cp	=	133.91	(J/K)
	SiO2	TiO2	Al2O3	Fe2O3	Cr2O3	FeO	MnO	MgO	NiO	CoO	CaO	Na2O	K2O	P2O5	H2O	CO2	SO3	Cl2O-1	F2O-1
	48.02	2.41	14.78	1.51	0	11.04	0.26	4.01	0	0	9.88	3.01	1.37	0.77	2.93	0	0	0	0
olivine	mass	=	0.43	(gm)	density	=	3.47	(gm/cc)	(analysis	in	mole	%)
	(Ca0.01Mg0.68Fe''0.31Mn0.01Co0.00Ni0.00)2SiO4
	G	=	-6117.69	(J)	H	=	-4792.98	(J)	S	=	0.99	(J/K)	V	=	0.13	(cc)	Cp	=	0.51	(J/K)
	tephroite	fayalite	co-olivine	ni-olivine	monticellite	forsterite
	0.52	31.07	0	0	1.28	67.14
clinopyroxene	mass	=	1.66	(gm)	density	=	3.31	(gm/cc)	(analysis	in	mole	%)
	cpx	Na0.01Ca0.89Fe''0.20Mg0.72Fe'''0.05Ti0.10Al0.30Si1.74O6
	G	=	-26021.9	(J)	H	=	-21082	(J)	S	=	3.68	(J/K)	V	=	0.5	(cc)	Cp	=	1.91	(J/K)
	diopside	clinoenstatit	hedenbergite	alumino-buffo	buffonite	essenite	jadeite
	42.38	9.83	20.02	21.39	-2.15	7.22	1.31
spinel	mass	=	0.94	(gm)	density	=	4.48	(gm/cc)	(analysis	in	mole	%)
	Fe''1.31Mg0.42Fe'''0.38Al0.17Cr0.00Ti0.72O4
	G	=	-8991.25	(J)	H	=	-6311.82	(J)	S	=	1.99	(J/K)	V	=	0.21	(cc)	Cp	=	0.9	(J/K)
	chromite	hercynite	magnetite	spinel	ulvospinel
	0	-33	19.09	41.51	72.4
Total	solids	mass	=	3.03	(gm)	density	=	3.63	(gm/cc)
	G	=	-41130.8	(J)	H	=	-32186.8	(J)	S	=	6.66	(J/K)	V	=	0.84	(cc)	Cp	=	3.32	(J/K)
Summary	of	all	fractionated	phases:	(total	mass	=	3.34	grams)
olivine	mass	=	1.05	(gm)	density	=	3.45	(gm/cc)	(analysis	in	mole	%)
	(Ca0.01Mg0.70Fe''0.29Mn0.00Co0.00Ni0.00)2SiO4
	G	=	-14961	(J)	H	=	-11748.3	(J)	S	=	2.39	(J/K)	V	=	0.31	(cc)	Cp	=	1.24	(J/K)
	tephroite	fayalite	co-olivine	ni-olivine	monticellite	forsterite
	0.47	29.49	0	0	1.23	68.8
spinel	mass	=	1.82	(gm)	density	=	4.45	(gm/cc)	(analysis	in	mole	%)
	Fe''1.28Mg0.45Fe'''0.36Al0.17Cr0.00Ti0.74O4
	G	=	-17638	(J)	H	=	-12445.1	(J)	S	=	3.87	(J/K)	V	=	0.41	(cc)	Cp	=	1.76	(J/K)
	chromite	hercynite	magnetite	spinel	ulvospinel
	0	-37.07	17.87	45.49	73.72
rhm-oxide	mass	=	0.47	(gm)	density	=	4.38	(gm/cc)	(analysis	in	mole	%)
	Mn0.01Fe''0.58Mg0.29Fe'''0.09Al0.14Ti0.88O3
	G	=	-5420.25	(J)	H	=	-4096.76	(J)	S	=	0.99	(J/K)	V	=	0.11	(cc)	Cp	=	0.47	(J/K)
	geikielite	hematite	ilmenite	pyrophanite	corundum
	28.74	4.74	58.26	1.06	7.2
Viscosity	of	the	System:	2.2	(log	10	poise)
System	mass	=	98.4	(gm)	density	=	2.55	(gm/cc)
	G	=	-1.5188e+06	(J)	H	=	-1.15756e+06	(J)	S	=	268.95	(J/K)	V	=	38.53	(cc)	Cp	=	140.69	(J/K)
Oxygen	delta	moles	=	0.00125517	delta	grams	=	0.0401638
	G	=	-384.48	(J)	H	=	43.79	(J)	S	=	0.32	(J/K)	V	=	140.17	(cc)	Cp	=	0.05	(J/K)
**********----------**********
Title:	Dummy	Title
T	=	1060	(C)	P	=	1	(kbars)	log(10)	f	O2	=	-10.96	delta	HM	=	-6.55	NNO	=	-1.62	QFM	=	-1	COH	=	1.02	IW	=	2.7
Constraint	Flags:	fO2	path	=	QFM-1	Fractionate	Solids
Liquid	mass	=	86.68	(gm)	density	=	2.47	(gm/cc)	viscosity	=	2.23	(log	10	poise)	(analysis	in	wt	%)
	G	=	-1.36056e+06	(J)	H	=	-1.03971e+06	(J)	S	=	240.67	(J/K)	V	=	35.09	(cc)	Cp	=	125.89	(J/K)
	SiO2	TiO2	Al2O3	Fe2O3	Cr2O3	FeO	MnO	MgO	NiO	CoO	CaO	Na2O	K2O	P2O5	H2O	CO2	SO3	Cl2O-1	F2O-1
	48.72	2.04	15.3	1.47	0	10.65	0.28	3.55	0	0	9.42	3.18	1.45	0.82	3.11	0	0	0	0
clinopyroxene	mass	=	4.23	(gm)	density	=	3.31	(gm/cc)	(analysis	in	mole	%)
	cpx	Na0.01Ca0.89Fe''0.21Mg0.71Fe'''0.05Ti0.09Al0.30Si1.74O6
	G	=	-66201	(J)	H	=	-53730	(J)	S	=	9.35	(J/K)	V	=	1.28	(cc)	Cp	=	4.87	(J/K)
	diopside	clinoenstatit	hedenbergite	alumino-buffo	buffonite	essenite	jadeite
	41.33	9.97	21.13	21.07	-2.48	7.65	1.33
spinel	mass	=	1.13	(gm)	density	=	4.51	(gm/cc)	(analysis	in	mole	%)
	Fe''1.33Mg0.38Fe'''0.41Al0.17Cr0.00Ti0.71O4
	G	=	-10671.7	(J)	H	=	-7483.21	(J)	S	=	2.39	(J/K)	V	=	0.25	(cc)	Cp	=	1.08	(J/K)
	chromite	hercynite	magnetite	spinel	ulvospinel
	0	-29.09	20.4	37.81	70.88
Total	solids	mass	=	5.36	(gm)	density	=	3.51	(gm/cc)
	G	=	-76872.8	(J)	H	=	-61213.2	(J)	S	=	11.75	(J/K)	V	=	1.53	(cc)	Cp	=	5.95	(J/K)
Summary	of	all	fractionated	phases:	(total	mass	=	6.37	grams)
olivine	mass	=	1.49	(gm)	density	=	3.46	(gm/cc)	(analysis	in	mole	%)
	(Ca0.01Mg0.70Fe''0.30Mn0.00Co0.00Ni0.00)2SiO4
	G	=	-21022.5	(J)	H	=	-16540.9	(J)	S	=	3.36	(J/K)	V	=	0.43	(cc)	Cp	=	1.74	(J/K)
	tephroite	fayalite	co-olivine	ni-olivine	monticellite	forsterite
	0.49	29.95	0	0	1.25	68.32
clinopyroxene	mass	=	1.65	(gm)	density	=	3.31	(gm/cc)	(analysis	in	mole	%)
	cpx	Na0.01Ca0.89Fe''0.20Mg0.72Fe'''0.05Ti0.10Al0.30Si1.74O6
	G	=	-25949.9	(J)	H	=	-21072.4	(J)	S	=	3.66	(J/K)	V	=	0.5	(cc)	Cp	=	1.91	(J/K)
	diopside	clinoenstatit	hedenbergite	alumino-buffo	buffonite	essenite	jadeite
	42.38	9.83	20.02	21.39	-2.15	7.22	1.31
spinel	mass	=	2.75	(gm)	density	=	4.46	(gm/cc)	(analysis	in	mole	%)
	Fe''1.29Mg0.44Fe'''0.37Al0.17Cr0.00Ti0.73O4
	G	=	-26550.9	(J)	H	=	-18769.5	(J)	S	=	5.84	(J/K)	V	=	0.62	(cc)	Cp	=	2.65	(J/K)
	chromite	hercynite	magnetite	spinel	ulvospinel
	0	-35.69	18.28	44.14	73.27
rhm-oxide	mass	=	0.47	(gm)	density	=	4.39	(gm/cc)	(analysis	in	mole	%)
	Mn0.01Fe''0.58Mg0.29Fe'''0.09Al0.14Ti0.88O3
	G	=	-5410.41	(J)	H	=	-4101.43	(J)	S	=	0.98	(J/K)	V	=	0.11	(cc)	Cp	=	0.47	(J/K)
	geikielite	hematite	ilmenite	pyrophanite	corundum
	28.74	4.74	58.26	1.06	7.2
Viscosity	of	the	System:	2.39	(log	10	poise)
System	mass	=	98.41	(gm)	density	=	2.57	(gm/cc)
	G	=	-1.51637e+06	(J)	H	=	-1.16141e+06	(J)	S	=	266.26	(J/K)	V	=	38.27	(cc)	Cp	=	138.61	(J/K)
Oxygen	delta	moles	=	0.00167612	delta	grams	=	0.0536339
	G	=	-509.16	(J)	H	=	57.87	(J)	S	=	0.43	(J/K)	V	=	185.79	(cc)	Cp	=	0.06	(J/K)
**********----------**********
Title:	Dummy	Title
T	=	1050	(C)	P	=	1	(kbars)	log(10)	f	O2	=	-11.1	delta	HM	=	-6.56	NNO	=	-1.62	QFM	=	-1	COH	=	1.01	IW	=	2.71
Constraint	Flags:	fO2	path	=	QFM-1	Fractionate	Solids
Liquid	mass	=	82.4	(gm)	density	=	2.45	(gm/cc)	viscosity	=	2.34	(log	10	poise)	(analysis	in	wt	%)
	G	=	-1.29685e+06	(J)	H	=	-993835	(J)	S	=	229.01	(J/K)	V	=	33.65	(cc)	Cp	=	119.47	(J/K)
	SiO2	TiO2	Al2O3	Fe2O3	Cr2O3	FeO	MnO	MgO	NiO	CoO	CaO	Na2O	K2O	P2O5	H2O	CO2	SO3	Cl2O-1	F2O-1
	49.32	1.74	15.77	1.43	0	10.31	0.29	3.15	0	0	8.99	3.34	1.53	0.86	3.27	0	0	0	0
clinopyroxene	mass	=	3.43	(gm)	density	=	3.32	(gm/cc)	(analysis	in	mole	%)
	cpx	Na0.01Ca0.89Fe''0.22Mg0.69Fe'''0.05Ti0.09Al0.30Si1.74O6
	G	=	-53506.1	(J)	H	=	-43504.1	(J)	S	=	7.56	(J/K)	V	=	1.03	(cc)	Cp	=	3.94	(J/K)
	diopside	clinoenstatit	hedenbergite	alumino-buffo	buffonite	essenite	jadeite
	40.29	10.12	22.28	20.67	-2.83	8.1	1.37
spinel	mass	=	0.86	(gm)	density	=	4.53	(gm/cc)	(analysis	in	mole	%)
	Fe''1.35Mg0.34Fe'''0.44Al0.18Cr0.00Ti0.69O4
	G	=	-7943.48	(J)	H	=	-5565.43	(J)	S	=	1.8	(J/K)	V	=	0.19	(cc)	Cp	=	0.81	(J/K)
	chromite	hercynite	magnetite	spinel	ulvospinel
	0	-25.47	21.83	34.42	69.22
water	mass	=	0.01	(gm)	density	=	0.17	(gm/cc)
	H2O
	G	=	-126.77	(J)	H	=	-58.11	(J)	S	=	0.05	(J/K)	V	=	0.03	(cc)	Cp	=	0.02	(J/K)
Total	solids	mass	=	4.29	(gm)	density	=	3.42	(gm/cc)
	G	=	-61576.3	(J)	H	=	-49127.7	(J)	S	=	9.41	(J/K)	V	=	1.25	(cc)	Cp	=	4.77	(J/K)
Summary	of	all	fractionated	phases:	(total	mass	=	11.73	grams)
olivine	mass	=	1.49	(gm)	density	=	3.46	(gm/cc)	(analysis	in	mole	%)
	(Ca0.01Mg0.70Fe''0.30Mn0.00Co0.00Ni0.00)2SiO4
	G	=	-20988.9	(J)	H	=	-16558.3	(J)	S	=	3.35	(J/K)	V	=	0.43	(cc)	Cp	=	1.74	(J/K)
	tephroite	fayalite	co-olivine	ni-olivine	monticellite	forsterite
	0.49	29.95	0	0	1.25	68.32
clinopyroxene	mass	=	5.88	(gm)	density	=	3.31	(gm/cc)	(analysis	in	mole	%)
	cpx	Na0.01Ca0.89Fe''0.21Mg0.71Fe'''0.05Ti0.09Al0.30Si1.74O6
	G	=	-91985.9	(J)	H	=	-74841.5	(J)	S	=	12.96	(J/K)	V	=	1.78	(cc)	Cp	=	6.77	(J/K)
	diopside	clinoenstatit	hedenbergite	alumino-buffo	buffonite	essenite	jadeite
	41.62	9.93	20.82	21.16	-2.38	7.53	1.33
spinel	mass	=	3.88	(gm)	density	=	4.48	(gm/cc)	(analysis	in	mole	%)
	Fe''1.30Mg0.42Fe'''0.38Al0.17Cr0.00Ti0.73O4
	G	=	-37121.1	(J)	H	=	-26276	(J)	S	=	8.2	(J/K)	V	=	0.87	(cc)	Cp	=	3.73	(J/K)
	chromite	hercynite	magnetite	spinel	ulvospinel
	0	-33.78	18.89	42.31	72.58
rhm-oxide	mass	=	0.47	(gm)	density	=	4.39	(gm/cc)	(analysis	in	mole	%)
	Mn0.01Fe''0.58Mg0.29Fe'''0.09Al0.14Ti0.88O3
	G	=	-5400.61	(J)	H	=	-4106.09	(J)	S	=	0.98	(J/K)	V	=	0.11	(cc)	Cp	=	0.47	(J/K)
	geikielite	hematite	ilmenite	pyrophanite	corundum
	28.74	4.74	58.26	1.06	7.2
Viscosity	of	the	System:	2.57	(log	10	poise)
System	mass	=	98.42	(gm)	density	=	2.58	(gm/cc)
	G	=	-1.51392e+06	(J)	H	=	-1.16474e+06	(J)	S	=	263.9	(J/K)	V	=	38.08	(cc)	Cp	=	136.94	(J/K)
Oxygen	delta	moles	=	0.00202399	delta	grams	=	0.0647653
	G	=	-609.71	(J)	H	=	69.15	(J)	S	=	0.51	(J/K)	V	=	222.66	(cc)	Cp	=	0.07	(J/K)
**********----------**********
Title:	Dummy	Title
T	=	1040	(C)	P	=	1	(kbars)	log(10)	f	O2	=	-11.24	delta	HM	=	-6.56	NNO	=	-1.61	QFM	=	-1	COH	=	1	IW	=	2.72
Constraint	Flags:	fO2	path	=	QFM-1	Fractionate	Solids
Liquid	mass	=	78.65	(gm)	density	=	2.43	(gm/cc)	viscosity	=	2.45	(log	10	poise)	(analysis	in	wt	%)
	G	=	-1.2402e+06	(J)	H	=	-953392	(J)	S	=	218.41	(J/K)	V	=	32.32	(cc)	Cp	=	113.79	(J/K)
	SiO2	TiO2	Al2O3	Fe2O3	Cr2O3	FeO	MnO	MgO	NiO	CoO	CaO	Na2O	K2O	P2O5	H2O	CO2	SO3	Cl2O-1	F2O-1
	49.88	1.49	16.21	1.4	0	10.01	0.31	2.78	0	0	8.57	3.49	1.6	0.9	3.36	0	0	0	0
clinopyroxene	mass	=	3.04	(gm)	density	=	3.32	(gm/cc)	(analysis	in	mole	%)
	cpx	Na0.01Ca0.88Fe''0.24Mg0.68Fe'''0.05Ti0.08Al0.30Si1.74O6
	G	=	-47251.2	(J)	H	=	-38483.9	(J)	S	=	6.68	(J/K)	V	=	0.92	(cc)	Cp	=	3.49	(J/K)
	diopside	clinoenstatit	hedenbergite	alumino-buffo	buffonite	essenite	jadeite
	39.02	10.33	23.61	20.23	-3.25	8.64	1.42
spinel	mass	=	0.67	(gm)	density	=	4.56	(gm/cc)	(analysis	in	mole	%)
	Fe''1.36Mg0.31Fe'''0.47Al0.19Cr0.00Ti0.67O4
	G	=	-6144.21	(J)	H	=	-4300.95	(J)	S	=	1.4	(J/K)	V	=	0.15	(cc)	Cp	=	0.63	(J/K)
	chromite	hercynite	magnetite	spinel	ulvospinel
	0	-21.8	23.49	31.07	67.24
water	mass	=	0.05	(gm)	density	=	0.17	(gm/cc)
	H2O
	G	=	-1333.97	(J)	H	=	-615.69	(J)	S	=	0.55	(J/K)	V	=	0.32	(cc)	Cp	=	0.16	(J/K)
Total	solids	mass	=	3.77	(gm)	density	=	2.73	(gm/cc)
	G	=	-54729.4	(J)	H	=	-43400.5	(J)	S	=	8.63	(J/K)	V	=	1.38	(cc)	Cp	=	4.29	(J/K)
Summary	of	all	fractionated	phases:	(total	mass	=	16.01	grams)
olivine	mass	=	1.49	(gm)	density	=	3.46	(gm/cc)	(analysis	in	mole	%)
	(Ca0.01Mg0.70Fe''0.30Mn0.00Co0.00Ni0.00)2SiO4
	G	=	-20955.5	(J)	H	=	-16575.7	(J)	S	=	3.34	(J/K)	V	=	0.43	(cc)	Cp	=	1.74	(J/K)
	tephroite	fayalite	co-olivine	ni-olivine	monticellite	forsterite
	0.49	29.95	0	0	1.25	68.32
clinopyroxene	mass	=	9.31	(gm)	density	=	3.32	(gm/cc)	(analysis	in	mole	%)
	cpx	Na0.01Ca0.89Fe''0.21Mg0.70Fe'''0.05Ti0.09Al0.30Si1.74O6
	G	=	-145252	(J)	H	=	-118424	(J)	S	=	20.43	(J/K)	V	=	2.81	(cc)	Cp	=	10.7	(J/K)
	diopside	clinoenstatit	hedenbergite	alumino-buffo	buffonite	essenite	jadeite
	41.13	10	21.36	20.98	-2.55	7.74	1.34
spinel	mass	=	4.74	(gm)	density	=	4.49	(gm/cc)	(analysis	in	mole	%)
	Fe''1.31Mg0.41Fe'''0.39Al0.17Cr0.00Ti0.72O4
	G	=	-44945.7	(J)	H	=	-31872.9	(J)	S	=	9.96	(J/K)	V	=	1.06	(cc)	Cp	=	4.53	(J/K)
	chromite	hercynite	magnetite	spinel	ulvospinel
	0	-32.3	19.42	40.9	71.98
rhm-oxide	mass	=	0.47	(gm)	density	=	4.39	(gm/cc)	(analysis	in	mole	%)
	Mn0.01Fe''0.58Mg0.29Fe'''0.09Al0.14Ti0.88O3
	G	=	-5390.85	(J)	H	=	-4110.76	(J)	S	=	0.97	(J/K)	V	=	0.11	(cc)	Cp	=	0.47	(J/K)
	geikielite	hematite	ilmenite	pyrophanite	corundum
	28.74	4.74	58.26	1.06	7.2
Viscosity	of	the	System:	2.77	(log	10	poise)
System	mass	=	98.43	(gm)	density	=	2.58	(gm/cc)
	G	=	-1.51147e+06	(J)	H	=	-1.16778e+06	(J)	S	=	261.73	(J/K)	V	=	38.11	(cc)	Cp	=	135.51	(J/K)
Oxygen	delta	moles	=	0.00232713	delta	grams	=	0.0744653
	G	=	-695.13	(J)	H	=	78.66	(J)	S	=	0.59	(J/K)	V	=	254.07	(cc)	Cp	=	0.08	(J/K)
**********----------**********
Title:	Dummy	Title
T	=	1030	(C)	P	=	1	(kbars)	log(10)	f	O2	=	-11.38	delta	HM	=	-6.56	NNO	=	-1.61	QFM	=	-1	COH	=	0.99	IW	=	2.74
Constraint	Flags:	fO2	path	=	QFM-1	Fractionate	Solids
Liquid	mass	=	75.55	(gm)	density	=	2.42	(gm/cc)	viscosity	=	2.56	(log	10	poise)	(analysis	in	wt	%)
	G	=	-1.19319e+06	(J)	H	=	-920130	(J)	S	=	209.54	(J/K)	V	=	31.22	(cc)	Cp	=	109.1	(J/K)
	SiO2	TiO2	Al2O3	Fe2O3	Cr2O3	FeO	MnO	MgO	NiO	CoO	CaO	Na2O	K2O	P2O5	H2O	CO2	SO3	Cl2O-1	F2O-1
	50.37	1.28	16.62	1.37	0	9.72	0.32	2.46	0	0	8.19	3.63	1.67	0.94	3.45	0	0	0	0
clinopyroxene	mass	=	2.53	(gm)	density	=	3.33	(gm/cc)	(analysis	in	mole	%)
	cpx	Na0.01Ca0.88Fe''0.25Mg0.67Fe'''0.06Ti0.08Al0.30Si1.75O6
	G	=	-39127.7	(J)	H	=	-31921.6	(J)	S	=	5.53	(J/K)	V	=	0.76	(cc)	Cp	=	2.9	(J/K)
	diopside	clinoenstatit	hedenbergite	alumino-buffo	buffonite	essenite	jadeite
	37.75	10.54	24.98	19.74	-3.69	9.2	1.48
spinel	mass	=	0.54	(gm)	density	=	4.59	(gm/cc)	(analysis	in	mole	%)
	Fe''1.37Mg0.28Fe'''0.51Al0.19Cr0.00Ti0.65O4
	G	=	-4902.23	(J)	H	=	-3429.42	(J)	S	=	1.13	(J/K)	V	=	0.12	(cc)	Cp	=	0.51	(J/K)
	chromite	hercynite	magnetite	spinel	ulvospinel
	0	-18.43	25.29	28.05	65.09
water	mass	=	0.09	(gm)	density	=	0.17	(gm/cc)
	H2O
	G	=	-2335.05	(J)	H	=	-1085.06	(J)	S	=	0.96	(J/K)	V	=	0.55	(cc)	Cp	=	0.29	(J/K)
Total	solids	mass	=	3.17	(gm)	density	=	2.21	(gm/cc)
	G	=	-46364.9	(J)	H	=	-36436.1	(J)	S	=	7.62	(J/K)	V	=	1.43	(cc)	Cp	=	3.7	(J/K)
Summary	of	all	fractionated	phases:	(total	mass	=	19.73	grams)
olivine	mass	=	1.49	(gm)	density	=	3.46	(gm/cc)	(analysis	in	mole	%)
	(Ca0.01Mg0.70Fe''0.30Mn0.00Co0.00Ni0.00)2SiO4
	G	=	-20922.2	(J)	H	=	-16593	(J)	S	=	3.32	(J/K)	V	=	0.43	(cc)	Cp	=	1.73	(J/K)
	tephroite	fayalite	co-olivine	ni-olivine	monticellite	forsterite
	0.49	29.95	0	0	1.25	68.32
clinopyroxene	mass	=	12.36	(gm)	density	=	3.32	(gm/cc)	(analysis	in	mole	%)
	cpx	Na0.01Ca0.89Fe''0.22Mg0.70Fe'''0.05Ti0.09Al0.30Si1.74O6
	G	=	-192198	(J)	H	=	-157021	(J)	S	=	26.99	(J/K)	V	=	3.72	(cc)	Cp	=	14.17	(J/K)
	diopside	clinoenstatit	hedenbergite	alumino-buffo	buffonite	essenite	jadeite
	40.61	10.08	21.91	20.79	-2.72	7.96	1.36
spinel	mass	=	5.41	(gm)	density	=	4.5	(gm/cc)	(analysis	in	mole	%)
	Fe''1.32Mg0.40Fe'''0.40Al0.17Cr0.00Ti0.71O4
	G	=	-50957.6	(J)	H	=	-36211.5	(J)	S	=	11.32	(J/K)	V	=	1.2	(cc)	Cp	=	5.16	(J/K)
	chromite	hercynite	magnetite	spinel	ulvospinel
	0	-31.02	19.91	39.7	71.4
rhm-oxide	mass	=	0.47	(gm)	density	=	4.39	(gm/cc)	(analysis	in	mole	%)
	Mn0.01Fe''0.58Mg0.29Fe'''0.09Al0.14Ti0.88O3
	G	=	-5381.12	(J)	H	=	-4115.42	(J)	S	=	0.97	(J/K)	V	=	0.11	(cc)	Cp	=	0.47	(J/K)
	geikielite	hematite	ilmenite	pyrophanite	corundum
	28.74	4.74	58.26	1.06	7.2
Viscosity	of	the	System:	2.95	(log	10	poise)
System	mass	=	98.44	(gm)	density	=	2.58	(gm/cc)
	G	=	-1.50902e+06	(J)	H	=	-1.17051e+06	(J)	S	=	259.76	(J/K)	V	=	38.11	(cc)	Cp	=	134.32	(J/K)
Oxygen	delta	moles	=	0.00259566	delta	grams	=	0.0830581
	G	=	-768.77	(J)	H	=	86.81	(J)	S	=	0.66	(J/K)	V	=	281.23	(cc)	Cp	=	0.09	(J/K)
**********----------**********
Title:	Dummy	Title
T	=	1020	(C)	P	=	1	(kbars)	log(10)	f	O2	=	-11.53	delta	HM	=	-6.56	NNO	=	-1.61	QFM	=	-1	COH	=	0.97	IW	=	2.75
Constraint	Flags:	fO2	path	=	QFM-1	Fractionate	Solids
Liquid	mass	=	72.76	(gm)	density	=	2.41	(gm/cc)	viscosity	=	2.68	(log	10	poise)	(analysis	in	wt	%)
	G	=	-1.15087e+06	(J)	H	=	-890247	(J)	S	=	201.54	(J/K)	V	=	30.21	(cc)	Cp	=	104.84	(J/K)
	SiO2	TiO2	Al2O3	Fe2O3	Cr2O3	FeO	MnO	MgO	NiO	CoO	CaO	Na2O	K2O	P2O5	H2O	CO2	SO3	Cl2O-1	F2O-1
	50.9	1.1	17.02	1.33	0	9.45	0.33	2.17	0	0	7.77	3.76	1.73	0.91	3.53	0	0	0	0
clinopyroxene	mass	=	2.19	(gm)	density	=	3.33	(gm/cc)	(analysis	in	mole	%)
	cpx	Na0.02Ca0.88Fe''0.26Mg0.66Fe'''0.06Ti0.07Al0.30Si1.75O6
	G	=	-33716.3	(J)	H	=	-27552.8	(J)	S	=	4.77	(J/K)	V	=	0.66	(cc)	Cp	=	2.5	(J/K)
	diopside	clinoenstatit	hedenbergite	alumino-buffo	buffonite	essenite	jadeite
	36.44	10.81	26.42	19.15	-4.16	9.79	1.55
spinel	mass	=	0.46	(gm)	density	=	4.61	(gm/cc)	(analysis	in	mole	%)
	Fe''1.37Mg0.25Fe'''0.55Al0.20Cr0.00Ti0.63O4
	G	=	-4128.49	(J)	H	=	-2887.02	(J)	S	=	0.96	(J/K)	V	=	0.1	(cc)	Cp	=	0.43	(J/K)
	chromite	hercynite	magnetite	spinel	ulvospinel
	0	-15.3	27.26	25.31	62.74
apatite	mass	=	0.11	(gm)	density	=	3.06	(gm/cc)
	Ca5(PO4)3OH
	G	=	-1663.89	(J)	H	=	-1345.58	(J)	S	=	0.25	(J/K)	V	=	0.04	(cc)	Cp	=	0.13	(J/K)
water	mass	=	0.13	(gm)	density	=	0.17	(gm/cc)
	H2O
	G	=	-3246.85	(J)	H	=	-1519.04	(J)	S	=	1.34	(J/K)	V	=	0.77	(cc)	Cp	=	0.41	(J/K)
Total	solids	mass	=	2.9	(gm)	density	=	1.86	(gm/cc)
	G	=	-42755.5	(J)	H	=	-33304.5	(J)	S	=	7.31	(J/K)	V	=	1.56	(cc)	Cp	=	3.47	(J/K)
Summary	of	all	fractionated	phases:	(total	mass	=	22.8	grams)
olivine	mass	=	1.49	(gm)	density	=	3.46	(gm/cc)	(analysis	in	mole	%)
	(Ca0.01Mg0.70Fe''0.30Mn0.00Co0.00Ni0.00)2SiO4
	G	=	-20889	(J)	H	=	-16610.3	(J)	S	=	3.31	(J/K)	V	=	0.43	(cc)	Cp	=	1.73	(J/K)
	tephroite	fayalite	co-olivine	ni-olivine	monticellite	forsterite
	0.49	29.95	0	0	1.25	68.32
clinopyroxene	mass	=	14.89	(gm)	density	=	3.32	(gm/cc)	(analysis	in	mole	%)
	cpx	Na0.01Ca0.88Fe''0.22Mg0.69Fe'''0.05Ti0.09Al0.30Si1.74O6
	G	=	-230967	(J)	H	=	-189085	(J)	S	=	32.39	(J/K)	V	=	4.48	(cc)	Cp	=	17.05	(J/K)
	diopside	clinoenstatit	hedenbergite	alumino-buffo	buffonite	essenite	jadeite
	40.13	10.16	22.43	20.62	-2.89	8.17	1.38
spinel	mass	=	5.95	(gm)	density	=	4.51	(gm/cc)	(analysis	in	mole	%)
	Fe''1.32Mg0.39Fe'''0.41Al0.18Cr0.00Ti0.71O4
	G	=	-55717.1	(J)	H	=	-39683.6	(J)	S	=	12.4	(J/K)	V	=	1.32	(cc)	Cp	=	5.66	(J/K)
	chromite	hercynite	magnetite	spinel	ulvospinel
	0	-29.89	20.4	38.66	70.84
rhm-oxide	mass	=	0.47	(gm)	density	=	4.39	(gm/cc)	(analysis	in	mole	%)
	Mn0.01Fe''0.58Mg0.29Fe'''0.09Al0.14Ti0.88O3
	G	=	-5371.42	(J)	H	=	-4120.08	(J)	S	=	0.97	(J/K)	V	=	0.11	(cc)	Cp	=	0.47	(J/K)
	geikielite	hematite	ilmenite	pyrophanite	corundum
	28.74	4.74	58.26	1.06	7.2
Viscosity	of	the	System:	3.14	(log	10	poise)
System	mass	=	98.45	(gm)	density	=	2.58	(gm/cc)
	G	=	-1.50657e+06	(J)	H	=	-1.17305e+06	(J)	S	=	257.91	(J/K)	V	=	38.11	(cc)	Cp	=	133.22	(J/K)
Oxygen	delta	moles	=	0.00283788	delta	grams	=	0.0908088
	G	=	-833.33	(J)	H	=	93.89	(J)	S	=	0.72	(J/K)	V	=	305.12	(cc)	Cp	=	0.1	(J/K)
**********----------**********
Title:	Dummy	Title
T	=	1010	(C)	P	=	1	(kbars)	log(10)	f	O2	=	-11.67	delta	HM	=	-6.57	NNO	=	-1.6	QFM	=	-1	COH	=	0.96	IW	=	2.77
Constraint	Flags:	fO2	path	=	QFM-1	Fractionate	Solids
Liquid	mass	=	70.32	(gm)	density	=	2.4	(gm/cc)	viscosity	=	2.8	(log	10	poise)	(analysis	in	wt	%)
	G	=	-1.11385e+06	(J)	H	=	-864275	(J)	S	=	194.5	(J/K)	V	=	29.34	(cc)	Cp	=	101.12	(J/K)
	SiO2	TiO2	Al2O3	Fe2O3	Cr2O3	FeO	MnO	MgO	NiO	CoO	CaO	Na2O	K2O	P2O5	H2O	CO2	SO3	Cl2O-1	F2O-1
	51.42	0.95	17.4	1.3	0	9.19	0.34	1.91	0	0	7.35	3.89	1.79	0.86	3.6	0	0	0	0
clinopyroxene	mass	=	1.89	(gm)	density	=	3.34	(gm/cc)	(analysis	in	mole	%)
	cpx	Na0.02Ca0.87Fe''0.28Mg0.64Fe'''0.06Ti0.07Al0.31Si1.76O6
	G	=	-28923.1	(J)	H	=	-23674.9	(J)	S	=	4.09	(J/K)	V	=	0.57	(cc)	Cp	=	2.15	(J/K)
	diopside	clinoenstatit	hedenbergite	alumino-buffo	buffonite	essenite	jadeite
	35.03	11.09	27.92	18.58	-4.64	10.4	1.62
spinel	mass	=	0.4	(gm)	density	=	4.63	(gm/cc)	(analysis	in	mole	%)
	Fe''1.37Mg0.23Fe'''0.59Al0.21Cr0.00Ti0.60O4
	G	=	-3487.08	(J)	H	=	-2438	(J)	S	=	0.82	(J/K)	V	=	0.09	(cc)	Cp	=	0.37	(J/K)
	chromite	hercynite	magnetite	spinel	ulvospinel
	0	-12.38	29.39	22.81	60.18
apatite	mass	=	0.14	(gm)	density	=	3.06	(gm/cc)
	Ca5(PO4)3OH
	G	=	-2057.65	(J)	H	=	-1668.04	(J)	S	=	0.3	(J/K)	V	=	0.04	(cc)	Cp	=	0.16	(J/K)
water	mass	=	0.16	(gm)	density	=	0.17	(gm/cc)
	H2O
	G	=	-4042.8	(J)	H	=	-1904.32	(J)	S	=	1.67	(J/K)	V	=	0.95	(cc)	Cp	=	0.51	(J/K)
Total	solids	mass	=	2.59	(gm)	density	=	1.57	(gm/cc)
	G	=	-38510.6	(J)	H	=	-29685.3	(J)	S	=	6.88	(J/K)	V	=	1.64	(cc)	Cp	=	3.19	(J/K)
Summary	of	all	fractionated	phases:	(total	mass	=	25.55	grams)
olivine	mass	=	1.49	(gm)	density	=	3.46	(gm/cc)	(analysis	in	mole	%)
	(Ca0.01Mg0.70Fe''0.30Mn0.00Co0.00Ni0.00)2SiO4
	G	=	-20856	(J)	H	=	-16627.6	(J)	S	=	3.3	(J/K)	V	=	0.43	(cc)	Cp	=	1.73	(J/K)
	tephroite	fayalite	co-olivine	ni-olivine	monticellite	forsterite
	0.49	29.95	0	0	1.25	68.32
clinopyroxene	mass	=	17.08	(gm)	density	=	3.32	(gm/cc)	(analysis	in	mole	%)
	cpx	Na0.01Ca0.88Fe''0.23Mg0.69Fe'''0.05Ti0.09Al0.30Si1.74O6
	G	=	-264278	(J)	H	=	-216804	(J)	S	=	37	(J/K)	V	=	5.14	(cc)	Cp	=	19.53	(J/K)
	diopside	clinoenstatit	hedenbergite	alumino-buffo	buffonite	essenite	jadeite
	39.66	10.24	22.94	20.43	-3.05	8.38	1.4
spinel	mass	=	6.41	(gm)	density	=	4.51	(gm/cc)	(analysis	in	mole	%)
	Fe''1.33Mg0.38Fe'''0.42Al0.18Cr0.00Ti0.70O4
	G	=	-59694	(J)	H	=	-42617.6	(J)	S	=	13.31	(J/K)	V	=	1.42	(cc)	Cp	=	6.08	(J/K)
	chromite	hercynite	magnetite	spinel	ulvospinel
	0	-28.86	20.88	37.71	70.26
rhm-oxide	mass	=	0.47	(gm)	density	=	4.39	(gm/cc)	(analysis	in	mole	%)
	Mn0.01Fe''0.58Mg0.29Fe'''0.09Al0.14Ti0.88O3
	G	=	-5361.76	(J)	H	=	-4124.74	(J)	S	=	0.96	(J/K)	V	=	0.11	(cc)	Cp	=	0.47	(J/K)
	geikielite	hematite	ilmenite	pyrophanite	corundum
	28.74	4.74	58.26	1.06	7.2
apatite	mass	=	0.1	(gm)	density	=	3.06	(gm/cc)
	Ca5(PO4)3OH
	G	=	-1585.34	(J)	H	=	-1285.15	(J)	S	=	0.23	(J/K)	V	=	0.03	(cc)	Cp	=	0.12	(J/K)
Viscosity	of	the	System:	3.33	(log	10	poise)
System	mass	=	98.46	(gm)	density	=	2.58	(gm/cc)
	G	=	-1.50413e+06	(J)	H	=	-1.17542e+06	(J)	S	=	256.18	(J/K)	V	=	38.11	(cc)	Cp	=	132.23	(J/K)
Oxygen	delta	moles	=	0.00306211	delta	grams	=	0.0979839
	G	=	-891.45	(J)	H	=	100.2	(J)	S	=	0.77	(J/K)	V	=	326.68	(cc)	Cp	=	0.11	(J/K)
**********----------**********
Title:	Dummy	Title
T	=	1000	(C)	P	=	1	(kbars)	log(10)	f	O2	=	-11.82	delta	HM	=	-6.57	NNO	=	-1.6	QFM	=	-1	COH	=	0.95	IW	=	2.78
Constraint	Flags:	fO2	path	=	QFM-1	Fractionate	Solids
Liquid	mass	=	66.97	(gm)	density	=	2.39	(gm/cc)	viscosity	=	2.91	(log	10	poise)	(analysis	in	wt	%)
	G	=	-1.06145e+06	(J)	H	=	-826007	(J)	S	=	184.93	(J/K)	V	=	28.06	(cc)	Cp	=	96.06	(J/K)
	SiO2	TiO2	Al2O3	Fe2O3	Cr2O3	FeO	MnO	MgO	NiO	CoO	CaO	Na2O	K2O	P2O5	H2O	CO2	SO3	Cl2O-1	F2O-1
	52.08	0.8	17.48	1.29	0	8.99	0.36	1.73	0	0	6.87	4.03	1.88	0.83	3.66	0	0	0	0
clinopyroxene	mass	=	1.45	(gm)	density	=	3.34	(gm/cc)	(analysis	in	mole	%)
	cpx	Na0.02Ca0.86Fe''0.30Mg0.64Fe'''0.06Ti0.06Al0.29Si1.78O6
	G	=	-22107.5	(J)	H	=	-18123	(J)	S	=	3.13	(J/K)	V	=	0.43	(cc)	Cp	=	1.65	(J/K)
	diopside	clinoenstatit	hedenbergite	alumino-buffo	buffonite	essenite	jadeite
	34.06	12.45	29.97	16.23	-5.19	10.8	1.69
feldspar	mass	=	1.22	(gm)	density	=	2.68	(gm/cc)	(analysis	in	mole	%)
	K0.01Na0.21Ca0.78Al1.78Si2.22O8
	G	=	-20681.3	(J)	H	=	-17148.5	(J)	S	=	2.77	(J/K)	V	=	0.46	(cc)	Cp	=	1.48	(J/K)
	albite	anorthite	sanidine
	21.06	78.37	0.57
spinel	mass	=	0.49	(gm)	density	=	4.65	(gm/cc)	(analysis	in	mole	%)
	Fe''1.37Mg0.21Fe'''0.64Al0.21Cr0.00Ti0.57O4
	G	=	-4198.09	(J)	H	=	-2934.04	(J)	S	=	0.99	(J/K)	V	=	0.1	(cc)	Cp	=	0.45	(J/K)
	chromite	hercynite	magnetite	spinel	ulvospinel
	0	-9.99	31.94	20.71	57.34
apatite	mass	=	0.13	(gm)	density	=	3.06	(gm/cc)
	Ca5(PO4)3OH
	G	=	-1891.99	(J)	H	=	-1537.44	(J)	S	=	0.28	(J/K)	V	=	0.04	(cc)	Cp	=	0.14	(J/K)
water	mass	=	0.24	(gm)	density	=	0.18	(gm/cc)
	H2O
	G	=	-5890.03	(J)	H	=	-2793.4	(J)	S	=	2.43	(J/K)	V	=	1.37	(cc)	Cp	=	0.75	(J/K)
Total	solids	mass	=	3.52	(gm)	density	=	1.46	(gm/cc)
	G	=	-54768.9	(J)	H	=	-42536.4	(J)	S	=	9.61	(J/K)	V	=	2.41	(cc)	Cp	=	4.47	(J/K)
Summary	of	all	fractionated	phases:	(total	mass	=	27.97	grams)
olivine	mass	=	1.49	(gm)	density	=	3.46	(gm/cc)	(analysis	in	mole	%)
	(Ca0.01Mg0.70Fe''0.30Mn0.00Co0.00Ni0.00)2SiO4
	G	=	-20823.1	(J)	H	=	-16644.9	(J)	S	=	3.28	(J/K)	V	=	0.43	(cc)	Cp	=	1.73	(J/K)
	tephroite	fayalite	co-olivine	ni-olivine	monticellite	forsterite
	0.49	29.95	0	0	1.25	68.32
clinopyroxene	mass	=	18.96	(gm)	density	=	3.33	(gm/cc)	(analysis	in	mole	%)
	cpx	Na0.01Ca0.88Fe''0.23Mg0.68Fe'''0.05Ti0.09Al0.30Si1.74O6
	G	=	-292757	(J)	H	=	-240667	(J)	S	=	40.91	(J/K)	V	=	5.7	(cc)	Cp	=	21.66	(J/K)
	diopside	clinoenstatit	hedenbergite	alumino-buffo	buffonite	essenite	jadeite
	39.2	10.33	23.43	20.25	-3.21	8.58	1.43
spinel	mass	=	6.81	(gm)	density	=	4.52	(gm/cc)	(analysis	in	mole	%)
	Fe''1.33Mg0.37Fe'''0.43Al0.18Cr0.00Ti0.70O4
	G	=	-63022.2	(J)	H	=	-45106.1	(J)	S	=	14.07	(J/K)	V	=	1.51	(cc)	Cp	=	6.44	(J/K)
	chromite	hercynite	magnetite	spinel	ulvospinel
	0	-27.92	21.37	36.86	69.69
rhm-oxide	mass	=	0.47	(gm)	density	=	4.39	(gm/cc)	(analysis	in	mole	%)
	Mn0.01Fe''0.58Mg0.29Fe'''0.09Al0.14Ti0.88O3
	G	=	-5352.14	(J)	H	=	-4129.4	(J)	S	=	0.96	(J/K)	V	=	0.11	(cc)	Cp	=	0.47	(J/K)
	geikielite	hematite	ilmenite	pyrophanite	corundum
	28.74	4.74	58.26	1.06	7.2
apatite	mass	=	0.24	(gm)	density	=	3.06	(gm/cc)
	Ca5(PO4)3OH
	G	=	-3561.64	(J)	H	=	-2894.21	(J)	S	=	0.52	(J/K)	V	=	0.08	(cc)	Cp	=	0.27	(J/K)
Viscosity	of	the	System:	3.58	(log	10	poise)
System	mass	=	98.47	(gm)	density	=	2.57	(gm/cc)
	G	=	-1.50174e+06	(J)	H	=	-1.17799e+06	(J)	S	=	254.29	(J/K)	V	=	38.29	(cc)	Cp	=	131.1	(J/K)
Oxygen	delta	moles	=	0.00333881	delta	grams	=	0.106838
	G	=	-963.58	(J)	H	=	108.06	(J)	S	=	0.84	(J/K)	V	=	353.42	(cc)	Cp	=	0.12	(J/K)
**********----------**********
Title:	Dummy	Title
T	=	990	(C)	P	=	1	(kbars)	log(10)	f	O2	=	-11.97	delta	HM	=	-6.57	NNO	=	-1.6	QFM	=	-1	COH	=	0.93	IW	=	2.8
Constraint	Flags:	fO2	path	=	QFM-1	Fractionate	Solids
Liquid	mass	=	61.39	(gm)	density	=	2.37	(gm/cc)	viscosity	=	3.07	(log	10	poise)	(analysis	in	wt	%)
	G	=	-974224	(J)	H	=	-760446	(J)	S	=	169.24	(J/K)	V	=	25.89	(cc)	Cp	=	87.68	(J/K)
	SiO2	TiO2	Al2O3	Fe2O3	Cr2O3	FeO	MnO	MgO	NiO	CoO	CaO	Na2O	K2O	P2O5	H2O	CO2	SO3	Cl2O-1	F2O-1
	53.28	0.7	17.11	1.26	0	8.56	0.37	1.47	0	0	6.44	4.24	2.04	0.8	3.72	0	0	0	0
olivine	mass	=	1.15	(gm)	density	=	3.73	(gm/cc)	(analysis	in	mole	%)
	(Ca0.01Mg0.46Fe''0.52Mn0.01Co0.00Ni0.00)2SiO4
	G	=	-13802.3	(J)	H	=	-10722	(J)	S	=	2.44	(J/K)	V	=	0.31	(cc)	Cp	=	1.24	(J/K)
	tephroite	fayalite	co-olivine	ni-olivine	monticellite	forsterite
	1.32	52.21	0	0	1.23	45.24
feldspar	mass	=	3.62	(gm)	density	=	2.68	(gm/cc)	(analysis	in	mole	%)
	K0.01Na0.24Ca0.76Al1.76Si2.24O8
	G	=	-61058.9	(J)	H	=	-50717.1	(J)	S	=	8.19	(J/K)	V	=	1.35	(cc)	Cp	=	4.38	(J/K)
	albite	anorthite	sanidine
	23.66	75.68	0.66
spinel	mass	=	0.52	(gm)	density	=	4.68	(gm/cc)	(analysis	in	mole	%)
	Fe''1.38Mg0.18Fe'''0.68Al0.20Cr0.00Ti0.56O4
	G	=	-4379.56	(J)	H	=	-3056.95	(J)	S	=	1.05	(J/K)	V	=	0.11	(cc)	Cp	=	0.47	(J/K)
	chromite	hercynite	magnetite	spinel	ulvospinel
	0	-8.15	33.85	18.26	56.03
apatite	mass	=	0.16	(gm)	density	=	3.06	(gm/cc)
	Ca5(PO4)3OH
	G	=	-2359.35	(J)	H	=	-1921.84	(J)	S	=	0.35	(J/K)	V	=	0.05	(cc)	Cp	=	0.18	(J/K)
water	mass	=	0.41	(gm)	density	=	0.18	(gm/cc)
	H2O
	G	=	-9903.12	(J)	H	=	-4728.76	(J)	S	=	4.1	(J/K)	V	=	2.29	(cc)	Cp	=	1.27	(J/K)
Total	solids	mass	=	5.84	(gm)	density	=	1.42	(gm/cc)
	G	=	-91503.2	(J)	H	=	-71146.7	(J)	S	=	16.12	(J/K)	V	=	4.11	(cc)	Cp	=	7.54	(J/K)
Summary	of	all	fractionated	phases:	(total	mass	=	31.24	grams)
olivine	mass	=	1.49	(gm)	density	=	3.47	(gm/cc)	(analysis	in	mole	%)
	(Ca0.01Mg0.70Fe''0.30Mn0.00Co0.00Ni0.00)2SiO4
	G	=	-20790.4	(J)	H	=	-16662.2	(J)	S	=	3.27	(J/K)	V	=	0.43	(cc)	Cp	=	1.73	(J/K)
	tephroite	fayalite	co-olivine	ni-olivine	monticellite	forsterite
	0.49	29.95	0	0	1.25	68.32
clinopyroxene	mass	=	20.41	(gm)	density	=	3.33	(gm/cc)	(analysis	in	mole	%)
	cpx	Na0.01Ca0.88Fe''0.24Mg0.68Fe'''0.05Ti0.08Al0.30Si1.75O6
	G	=	-314391	(J)	H	=	-258994	(J)	S	=	43.86	(J/K)	V	=	6.13	(cc)	Cp	=	23.28	(J/K)
	diopside	clinoenstatit	hedenbergite	alumino-buffo	buffonite	essenite	jadeite
	38.84	10.48	23.89	19.96	-3.35	8.73	1.44
feldspar	mass	=	1.22	(gm)	density	=	2.68	(gm/cc)	(analysis	in	mole	%)
	K0.01Na0.21Ca0.78Al1.78Si2.22O8
	G	=	-20607.2	(J)	H	=	-17124.8	(J)	S	=	2.76	(J/K)	V	=	0.45	(cc)	Cp	=	1.48	(J/K)
	albite	anorthite	sanidine
	21.06	78.37	0.57
spinel	mass	=	7.29	(gm)	density	=	4.53	(gm/cc)	(analysis	in	mole	%)
	Fe''1.33Mg0.36Fe'''0.44Al0.18Cr0.00Ti0.69O4
	G	=	-67052.7	(J)	H	=	-48094.6	(J)	S	=	15.01	(J/K)	V	=	1.61	(cc)	Cp	=	6.88	(J/K)
	chromite	hercynite	magnetite	spinel	ulvospinel
	0	-26.76	22.05	35.82	68.89
rhm-oxide	mass	=	0.47	(gm)	density	=	4.39	(gm/cc)	(analysis	in	mole	%)
	Mn0.01Fe''0.58Mg0.29Fe'''0.09Al0.14Ti0.88O3
	G	=	-5342.55	(J)	H	=	-4134.06	(J)	S	=	0.96	(J/K)	V	=	0.11	(cc)	Cp	=	0.47	(J/K)
	geikielite	hematite	ilmenite	pyrophanite	corundum
	28.74	4.74	58.26	1.06	7.2
apatite	mass	=	0.36	(gm)	density	=	3.06	(gm/cc)
	Ca5(PO4)3OH
	G	=	-5369.74	(J)	H	=	-4373.99	(J)	S	=	0.79	(J/K)	V	=	0.12	(cc)	Cp	=	0.41	(J/K)
Viscosity	of	the	System:	4.03	(log	10	poise)
System	mass	=	98.47	(gm)	density	=	2.53	(gm/cc)
	G	=	-1.49928e+06	(J)	H	=	-1.18098e+06	(J)	S	=	251.99	(J/K)	V	=	38.85	(cc)	Cp	=	129.46	(J/K)
Oxygen	delta	moles	=	0.00346305	delta	grams	=	0.110813
	G	=	-990.71	(J)	H	=	110.84	(J)	S	=	0.87	(J/K)	V	=	363.7	(cc)	Cp	=	0.12	(J/K)
**********----------**********
Title:	Dummy	Title
T	=	980	(C)	P	=	1	(kbars)	log(10)	f	O2	=	-12.13	delta	HM	=	-6.58	NNO	=	-1.59	QFM	=	-1	COH	=	0.92	IW	=	2.82
Constraint	Flags:	fO2	path	=	QFM-1	Fractionate	Solids
Liquid	mass	=	56.64	(gm)	density	=	2.36	(gm/cc)	viscosity	=	3.23	(log	10	poise)	(analysis	in	wt	%)
	G	=	-900060	(J)	H	=	-704756	(J)	S	=	155.85	(J/K)	V	=	24.04	(cc)	Cp	=	80.58	(J/K)
	SiO2	TiO2	Al2O3	Fe2O3	Cr2O3	FeO	MnO	MgO	NiO	CoO	CaO	Na2O	K2O	P2O5	H2O	CO2	SO3	Cl2O-1	F2O-1
	54.44	0.61	16.75	1.23	0	8.13	0.38	1.24	0	0	6.03	4.43	2.21	0.78	3.77	0	0	0	0
olivine	mass	=	0.97	(gm)	density	=	3.78	(gm/cc)	(analysis	in	mole	%)
	(Ca0.01Mg0.43Fe''0.56Mn0.02Co0.00Ni0.00)2SiO4
	G	=	-11413.2	(J)	H	=	-8845.41	(J)	S	=	2.05	(J/K)	V	=	0.26	(cc)	Cp	=	1.04	(J/K)
	tephroite	fayalite	co-olivine	ni-olivine	monticellite	forsterite
	1.51	55.77	0	0	1.25	41.48
feldspar	mass	=	3.11	(gm)	density	=	2.67	(gm/cc)	(analysis	in	mole	%)
	K0.01Na0.26Ca0.73Al1.73Si2.27O8
	G	=	-52409	(J)	H	=	-43607.1	(J)	S	=	7.02	(J/K)	V	=	1.16	(cc)	Cp	=	3.76	(J/K)
	albite	anorthite	sanidine
	26.49	72.75	0.77
spinel	mass	=	0.41	(gm)	density	=	4.7	(gm/cc)	(analysis	in	mole	%)
	Fe''1.38Mg0.16Fe'''0.72Al0.19Cr0.00Ti0.55O4
	G	=	-3431.8	(J)	H	=	-2393.38	(J)	S	=	0.83	(J/K)	V	=	0.09	(cc)	Cp	=	0.38	(J/K)
	chromite	hercynite	magnetite	spinel	ulvospinel
	0	-6.53	35.8	16.14	54.59
apatite	mass	=	0.13	(gm)	density	=	3.06	(gm/cc)
	Ca5(PO4)3OH
	G	=	-1916.59	(J)	H	=	-1564.93	(J)	S	=	0.28	(J/K)	V	=	0.04	(cc)	Cp	=	0.15	(J/K)
water	mass	=	0.55	(gm)	density	=	0.18	(gm/cc)
	H2O
	G	=	-13387.8	(J)	H	=	-6436.48	(J)	S	=	5.55	(J/K)	V	=	3.07	(cc)	Cp	=	1.73	(J/K)
Total	solids	mass	=	5.17	(gm)	density	=	1.12	(gm/cc)
	G	=	-82558.3	(J)	H	=	-62847.3	(J)	S	=	15.73	(J/K)	V	=	4.62	(cc)	Cp	=	7.05	(J/K)
Summary	of	all	fractionated	phases:	(total	mass	=	36.66	grams)
olivine	mass	=	2.63	(gm)	density	=	3.58	(gm/cc)	(analysis	in	mole	%)
	(Ca0.01Mg0.60Fe''0.39Mn0.01Co0.00Ni0.00)2SiO4
	G	=	-34519.6	(J)	H	=	-27393.3	(J)	S	=	5.69	(J/K)	V	=	0.73	(cc)	Cp	=	2.96	(J/K)
	tephroite	fayalite	co-olivine	ni-olivine	monticellite	forsterite
	0.83	39.16	0	0	1.24	58.77
clinopyroxene	mass	=	20.41	(gm)	density	=	3.33	(gm/cc)	(analysis	in	mole	%)
	cpx	Na0.01Ca0.88Fe''0.24Mg0.68Fe'''0.05Ti0.08Al0.30Si1.75O6
	G	=	-313953	(J)	H	=	-259227	(J)	S	=	43.67	(J/K)	V	=	6.13	(cc)	Cp	=	23.26	(J/K)
	diopside	clinoenstatit	hedenbergite	alumino-buffo	buffonite	essenite	jadeite
	38.84	10.48	23.89	19.96	-3.35	8.73	1.44
feldspar	mass	=	4.84	(gm)	density	=	2.68	(gm/cc)	(analysis	in	mole	%)
	K0.01Na0.23Ca0.76Al1.76Si2.24O8
	G	=	-81510.7	(J)	H	=	-67861.8	(J)	S	=	10.89	(J/K)	V	=	1.8	(cc)	Cp	=	5.84	(J/K)
	albite	anorthite	sanidine
	23.01	76.36	0.64
spinel	mass	=	7.8	(gm)	density	=	4.54	(gm/cc)	(analysis	in	mole	%)
	Fe''1.33Mg0.35Fe'''0.46Al0.18Cr0.00Ti0.68O4
	G	=	-71255.3	(J)	H	=	-51210.4	(J)	S	=	16	(J/K)	V	=	1.72	(cc)	Cp	=	7.34	(J/K)
	chromite	hercynite	magnetite	spinel	ulvospinel
	0	-25.56	22.81	34.69	68.06
rhm-oxide	mass	=	0.47	(gm)	density	=	4.4	(gm/cc)	(analysis	in	mole	%)
	Mn0.01Fe''0.58Mg0.29Fe'''0.09Al0.14Ti0.88O3
	G	=	-5333.01	(J)	H	=	-4138.71	(J)	S	=	0.95	(J/K)	V	=	0.11	(cc)	Cp	=	0.47	(J/K)
	geikielite	hematite	ilmenite	pyrophanite	corundum
	28.74	4.74	58.26	1.06	7.2
apatite	mass	=	0.51	(gm)	density	=	3.06	(gm/cc)
	Ca5(PO4)3OH
	G	=	-7642.01	(J)	H	=	-6239.84	(J)	S	=	1.12	(J/K)	V	=	0.17	(cc)	Cp	=	0.58	(J/K)
Viscosity	of	the	System:	4.53	(log	10	poise)
System	mass	=	98.47	(gm)	density	=	2.5	(gm/cc)
	G	=	-1.49683e+06	(J)	H	=	-1.18367e+06	(J)	S	=	249.9	(J/K)	V	=	39.32	(cc)	Cp	=	128.08	(J/K)
Oxygen	delta	moles	=	0.00355719	delta	grams	=	0.113826
	G	=	-1008.69	(J)	H	=	112.58	(J)	S	=	0.89	(J/K)	V	=	370.63	(cc)	Cp	=	0.13	(J/K)
**********----------**********
Title:	Dummy	Title
T	=	970	(C)	P	=	1	(kbars)	log(10)	f	O2	=	-12.28	delta	HM	=	-6.58	NNO	=	-1.59	QFM	=	-1	COH	=	0.9	IW	=	2.83
Constraint	Flags:	fO2	path	=	QFM-1	Fractionate	Solids
Liquid	mass	=	52.48	(gm)	density	=	2.34	(gm/cc)	viscosity	=	3.38	(log	10	poise)	(analysis	in	wt	%)
	G	=	-835202	(J)	H	=	-656064	(J)	S	=	144.1	(J/K)	V	=	22.4	(cc)	Cp	=	74.38	(J/K)
	SiO2	TiO2	Al2O3	Fe2O3	Cr2O3	FeO	MnO	MgO	NiO	CoO	CaO	Na2O	K2O	P2O5	H2O	CO2	SO3	Cl2O-1	F2O-1
	55.55	0.54	16.4	1.19	0	7.67	0.39	1.04	0	0	5.65	4.61	2.37	0.76	3.82	0	0	0	0
olivine	mass	=	0.86	(gm)	density	=	3.82	(gm/cc)	(analysis	in	mole	%)
	(Ca0.01Mg0.39Fe''0.59Mn0.02Co0.00Ni0.00)2SiO4
	G	=	-9805.84	(J)	H	=	-7582.61	(J)	S	=	1.79	(J/K)	V	=	0.22	(cc)	Cp	=	0.9	(J/K)
	tephroite	fayalite	co-olivine	ni-olivine	monticellite	forsterite
	1.71	59.27	0	0	1.26	37.77
feldspar	mass	=	2.75	(gm)	density	=	2.67	(gm/cc)	(analysis	in	mole	%)
	K0.01Na0.30Ca0.70Al1.70Si2.30O8
	G	=	-46210.8	(J)	H	=	-38514.9	(J)	S	=	6.19	(J/K)	V	=	1.03	(cc)	Cp	=	3.32	(J/K)
	albite	anorthite	sanidine
	29.54	69.57	0.9
spinel	mass	=	0.33	(gm)	density	=	4.72	(gm/cc)	(analysis	in	mole	%)
	Fe''1.39Mg0.14Fe'''0.75Al0.18Cr0.00Ti0.53O4
	G	=	-2720.63	(J)	H	=	-1896.49	(J)	S	=	0.66	(J/K)	V	=	0.07	(cc)	Cp	=	0.3	(J/K)
	chromite	hercynite	magnetite	spinel	ulvospinel
	0	-5.1	37.74	14.25	53.11
apatite	mass	=	0.11	(gm)	density	=	3.06	(gm/cc)
	Ca5(PO4)3OH
	G	=	-1599.47	(J)	H	=	-1309.12	(J)	S	=	0.23	(J/K)	V	=	0.03	(cc)	Cp	=	0.12	(J/K)
water	mass	=	0.68	(gm)	density	=	0.18	(gm/cc)
	H2O
	G	=	-16500.5	(J)	H	=	-7987.4	(J)	S	=	6.85	(J/K)	V	=	3.76	(cc)	Cp	=	2.15	(J/K)
Total	solids	mass	=	4.72	(gm)	density	=	0.92	(gm/cc)
	G	=	-76837.3	(J)	H	=	-57290.5	(J)	S	=	15.72	(J/K)	V	=	5.11	(cc)	Cp	=	6.8	(J/K)
Summary	of	all	fractionated	phases:	(total	mass	=	41.27	grams)
olivine	mass	=	3.6	(gm)	density	=	3.63	(gm/cc)	(analysis	in	mole	%)
	(Ca0.01Mg0.56Fe''0.43Mn0.01Co0.00Ni0.00)2SiO4
	G	=	-45837.6	(J)	H	=	-36260.2	(J)	S	=	7.7	(J/K)	V	=	0.99	(cc)	Cp	=	3.99	(J/K)
	tephroite	fayalite	co-olivine	ni-olivine	monticellite	forsterite
	1	43.44	0	0	1.24	54.32
clinopyroxene	mass	=	20.41	(gm)	density	=	3.33	(gm/cc)	(analysis	in	mole	%)
	cpx	Na0.01Ca0.88Fe''0.24Mg0.68Fe'''0.05Ti0.08Al0.30Si1.75O6
	G	=	-313517	(J)	H	=	-259459	(J)	S	=	43.48	(J/K)	V	=	6.13	(cc)	Cp	=	23.24	(J/K)
	diopside	clinoenstatit	hedenbergite	alumino-buffo	buffonite	essenite	jadeite
	38.84	10.48	23.89	19.96	-3.35	8.73	1.44
feldspar	mass	=	7.94	(gm)	density	=	2.68	(gm/cc)	(analysis	in	mole	%)
	K0.01Na0.24Ca0.75Al1.75Si2.25O8
[truncated: 1,076 more rows]

## Sheet: VFC1_FMQ_1MPa_isobaric
**********----------**********
[truncated: 2,418 more rows]

[truncated: 5 more sheets: VFC2_FMQ_1MPa_isobaric, VFC3_FMQ_3MPa_isobaric, Crystallization phases, ELIP's major element-nomallized, Legends]
